# Supplementary material for: The Impact of Mutational Hotspots on Cancer Survival
Source: Cancers (Basel). 2024 Mar 6;16(5):1072. doi: 10.3390/cancers16051072 (PMC10931094; doi:10.3390/cancers16051072)
Supplement: Supplementary file 1 [file cancers-16-01072-s001.zip]

Archive with 5 entries (5 files):
- supplementary Figures.pdf
- supplementary Table S1 - Hotspot X vs. All.xlsx
- supplementary Table S2 - Hotspot X vs. Gene.xlsx
- supplementary Table S3 - HotSpot X vs. Other HS.xlsx
- supplementary Table S4 - Hotspot X vs. Hotspot Y.xlsx
