# Supplementary material for: The Impact of Mutational Hotspots on Cancer Survival
Source: Cancers (Basel). 2024 Mar 6;16(5):1072. doi: 10.3390/cancers16051072 (PMC10931094; doi:10.3390/cancers16051072)
Supplement: Supplementary file 1 [file cancers-16-01072-s001.zip › supplementary Table S1 - Hotspot X vs. All.xlsx]

## Sheet: Hotspot X vs All
Hotspot ID	TCGA Mutated Samples	Cancer	Site	Gene	Position	Transcript	n With HotSpot	n Without HotSpot	p Valorate	Hazard Ratio	p Hazard Ratio	p Log Rank	p CoxPH
IDH1:132:01:ENST00000345146	390	LGG	1	IDH1	132	ENST00000345146	384	115	0	0.2231	0	0.9027	0.6533
IDH1:132:01:ENST00000345146	22	GBM	1	IDH1	132	ENST00000345146	19	341	0.0001	0.2898	0.0006	0.287	0.1408
SIPA1L1:58:01:ENST00000555818	6	UCEC	1	SIPA1L1	58	ENST00000555818	4	470	0.0004	0	0.9943	0.1721	0.0343
BRAF:600:06:ENST00000288602	177	SKCM	6	BRAF	600	ENST00000288602	141	279	0.0005	0.6042	0.0009	0	0
TTN:20780:06:ENST00000591111	5	SKCM	6	TTN	20780	ENST00000591111	4	416	0.001	0	0.9904	0.7998	0.483
RYR2:4137:06:ENST00000366574	4	SKCM	6	RYR2	4137	ENST00000366574	4	416	0.0012	0	0.9905	0.7209	0.3909
EGFR:252:01:ENST00000275493	5	LGG	1	EGFR	252	ENST00000275493	5	494	0.0017	9.2998	0	0.8602	0.5524
SF3B1:625:01:ENST00000335508	14	UVM	1	SF3B1	625	ENST00000335508	13	66	0.0018	0	0.9976	0.9861	0.8681
ZNF728:200:06:ENST00000594710	7	SKCM	6	ZNF728	200	ENST00000594710	6	414	0.0021	0.2419	0.048	0.307	0.0897
OR6N1:229:06:ENST00000335094	6	SKCM	6	OR6N1	229	ENST00000335094	4	416	0.0031	0.1692	0.0781	0.2217	0.0451
THBS3:305:01:ENST00000368378	5	UCEC	1	THBS3	305	ENST00000368378	5	469	0.0032	0	0.9943	0.2064	0.0486
CDKN2A:108:01:ENST00000304494	6	LUSC	1	CDKN2A	108	ENST00000304494	6	458	0.0044	3.4777	0.0027	0.3445	0.0396
KRAS:12:01:ENST00000256078	11	BLCA	1	KRAS	12	ENST00000256078	10	376	0.0046	3.7829	0.0003	0.9346	0.7241
CIC:215:01:ENST00000575354	12	LGG	1	CIC	215	ENST00000575354	12	487	0.0049	0	0.994	0.9309	0.6989
TP53:196:01:ENST00000269305	8	BRCA	1	TP53	196	ENST00000269305	8	935	0.0066	0	0.9933	0.2179	0.0562
TP53:176:01:ENST00000269305	5	LUSC	1	TP53	176	ENST00000269305	5	459	0.0076	3.8306	0.0032	0.4734	0.0845
ADNP2:324:01:ENST00000262198	5	UCEC	1	ADNP2	324	ENST00000262198	5	469	0.0078	0	0.9945	0.3599	0.1183
TMEM200C:122:01:ENST00000383490	5	UCEC	1	TMEM200C	122	ENST00000383490	5	469	0.0089	0	0.9945	0.4896	0.197
PHF20L1:535:01:ENST00000395386	4	UCEC	1	PHF20L1	535	ENST00000395386	4	470	0.0094	0	0.9949	0.4512	0.1679
TP53:248:01:ENST00000269305	13	GBM	1	TP53	248	ENST00000269305	12	348	0.0104	0.4588	0.0309	0.9466	0.7341
NFE2L2:79:01:ENST00000397062	5	HNSC	1	NFE2L2	79	ENST00000397062	5	470	0.0106	3.7876	0.0034	0.6078	0.1591
OR51S1:241:06:ENST00000322101	5	SKCM	6	OR51S1	241	ENST00000322101	5	415	0.0106	0.1795	0.0885	0.787	0.4668
TP53:306:01:ENST00000269305	6	HNSC	1	TP53	306	ENST00000269305	6	469	0.0108	4.8859	0.0005	0.8231	0.5769
SIGLEC6:83:06:ENST00000425629	4	SKCM	6	SIGLEC6	83	ENST00000425629	4	416	0.0118	0.1968	0.1073	0.7645	0.4355
SOX9:257:01:ENST00000245479	4	COAD	1	SOX9	257	ENST00000245479	4	338	0.0122	0	0.9944	0.5743	0.2558
KIT:418:03:ENST00000288135	4	LAML	3	KIT	418	ENST00000288135	4	114	0.0124	0.1741	0.0834	0.779	0.4537
APC:876:01:ENST00000257430	10	READ	1	APC	876	ENST00000257430	8	110	0.0128	0	0.9974	0.6775	0.3589
ATP11B:884:01:ENST00000323116	7	UCEC	1	ATP11B	884	ENST00000323116	4	470	0.0129	0	0.995	0.2477	0.062
ARFGAP2:93:01:ENST00000524782	5	UCEC	1	ARFGAP2	93	ENST00000524782	5	469	0.0134	0	0.9946	0.3692	0.1227
RP1:1118:06:ENST00000220676	4	SKCM	6	RP1	1118	ENST00000220676	4	416	0.0137	0.2051	0.1153	0.6865	0.3512
OR14K1:14:01:ENST00000283225	17	UCEC	1	OR14K1	14	ENST00000283225	13	461	0.0143	0	0.9952	0.5635	0.2635
ALPK2:523:01:ENST00000361673	6	UCEC	1	ALPK2	523	ENST00000361673	4	470	0.0151	0	0.995	0.5195	0.2139
TP53:193:01:ENST00000269305	9	HNSC	1	TP53	193	ENST00000269305	9	466	0.0155	3.0949	0.0035	0.9602	0.7681
TP53:179:01:ENST00000269305	5	OV	1	TP53	179	ENST00000269305	5	405	0.0159	0.1765	0.0836	0.8854	0.6337
TP53:159:01:ENST00000269305	4	LUAD	1	TP53	159	ENST00000269305	4	475	0.016	3.3691	0.0166	0.3337	0.0366
TP53:266:01:ENST00000269305	6	OV	1	TP53	266	ENST00000269305	5	405	0.0167	3.2222	0.01	0.5253	0.1096
TP53:273:01:ENST00000269305	7	GBM	1	TP53	273	ENST00000269305	6	354	0.0172	0.2408	0.0455	0.5128	0.294
AKAP9:39:01:ENST00000356239	11	STAD	1	AKAP9	39	ENST00000356239	4	365	0.0173	0	0.9929	0.813	0.5016
GABRB3:170:01:ENST00000311550	4	UCEC	1	GABRB3	170	ENST00000311550	4	470	0.0182	0	0.9951	0.388	0.1299
VHL:158:01:ENST00000256474	7	KIRC	1	VHL	158	ENST00000256474	7	323	0.0183	2.9072	0.0213	0.3548	0.1007
ARID1A:1335:01:ENST00000324856	5	UCEC	1	ARID1A	1335	ENST00000324856	4	470	0.0184	0	0.9951	0.2324	0.0566
PPP6C:264:06:ENST00000373547	8	SKCM	6	PPP6C	264	ENST00000373547	7	413	0.0189	0.3822	0.1012	0.4111	0.1444
SALL1:675:06:ENST00000251020	6	SKCM	6	SALL1	675	ENST00000251020	5	415	0.0207	0	0.9917	0.9456	0.7443
SMAD2:464:01:ENST00000262160	5	COAD	1	SMAD2	464	ENST00000262160	4	338	0.022	5.84	0.0029	0.9123	0.6473
APC:1489:01:ENST00000257430	4	COAD	1	APC	1489	ENST00000257430	4	338	0.0221	0	0.9946	0.5573	0.2444
PPIG:12:01:ENST00000260970	4	UCEC	1	PPIG	12	ENST00000260970	4	470	0.0223	0	0.9951	0.6749	0.3441
AKT1:17:01:ENST00000349310	25	BRCA	1	AKT1	17	ENST00000349310	24	919	0.0224	0	0.9917	0.9478	0.7471
SCAP:116:06:ENST00000265565	4	SKCM	6	SCAP	116	ENST00000265565	4	416	0.0249	0.3643	0.1577	0.2437	0.0523
ERBB2:310:01:ENST00000269571	6	CESC	1	ERBB2	310	ENST00000269571	4	244	0.0259	5.3739	0.0048	0.9187	0.6606
ZFP37:161:01:ENST00000374227	8	UCEC	1	ZFP37	161	ENST00000374227	7	467	0.0267	0	0.9942	0.8187	0.5113
STAB2:243:06:ENST00000388887	4	SKCM	6	STAB2	243	ENST00000388887	4	416	0.0271	0.3634	0.1587	0.1238	0.0124
ATRIP:345:01:ENST00000320211	7	UCEC	1	ATRIP	345	ENST00000320211	5	469	0.0277	0	0.9948	0.5495	0.2401
TMC5:276:06:ENST00000396229	7	SKCM	6	TMC5	276	ENST00000396229	5	415	0.0278	0.2049	0.1165	0.71	0.3762
SLC3A2:300:01:ENST00000377890	19	UCEC	1	SLC3A2	300	ENST00000377890	17	457	0.0289	0	0.995	0.8935	0.6411
EGFR:858:01:ENST00000275493	23	LUAD	1	EGFR	858	ENST00000275493	21	458	0.0293	2.0313	0.0183	0.9569	0.7623
WNT1:169:01:ENST00000293549	9	COAD	1	WNT1	169	ENST00000293549	6	336	0.0301	0	0.994	0.6344	0.3115
EEF1A1:432:01:ENST00000309268	8	LIHC	1	EEF1A1	432	ENST00000309268	4	345	0.0316	6.0888	0.0021	0.9834	0.8595
PTCH1:1203:01:ENST00000331920	8	UCEC	1	PTCH1	1203	ENST00000331920	7	467	0.0317	0	0.9942	0.4382	0.1683
TP53:244:01:ENST00000269305	5	OV	1	TP53	244	ENST00000269305	5	405	0.032	0.1973	0.1056	0.9999	0.9886
AMER1:497:01:ENST00000330258	5	COAD	1	AMER1	497	ENST00000330258	5	337	0.0325	5.3474	0.005	0.6947	0.4453
UBR4:2803:01:ENST00000375254	6	UCEC	1	UBR4	2803	ENST00000375254	5	469	0.0328	0	0.9949	0.5102	0.212
TP53:205:01:ENST00000269305	4	UCEC	1	TP53	205	ENST00000269305	4	470	0.0329	3.2936	0.0431	0.2642	0.0492
NFRKB:311:01:ENST00000446488	8	COAD	1	NFRKB	311	ENST00000446488	6	336	0.033	0	0.994	0.5843	0.2693
PCDHGC3:689:01:ENST00000308177	6	COAD	1	PCDHGC3	689	ENST00000308177	4	338	0.0346	0	0.9948	0.6663	0.3345
TP53:132:01:ENST00000269305	5	COAD	1	TP53	132	ENST00000269305	4	338	0.0351	4.5671	0.0103	0.6895	0.3311
SLC25A52:88:06:ENST00000269205	4	SKCM	6	SLC25A52	88	ENST00000269205	4	416	0.0354	0.3839	0.1795	0.3066	0.0777
COL8A1:599:01:ENST00000261037	5	UCEC	1	COL8A1	599	ENST00000261037	5	469	0.0357	0	0.9949	0.6316	0.3069
BRWD1:2309:01:ENST00000333229	8	STAD	1	BRWD1	2309	ENST00000333229	4	365	0.036	3.0947	0.0261	0.4417	0.0715
RUNX1:96:01:ENST00000344691	7	BRCA	1	RUNX1	96	ENST00000344691	7	936	0.0368	0	0.9943	0.6736	0.3505
CDH1:126:01:ENST00000261769	4	UCEC	1	CDH1	126	ENST00000261769	4	470	0.0374	13.5568	0.0004	0.0921	0.1023
TP53:125:01:ENST00000269305	4	LGG	1	TP53	125	ENST00000269305	4	495	0.0375	3.7408	0.0247	0.5863	0.2358
CIC:202:01:ENST00000575354	5	LGG	1	CIC	202	ENST00000575354	4	495	0.0381	0.3158	0.2549	0.3003	0.0807
ACSM5:283:01:ENST00000331849	4	UCEC	1	ACSM5	283	ENST00000331849	4	470	0.0385	0	0.9953	0.193	0.0391
KRAS:13:01:ENST00000256078	15	UCEC	1	KRAS	13	ENST00000256078	14	460	0.0393	0	0.9954	0.8975	0.6494
KRAS:61:01:ENST00000256078	8	PAAD	1	KRAS	61	ENST00000256078	7	169	0.0394	2.803	0.0159	0.9384	0.707
APC:1114:01:ENST00000257430	7	READ	1	APC	1114	ENST00000257430	5	113	0.0395	0	0.9979	0.5666	0.2544
NRG1:91:01:ENST00000405005	4	UCEC	1	NRG1	91	ENST00000405005	4	470	0.0397	0	0.9953	0.6373	0.309
TCF19:25:01:ENST00000376255	5	UCEC	1	TCF19	25	ENST00000376255	4	470	0.0397	10.7804	0.001	0.3404	0.226
THSD7B:1023:06:ENST00000272643	7	SKCM	6	THSD7B	1023	ENST00000272643	4	416	0.0402	0.2344	0.1519	0.8304	0.5214
FGFR3:249:01:ENST00000260795	30	BLCA	1	FGFR3	249	ENST00000260795	29	357	0.0404	0.5052	0.0596	0.8874	0.6302
PRSS35:213:01:ENST00000369700	10	UCEC	1	PRSS35	213	ENST00000369700	6	468	0.0404	0	0.9946	0.3071	0.0919
TP53:280:01:ENST00000269305	4	LUSC	1	TP53	280	ENST00000269305	4	460	0.0406	6.8969	0.001	0.695	0.4641
OR2A5:71:06:ENST00000408906	7	SKCM	6	OR2A5	71	ENST00000408906	4	416	0.0418	0.3847	0.1839	0.1559	0.0191
ARID1A:1989:01:ENST00000324856	20	UCEC	1	ARID1A	1989	ENST00000324856	5	469	0.0422	0	0.9949	0.568	0.2538
TTK:192:01:ENST00000369798	5	UCEC	1	TTK	192	ENST00000369798	5	469	0.0422	0	0.9949	0.5299	0.2249
IDH2:172:01:ENST00000330062	20	LGG	1	IDH2	172	ENST00000330062	20	479	0.0428	0.1792	0.087	0.8921	0.6404
KRAS:12:01:ENST00000256078	131	PAAD	1	KRAS	12	ENST00000256078	128	48	0.0433	1.5985	0.0551	0.7086	0.4026
CDK4:24:06:ENST00000257904	4	SKCM	6	CDK4	24	ENST00000257904	4	416	0.0433	2.8366	0.0395	0.4411	0.0711
PPP2R1A:179:01:ENST00000322088	26	UCEC	1	PPP2R1A	179	ENST00000322088	26	448	0.0434	2.3889	0.0197	0.8604	0.5916
SETD1B:8:01:ENST00000604567	27	COAD	1	SETD1B	8	ENST00000604567	12	330	0.0435	0	0.9953	0.8759	0.6117
AHCTF1:913:01:ENST00000326225	6	UCEC	1	AHCTF1	913	ENST00000326225	4	470	0.0436	0	0.9953	0.2059	0.0436
TET1:1387:01:ENST00000373644	5	UCEC	1	TET1	1387	ENST00000373644	5	469	0.0451	0	0.995	0.2525	0.065
GLYATL1:76:06:ENST00000317391	5	SKCM	6	GLYATL1	76	ENST00000317391	4	416	0.0454	0	0.9927	0.871	0.6153
NF1:78:01:ENST00000358273	4	UCEC	1	NF1	78	ENST00000358273	4	470	0.0487	7.5764	0.0049	0.5856	0.363
PIK3CA:1047:01:ENST00000263967	21	COAD	1	PIK3CA	1047	ENST00000263967	16	326	0.0494	0.2197	0.1325	0.7277	0.4129
MAX:28:01:ENST00000358664	6	UCEC	1	MAX	28	ENST00000358664	6	468	0.0502	0	0.9947	0.5213	0.2219
BRAF:600:01:ENST00000288602	64	SKCM	1	BRAF	600	ENST00000288602	47	373	0.0503	2.9687	0.0002	0	0
TP53:126:01:ENST00000269305	6	LUSC	1	TP53	126	ENST00000269305	6	458	0.052	4.2305	0.0045	0.7138	0.4561
ERBB2:777:01:ENST00000269571	4	BRCA	1	ERBB2	777	ENST00000269571	4	939	0.0523	6.4498	0.0094	0.9447	0.7254
FBXW7:545:01:ENST00000281708	4	UCEC	1	FBXW7	545	ENST00000281708	4	470	0.0523	7.156	0.0068	0.4369	0.2756
GNAQ:209:01:ENST00000286548	37	UVM	1	GNAQ	209	ENST00000286548	37	42	0.0526	0.4312	0.0641	0.9398	0.7244
TP53:249:01:ENST00000269305	10	LIHC	1	TP53	249	ENST00000269305	10	339	0.0541	2.5607	0.0256	0.9853	0.8661
FBXW7:505:01:ENST00000281708	7	BLCA	1	FBXW7	505	ENST00000281708	7	379	0.0557	3.09	0.0131	0.9937	0.9117
TP53:175:01:ENST00000269305	11	ESCA	1	TP53	175	ENST00000269305	11	166	0.0582	0.3176	0.11	0.9803	0.8454
ATAD2B:307:01:ENST00000238789	5	UCEC	1	ATAD2B	307	ENST00000238789	5	469	0.0588	3.3319	0.041	0.3582	0.1014
TP53:282:01:ENST00000269305	5	BRCA	1	TP53	282	ENST00000269305	5	938	0.0593	6.8964	0.0071	0.9737	0.822
TMC5:690:06:ENST00000396229	6	SKCM	6	TMC5	690	ENST00000396229	4	416	0.0595	0	0.993	0.8133	0.5429
SCAF4:250:01:ENST00000286835	12	UCEC	1	SCAF4	250	ENST00000286835	12	462	0.0602	0	0.9958	0.8068	0.4996
ANKRD30A:1129:06:ENST00000611781	4	SKCM	6	ANKRD30A	1129	ENST00000611781	4	416	0.0626	5.1568	0.0052	0.8922	0.6608
TP53:248:01:ENST00000269305	14	LGG	1	TP53	248	ENST00000269305	14	485	0.0628	0.3621	0.1547	0.5587	0.2577
RHOQ:193:01:ENST00000238738	4	UCEC	1	RHOQ	193	ENST00000238738	4	470	0.0636	0	0.9955	0.6617	0.3313
SPEG:2233:01:ENST00000312358	4	UCEC	1	SPEG	2233	ENST00000312358	4	470	0.0643	0	0.9954	0.8402	0.5363
VHL:65:01:ENST00000256474	4	KIRC	1	VHL	65	ENST00000256474	4	326	0.0663	2.937	0.068	0.4362	0.1307
METAP1:329:01:ENST00000296411	4	UCEC	1	METAP1	329	ENST00000296411	4	470	0.0666	0	0.9955	0.4794	0.1882
ERVMER34-1:300:01:ENST00000440542	9	UCEC	1	ERVMER34-1	300	ENST00000440542	8	466	0.0672	0	0.9942	0.8069	0.4969
AP1S1:122:01:ENST00000337619	9	UCEC	1	AP1S1	122	ENST00000337619	7	467	0.0681	0	0.9945	0.7612	0.441
OR6P1:32:01:ENST00000334632	4	UCEC	1	OR6P1	32	ENST00000334632	4	470	0.0685	5.594	0.0168	0.73	0.4732
FAM46D:69:01:ENST00000308293	5	STAD	1	FAM46D	69	ENST00000308293	5	364	0.069	0	0.9932	0.9334	0.7166
PIK3CA:111:01:ENST00000263967	5	UCEC	1	PIK3CA	111	ENST00000263967	4	470	0.069	0	0.9955	0.7663	0.4402
MYH2:1382:06:ENST00000245503	5	SKCM	6	MYH2	1382	ENST00000245503	5	415	0.0697	0.2523	0.1697	0.9936	0.91
NFASC:165:01:ENST00000339876	9	UCEC	1	NFASC	165	ENST00000339876	7	467	0.0697	0	0.9945	0.8499	0.5555
EGFR:598:01:ENST00000275493	4	LGG	1	EGFR	598	ENST00000275493	4	495	0.0703	8.745	0.0029	0.522	0.3259
MYCN:44:01:ENST00000281043	7	UCEC	1	MYCN	44	ENST00000281043	7	467	0.0706	0	0.9945	0.9987	0.9583
PPP2R5A:NA:01:ENST00000261461	5	UCEC	1	PPP2R5A	NA	ENST00000261461	5	469	0.0708	0	0.9951	0.767	0.4436
ACTB:158:01:ENST00000331789	4	BLCA	1	ACTB	158	ENST00000331789	4	382	0.0711	0	0.9934	0.8675	0.6107
NPAP1:210:06:ENST00000329468	8	SKCM	6	NPAP1	210	ENST00000329468	4	416	0.0722	0.2745	0.1975	0.8844	0.6045
RP11-108K14.8:334:01:ENST00000468317	8	UCEC	1	RP11-108K14.8	334	ENST00000468317	7	467	0.073	0	0.9945	0.8925	0.6234
FAH:154:01:ENST00000261755	5	OV	1	FAH	154	ENST00000261755	4	406	0.0746	2.5376	0.0655	0.5954	0.1509
SETD1B:8:01:ENST00000604567	50	UCEC	1	SETD1B	8	ENST00000604567	44	430	0.0752	0.4435	0.1129	0.9732	0.8153
MUC4:3516:01:ENST00000463781	6	TGCT	1	MUC4	3516	ENST00000463781	5	123	0.0753	0	0.9989	0.4089	0.1485
TP53:220:01:ENST00000269305	5	LUSC	1	TP53	220	ENST00000269305	5	459	0.0754	2.8337	0.0396	0.8288	0.5025
PTEN:267:01:ENST00000371953	6	COAD	1	PTEN	267	ENST00000371953	5	337	0.076	0	0.9947	0.9225	0.6851
PTEN:267:01:ENST00000371953	8	STAD	1	PTEN	267	ENST00000371953	5	364	0.0764	2.8581	0.0387	0.8668	0.5624
OR2M2:165:06:ENST00000359682	5	SKCM	6	OR2M2	165	ENST00000359682	5	415	0.0773	0.2578	0.1765	0.9907	0.8902
OSBPL1A:793:01:ENST00000319481	7	UCEC	1	OSBPL1A	793	ENST00000319481	4	470	0.0777	0	0.9955	0.808	0.4919
NRIP1:729:01:ENST00000318948	7	STAD	1	NRIP1	729	ENST00000318948	4	365	0.079	2.3159	0.0978	0.3375	0.0378
ITGB4:201:01:ENST00000200181	4	UCEC	1	ITGB4	201	ENST00000200181	4	470	0.0793	0	0.9955	0.7144	0.383
PRRC2C:1654:01:ENST00000338920	5	UCEC	1	PRRC2C	1654	ENST00000338920	4	470	0.0806	0	0.9955	0.7273	0.3964
TP53:278:01:ENST00000269305	10	LUSC	1	TP53	278	ENST00000269305	10	454	0.0813	0.3489	0.1385	0.9796	0.8396
NEK7:65:01:ENST00000367385	4	UCEC	1	NEK7	65	ENST00000367385	4	470	0.0818	4.9459	0.0261	0.8997	0.6643
PIK3CA:93:01:ENST00000263967	11	UCEC	1	PIK3CA	93	ENST00000263967	8	466	0.0827	0	0.9943	0.8678	0.5828
TP53:161:01:ENST00000269305	5	BLCA	1	TP53	161	ENST00000269305	4	382	0.0846	4.2435	0.0135	0.8694	0.629
NRAS:61:01:ENST00000369535	6	UCEC	1	NRAS	61	ENST00000369535	5	469	0.0865	0	0.9952	0.7235	0.3961
PTEN:130:01:ENST00000371953	78	UCEC	1	PTEN	130	ENST00000371953	63	411	0.0865	0.5027	0.1051	0.6537	0.3649
TP53:248:01:ENST00000269305	4	LUAD	1	TP53	248	ENST00000269305	4	475	0.0866	0	0.994	0.977	0.8275
TAF1:843:01:ENST00000373790	6	UCEC	1	TAF1	843	ENST00000373790	6	468	0.0866	0	0.9949	0.7591	0.4368
UPF3A:267:01:ENST00000375299	15	UCEC	1	UPF3A	267	ENST00000375299	12	462	0.0871	2.9651	0.035	0.445	0.2387
RNF152:95:06:ENST00000312828	5	SKCM	6	RNF152	95	ENST00000312828	4	416	0.0874	4.0582	0.0173	0.9906	0.8935
TP53:175:01:ENST00000269305	27	COAD	1	TP53	175	ENST00000269305	22	320	0.0895	0.4406	0.1657	0.2948	0.101
TP53:179:01:ENST00000269305	4	GBM	1	TP53	179	ENST00000269305	4	356	0.0899	0.4667	0.1903	0.8658	0.5619
MROH2B:173:06:ENST00000399564	6	SKCM	6	MROH2B	173	ENST00000399564	4	416	0.09	3.9528	0.0191	0.9827	0.8564
TAP2:75:01:ENST00000374897	6	COAD	1	TAP2	75	ENST00000374897	5	337	0.0909	0	0.9948	0.9383	0.7202
MVK:141:01:ENST00000228510	9	UCEC	1	MVK	141	ENST00000228510	8	466	0.091	0	0.9943	1	0.9926
CLMN:842:01:ENST00000298912	4	UCEC	1	CLMN	842	ENST00000298912	4	470	0.0914	0	0.9956	0.296	0.0805
SULT1C3:95:06:ENST00000329106	4	SKCM	6	SULT1C3	95	ENST00000329106	4	416	0.092	2.2744	0.1045	0.3587	0.0435
PTEN:7:01:ENST00000371953	8	UCEC	1	PTEN	7	ENST00000371953	4	470	0.0922	0	0.9955	0.7277	0.3969
GANAB:23:01:ENST00000356638	4	UCEC	1	GANAB	23	ENST00000356638	4	470	0.0924	4.5778	0.034	0.9855	0.8674
FGFR3:373:01:ENST00000260795	8	BLCA	1	FGFR3	373	ENST00000260795	8	378	0.0929	0.2345	0.1483	0.9525	0.7587
MAP2K1:124:06:ENST00000307102	12	SKCM	6	MAP2K1	124	ENST00000307102	9	411	0.0945	0.5194	0.1964	0.5402	0.2341
CDH11:357:01:ENST00000268603	4	STAD	1	CDH11	357	ENST00000268603	4	365	0.0949	3.6089	0.0291	0.812	0.5632
TP53:234:01:ENST00000269305	9	LUSC	1	TP53	234	ENST00000269305	9	455	0.097	1.7029	0.1414	0.1033	0.0083
TP53:248:01:ENST00000269305	23	BLCA	1	TP53	248	ENST00000269305	22	364	0.0974	1.6989	0.0668	0.9577	0.7655
CD3G:71:01:ENST00000532917	8	UCEC	1	CD3G	71	ENST00000532917	4	470	0.0975	4.445	0.0381	0.9609	0.7837
IDH1:132:01:ENST00000345146	4	PRAD	1	IDH1	132	ENST00000345146	4	486	0.0979	0	0.9983	0.3209	0.0946
HRAS:12:01:ENST00000311189	11	HNSC	1	HRAS	12	ENST00000311189	11	464	0.098	0.3529	0.1429	0.9934	0.9104
TP53:32:01:ENST00000269305	4	HNSC	1	TP53	32	ENST00000269305	4	471	0.0983	3.5573	0.0296	0.9635	0.7951
ACVR2A:437:01:ENST00000241416	13	COAD	1	ACVR2A	437	ENST00000241416	7	335	0.0986	0	0.9942	0.8755	0.5928
ZNF716:197:01:ENST00000420713	4	UCEC	1	ZNF716	197	ENST00000420713	4	470	0.0996	0	0.9956	0.8801	0.6005
TOP2A:215:01:ENST00000423485	4	OV	1	TOP2A	215	ENST00000423485	4	406	0.1	2.3315	0.0939	0.5393	0.117
ARID1A:1721:01:ENST00000324856	5	UCEC	1	ARID1A	1721	ENST00000324856	4	470	0.1004	0	0.9956	0.6944	0.3623
TP53:176:01:ENST00000269305	6	HNSC	1	TP53	176	ENST00000269305	6	469	0.1006	0.4162	0.2219	0.2815	0.0738
EGFR:746:01:ENST00000275493	17	LUAD	1	EGFR	746	ENST00000275493	15	464	0.1017	0.4368	0.1552	0.9994	0.9734
ANKRD20A1:459:01:ENST00000562196	6	UCEC	1	ANKRD20A1	459	ENST00000562196	5	469	0.1031	0	0.9952	0.9117	0.6569
TP53:248:01:ENST00000269305	21	OV	1	TP53	248	ENST00000269305	21	389	0.1057	1.733	0.0546	0.6627	0.3894
PIK3CA:542:01:ENST00000263967	23	UCEC	1	PIK3CA	542	ENST00000263967	23	451	0.1062	0.2404	0.1567	0.5149	0.2673
RFX5:19:01:ENST00000290524	5	COAD	1	RFX5	19	ENST00000290524	4	338	0.1079	0	0.9952	0.8784	0.6062
OFD1:237:01:ENST00000340096	4	UCEC	1	OFD1	237	ENST00000340096	4	470	0.11	4.1426	0.0482	0.9843	0.8622
GRIN2A:1322:06:ENST00000330684	5	SKCM	6	GRIN2A	1322	ENST00000330684	4	416	0.1103	0.3006	0.2311	0.9337	0.7017
ARID1A:1519:01:ENST00000324856	4	UCEC	1	ARID1A	1519	ENST00000324856	4	470	0.1123	0	0.9956	0.7984	0.4796
CTNNB1:41:01:ENST00000349496	12	UCEC	1	CTNNB1	41	ENST00000349496	11	463	0.1124	0	0.9939	0.9479	0.7469
SV2A:138:01:ENST00000369146	7	UCEC	1	SV2A	138	ENST00000369146	7	467	0.1127	0	0.9947	0.8231	0.5182
FSIP2:2680:01:ENST00000424728	6	UCEC	1	FSIP2	2680	ENST00000424728	5	469	0.1129	0	0.9953	0.9844	0.8592
TUBGCP2:883:01:ENST00000252936	4	UCEC	1	TUBGCP2	883	ENST00000252936	4	470	0.1161	4.0096	0.0533	0.9902	0.8905
KRAS:12:01:ENST00000256078	18	STAD	1	KRAS	12	ENST00000256078	15	354	0.1192	0.5007	0.1726	0.9853	0.8606
SMAD4:361:01:ENST00000342988	11	COAD	1	SMAD4	361	ENST00000342988	9	333	0.12	2.4378	0.084	0.9798	0.8362
PIK3CA:1047:01:ENST00000263967	5	UCS	1	PIK3CA	1047	ENST00000263967	5	47	0.1206	2.9359	0.0503	0.7984	0.5477
TP53:245:01:ENST00000269305	4	BLCA	1	TP53	245	ENST00000269305	4	382	0.1207	0.3176	0.253	0.9673	0.7914
FBXW7:505:01:ENST00000281708	6	COAD	1	FBXW7	505	ENST00000281708	5	337	0.1211	2.4337	0.1321	0.4691	0.1658
CTNNB1:37:01:ENST00000349496	4	STAD	1	CTNNB1	37	ENST00000349496	4	365	0.1211	0.327	0.2668	0.3475	0.1054
TP53:278:01:ENST00000269305	5	HNSC	1	TP53	278	ENST00000269305	4	471	0.1222	0.3137	0.2522	0.7436	0.4129
TP53:238:01:ENST00000269305	4	GBM	1	TP53	238	ENST00000269305	4	356	0.1241	2.4662	0.0751	0.7593	0.2954
TP53:249:01:ENST00000269305	7	LUSC	1	TP53	249	ENST00000269305	7	457	0.125	0.4155	0.22	0.7588	0.4351
NLRP11:1016:06:ENST00000589093	4	SKCM	6	NLRP11	1016	ENST00000589093	4	416	0.1256	0.3069	0.2406	0.9686	0.7961
CCND1:286:01:ENST00000227507	7	UCEC	1	CCND1	286	ENST00000227507	7	467	0.1261	0	0.9948	0.9982	0.9523
PIK3CA:545:01:ENST00000263967	27	UCEC	1	PIK3CA	545	ENST00000263967	26	448	0.1262	0.3819	0.1789	0.9805	0.8442
FKBP9:129:01:ENST00000242209	4	UCEC	1	FKBP9	129	ENST00000242209	4	470	0.1274	0	0.9957	0.9281	0.6903
OR51E2:156:01:ENST00000396950	7	UCEC	1	OR51E2	156	ENST00000396950	5	469	0.1276	0	0.9953	0.7332	0.4066
TRIM49C:327:01:ENST00000448984	4	ESCA	1	TRIM49C	327	ENST00000448984	4	173	0.1278	2.9768	0.0666	0.9879	0.8722
SF3B1:902:01:ENST00000335508	7	BLCA	1	SF3B1	902	ENST00000335508	6	380	0.1285	2.032	0.1188	0.6329	0.2769
EGFR:289:01:ENST00000275493	21	GBM	1	EGFR	289	ENST00000275493	21	339	0.1286	0.6912	0.1656	1	0.9945
RGPD4:1394:06:ENST00000408999	5	SKCM	6	RGPD4	1394	ENST00000408999	4	416	0.1288	0.3126	0.2466	0.9489	0.7386
CELSR2:2017:01:ENST00000271332	4	UCEC	1	CELSR2	2017	ENST00000271332	4	470	0.13	3.7467	0.0659	0.9988	0.9607
KMT2B:174:01:ENST00000420124	7	STAD	1	KMT2B	174	ENST00000420124	5	364	0.1301	0	0.9937	0.2125	0.125
PCBP1:100:01:ENST00000303577	8	COAD	1	PCBP1	100	ENST00000303577	8	334	0.1304	0	0.9942	0.742	0.4573
XYLT2:529:01:ENST00000017003	21	COAD	1	XYLT2	529	ENST00000017003	9	333	0.1308	0	0.994	0.8227	0.5453
RPL22:15:01:ENST00000234875	47	UCEC	1	RPL22	15	ENST00000234875	43	431	0.1319	0.5371	0.1786	0.6451	0.3395
PARD3B:837:01:ENST00000406610	4	UCEC	1	PARD3B	837	ENST00000406610	4	470	0.1325	0	0.9957	0.9406	0.7189
FETUB:146:01:ENST00000265029	5	UCEC	1	FETUB	146	ENST00000265029	5	469	0.1343	3.7434	0.066	0.8891	0.6425
MYBL1:420:01:ENST00000522677	8	UCEC	1	MYBL1	420	ENST00000522677	5	469	0.1343	0	0.9954	0.9905	0.8885
FAM13B:782:01:ENST00000033079	5	UCEC	1	FAM13B	782	ENST00000033079	5	469	0.1352	0	0.9954	0.846	0.5467
PCLO:4044:06:ENST00000333891	4	SKCM	6	PCLO	4044	ENST00000333891	4	416	0.1353	0.4778	0.3003	0.4659	0.1648
TP53:220:01:ENST00000269305	7	HNSC	1	TP53	220	ENST00000269305	5	470	0.1356	0.3073	0.24	0.916	0.6648
IL37:202:06:ENST00000263326	6	SKCM	6	IL37	202	ENST00000263326	4	416	0.1359	3.0366	0.0576	0.9999	0.9882
CNBD1:396:01:ENST00000518476	10	STAD	1	CNBD1	396	ENST00000518476	9	360	0.136	2.4052	0.0546	0.3234	0.1892
ACO1:507:01:ENST00000309951	6	UCEC	1	ACO1	507	ENST00000309951	5	469	0.1373	0	0.9954	0.3893	0.1323
FHOD3:336:01:ENST00000359247	7	UCEC	1	FHOD3	336	ENST00000359247	6	468	0.1375	4.8321	0.0293	0.1341	0.0956
TP53:298:01:ENST00000269305	6	HNSC	1	TP53	298	ENST00000269305	5	470	0.1379	2.2478	0.1092	0.7204	0.3644
KIT:822:01:ENST00000288135	4	TGCT	1	KIT	822	ENST00000288135	4	124	0.138	0	0.999	0.3549	0.1162
C5orf42:2467:01:ENST00000425232	4	UCEC	1	C5orf42	2467	ENST00000425232	4	470	0.1408	0	0.9957	0.8039	0.4882
EYA1:94:01:ENST00000340726	5	UCEC	1	EYA1	94	ENST00000340726	5	469	0.1409	0	0.9954	0.4081	0.1433
PIK3R1:575:01:ENST00000521381	5	UCEC	1	PIK3R1	575	ENST00000521381	5	469	0.1414	3.6327	0.0734	0.777	0.508
GNA11:209:01:ENST00000078429	34	UVM	1	GNA11	209	ENST00000078429	34	45	0.1421	1.8534	0.1411	0.9306	0.7054
PIK3CA:1047:01:ENST00000263967	41	UCEC	1	PIK3CA	1047	ENST00000263967	41	433	0.1427	0.4995	0.1758	0.9939	0.9127
TP53:125:01:ENST00000269305	7	LUSC	1	TP53	125	ENST00000269305	7	457	0.1447	0.2793	0.2034	0.7488	0.4706
ZMIZ1:287:01:ENST00000334512	4	LGG	1	ZMIZ1	287	ENST00000334512	4	495	0.1455	0.4162	0.3884	0.8566	0.5581
C2orf42:410:01:ENST00000264434	5	UCEC	1	C2orf42	410	ENST00000264434	4	470	0.1463	0	0.9957	0.9775	0.8275
PIK3CA:726:01:ENST00000263967	6	CESC	1	PIK3CA	726	ENST00000263967	5	243	0.1474	2.3696	0.1464	0.7081	0.3656
OR10X1:310:06:ENST00000368150	5	SKCM	6	OR10X1	310	ENST00000368150	4	416	0.1474	0.3243	0.2617	0.9915	0.8944
CAAP1:191:01:ENST00000333916	4	UCEC	1	CAAP1	191	ENST00000333916	4	470	0.1497	3.4312	0.0857	0.7425	0.4029
SVIL:1863:01:ENST00000355867	11	COAD	1	SVIL	1863	ENST00000355867	5	337	0.1502	0	0.995	0.937	0.7095
OR6C75:200:01:ENST00000343399	6	UCEC	1	OR6C75	200	ENST00000343399	4	470	0.1503	3.4208	0.0864	0.848	0.5411
PTEN:233:01:ENST00000371953	26	UCEC	1	PTEN	233	ENST00000371953	24	450	0.1505	0.4055	0.2074	0.9871	0.8707
TP53:175:01:ENST00000269305	13	STAD	1	TP53	175	ENST00000269305	11	358	0.151	0.2434	0.1593	0.006	0.0075
ARID1A:693:01:ENST00000324856	5	UCEC	1	ARID1A	693	ENST00000324856	4	470	0.151	0	0.9958	0.9265	0.6881
CYB5R2:145:01:ENST00000299498	5	UCEC	1	CYB5R2	145	ENST00000299498	4	470	0.1524	3.4032	0.0885	0.9824	0.8486
TP53:248:01:ENST00000269305	10	PAAD	1	TP53	248	ENST00000269305	10	166	0.1541	1.9143	0.1001	0.8584	0.5997
CPAMD8:568:06:ENST00000443236	6	SKCM	6	CPAMD8	568	ENST00000443236	4	416	0.1554	0.3295	0.2683	0.9992	0.9674
MCF2:692:01:ENST00000370576	6	UCEC	1	MCF2	692	ENST00000370576	4	470	0.1555	0	0.9958	0.919	0.6715
C15orf39:474:01:ENST00000360639	6	UCEC	1	C15orf39	474	ENST00000360639	5	469	0.1566	0	0.9954	0.9263	0.6868
AKT1:17:01:ENST00000349310	9	UCEC	1	AKT1	17	ENST00000349310	9	465	0.157	0	0.9945	0.9812	0.8465
MYO16:842:01:ENST00000356711	9	STAD	1	MYO16	842	ENST00000356711	4	365	0.1586	0	0.9942	0.2898	0.1723
KAT6B:1203:01:ENST00000287239	6	LGG	1	KAT6B	1203	ENST00000287239	6	493	0.1597	2.3512	0.1455	0.9145	0.6626
DDX17:504:06:ENST00000403230	4	SKCM	6	DDX17	504	ENST00000403230	4	416	0.16	2.7544	0.084	0.984	0.8533
RYR2:4063:01:ENST00000366574	4	COAD	1	RYR2	4063	ENST00000366574	4	338	0.1609	0	0.9954	0.9742	0.8179
RAI1:799:01:ENST00000353383	4	UCEC	1	RAI1	799	ENST00000353383	4	470	0.1612	3.2689	0.0985	0.9693	0.797
TP53:175:01:ENST00000269305	9	UCEC	1	TP53	175	ENST00000269305	8	466	0.1613	2.5129	0.1178	0.9947	0.9192
TP53:172:01:ENST00000269305	4	LUSC	1	TP53	172	ENST00000269305	4	460	0.1617	0	0.991	0.5541	0.3239
MUC16:11642:01:ENST00000397910	10	UCEC	1	MUC16	11642	ENST00000397910	5	469	0.1627	0	0.9955	0.4026	0.1402
TP53:151:01:ENST00000269305	5	HNSC	1	TP53	151	ENST00000269305	5	470	0.1632	2.081	0.1474	0.7679	0.4201
PIK3CA:1043:01:ENST00000263967	4	LGG	1	PIK3CA	1043	ENST00000263967	4	495	0.1639	0	0.9952	0.9861	0.8606
TP53:245:01:ENST00000269305	6	LGG	1	TP53	245	ENST00000269305	6	493	0.1648	0.3824	0.3388	0.5667	0.2562
TP53:271:01:ENST00000269305	4	LUSC	1	TP53	271	ENST00000269305	4	460	0.1685	0.3501	0.2959	0.9031	0.6381
TP53:237:01:ENST00000269305	5	OV	1	TP53	237	ENST00000269305	5	405	0.169	2.2625	0.1072	0.9326	0.6923
PIK3R1:642:01:ENST00000521381	7	UCEC	1	PIK3R1	642	ENST00000521381	5	469	0.1694	0	0.9955	0.9803	0.839
RGS7:44:06:ENST00000366565	7	SKCM	6	RGS7	44	ENST00000366565	5	415	0.1706	0.3146	0.2489	0.9315	0.7152
PTEN:323:01:ENST00000371953	13	UCEC	1	PTEN	323	ENST00000371953	11	463	0.1706	0.3456	0.2917	0.4479	0.1789
TP53:175:01:ENST00000269305	8	LGG	1	TP53	175	ENST00000269305	7	492	0.1719	0	0.9944	0.924	0.6965
KLF3:226:01:ENST00000261438	7	UCEC	1	KLF3	226	ENST00000261438	6	468	0.1726	0	0.9952	0.9856	0.8631
PIK3R1:576:01:ENST00000521381	7	UCEC	1	PIK3R1	576	ENST00000521381	7	467	0.1726	0	0.9949	0.9594	0.7691
TP53:158:01:ENST00000269305	4	GBM	1	TP53	158	ENST00000269305	4	356	0.1739	0.6023	0.3174	0.3859	0.0536
CSMD3:2314:01:ENST00000297405	4	STAD	1	CSMD3	2314	ENST00000297405	4	365	0.1749	0	0.9943	0.7252	0.4553
PLEKHA6:328:01:ENST00000272203	15	STAD	1	PLEKHA6	328	ENST00000272203	5	364	0.1772	0.3333	0.2748	0.8137	0.5004
CPS1:1305:01:ENST00000233072	4	UCEC	1	CPS1	1305	ENST00000233072	4	470	0.1786	0	0.9958	0.9818	0.8459
IPO11:807:01:ENST00000325324	11	UCEC	1	IPO11	807	ENST00000325324	11	463	0.1786	0	0.9943	0.3744	0.1919
SOX7:257:01:ENST00000304501	4	UCEC	1	SOX7	257	ENST00000304501	4	470	0.1787	0	0.9958	0.9934	0.9084
PTEN:170:01:ENST00000371953	4	UCEC	1	PTEN	170	ENST00000371953	4	470	0.179	3.0552	0.1203	0.9664	0.7873
PRKDC:3605:01:ENST00000314191	5	UCEC	1	PRKDC	3605	ENST00000314191	5	469	0.1791	0	0.9955	0.9753	0.8209
RAD51AP2:316:01:ENST00000399080	10	COAD	1	RAD51AP2	316	ENST00000399080	6	336	0.1818	0	0.9948	0.9589	0.7803
PIK3CA:38:01:ENST00000263967	12	UCEC	1	PIK3CA	38	ENST00000263967	10	464	0.1824	1.8711	0.2254	0.2287	0.0587
RIMS2:256:01:ENST00000262231	4	STAD	1	RIMS2	256	ENST00000262231	4	365	0.1827	9.0664	0.0024	0.0005	0.0183
PTEN:57:01:ENST00000371953	5	UCEC	1	PTEN	57	ENST00000371953	4	470	0.1831	2.9985	0.1259	0.954	0.7505
TP53:194:01:ENST00000269305	5	BRCA	1	TP53	194	ENST00000269305	4	939	0.1838	9.6778	0.0261	0.1651	0.1214
LARP4B:163:01:ENST00000316157	16	COAD	1	LARP4B	163	ENST00000316157	6	336	0.1848	0	0.9949	0.9943	0.9163
ARID1A:2236:01:ENST00000324856	4	UCEC	1	ARID1A	2236	ENST00000324856	4	470	0.186	0	0.9959	0.926	0.6854
KLF5:418:01:ENST00000377687	4	BLCA	1	KLF5	418	ENST00000377687	4	382	0.1862	2.5476	0.109	0.9993	0.9691
UBQLN2:525:01:ENST00000338222	5	UCEC	1	UBQLN2	525	ENST00000338222	5	469	0.1866	3.0331	0.1216	0.9898	0.8846
DHX36:193:01:ENST00000496811	5	UCEC	1	DHX36	193	ENST00000496811	4	470	0.1869	2.9522	0.131	0.6187	0.2793
RUNX1:135:03:ENST00000344691	4	LAML	3	RUNX1	135	ENST00000344691	4	114	0.187	2.1224	0.1445	0.683	0.2213
CTNNB1:35:01:ENST00000349496	4	LIHC	1	CTNNB1	35	ENST00000349496	4	345	0.1876	0	0.9947	0.9139	0.6824
TP53:285:01:ENST00000269305	4	BRCA	1	TP53	285	ENST00000269305	4	939	0.19	1.8061	0.4081	0.218	0.0413
BRAF:403:01:ENST00000288602	8	UCEC	1	BRAF	403	ENST00000288602	7	467	0.1901	0	0.995	1	0.997
TP53:273:01:ENST00000269305	22	UCEC	1	TP53	273	ENST00000269305	21	453	0.1912	1.7879	0.1716	0.999	0.9642
RARS2:6:01:ENST00000369536	6	BLCA	1	RARS2	6	ENST00000369536	5	381	0.1914	0.3312	0.2706	0.9988	0.9608
NFRKB:311:01:ENST00000446488	11	UCEC	1	NFRKB	311	ENST00000446488	8	466	0.1927	0	0.9948	0.9881	0.8768
PIK3CA:1021:01:ENST00000263967	7	UCEC	1	PIK3CA	1021	ENST00000263967	4	470	0.1934	0	0.9959	0.9997	0.9789
CNGB1:144:01:ENST00000251102	6	UCEC	1	CNGB1	144	ENST00000251102	5	469	0.1935	0	0.9955	0.9605	0.7738
DAZAP1:257:01:ENST00000233078	14	UCEC	1	DAZAP1	257	ENST00000233078	13	461	0.1941	0.3401	0.2842	0.5241	0.2332
ADAMTS3:328:01:ENST00000286657	9	UCEC	1	ADAMTS3	328	ENST00000286657	6	468	0.1947	0	0.9953	0.9743	0.8211
PRRG3:16:06:ENST00000370353	6	SKCM	6	PRRG3	16	ENST00000370353	5	415	0.1954	0.3278	0.2662	0.9786	0.8381
KRAS:12:01:ENST00000256078	67	UCEC	1	KRAS	12	ENST00000256078	65	409	0.1954	0.6544	0.2309	0.4293	0.1841
SALL4:995:01:ENST00000217086	7	UCEC	1	SALL4	995	ENST00000217086	4	470	0.1984	0	0.9959	0.9665	0.7896
KSR2:536:01:ENST00000339824	6	UCEC	1	KSR2	536	ENST00000339824	5	469	0.1992	0	0.9956	0.9873	0.8708
PHF2:492:01:ENST00000359246	10	STAD	1	PHF2	492	ENST00000359246	5	364	0.2003	0.3475	0.2922	0.9978	0.9487
NFE2L2:34:01:ENST00000397062	16	LUSC	1	NFE2L2	34	ENST00000397062	16	448	0.2011	0.6297	0.2673	0.6003	0.2906
BRAF:600:01:ENST00000288602	49	COAD	1	BRAF	600	ENST00000288602	28	314	0.2014	0.4799	0.213	0.9067	0.6638
TMEM200A:431:06:ENST00000296978	6	SKCM	6	TMEM200A	431	ENST00000296978	4	416	0.2022	0.5213	0.3612	0.5621	0.2335
PHF1:6:01:ENST00000374516	5	UCEC	1	PHF1	6	ENST00000374516	5	469	0.2025	2.8954	0.1391	0.9648	0.7935
NLRP9:7:01:ENST00000332836	4	UCEC	1	NLRP9	7	ENST00000332836	4	470	0.2034	0	0.9959	0.9868	0.868
TP53:173:01:ENST00000269305	4	BRCA	1	TP53	173	ENST00000269305	4	939	0.204	7.2359	0.05	0.2875	0.1798
AKAP7:79:01:ENST00000431975	10	UCEC	1	AKAP7	79	ENST00000431975	8	466	0.2041	0	0.9948	0.9509	0.7563
CTCF:204:01:ENST00000264010	29	UCEC	1	CTCF	204	ENST00000264010	27	447	0.2043	0.516	0.2611	0.5854	0.2861
ADAMTSL4:757:01:ENST00000271643	8	UCEC	1	ADAMTSL4	757	ENST00000271643	7	467	0.2045	0	0.9951	0.999	0.966
NFE2L2:29:01:ENST00000397062	14	LUSC	1	NFE2L2	29	ENST00000397062	14	450	0.2068	1.6468	0.1679	0.9946	0.9157
TP53:275:01:ENST00000269305	4	OV	1	TP53	275	ENST00000269305	4	406	0.2072	0.4984	0.3273	0.8405	0.5306
KRT5:492:01:ENST00000252242	6	LUSC	1	KRT5	492	ENST00000252242	6	458	0.208	0.4901	0.3163	0.7029	0.3716
SPOP:102:01:ENST00000347630	8	PRAD	1	SPOP	102	ENST00000347630	8	482	0.2084	5.9807	0.1015	0.7786	0.4612
OR4N2:41:06:ENST00000315947	7	SKCM	6	OR4N2	41	ENST00000315947	7	413	0.2084	1.8507	0.1762	0.8975	0.6247
KMT2D:647:01:ENST00000301067	6	UCEC	1	KMT2D	647	ENST00000301067	5	469	0.2091	2.83	0.1467	0.9158	0.6626
CDKN2A:153:01:ENST00000304494	4	ESCA	1	CDKN2A	153	ENST00000304494	4	173	0.2093	0.3716	0.3275	0.8318	0.5224
TP53:175:01:ENST00000269305	16	OV	1	TP53	175	ENST00000269305	15	395	0.2098	0.6107	0.2335	0.7236	0.4418
GTF2I:424:01:ENST00000573035	62	THYM	1	GTF2I	424	ENST00000573035	61	60	0.2099	0.3715	0.2265	0.6681	0.37
KCNQ5:273:06:ENST00000370398	6	SKCM	6	KCNQ5	273	ENST00000370398	4	416	0.2106	0.5278	0.3695	0.5245	0.2048
SPTLC3:97:06:ENST00000399002	10	SKCM	6	SPTLC3	97	ENST00000399002	4	416	0.2114	0.5254	0.3677	0.6341	0.294
ZNF106:482:01:ENST00000263805	10	UCEC	1	ZNF106	482	ENST00000263805	9	465	0.2132	0	0.9947	0.7688	0.4865
SPOP:131:01:ENST00000347630	14	PRAD	1	SPOP	131	ENST00000347630	14	476	0.2136	0	0.9982	0.7134	0.3962
CTNNB1:45:01:ENST00000349496	7	ACC	1	CTNNB1	45	ENST00000349496	7	84	0.2137	2.0936	0.1673	0.7732	0.45
SORL1:1581:01:ENST00000260197	9	STAD	1	SORL1	1581	ENST00000260197	4	365	0.2137	2.2637	0.1622	0.9849	0.8572
COBLL1:945:01:ENST00000392717	8	UCEC	1	COBLL1	945	ENST00000392717	5	469	0.2158	2.7814	0.1541	0.9874	0.8759
RIPPLY3:145:06:ENST00000329553	4	SKCM	6	RIPPLY3	145	ENST00000329553	4	416	0.2162	2.2993	0.1544	0.9635	0.7778
PIK3CA:111:01:ENST00000263967	5	BRCA	1	PIK3CA	111	ENST00000263967	5	938	0.2173	2.1067	0.2972	0.4412	0.1553
PPP1R26:898:01:ENST00000356818	7	COAD	1	PPP1R26	898	ENST00000356818	4	338	0.2173	0	0.9956	0.9817	0.8424
C19orf66:189:01:ENST00000253110	6	UCEC	1	C19orf66	189	ENST00000253110	6	468	0.2187	0	0.9953	0.9618	0.7843
EGFR:252:01:ENST00000275493	4	GBM	1	EGFR	252	ENST00000275493	4	356	0.2205	0.5671	0.3295	0.9503	0.7374
PTPRB:1560:06:ENST00000261266	5	SKCM	6	PTPRB	1560	ENST00000261266	4	416	0.2213	2.2596	0.162	0.9549	0.7499
TP53:152:01:ENST00000269305	5	STAD	1	TP53	152	ENST00000269305	5	364	0.2215	0.3574	0.3053	0.8868	0.6392
SF3B1:625:06:ENST00000335508	5	SKCM	6	SF3B1	625	ENST00000335508	5	415	0.2217	0.34	0.2828	0.9103	0.6747
TP53:261:01:ENST00000269305	5	STAD	1	TP53	261	ENST00000269305	5	364	0.2218	1.5838	0.3176	0.0425	0.0004
DPAGT1:233:01:ENST00000354202	7	UCEC	1	DPAGT1	233	ENST00000354202	6	468	0.2229	0	0.9953	1	0.9948
CD79B:196:01:ENST00000006750	4	DLBC	1	CD79B	196	ENST00000006750	4	30	0.2252	3.3451	0.2859	0.0324	0.0405
TP53:158:01:ENST00000269305	17	LUSC	1	TP53	158	ENST00000269305	16	448	0.2252	0.6769	0.3127	0.3541	0.1235
TP53:282:01:ENST00000269305	9	READ	1	TP53	282	ENST00000269305	8	110	0.2254	1.9962	0.2778	0.8669	0.5811
ARID4B:939:01:ENST00000264183	6	STAD	1	ARID4B	939	ENST00000264183	4	365	0.2264	2.19	0.1797	0.9457	0.7292
TP53:273:01:ENST00000269305	20	OV	1	TP53	273	ENST00000269305	19	391	0.2281	0.7233	0.2954	0.2474	0.0702
APC:1114:01:ENST00000257430	10	COAD	1	APC	1114	ENST00000257430	7	335	0.2284	0	0.9948	0.585	0.3316
TP53:278:01:ENST00000269305	4	ESCA	1	TP53	278	ENST00000269305	4	173	0.2291	0.3852	0.3442	0.9624	0.775
RAC1:159:01:ENST00000348035	6	HNSC	1	RAC1	159	ENST00000348035	5	470	0.2297	2.4445	0.1252	0.6625	0.4189
RHOB:75:01:ENST00000272233	6	BLCA	1	RHOB	75	ENST00000272233	6	380	0.23	1.6836	0.2522	0.5586	0.2145
PCDHGB4:137:06:ENST00000519479	4	SKCM	6	PCDHGB4	137	ENST00000519479	4	416	0.2313	0.3717	0.3239	0.9992	0.9687
ESRP1:512:01:ENST00000433389	21	UCEC	1	ESRP1	512	ENST00000433389	20	454	0.2327	0.3089	0.243	0.2974	0.142
KLF5:419:01:ENST00000377687	5	LUSC	1	KLF5	419	ENST00000377687	4	460	0.2335	0.3855	0.342	0.9745	0.8161
EGFR:222:01:ENST00000275493	6	GBM	1	EGFR	222	ENST00000275493	5	355	0.2337	1.8099	0.1904	0.677	0.2133
MEGF6:1440:01:ENST00000356575	4	UCEC	1	MEGF6	1440	ENST00000356575	4	470	0.2344	0	0.996	0.9552	0.7565
KCNB2:146:01:ENST00000523207	8	UCEC	1	KCNB2	146	ENST00000523207	7	467	0.2346	2.9217	0.1367	0.2904	0.1643
PIK3CA:542:01:ENST00000263967	41	BRCA	1	PIK3CA	542	ENST00000263967	38	905	0.2347	0.594	0.3056	0.6669	0.3572
TP53:280:01:ENST00000269305	15	BLCA	1	TP53	280	ENST00000269305	13	373	0.2348	0.5728	0.2709	0.8551	0.5866
TP53:234:01:ENST00000269305	5	OV	1	TP53	234	ENST00000269305	5	405	0.2354	0.3219	0.2592	0.8426	0.5773
PTEN:16:01:ENST00000371953	4	UCEC	1	PTEN	16	ENST00000371953	4	470	0.2359	0	0.996	0.971	0.8041
TP53:193:01:ENST00000269305	5	OV	1	TP53	193	ENST00000269305	5	405	0.236	0.5883	0.3618	0.8908	0.6123
USP47:1020:01:ENST00000399455	4	UCEC	1	USP47	1020	ENST00000399455	4	470	0.2362	0	0.996	0.9998	0.9839
TP53:179:01:ENST00000269305	10	LUSC	1	TP53	179	ENST00000269305	9	455	0.2363	0.5566	0.3144	0.9049	0.6455
ING1:339:01:ENST00000375774	4	UCEC	1	ING1	339	ENST00000375774	4	470	0.2369	0	0.996	0.9991	0.9659
KRAS:12:01:ENST00000256078	7	TGCT	1	KRAS	12	ENST00000256078	7	121	0.2387	7.7766	0.0941	0.9023	0.6595
CDKN2A:110:01:ENST00000304494	9	HNSC	1	CDKN2A	110	ENST00000304494	8	467	0.2389	1.804	0.194	0.8688	0.5781
TP53:175:01:ENST00000269305	13	READ	1	TP53	175	ENST00000269305	12	106	0.2391	2.403	0.1693	0.8126	0.5318
KCNB1:736:01:ENST00000371741	5	UCEC	1	KCNB1	736	ENST00000371741	4	470	0.2399	0	0.996	0.9979	0.9485
CAMSAP2:1437:01:ENST00000236925	14	UCEC	1	CAMSAP2	1437	ENST00000236925	13	461	0.2401	0.3594	0.3098	0.84	0.5441
IKZF5:5:01:ENST00000368886	5	UCEC	1	IKZF5	5	ENST00000368886	4	470	0.2404	0	0.996	0.656	0.326
TP53:187:01:ENST00000269305	11	OV	1	TP53	187	ENST00000269305	10	400	0.2417	1.869	0.1316	0.7559	0.4833
FBXW7:505:01:ENST00000281708	14	UCEC	1	FBXW7	505	ENST00000281708	12	462	0.2425	0.3702	0.3236	0.7718	0.4571
APC:213:01:ENST00000257430	13	COAD	1	APC	213	ENST00000257430	12	330	0.2433	0.3432	0.2884	0.9223	0.6941
CTNNB1:33:01:ENST00000349496	27	UCEC	1	CTNNB1	33	ENST00000349496	26	448	0.2433	0.4431	0.2557	0.6533	0.3709
ZBTB20:692:01:ENST00000474710	20	UCEC	1	ZBTB20	692	ENST00000474710	18	456	0.2434	0.4869	0.3152	0.7865	0.4771
TP53:280:01:ENST00000269305	4	LGG	1	TP53	280	ENST00000269305	4	495	0.244	1.7011	0.3661	0.1475	0.0162
ACVR2A:437:01:ENST00000241416	25	UCEC	1	ACVR2A	437	ENST00000241416	23	451	0.2452	0.5516	0.314	0.672	0.3592
TP53:157:01:ENST00000269305	5	LUAD	1	TP53	157	ENST00000269305	5	474	0.2468	0.5579	0.4126	0.1425	0.0236
NFE2L2:29:01:ENST00000397062	4	HNSC	1	NFE2L2	29	ENST00000397062	4	471	0.2482	2.1493	0.1889	0.9158	0.6547
ASXL3:1370:06:ENST00000269197	7	SKCM	6	ASXL3	1370	ENST00000269197	6	414	0.2483	1.9542	0.186	0.9931	0.9052
FBXW7:465:01:ENST00000281708	7	UCS	1	FBXW7	465	ENST00000281708	7	45	0.2486	1.9716	0.1746	0.5044	0.3016
TP53:248:01:ENST00000269305	11	LUSC	1	TP53	248	ENST00000269305	10	454	0.2487	1.9316	0.1472	0.5873	0.34
TP53:248:01:ENST00000269305	8	BRCA	1	TP53	248	ENST00000269305	8	935	0.2526	2.6894	0.1662	0.9716	0.8115
TTN:3271:06:ENST00000591111	5	SKCM	6	TTN	3271	ENST00000591111	4	416	0.2526	0.383	0.3388	0.9904	0.8913
PAX6:375:01:ENST00000241001	9	UCEC	1	PAX6	375	ENST00000241001	9	465	0.2531	0	0.9949	0.6447	0.3741
RHOA:42:01:ENST00000418115	5	STAD	1	RHOA	42	ENST00000418115	5	364	0.2533	2.2739	0.1602	0.7488	0.4896
XYLT2:529:01:ENST00000017003	18	UCEC	1	XYLT2	529	ENST00000017003	17	457	0.2541	0.4971	0.3294	0.6347	0.3231
TP53:220:01:ENST00000269305	5	GBM	1	TP53	220	ENST00000269305	5	355	0.2559	0.5656	0.327	0.8938	0.6548
CCT8L2:552:01:ENST00000359963	6	UCEC	1	CCT8L2	552	ENST00000359963	4	470	0.2568	0	0.996	0.9955	0.9229
EPHA2:460:01:ENST00000358432	10	UCEC	1	EPHA2	460	ENST00000358432	10	464	0.257	0	0.9948	0.4255	0.2237
EGFR:289:01:ENST00000275493	4	LGG	1	EGFR	289	ENST00000275493	4	495	0.2576	2.4449	0.2112	0.875	0.5841
RGPD3:755:06:ENST00000409886	5	SKCM	6	RGPD3	755	ENST00000409886	4	416	0.2601	0	0.9918	0.2147	0.1345
CARD10:527:01:ENST00000251973	5	UCEC	1	CARD10	527	ENST00000251973	5	469	0.2603	2.4452	0.2125	0.9942	0.9125
TP53:213:01:ENST00000269305	6	BRCA	1	TP53	213	ENST00000269305	6	937	0.2608	0	0.9936	0.988	0.8784
LNPEP:145:01:ENST00000231368	6	STAD	1	LNPEP	145	ENST00000231368	4	365	0.2608	2.0164	0.2295	0.8554	0.5436
OR5B17:215:06:ENST00000357377	8	SKCM	6	OR5B17	215	ENST00000357377	6	414	0.2617	1.9074	0.2023	0.9971	0.9382
CNTNAP2:362:06:ENST00000361727	8	SKCM	6	CNTNAP2	362	ENST00000361727	4	416	0.2639	0.3894	0.3471	0.9737	0.8216
GABRE:298:06:ENST00000370328	6	SKCM	6	GABRE	298	ENST00000370328	5	415	0.2666	1.7564	0.2658	0.6801	0.322
PIK3R1:464:01:ENST00000521381	5	UCEC	1	PIK3R1	464	ENST00000521381	4	470	0.267	2.006	0.3413	0.3139	0.0813
EIF3J:61:01:ENST00000261868	5	UCEC	1	EIF3J	61	ENST00000261868	4	470	0.2681	0	0.9939	0.9818	0.8511
AREG:134:06:ENST00000395748	4	SKCM	6	AREG	134	ENST00000395748	4	416	0.2696	2.0329	0.224	0.9387	0.707
CHAMP1:85:01:ENST00000361283	4	OV	1	CHAMP1	85	ENST00000361283	4	406	0.271	5.4804	0.0178	0.0268	0.0602
ST8SIA6:252:01:ENST00000377602	20	STAD	1	ST8SIA6	252	ENST00000377602	9	360	0.2723	0.5776	0.3475	0.8133	0.5037
GIMAP8:654:06:ENST00000307271	7	SKCM	6	GIMAP8	654	ENST00000307271	5	415	0.2724	0.5372	0.3823	0.8815	0.5995
NFE2L2:82:01:ENST00000397062	5	UCEC	1	NFE2L2	82	ENST00000397062	5	469	0.2729	2.3891	0.2241	0.843	0.5382
GAS2L2:409:01:ENST00000604641	5	UCEC	1	GAS2L2	409	ENST00000604641	5	469	0.2752	0	0.9957	0.9295	0.6939
NRAS:61:01:ENST00000369535	7	COAD	1	NRAS	61	ENST00000369535	6	336	0.2768	2.568	0.191	0.2585	0.1518
PTEN:343:01:ENST00000371953	5	UCEC	1	PTEN	343	ENST00000371953	5	469	0.2771	0	0.9957	0.9649	0.7845
RPL22:15:01:ENST00000234875	25	STAD	1	RPL22	15	ENST00000234875	5	364	0.2779	1.6723	0.3109	0.4812	0.159
PIK3CA:118:01:ENST00000263967	10	UCEC	1	PIK3CA	118	ENST00000263967	9	465	0.2784	1.9304	0.2641	0.9883	0.8767
TP53:306:01:ENST00000269305	4	OV	1	TP53	306	ENST00000269305	4	406	0.2788	1.6829	0.3025	0.4476	0.0739
TP53:307:01:ENST00000269305	5	LUSC	1	TP53	307	ENST00000269305	5	459	0.279	0.6455	0.4532	0.2027	0.0372
TTC3:779:01:ENST00000354749	5	UCEC	1	TTC3	779	ENST00000354749	5	469	0.2804	2.3334	0.2375	0.9948	0.9201
PREX2:1404:06:ENST00000288368	5	SKCM	6	PREX2	1404	ENST00000288368	4	416	0.2807	0.3981	0.3587	0.9978	0.9471
STK11:53:01:ENST00000326873	6	LUAD	1	STK11	53	ENST00000326873	6	473	0.2813	2.1714	0.1845	0.9144	0.6843
TTN:13056:06:ENST00000591111	4	SKCM	6	TTN	13056	ENST00000591111	4	416	0.2818	1.9841	0.2396	0.8751	0.5777
CDKN2A:80:01:ENST00000304494	6	PAAD	1	CDKN2A	80	ENST00000304494	6	170	0.2823	1.9809	0.183	0.7957	0.5332
UPF3A:267:01:ENST00000375299	10	STAD	1	UPF3A	267	ENST00000375299	4	365	0.2827	3.5691	0.0763	0.0462	0.0734
ZMYM2:1250:01:ENST00000382871	4	UCEC	1	ZMYM2	1250	ENST00000382871	4	470	0.283	1.7603	0.4374	0.3027	0.0755
ARFGAP1:295:01:ENST00000370283	5	UCEC	1	ARFGAP1	295	ENST00000370283	4	470	0.2838	6.0327	0.0772	0.0189	0.0376
KCNH4:215:01:ENST00000264661	5	UCEC	1	KCNH4	215	ENST00000264661	5	469	0.2842	0	0.9958	0.9915	0.8968
TSPAN19:43:01:ENST00000532498	4	UCEC	1	TSPAN19	43	ENST00000532498	4	470	0.2844	0	0.9939	0.8987	0.6313
MAPK1:322:01:ENST00000215832	7	HNSC	1	MAPK1	322	ENST00000215832	7	468	0.2848	0.3463	0.2902	0.4925	0.2741
AHDC1:586:01:ENST00000247087	5	UCEC	1	AHDC1	586	ENST00000247087	4	470	0.2854	5.7833	0.0852	0.0009	0.0122
RAE1:351:01:ENST00000371242	4	UCEC	1	RAE1	351	ENST00000371242	4	470	0.2857	0	0.9939	0.9867	0.8682
SF3B1:700:01:ENST00000335508	8	BRCA	1	SF3B1	700	ENST00000335508	8	935	0.2858	0	0.9932	0.8517	0.5848
TP53:176:01:ENST00000269305	5	COAD	1	TP53	176	ENST00000269305	5	337	0.2861	2.451	0.2124	0.9368	0.7264
ZDBF2:1063:06:ENST00000374423	5	SKCM	6	ZDBF2	1063	ENST00000374423	4	416	0.2861	0.401	0.3624	0.9365	0.7268
LARP4B:163:01:ENST00000316157	9	UCEC	1	LARP4B	163	ENST00000316157	7	467	0.2867	2.4393	0.2207	0.971	0.8118
GLI1:274:01:ENST00000228682	7	COAD	1	GLI1	274	ENST00000228682	5	337	0.2888	0	0.9955	0.8947	0.6502
CTNNB1:34:01:ENST00000349496	14	UCEC	1	CTNNB1	34	ENST00000349496	14	460	0.2893	0.3714	0.3258	0.7437	0.4272
NHS:1199:01:ENST00000380060	4	UCEC	1	NHS	1199	ENST00000380060	4	470	0.2897	0	0.9939	0.9393	0.7167
CCDC15:194:01:ENST00000344762	6	UCEC	1	CCDC15	194	ENST00000344762	6	468	0.2898	2.3165	0.2411	1	0.9973
WDFY3:1916:01:ENST00000295888	5	UCEC	1	WDFY3	1916	ENST00000295888	4	470	0.291	0	0.994	0.9995	0.9759
GPR83:379:06:ENST00000243673	4	SKCM	6	GPR83	379	ENST00000243673	4	416	0.2914	1.9505	0.2515	0.902	0.6265
CTNNB1:32:01:ENST00000349496	16	UCEC	1	CTNNB1	32	ENST00000349496	14	460	0.2917	0.3739	0.3284	0.8017	0.5195
CCDC102B:367:06:ENST00000319445	4	SKCM	6	CCDC102B	367	ENST00000319445	4	416	0.2939	0.6646	0.4863	0.166	0.0211
CIC:201:01:ENST00000575354	4	LGG	1	CIC	201	ENST00000575354	4	495	0.294	0.499	0.494	0.9456	0.7324
TP53:282:01:ENST00000269305	11	COAD	1	TP53	282	ENST00000269305	11	331	0.2943	2.2532	0.1717	0.0186	0.0181
USP9X:28:01:ENST00000324545	7	UCEC	1	USP9X	28	ENST00000324545	7	467	0.295	2.3372	0.2362	0.8125	0.5398
TAF1L:665:01:ENST00000242310	4	UCEC	1	TAF1L	665	ENST00000242310	4	470	0.2953	4.6464	0.1298	0.0714	0.0728
PIK3CA:545:01:ENST00000263967	11	STAD	1	PIK3CA	545	ENST00000263967	9	360	0.2956	0.4915	0.3186	0.5476	0.3067
CNOT2:NA:01:ENST00000229195	6	UCEC	1	CNOT2	NA	ENST00000229195	5	469	0.2967	0	0.9958	0.9209	0.6916
LDLRAP1:202:01:ENST00000374338	9	UCEC	1	LDLRAP1	202	ENST00000374338	8	466	0.2975	2.591	0.185	0.2216	0.126
TP53:271:01:ENST00000269305	6	BLCA	1	TP53	271	ENST00000269305	4	382	0.2984	1.9424	0.2551	0.7155	0.3595
TP53:282:01:ENST00000269305	5	OV	1	TP53	282	ENST00000269305	5	405	0.2989	2.4369	0.128	0.8026	0.5413
TP53:220:01:ENST00000269305	10	BRCA	1	TP53	220	ENST00000269305	10	933	0.299	0.6181	0.5038	0.1528	0.033
DAZAP1:257:01:ENST00000233078	10	STAD	1	DAZAP1	257	ENST00000233078	4	365	0.2992	0.421	0.3887	0.9926	0.9053
ADD3:701:01:ENST00000356080	9	UCEC	1	ADD3	701	ENST00000356080	6	468	0.2993	2.3224	0.2459	0.95	0.7424
PIK3CA:542:01:ENST00000263967	4	LUAD	1	PIK3CA	542	ENST00000263967	4	475	0.2995	2.7546	0.1563	0.7836	0.5213
CNTN5:379:06:ENST00000524871	7	SKCM	6	CNTN5	379	ENST00000524871	5	415	0.2997	0.5524	0.4039	0.8971	0.627
EGFR:598:01:ENST00000275493	14	GBM	1	EGFR	598	ENST00000275493	13	347	0.3005	0.7478	0.3681	0.9189	0.6699
GATA3:335:01:ENST00000346208	12	BRCA	1	GATA3	335	ENST00000346208	12	931	0.301	2.9979	0.1252	0.1195	0.0663
CPVL:418:01:ENST00000265394	4	UCEC	1	CPVL	418	ENST00000265394	4	470	0.3023	0	0.994	0.9828	0.8495
TP53:248:01:ENST00000269305	5	LIHC	1	TP53	248	ENST00000269305	5	344	0.3031	0	0.995	0.22	0.1287
CD93:121:01:ENST00000246006	7	UCEC	1	CD93	121	ENST00000246006	7	467	0.3033	0	0.9954	0.843	0.5733
MROH2B:1426:01:ENST00000399564	5	UCEC	1	MROH2B	1426	ENST00000399564	4	470	0.3052	3.9641	0.1721	0.0526	0.0622
KRT28:256:01:ENST00000306658	5	UCEC	1	KRT28	256	ENST00000306658	4	470	0.3073	3.9641	0.1733	0.172	0.1235
CARD11:555:01:ENST00000396946	6	UCEC	1	CARD11	555	ENST00000396946	4	470	0.3075	3.9867	0.1736	0.0488	0.0596
FUBP3:395:01:ENST00000319725	5	UCEC	1	FUBP3	395	ENST00000319725	5	469	0.3078	2.163	0.2816	0.9226	0.6767
USP47:1121:01:ENST00000399455	4	UCEC	1	USP47	1121	ENST00000399455	4	470	0.3084	0	0.994	0.9215	0.6967
KANSL1:204:01:ENST00000574590	6	UCEC	1	KANSL1	204	ENST00000574590	6	468	0.3092	0	0.9956	0.8635	0.6013
TP53:213:01:ENST00000269305	4	ESCA	1	TP53	213	ENST00000269305	4	173	0.3096	1.7863	0.3273	0.6559	0.2993
OR4A15:183:06:ENST00000314706	4	SKCM	6	OR4A15	183	ENST00000314706	4	416	0.3105	1.8895	0.275	0.8162	0.4845
TP53:187:01:ENST00000269305	4	SARC	1	TP53	187	ENST00000269305	4	221	0.3113	0.4337	0.4069	0.9326	0.7043
TTN:11301:01:ENST00000591111	4	UCEC	1	TTN	11301	ENST00000591111	4	470	0.3113	0	0.994	0.9856	0.8619
EPB41L5:268:01:ENST00000263713	4	UCEC	1	EPB41L5	268	ENST00000263713	4	470	0.3125	3.7859	0.1891	0.1698	0.1233
TP53:245:01:ENST00000269305	4	UCEC	1	TP53	245	ENST00000269305	4	470	0.3126	0	0.994	0.9214	0.6758
HNRNPL:337:01:ENST00000221419	9	COAD	1	HNRNPL	337	ENST00000221419	5	337	0.3127	0	0.9955	0.782	0.5075
MAGEC1:1046:01:ENST00000285879	5	COAD	1	MAGEC1	1046	ENST00000285879	4	338	0.313	0	0.9958	0.9916	0.9015
TP53:126:01:ENST00000269305	7	BRCA	1	TP53	126	ENST00000269305	7	936	0.3132	2.0688	0.3102	0.9991	0.9707
UBQLN2:525:01:ENST00000338222	10	COAD	1	UBQLN2	525	ENST00000338222	5	337	0.3138	2.316	0.2429	0.9998	0.9813
CDKN2A:51:01:ENST00000304494	4	HNSC	1	CDKN2A	51	ENST00000304494	4	471	0.3138	3.191	0.104	0.0107	0.0436
GAS2:312:01:ENST00000278187	8	UCEC	1	GAS2	312	ENST00000278187	4	470	0.314	0	0.994	0.9788	0.8368
IQSEC2:283:01:ENST00000396435	9	UCEC	1	IQSEC2	283	ENST00000396435	8	466	0.3143	0	0.9953	0.6423	0.373
MAP2:1474:01:ENST00000360351	8	UCEC	1	MAP2	1474	ENST00000360351	7	467	0.3144	0	0.9954	0.4983	0.2742
HDAC4:746:01:ENST00000345617	4	THYM	1	HDAC4	746	ENST00000345617	4	117	0.3145	0	0.9983	0.9533	0.7632
ZNF106:482:01:ENST00000263805	11	STAD	1	ZNF106	482	ENST00000263805	4	365	0.3152	1.8135	0.3078	0.8346	0.5113
KRT16:66:01:ENST00000301653	5	UCEC	1	KRT16	66	ENST00000301653	4	470	0.3153	3.6875	0.1975	0.1822	0.1294
PTEN:268:01:ENST00000371953	9	UCEC	1	PTEN	268	ENST00000371953	8	466	0.3156	0	0.9953	0.6242	0.3598
CELSR1:614:01:ENST00000262738	9	UCEC	1	CELSR1	614	ENST00000262738	8	466	0.3162	0.4389	0.4142	0.5047	0.2121
VHL:114:01:ENST00000256474	7	KIRC	1	VHL	114	ENST00000256474	7	323	0.3165	1.7964	0.3207	0.916	0.6655
NOL4L:133:01:ENST00000359676	10	COAD	1	NOL4L	133	ENST00000359676	5	337	0.3178	0	0.9956	0.9496	0.7518
STAMBPL1:405:01:ENST00000371924	10	STAD	1	STAMBPL1	405	ENST00000371924	4	365	0.3182	0.4299	0.4004	0.852	0.5517
DOCK3:1852:01:ENST00000266037	16	COAD	1	DOCK3	1852	ENST00000266037	7	335	0.3185	0	0.9952	0.3889	0.2079
BOD1L1:570:01:ENST00000040738	4	UCEC	1	BOD1L1	570	ENST00000040738	4	470	0.3189	0	0.994	0.98	0.8434
ADAM30:282:01:ENST00000369400	5	COAD	1	ADAM30	282	ENST00000369400	4	338	0.3195	0	0.9959	0.9732	0.8226
BTBD11:453:01:ENST00000280758	8	UCEC	1	BTBD11	453	ENST00000280758	7	467	0.3221	0	0.9954	0.9452	0.7407
DHX15:30:01:ENST00000336812	6	UCEC	1	DHX15	30	ENST00000336812	6	468	0.3227	0	0.9956	0.8935	0.6469
MYRF:264:01:ENST00000278836	6	UCEC	1	MYRF	264	ENST00000278836	4	470	0.3249	3.401	0.2256	0.1019	0.0892
OR4S2:120:06:ENST00000312422	4	SKCM	6	OR4S2	120	ENST00000312422	4	416	0.3253	0.5883	0.4584	0.7254	0.3846
PCDH15:764:06:ENST00000320301	5	SKCM	6	PCDH15	764	ENST00000320301	4	416	0.3258	0.4215	0.3894	0.9863	0.8702
SEL1L3:131:01:ENST00000399878	7	COAD	1	SEL1L3	131	ENST00000399878	6	336	0.3259	0	0.9954	0.6873	0.4159
DCHS1:235:01:ENST00000299441	4	UCEC	1	DCHS1	235	ENST00000299441	4	470	0.3262	3.3889	0.2286	0.225	0.1497
TP53:282:01:ENST00000269305	5	ESCA	1	TP53	282	ENST00000269305	4	173	0.3266	2.7096	0.1679	0.6373	0.3953
COL21A1:701:06:ENST00000244728	5	SKCM	6	COL21A1	701	ENST00000244728	4	416	0.3286	0	0.9924	0.078	0.0668
PIK3CA:345:01:ENST00000263967	16	BRCA	1	PIK3CA	345	ENST00000263967	16	927	0.3294	1.5863	0.3649	0.4936	0.2111
NFE2L2:31:01:ENST00000397062	7	LUSC	1	NFE2L2	31	ENST00000397062	6	458	0.3296	0.555	0.4083	0.9478	0.7366
UBB:191:01:ENST00000302182	7	UCEC	1	UBB	191	ENST00000302182	6	468	0.3302	0	0.9956	0.737	0.458
RP1:1282:06:ENST00000220676	4	SKCM	6	RP1	1282	ENST00000220676	4	416	0.3307	1.8319	0.2998	0.8925	0.6084
TP53:236:01:ENST00000269305	5	HNSC	1	TP53	236	ENST00000269305	4	471	0.3325	0.4342	0.4062	0.984	0.8547
EPAS1:531:01:ENST00000263734	4	PCPG	1	EPAS1	531	ENST00000263734	4	175	0.3327	0	0.999	0.0322	0.0376
PLOD3:297:01:ENST00000223127	5	UCEC	1	PLOD3	297	ENST00000223127	4	470	0.3327	0	0.9941	0.9026	0.6621
ANXA13:151:01:ENST00000419625	4	UCEC	1	ANXA13	151	ENST00000419625	4	470	0.3332	3.2263	0.2469	0.3164	0.1944
TP53:220:01:ENST00000269305	10	LGG	1	TP53	220	ENST00000269305	9	490	0.334	0.4145	0.3808	0.9997	0.982
FBXW7:465:01:ENST00000281708	11	STAD	1	FBXW7	465	ENST00000281708	5	364	0.3341	0.4101	0.3744	0.9615	0.7855
PIK3R1:577:01:ENST00000521381	5	UCEC	1	PIK3R1	577	ENST00000521381	5	469	0.3341	0	0.9959	0.982	0.8487
APC:1408:01:ENST00000257430	6	COAD	1	APC	1408	ENST00000257430	4	338	0.3349	2.0181	0.3305	0.5468	0.2219
NEIL1:191:01:ENST00000355059	5	UCEC	1	NEIL1	191	ENST00000355059	4	470	0.3352	0	0.9941	0.9748	0.8247
TP53:192:01:ENST00000269305	4	BLCA	1	TP53	192	ENST00000269305	4	382	0.3356	0.4274	0.3968	0.9701	0.8105
EPG5:1902:01:ENST00000282041	9	STAD	1	EPG5	1902	ENST00000282041	5	364	0.3357	1.9055	0.2698	0.926	0.7092
APC:213:01:ENST00000257430	6	READ	1	APC	213	ENST00000257430	6	112	0.3367	2.1202	0.3202	0.9581	0.7623
FBXW7:423:01:ENST00000281708	8	UCEC	1	FBXW7	423	ENST00000281708	8	466	0.3368	2.2304	0.2631	0.5699	0.3252
RP1L1:284:01:ENST00000382483	5	UCEC	1	RP1L1	284	ENST00000382483	4	470	0.3372	0	0.9941	0.9007	0.6606
ZBTB20:692:01:ENST00000474710	30	STAD	1	ZBTB20	692	ENST00000474710	9	360	0.3379	0.6742	0.4378	0.3363	0.1068
FOXM1:671:01:ENST00000359843	6	UCEC	1	FOXM1	671	ENST00000359843	6	468	0.3392	0	0.9956	0.7247	0.4489
MAP2K1:124:01:ENST00000307102	5	SKCM	1	MAP2K1	124	ENST00000307102	5	415	0.3411	3.9222	0.0577	0.0087	0.0272
RNF43:659:01:ENST00000407977	22	STAD	1	RNF43	659	ENST00000407977	8	361	0.3411	0.626	0.4224	0.9555	0.7595
NRIP1:516:01:ENST00000318948	5	UCEC	1	NRIP1	516	ENST00000318948	5	469	0.3415	1.9891	0.3374	0.5824	0.2566
GRIK4:604:01:ENST00000438375	4	UCEC	1	GRIK4	604	ENST00000438375	4	470	0.3422	3.048	0.2686	0.2942	0.1849
TP53:154:01:ENST00000269305	7	LUSC	1	TP53	154	ENST00000269305	7	457	0.3426	0.5445	0.3928	0.9915	0.8958
TP53:157:01:ENST00000269305	4	HNSC	1	TP53	157	ENST00000269305	4	471	0.3433	0.4415	0.415	0.9028	0.6372
TP53:331:01:ENST00000269305	5	LUAD	1	TP53	331	ENST00000269305	5	474	0.3444	0.4379	0.4106	0.9961	0.9286
TP53:175:01:ENST00000269305	7	GBM	1	TP53	175	ENST00000269305	4	356	0.3455	0.3831	0.3384	0.0231	0.0405
APC:302:01:ENST00000257430	5	COAD	1	APC	302	ENST00000257430	5	337	0.3464	2.1564	0.2847	1	0.9989
ASXL2:330:01:ENST00000435504	4	BLCA	1	ASXL2	330	ENST00000435504	4	382	0.3467	2.9213	0.134	0.062	0.0839
TP53:245:01:ENST00000269305	14	LUSC	1	TP53	245	ENST00000269305	14	450	0.349	0.68	0.3949	0.9746	0.8174
FGFR2:382:01:ENST00000358487	6	UCEC	1	FGFR2	382	ENST00000358487	6	468	0.3496	0	0.9957	0.7608	0.4826
C3orf70:6:01:ENST00000335012	9	BLCA	1	C3orf70	6	ENST00000335012	7	379	0.3503	0.5387	0.385	0.9964	0.932
TP53:273:01:ENST00000269305	4	UCS	1	TP53	273	ENST00000269305	4	48	0.3507	0	0.9968	0	0.0001
TP53:163:01:ENST00000269305	9	OV	1	TP53	163	ENST00000269305	9	401	0.3526	1.7526	0.2154	0.4673	0.2689
PROX2:301:06:ENST00000556489	5	SKCM	6	PROX2	301	ENST00000556489	4	416	0.3527	1.7727	0.3263	0.8383	0.517
SMURF2:427:06:ENST00000262435	6	SKCM	6	SMURF2	427	ENST00000262435	4	416	0.3527	1.4886	0.4315	0.226	0.0151
RQCD1:131:06:ENST00000273064	9	SKCM	6	RQCD1	131	ENST00000273064	7	413	0.3529	0.6365	0.4381	0.8905	0.6176
NFASC:165:01:ENST00000339876	12	COAD	1	NFASC	165	ENST00000339876	7	335	0.3547	0	0.9953	0.2235	0.1224
APC:1414:01:ENST00000257430	7	COAD	1	APC	1414	ENST00000257430	6	336	0.3552	0.4625	0.4446	0.5061	0.2119
DDX17:121:01:ENST00000403230	4	UCEC	1	DDX17	121	ENST00000403230	4	470	0.3558	2.857	0.2987	0.3395	0.2078
PIK3CA:1047:01:ENST00000263967	8	BLCA	1	PIK3CA	1047	ENST00000263967	7	379	0.3563	0.6388	0.4419	0.7279	0.3981
ZMIZ1:1051:01:ENST00000334512	6	UCEC	1	ZMIZ1	1051	ENST00000334512	5	469	0.3565	1.9	0.3708	0.8653	0.5721
TP53:273:01:ENST00000269305	5	PAAD	1	TP53	273	ENST00000269305	5	171	0.3569	0.5561	0.4122	0.9246	0.7026
VPS13A:372:01:ENST00000360280	5	UCEC	1	VPS13A	372	ENST00000360280	4	470	0.3569	2.8427	0.3009	0.4057	0.243
PIK3CA:546:01:ENST00000263967	11	BRCA	1	PIK3CA	546	ENST00000263967	11	932	0.3573	0.4634	0.4461	0.7844	0.4709
GNAZ:205:01:ENST00000615612	9	UCEC	1	GNAZ	205	ENST00000615612	8	466	0.3573	0	0.9954	0.7428	0.4611
CSMD3:334:06:ENST00000297405	4	SKCM	6	CSMD3	334	ENST00000297405	4	416	0.3576	0.4397	0.4129	0.8532	0.5942
OR7E24:168:01:ENST00000456448	5	STAD	1	OR7E24	168	ENST00000456448	4	365	0.3579	1.6912	0.3683	0.811	0.4771
DPYD:204:06:ENST00000370192	5	SKCM	6	DPYD	204	ENST00000370192	5	415	0.3592	0.6772	0.5034	0.4211	0.1367
ALG13:290:01:ENST00000394780	5	UCEC	1	ALG13	290	ENST00000394780	5	469	0.3595	0	0.9959	0.7093	0.3807
PTEN:290:01:ENST00000371953	6	UCEC	1	PTEN	290	ENST00000371953	6	468	0.3604	0	0.9957	0.8784	0.6226
CIC:1515:01:ENST00000575354	4	LGG	1	CIC	1515	ENST00000575354	4	495	0.3606	0	0.994	0.8536	0.5932
CTNNB1:37:01:ENST00000349496	21	UCEC	1	CTNNB1	37	ENST00000349496	19	455	0.361	1.5189	0.366	0.962	0.7775
PIK3CA:542:01:ENST00000263967	13	COAD	1	PIK3CA	542	ENST00000263967	10	332	0.3611	0.4173	0.3856	0.9961	0.9335
DDX39B:149:01:ENST00000396172	9	STAD	1	DDX39B	149	ENST00000396172	4	365	0.3617	0.4512	0.428	0.8525	0.553
ERBB2:755:01:ENST00000269571	7	BRCA	1	ERBB2	755	ENST00000269571	6	937	0.3621	3.8856	0.18	0.3505	0.1967
THSD7B:305:06:ENST00000272643	5	SKCM	6	THSD7B	305	ENST00000272643	5	415	0.3643	1.4049	0.4544	0.1334	0.0048
TCF4:647:01:ENST00000356073	4	UCEC	1	TCF4	647	ENST00000356073	4	470	0.3646	0	0.9942	0.9962	0.9312
OSGIN1:39:01:ENST00000343939	4	THYM	1	OSGIN1	39	ENST00000343939	4	117	0.3667	2.8188	0.3485	0.9595	0.7679
ATF5:37:01:ENST00000423777	7	UCEC	1	ATF5	37	ENST00000423777	4	470	0.367	0	0.9942	0.9932	0.906
TP53:193:01:ENST00000269305	5	LUAD	1	TP53	193	ENST00000269305	5	474	0.3686	0	0.9927	0.1275	0.0854
TP53:282:01:ENST00000269305	5	PAAD	1	TP53	282	ENST00000269305	5	171	0.3688	1.6331	0.3402	0.9177	0.6597
KRAS:13:01:ENST00000256078	12	STAD	1	KRAS	13	ENST00000256078	6	363	0.3691	1.9294	0.2607	0.5215	0.3109
HTR2C:371:01:ENST00000276198	6	UCEC	1	HTR2C	371	ENST00000276198	4	470	0.3696	0	0.9942	0.9537	0.7617
LCP2:454:01:ENST00000046794	6	UCEC	1	LCP2	454	ENST00000046794	5	469	0.3708	0	0.996	0.8556	0.5927
SRPR:170:01:ENST00000332118	7	UCEC	1	SRPR	170	ENST00000332118	5	469	0.371	0	0.996	0.7815	0.5065
PPP2R1A:256:01:ENST00000322088	10	UCEC	1	PPP2R1A	256	ENST00000322088	10	464	0.3726	1.6837	0.3772	0.9116	0.6584
TP53:187:01:ENST00000269305	4	ESCA	1	TP53	187	ENST00000269305	4	173	0.3727	0.4585	0.4396	0.9978	0.9466
ADH1B:257:06:ENST00000305046	5	SKCM	6	ADH1B	257	ENST00000305046	5	415	0.3727	1.5435	0.391	0.5692	0.2225
TTYH1:339:01:ENST00000376530	4	BLCA	1	TTYH1	339	ENST00000376530	4	382	0.373	2.6403	0.1742	0.1541	0.1342
CLMN:865:01:ENST00000298912	4	UCEC	1	CLMN	865	ENST00000298912	4	470	0.3731	2.6505	0.3331	0.604	0.3657
KRAS:12:01:ENST00000256078	7	UCS	1	KRAS	12	ENST00000256078	7	45	0.3734	0.5966	0.3977	0.7076	0.4293
DDR2:85:01:ENST00000367921	4	OV	1	DDR2	85	ENST00000367921	4	406	0.3747	3.2208	0.1017	0.313	0.2118
SSPO:2656:06:ENST00000378016	6	SKCM	6	SSPO	2656	ENST00000378016	4	416	0.3752	0.6192	0.5005	0.7081	0.3657
MYO15A:2536:01:ENST00000205890	4	BRCA	1	MYO15A	2536	ENST00000205890	4	939	0.3756	0	0.995	0.9996	0.977
ADAM32:611:06:ENST00000379907	4	SKCM	6	ADAM32	611	ENST00000379907	4	416	0.3756	1.7177	0.3537	0.8673	0.5636
PIK3CA:542:01:ENST00000263967	12	LUSC	1	PIK3CA	542	ENST00000263967	11	453	0.3759	1.6445	0.273	0.4947	0.2762
TP53:278:01:ENST00000269305	6	OV	1	TP53	278	ENST00000269305	6	404	0.3761	0.645	0.451	0.9871	0.8698
OCA2:614:01:ENST00000354638	4	UCEC	1	OCA2	614	ENST00000354638	4	470	0.3761	0	0.9942	0.9055	0.6681
TMCO4:13:01:ENST00000294543	4	BLCA	1	TMCO4	13	ENST00000294543	4	382	0.3763	0.4477	0.4232	0.9619	0.7865
CDKN2A:58:01:ENST00000304494	11	HNSC	1	CDKN2A	58	ENST00000304494	10	465	0.3767	1.6003	0.2999	0.862	0.6017
GNAS:201:01:ENST00000371085	7	COAD	1	GNAS	201	ENST00000371085	6	336	0.3771	2.043	0.321	0.8778	0.6237
MLH3:674:01:ENST00000355774	5	UCEC	1	MLH3	674	ENST00000355774	5	469	0.3778	6.941	0.0566	0	0.003
ACVR1:375:01:ENST00000263640	4	UCEC	1	ACVR1	375	ENST00000263640	4	470	0.3784	2.6136	0.3425	0.4148	0.2484
ADAM28:75:01:ENST00000265769	6	UCEC	1	ADAM28	75	ENST00000265769	5	469	0.379	1.7549	0.4326	0.4532	0.1634
CYP7B1:332:01:ENST00000310193	4	STAD	1	CYP7B1	332	ENST00000310193	4	365	0.3806	2.3788	0.2258	0.2159	0.1642
CD4:167:01:ENST00000011653	7	UCEC	1	CD4	167	ENST00000011653	6	468	0.3812	0	0.9958	0.7163	0.4402
MVK:141:01:ENST00000228510	15	COAD	1	MVK	141	ENST00000228510	6	336	0.3819	0	0.9956	0.2345	0.1327
ACVR2A:437:01:ENST00000241416	29	STAD	1	ACVR2A	437	ENST00000241416	15	354	0.3821	0.6893	0.4136	0.974	0.8206
CDKN2A:88:01:ENST00000304494	5	HNSC	1	CDKN2A	88	ENST00000304494	4	471	0.3822	0.4628	0.4424	0.9847	0.8636
ZNF442:220:01:ENST00000242804	4	UCEC	1	ZNF442	220	ENST00000242804	4	470	0.3835	0	0.9942	0.9846	0.8582
BMPR2:583:01:ENST00000374580	5	UCEC	1	BMPR2	583	ENST00000374580	4	470	0.3843	2.5528	0.353	0.381	0.2302
TP53:245:01:ENST00000269305	10	HNSC	1	TP53	245	ENST00000269305	9	466	0.3865	0.6315	0.4297	0.9627	0.7825
SPOP:133:01:ENST00000347630	19	PRAD	1	SPOP	133	ENST00000347630	19	471	0.387	0	0.9983	0.7082	0.393
KNTC1:1646:01:ENST00000333479	7	UCEC	1	KNTC1	1646	ENST00000333479	7	467	0.388	0	0.9956	0.4414	0.2402
SNCAIP:348:06:ENST00000261368	5	SKCM	6	SNCAIP	348	ENST00000261368	4	416	0.3892	0.458	0.4362	0.9274	0.7081
TP53:280:01:ENST00000269305	5	HNSC	1	TP53	280	ENST00000269305	5	470	0.3896	1.7805	0.3221	0.9881	0.8745
NFE2L2:34:01:ENST00000397062	6	BLCA	1	NFE2L2	34	ENST00000397062	6	380	0.3901	1.5801	0.3663	0.7256	0.3845
VHL:155:01:ENST00000256474	10	KIRC	1	VHL	155	ENST00000256474	10	320	0.3901	1.7683	0.3339	0.619	0.358
RPL22:89:01:ENST00000234875	5	UCEC	1	RPL22	89	ENST00000234875	4	470	0.3905	0	0.9942	0.9432	0.7404
CTNNB1:41:01:ENST00000349496	5	COAD	1	CTNNB1	41	ENST00000349496	4	338	0.3909	0	0.996	0.8834	0.6357
SLC9A4:354:01:ENST00000295269	4	OV	1	SLC9A4	354	ENST00000295269	4	406	0.3916	1.8121	0.3072	0.9875	0.8708
LRRIQ3:379:06:ENST00000354431	7	SKCM	6	LRRIQ3	379	ENST00000354431	5	415	0.3917	0.602	0.4756	0.9407	0.718
PIK3CA:546:01:ENST00000263967	5	READ	1	PIK3CA	546	ENST00000263967	4	114	0.392	2.7636	0.3276	0.7606	0.4858
GNAS:201:01:ENST00000371085	4	LIHC	1	GNAS	201	ENST00000371085	4	345	0.3924	0.4715	0.4598	0.9178	0.6681
EGFR:774:01:ENST00000275493	4	GBM	1	EGFR	774	ENST00000275493	4	356	0.3932	2.0518	0.2172	0.7143	0.4801
PIK3CA:726:01:ENST00000263967	10	BRCA	1	PIK3CA	726	ENST00000263967	9	934	0.3938	0	0.9936	0.6213	0.356
ZMYND8:635:01:ENST00000311275	7	UCEC	1	ZMYND8	635	ENST00000311275	6	468	0.3942	0	0.9958	0.4592	0.254
TP53:175:01:ENST00000269305	12	HNSC	1	TP53	175	ENST00000269305	12	463	0.3961	1.3958	0.3867	0.6831	0.3545
TP53:278:01:ENST00000269305	5	BRCA	1	TP53	278	ENST00000269305	4	939	0.3962	0	0.995	0.99	0.8891
EP300:1399:01:ENST00000263253	5	HNSC	1	EP300	1399	ENST00000263253	5	470	0.3985	0.6057	0.483	0.6656	0.3304
IDH1:132:01:ENST00000345146	5	CHOL	1	IDH1	132	ENST00000345146	5	41	0.399	1.5778	0.427	0.1443	0.0079
MTMR9:195:01:ENST00000221086	8	STAD	1	MTMR9	195	ENST00000221086	4	365	0.3994	2.2403	0.2592	0.2853	0.1966
ATP6V1B1:386:01:ENST00000234396	7	UCEC	1	ATP6V1B1	386	ENST00000234396	6	468	0.3995	1.8741	0.3809	0.971	0.804
KLHDC7A:635:06:ENST00000400664	12	SKCM	6	KLHDC7A	635	ENST00000400664	10	410	0.4	0.7573	0.5075	0.155	0.0269
APC:943:01:ENST00000257430	4	COAD	1	APC	943	ENST00000257430	4	338	0.4001	1.5643	0.534	0.4373	0.1459
TP53:245:01:ENST00000269305	8	LUAD	1	TP53	245	ENST00000269305	6	473	0.4018	0.4436	0.4178	0.8237	0.5521
BRAF:600:01:ENST00000288602	280	THCA	1	BRAF	600	ENST00000288602	279	211	0.4022	0.6276	0.3844	0.0695	0.022
CTCF:318:01:ENST00000264010	4	UCEC	1	CTCF	318	ENST00000264010	4	470	0.4027	2.4078	0.3829	0.6022	0.3627
ADAL:218:01:ENST00000562188	4	UCEC	1	ADAL	218	ENST00000562188	4	470	0.4045	0	0.9943	0.9555	0.7569
PTEN:136:01:ENST00000371953	7	UCEC	1	PTEN	136	ENST00000371953	7	467	0.4048	1.8824	0.3775	0.9815	0.8496
RBM27:816:01:ENST00000265271	8	UCEC	1	RBM27	816	ENST00000265271	6	468	0.405	0	0.9958	0.4359	0.2402
CHD3:540:01:ENST00000330494	15	UCEC	1	CHD3	540	ENST00000330494	12	462	0.4053	0.441	0.4168	0.9959	0.9292
EIF4G3:564:01:ENST00000264211	4	UCEC	1	EIF4G3	564	ENST00000264211	4	470	0.4057	2.3892	0.3877	0.4745	0.2811
TP53:248:01:ENST00000269305	5	PRAD	1	TP53	248	ENST00000269305	5	485	0.406	0	0.9986	0.9874	0.8719
DACT1:707:01:ENST00000335867	4	UCEC	1	DACT1	707	ENST00000335867	4	470	0.4071	0	0.9943	0.903	0.6628
MAGEC1:620:06:ENST00000285879	7	SKCM	6	MAGEC1	620	ENST00000285879	4	416	0.4072	1.6481	0.3912	0.7569	0.4069
RHOB:172:01:ENST00000272233	6	BLCA	1	RHOB	172	ENST00000272233	5	381	0.4097	0.4393	0.4123	0.5267	0.3056
PAX6:375:01:ENST00000241001	5	COAD	1	PAX6	375	ENST00000241001	4	338	0.4108	0	0.9961	0.8247	0.5508
TTN:31139:01:ENST00000591111	10	UCEC	1	TTN	31139	ENST00000591111	4	470	0.4123	0	0.9943	0.8698	0.6143
PIK3R2:373:01:ENST00000222254	5	UCEC	1	PIK3R2	373	ENST00000222254	4	470	0.4136	2.335	0.3998	0.5279	0.3148
BNC2:575:01:ENST00000380672	4	STAD	1	BNC2	575	ENST00000380672	4	365	0.4167	2.1479	0.2849	0.3306	0.2205
OR5P3:198:01:ENST00000328375	5	UCEC	1	OR5P3	198	ENST00000328375	4	470	0.4172	0	0.9943	0.9365	0.7235
OXER1:78:01:ENST00000378661	4	UCEC	1	OXER1	78	ENST00000378661	4	470	0.4172	2.3197	0.4046	0.5342	0.3177
ALDH2:289:01:ENST00000261733	6	UCEC	1	ALDH2	289	ENST00000261733	5	469	0.4175	0	0.996	0.7936	0.5182
SPAG17:1194:01:ENST00000336338	6	UCEC	1	SPAG17	1194	ENST00000336338	4	470	0.4176	0	0.9943	0.8729	0.615
PIK3CA:88:01:ENST00000263967	31	UCEC	1	PIK3CA	88	ENST00000263967	17	457	0.4182	0.4084	0.3737	0.6625	0.3829
TP53:280:01:ENST00000269305	5	BRCA	1	TP53	280	ENST00000269305	5	938	0.4194	2.7711	0.311	0.7174	0.4485
ATP10D:617:01:ENST00000273859	6	UCEC	1	ATP10D	617	ENST00000273859	4	470	0.4197	2.3048	0.4082	0.5597	0.3354
NLRP4:358:06:ENST00000301295	5	SKCM	6	NLRP4	358	ENST00000301295	4	416	0.422	1.4132	0.4983	0.1987	0.0116
FBXW7:479:01:ENST00000281708	6	UCEC	1	FBXW7	479	ENST00000281708	6	468	0.4221	0	0.9959	0.4616	0.2558
HTR1F:310:01:ENST00000319595	4	UCEC	1	HTR1F	310	ENST00000319595	4	470	0.4224	2.2861	0.4123	0.4557	0.2713
R3HDM2:913:01:ENST00000347140	7	UCEC	1	R3HDM2	913	ENST00000347140	6	468	0.4249	1.824	0.4097	0.8751	0.5918
KRAS:12:01:ENST00000256078	102	COAD	1	KRAS	12	ENST00000256078	94	248	0.4252	0.8154	0.4374	0.399	0.1697
YLPM1:254:01:ENST00000325680	6	COAD	1	YLPM1	254	ENST00000325680	4	338	0.4253	0	0.9961	0.7227	0.4552
PIK3CA:1047:01:ENST00000263967	4	LIHC	1	PIK3CA	1047	ENST00000263967	4	345	0.4278	0	0.9935	0.1114	0.0832
RGS12:1292:01:ENST00000336727	6	UCEC	1	RGS12	1292	ENST00000336727	4	470	0.4281	0	0.9943	0.8651	0.6078
KRAS:13:01:ENST00000256078	8	READ	1	KRAS	13	ENST00000256078	7	111	0.4295	1.835	0.4191	0.9997	0.983
SMAD4:537:01:ENST00000342988	5	READ	1	SMAD4	537	ENST00000342988	5	113	0.4297	2.5491	0.3692	0.3292	0.1905
RTKN2:450:01:ENST00000373789	6	UCEC	1	RTKN2	450	ENST00000373789	6	468	0.4308	0	0.9959	0.5361	0.3019
NBEAL1:136:01:ENST00000449802	8	UCEC	1	NBEAL1	136	ENST00000449802	7	467	0.4311	0	0.9958	0.6411	0.3749
TP53:283:01:ENST00000269305	4	HNSC	1	TP53	283	ENST00000269305	4	471	0.4321	0.4899	0.4767	1	0.996
TP53:225:01:ENST00000269305	4	LUSC	1	TP53	225	ENST00000269305	4	460	0.4332	0.4892	0.4759	0.9638	0.792
ARID5B:497:01:ENST00000279873	11	UCEC	1	ARID5B	497	ENST00000279873	11	463	0.4336	0.4661	0.4491	0.9998	0.983
AMICA1:184:06:ENST00000356289	5	SKCM	6	AMICA1	184	ENST00000356289	4	416	0.434	0.6506	0.5461	0.7085	0.3662
TP53:213:01:ENST00000269305	11	COAD	1	TP53	213	ENST00000269305	10	332	0.4345	0.4482	0.4256	0.8857	0.6355
EML4:130:01:ENST00000318522	6	UCEC	1	EML4	130	ENST00000318522	4	470	0.435	0	0.9944	0.9747	0.8234
ZBTB20:692:01:ENST00000474710	21	COAD	1	ZBTB20	692	ENST00000474710	12	330	0.4363	0.4284	0.4003	0.5386	0.2922
PTEN:27:01:ENST00000371953	5	UCEC	1	PTEN	27	ENST00000371953	4	470	0.4385	2.1983	0.4341	0.6931	0.4313
CNTN6:418:01:ENST00000350110	11	UCEC	1	CNTN6	418	ENST00000350110	8	466	0.4396	1.7753	0.424	0.7044	0.4279
VHL:117:01:ENST00000256474	5	KIRC	1	VHL	117	ENST00000256474	5	325	0.4397	1.7851	0.4193	0.9933	0.9063
FBXW7:505:01:ENST00000281708	7	CESC	1	FBXW7	505	ENST00000281708	4	244	0.4399	0.5354	0.5362	0.398	0.1323
LTBP4:1409:01:ENST00000308370	4	UCEC	1	LTBP4	1409	ENST00000308370	4	470	0.4404	2.195	0.4363	0.6544	0.4023
DDX60L:1168:01:ENST00000260184	4	UCEC	1	DDX60L	1168	ENST00000260184	4	470	0.4412	0	0.9944	0.894	0.6449
CDK4:22:06:ENST00000257904	4	SKCM	6	CDK4	22	ENST00000257904	4	416	0.4424	0.4889	0.4757	0.8252	0.5601
KANSL1L:986:01:ENST00000281772	7	UCEC	1	KANSL1L	986	ENST00000281772	6	468	0.4426	1.7312	0.4435	0.8896	0.615
TRIM49C:327:01:ENST00000448984	8	STAD	1	TRIM49C	327	ENST00000448984	8	361	0.4428	1.5551	0.384	0.9946	0.9168
PIK3CA:545:01:ENST00000263967	35	BLCA	1	PIK3CA	545	ENST00000263967	28	358	0.4442	1.2202	0.4493	0.4116	0.1603
SEC31A:462:01:ENST00000355196	13	UCEC	1	SEC31A	462	ENST00000355196	8	466	0.4455	1.7705	0.426	0.723	0.4454
PTEN:245:01:ENST00000371953	4	LUSC	1	PTEN	245	ENST00000371953	4	460	0.4473	0.4964	0.485	0.9533	0.7649
FOXA1:254:01:ENST00000250448	6	PRAD	1	FOXA1	254	ENST00000250448	6	484	0.4479	0	0.9985	0.2626	0.1458
CDKN2A:51:06:ENST00000304494	4	SKCM	6	CDKN2A	51	ENST00000304494	4	416	0.448	0.6577	0.5564	0.7654	0.4303
CTNNB1:335:01:ENST00000349496	5	LIHC	1	CTNNB1	335	ENST00000349496	4	345	0.4482	1.8705	0.381	0.9628	0.7906
TUSC3:66:01:ENST00000503731	4	STAD	1	TUSC3	66	ENST00000503731	4	365	0.4484	1.9892	0.3357	0.4801	0.3003
CASP5:178:01:ENST00000260315	6	UCEC	1	CASP5	178	ENST00000260315	5	469	0.4484	0	0.994	0.9432	0.7396
SLC6A6:392:01:ENST00000622186	5	UCEC	1	SLC6A6	392	ENST00000622186	5	469	0.4489	0	0.994	0.8044	0.5306
WRN:1128:01:ENST00000298139	6	UCEC	1	WRN	1128	ENST00000298139	6	468	0.4494	0	0.9959	0.8961	0.6497
PIK3CA:1047:01:ENST00000263967	7	LUSC	1	PIK3CA	1047	ENST00000263967	7	457	0.4499	1.8106	0.3096	0.243	0.1478
ZDHHC8:459:01:ENST00000334554	6	COAD	1	ZDHHC8	459	ENST00000334554	4	338	0.4505	0	0.9962	0.6594	0.4007
FHOD3:336:01:ENST00000359247	7	COAD	1	FHOD3	336	ENST00000359247	5	337	0.4508	0	0.9959	0.4098	0.2281
IDH1:132:06:ENST00000345146	12	SKCM	6	IDH1	132	ENST00000345146	11	409	0.4512	0.7993	0.5616	0.1887	0.0399
TP53:179:01:ENST00000269305	9	HNSC	1	TP53	179	ENST00000269305	8	467	0.452	0.5836	0.4487	0.7747	0.4973
NBPF12:125:01:ENST00000617931	7	BRCA	1	NBPF12	125	ENST00000617931	7	936	0.4527	1.4925	0.5758	0.7389	0.412
PPP2R1A:179:01:ENST00000322088	5	UCS	1	PPP2R1A	179	ENST00000322088	5	47	0.4529	1.5478	0.4191	0.9152	0.6565
STK11:245:01:ENST00000326873	4	LUAD	1	STK11	245	ENST00000326873	4	475	0.453	1.8992	0.3681	0.9978	0.9488
KIAA2026:730:01:ENST00000399933	5	UCEC	1	KIAA2026	730	ENST00000399933	5	469	0.4533	0	0.994	0.9769	0.8323
TP53:193:01:ENST00000269305	8	LUSC	1	TP53	193	ENST00000269305	7	457	0.4537	0.4334	0.4046	0.1116	0.0728
ENO3:367:01:ENST00000323997	4	UCEC	1	ENO3	367	ENST00000323997	4	470	0.4545	0	0.9944	0.6941	0.4283
CTCF:48:01:ENST00000264010	4	UCEC	1	CTCF	48	ENST00000264010	4	470	0.4546	0	0.9944	0.947	0.7491
RB1:654:01:ENST00000267163	4	GBM	1	RB1	654	ENST00000267163	4	356	0.4553	0.7659	0.5994	0.4895	0.0939
PPARGC1B:137:01:ENST00000309241	4	UCEC	1	PPARGC1B	137	ENST00000309241	4	470	0.4558	0	0.9944	0.8397	0.5743
ZMYM2:1044:01:ENST00000382871	6	UCEC	1	ZMYM2	1044	ENST00000382871	5	469	0.4569	2.3663	0.3947	0.1757	0.116
STAG2:593:01:ENST00000371144	5	BLCA	1	STAG2	593	ENST00000371144	5	381	0.4572	0.6337	0.5215	0.9075	0.6464
MYO16:842:01:ENST00000356711	5	UCEC	1	MYO16	842	ENST00000356711	5	469	0.4572	2.3649	0.3954	0.115	0.0859
CA2:147:01:ENST00000285379	4	UCEC	1	CA2	147	ENST00000285379	4	470	0.4574	0	0.9944	0.9999	0.9892
PIK3C2G:1231:06:ENST00000266497	4	SKCM	6	PIK3C2G	1231	ENST00000266497	4	416	0.4575	1.5541	0.4495	0.8006	0.4629
MAPK1:322:01:ENST00000215832	10	CESC	1	MAPK1	322	ENST00000215832	10	238	0.4598	0.6128	0.4961	0.9857	0.8623
PIK3R1:567:01:ENST00000521381	4	UCEC	1	PIK3R1	567	ENST00000521381	4	470	0.4604	0	0.9944	0.9368	0.7244
TRPV3:87:01:ENST00000576742	4	UCEC	1	TRPV3	87	ENST00000576742	4	470	0.4613	2.0988	0.4626	0.7199	0.4557
VPS13A:2885:01:ENST00000360280	5	UCEC	1	VPS13A	2885	ENST00000360280	5	469	0.4613	2.3084	0.4077	0.2167	0.1358
MUC16:5119:06:ENST00000397910	8	SKCM	6	MUC16	5119	ENST00000397910	5	415	0.4615	1.4206	0.4887	0.4262	0.1253
SPECC1:303:01:ENST00000261503	16	UCEC	1	SPECC1	303	ENST00000261503	15	459	0.4616	1.4252	0.4911	0.8778	0.6004
TP53:192:01:ENST00000269305	6	OV	1	TP53	192	ENST00000269305	5	405	0.4635	0.4541	0.4309	0.1315	0.0921
CTCF:448:01:ENST00000264010	7	UCEC	1	CTCF	448	ENST00000264010	6	468	0.4644	1.6576	0.4809	0.8872	0.6136
SEC16B:434:01:ENST00000308284	5	UCEC	1	SEC16B	434	ENST00000308284	4	470	0.4657	0	0.9944	0.9372	0.7259
TP53:224:01:ENST00000269305	5	HNSC	1	TP53	224	ENST00000269305	4	471	0.4674	1.9031	0.3657	0.6971	0.4458
PTCH1:1308:01:ENST00000331920	4	UCEC	1	PTCH1	1308	ENST00000331920	4	470	0.4681	0	0.9945	0.9168	0.6876
SVIL:1863:01:ENST00000355867	11	UCEC	1	SVIL	1863	ENST00000355867	10	464	0.4686	0.4966	0.4869	0.8182	0.5122
NCOR2:976:01:ENST00000405201	8	UCEC	1	NCOR2	976	ENST00000405201	7	467	0.4689	0	0.9959	0.1334	0.0794
PTEN:267:01:ENST00000371953	10	UCEC	1	PTEN	267	ENST00000371953	9	465	0.469	0.5103	0.5041	0.9082	0.6532
DNAH5:742:06:ENST00000265104	5	SKCM	6	DNAH5	742	ENST00000265104	4	416	0.4694	0.5049	0.496	0.7479	0.4803
ARAF:255:01:ENST00000377045	4	UCEC	1	ARAF	255	ENST00000377045	4	470	0.4696	0	0.9944	0.8951	0.6497
ABCC5:1090:01:ENST00000334444	7	UCEC	1	ABCC5	1090	ENST00000334444	4	470	0.471	2.0548	0.4745	0.934	0.7224
PTEN:212:01:ENST00000371953	7	UCEC	1	PTEN	212	ENST00000371953	7	467	0.4712	0	0.9959	0.1236	0.075
TP53:281:01:ENST00000269305	4	OV	1	TP53	281	ENST00000269305	4	406	0.472	0.4886	0.475	0.3014	0.1876
NLGN3:781:01:ENST00000358741	6	UCEC	1	NLGN3	781	ENST00000358741	5	469	0.4728	0	0.9941	0.748	0.4719
XPOT:126:01:ENST00000332707	6	UCEC	1	XPOT	126	ENST00000332707	6	468	0.4734	1.614	0.5041	0.7777	0.4547
CDKN2A:84:01:ENST00000304494	7	LUSC	1	CDKN2A	84	ENST00000304494	6	458	0.4737	1.6487	0.3909	0.8668	0.6099
CCDC73:448:01:ENST00000335185	8	UCEC	1	CCDC73	448	ENST00000335185	7	467	0.4749	0	0.996	0.1447	0.0843
RTN4:670:01:ENST00000337526	5	COAD	1	RTN4	670	ENST00000337526	4	338	0.4755	0	0.9962	0.6514	0.3879
FAM161A:144:01:ENST00000405894	6	UCEC	1	FAM161A	144	ENST00000405894	4	470	0.4755	0	0.9945	0.9317	0.7163
ZNF358:132:01:ENST00000394341	5	UCEC	1	ZNF358	132	ENST00000394341	4	470	0.4757	2.0379	0.4799	0.6411	0.3918
ACVR1:206:01:ENST00000263640	4	UCEC	1	ACVR1	206	ENST00000263640	4	470	0.477	0	0.9945	0.6173	0.3676
MRI1:330:01:ENST00000040663	6	UCEC	1	MRI1	330	ENST00000040663	5	469	0.4796	0	0.9941	0.994	0.9121
ATF7IP:320:01:ENST00000261168	10	UCEC	1	ATF7IP	320	ENST00000261168	7	467	0.4798	1.7001	0.4656	0.9537	0.7529
MB21D2:311:01:ENST00000392452	7	LUSC	1	MB21D2	311	ENST00000392452	5	459	0.4814	1.5529	0.4505	0.9614	0.7717
PCLO:2442:01:ENST00000333891	9	UCEC	1	PCLO	2442	ENST00000333891	5	469	0.4837	0	0.9941	0.722	0.4489
TP53:125:01:ENST00000269305	4	HNSC	1	TP53	125	ENST00000269305	4	471	0.4846	1.8413	0.3909	0.6375	0.4007
APC:232:01:ENST00000257430	7	COAD	1	APC	232	ENST00000257430	5	337	0.4868	0	0.9961	0.291	0.1673
CDH6:524:06:ENST00000265071	6	SKCM	6	CDH6	524	ENST00000265071	5	415	0.4885	0.7392	0.6042	0.5546	0.2273
TP53:213:01:ENST00000269305	4	SARC	1	TP53	213	ENST00000269305	4	221	0.4908	0.5277	0.5255	0.9897	0.8834
RBM6:834:01:ENST00000266022	7	UCEC	1	RBM6	834	ENST00000266022	6	468	0.4908	0	0.9939	0.5981	0.3434
CTNNB1:45:06:ENST00000349496	5	SKCM	6	CTNNB1	45	ENST00000349496	5	415	0.4917	0.7403	0.6064	0.4618	0.162
DNAH7:1257:01:ENST00000312428	5	UCEC	1	DNAH7	1257	ENST00000312428	5	469	0.4923	0	0.9942	0.7038	0.4329
CYC1:93:01:ENST00000318911	4	UCEC	1	CYC1	93	ENST00000318911	4	470	0.4933	0	0.9945	0.9765	0.8243
NPAT:243:01:ENST00000278612	4	UCEC	1	NPAT	243	ENST00000278612	4	470	0.4935	0	0.9945	0.804	0.5322
ARHGEF40:1487:01:ENST00000298694	5	UCEC	1	ARHGEF40	1487	ENST00000298694	4	470	0.4946	0	0.9945	0.6278	0.3758
FBXW7:465:01:ENST00000281708	15	COAD	1	FBXW7	465	ENST00000281708	10	332	0.4953	0.4791	0.465	0.9437	0.7418
PTEN:157:01:ENST00000371953	4	UCEC	1	PTEN	157	ENST00000371953	4	470	0.4961	1.9636	0.5031	0.9481	0.7369
SCAF4:120:01:ENST00000286835	5	UCEC	1	SCAF4	120	ENST00000286835	4	470	0.498	1.9569	0.5051	0.7675	0.4989
PIK3CA:453:01:ENST00000263967	7	BRCA	1	PIK3CA	453	ENST00000263967	5	938	0.4989	2.255	0.419	0.8872	0.6384
KRAS:13:01:ENST00000256078	32	COAD	1	KRAS	13	ENST00000256078	29	313	0.4991	1.2823	0.5066	0.8761	0.5989
JAK1:860:01:ENST00000342505	41	UCEC	1	JAK1	860	ENST00000342505	41	433	0.4998	0.7552	0.5083	0.8182	0.5203
CAMTA2:866:01:ENST00000348066	9	UCEC	1	CAMTA2	866	ENST00000348066	8	466	0.4999	0	0.9939	0.0142	0.0156
TP53:266:01:ENST00000269305	4	COAD	1	TP53	266	ENST00000269305	4	338	0.5008	0	0.9963	0.4688	0.2667
TP53:163:01:ENST00000269305	7	LUSC	1	TP53	163	ENST00000269305	7	457	0.5008	0.4608	0.4398	0.1036	0.0685
RBM15B:844:01:ENST00000563281	5	UCEC	1	RBM15B	844	ENST00000563281	4	470	0.5011	0	0.9945	0.6424	0.3864
APC:935:01:ENST00000257430	9	COAD	1	APC	935	ENST00000257430	9	333	0.5025	1.454	0.5268	0.8312	0.5305
TP53:331:01:ENST00000269305	7	OV	1	TP53	331	ENST00000269305	7	403	0.5033	1.8969	0.2728	0.1255	0.0906
FAHD2B:281:01:ENST00000272610	8	UCEC	1	FAHD2B	281	ENST00000272610	7	467	0.504	0	0.994	0.1156	0.0707
FGF13:23:01:ENST00000436198	6	UCEC	1	FGF13	23	ENST00000436198	5	469	0.5048	0	0.9942	0.8765	0.6216
KLHL14:232:01:ENST00000359358	6	STAD	1	KLHL14	232	ENST00000359358	4	365	0.5057	1.7667	0.4246	0.7206	0.4634
ADH1C:5:06:ENST00000515683	4	SKCM	6	ADH1C	5	ENST00000515683	4	416	0.5074	0.759	0.6439	0.3677	0.0949
BEND3:265:01:ENST00000369042	8	UCEC	1	BEND3	265	ENST00000369042	7	467	0.508	1.6102	0.5062	0.9968	0.935
TP53:175:01:ENST00000269305	8	LUSC	1	TP53	175	ENST00000269305	8	456	0.5087	1.4625	0.4535	0.9789	0.8371
TP53:342:01:ENST00000269305	10	BRCA	1	TP53	342	ENST00000269305	9	934	0.5094	0	0.9942	0.2589	0.1363
FGGY:140:01:ENST00000303721	5	UCEC	1	FGGY	140	ENST00000303721	4	470	0.5102	0	0.9946	0.7694	0.4965
PTPRB:529:06:ENST00000261266	4	SKCM	6	PTPRB	529	ENST00000261266	4	416	0.5117	1.4663	0.511	0.7205	0.3647
APC:876:01:ENST00000257430	14	COAD	1	APC	876	ENST00000257430	12	330	0.512	1.3565	0.5541	0.5149	0.221
FLNB:531:01:ENST00000295956	8	UCEC	1	FLNB	531	ENST00000295956	7	467	0.5121	0	0.994	0.1284	0.0776
PLEKHA7:802:01:ENST00000355661	6	UCEC	1	PLEKHA7	802	ENST00000355661	6	468	0.5123	2.8429	0.3017	0.01	0.0183
SLC16A4:475:01:ENST00000369779	6	UCEC	1	SLC16A4	475	ENST00000369779	4	470	0.5126	1.9086	0.521	0.7377	0.4697
TP53:307:01:ENST00000269305	4	OV	1	TP53	307	ENST00000269305	4	406	0.5129	1.3729	0.5302	0.4185	0.0628
OR51B2:163:06:ENST00000328813	7	SKCM	6	OR51B2	163	ENST00000328813	5	415	0.5131	0.6694	0.5727	0.9953	0.9222
CASP8:465:01:ENST00000432109	4	HNSC	1	CASP8	465	ENST00000432109	4	471	0.5138	1.7448	0.4341	0.9271	0.711
PFAS:618:01:ENST00000314666	4	UCEC	1	PFAS	618	ENST00000314666	4	470	0.5145	0	0.9946	0.7807	0.5065
ASXL3:453:06:ENST00000269197	4	SKCM	6	ASXL3	453	ENST00000269197	4	416	0.5152	1.4624	0.5142	0.7113	0.3546
TP53:273:01:ENST00000269305	20	COAD	1	TP53	273	ENST00000269305	19	323	0.5154	1.3614	0.5063	0.8639	0.5996
TP53:245:01:ENST00000269305	8	OV	1	TP53	245	ENST00000269305	8	402	0.5154	0.6921	0.527	0.6223	0.3662
GRM7:786:06:ENST00000357716	7	SKCM	6	GRM7	786	ENST00000357716	4	416	0.5155	0.7624	0.6496	0.2645	0.052
GOLPH3:188:01:ENST00000265070	6	UCEC	1	GOLPH3	188	ENST00000265070	5	469	0.5159	0	0.9942	0.7314	0.4571
TP53:179:01:ENST00000269305	4	PAAD	1	TP53	179	ENST00000269305	4	172	0.5171	2.016	0.3307	0.1197	0.1152
DDX26B:120:01:ENST00000370752	6	UCEC	1	DDX26B	120	ENST00000370752	5	469	0.5172	0	0.9942	0.6348	0.3764
DDX17:163:01:ENST00000403230	4	UCEC	1	DDX17	163	ENST00000403230	4	470	0.5185	0	0.9946	0.6658	0.4035
TP53:331:01:ENST00000269305	6	BRCA	1	TP53	331	ENST00000269305	5	938	0.5193	0.6378	0.6577	0.5266	0.219
MUC4:3516:01:ENST00000463781	12	BRCA	1	MUC4	3516	ENST00000463781	12	931	0.5198	1.6733	0.4708	0.76	0.4755
INTS2:577:01:ENST00000444766	5	THCA	1	INTS2	577	ENST00000444766	4	486	0.5206	0	0.9975	0.9998	0.9837
INTS2:578:01:ENST00000444766	5	THCA	1	INTS2	578	ENST00000444766	4	486	0.5206	0	0.9975	0.9998	0.9837
BRSK1:379:01:ENST00000309383	8	UCEC	1	BRSK1	379	ENST00000309383	6	468	0.5218	0	0.9941	0.5204	0.2921
TP53:249:01:ENST00000269305	11	LUAD	1	TP53	249	ENST00000269305	8	471	0.523	1.5802	0.4339	0.7111	0.4384
PRRG1:134:01:ENST00000378628	14	UCEC	1	PRRG1	134	ENST00000378628	9	465	0.5232	0.536	0.536	0.9953	0.9235
FKBP10:278:01:ENST00000321562	4	UCEC	1	FKBP10	278	ENST00000321562	4	470	0.5239	0	0.9946	0.713	0.4435
USP26:348:01:ENST00000370832	8	UCEC	1	USP26	348	ENST00000370832	6	468	0.5245	0	0.9941	0.7386	0.4616
SMAD4:361:01:ENST00000342988	4	PAAD	1	SMAD4	361	ENST00000342988	4	172	0.5258	0.678	0.5871	0.9331	0.698
TRIM49:327:01:ENST00000329758	4	STAD	1	TRIM49	327	ENST00000329758	4	365	0.5271	1.7085	0.4543	0.9297	0.6902
PIK3CA:344:01:ENST00000263967	7	UCEC	1	PIK3CA	344	ENST00000263967	7	467	0.5297	0.5549	0.5591	0.5708	0.259
TP53:175:01:ENST00000269305	19	BRCA	1	TP53	175	ENST00000269305	19	924	0.5302	1.4919	0.4947	0.8478	0.5751
KMT2D:1235:01:ENST00000301067	10	UCEC	1	KMT2D	1235	ENST00000301067	10	464	0.5306	0.5251	0.5235	0.9457	0.7335
HIST1H3C:37:01:ENST00000612966	4	HNSC	1	HIST1H3C	37	ENST00000612966	4	471	0.5315	1.6976	0.4571	0.5991	0.3741
ART1:246:01:ENST00000250693	4	UCEC	1	ART1	246	ENST00000250693	4	470	0.5315	1.8529	0.5403	0.958	0.7766
GUF1:645:01:ENST00000281543	5	COAD	1	GUF1	645	ENST00000281543	4	338	0.5322	1.7919	0.5633	0.4659	0.2786
PCDHB4:751:06:ENST00000194152	4	SKCM	6	PCDHB4	751	ENST00000194152	4	416	0.5324	1.4367	0.5339	0.6899	0.332
TP53:173:01:ENST00000269305	4	LGG	1	TP53	173	ENST00000269305	4	495	0.5325	0	0.9948	0.4783	0.2761
TP53:282:01:ENST00000269305	6	STAD	1	TP53	282	ENST00000269305	5	364	0.5325	1.4486	0.5253	0.9185	0.6655
CDKN2A:110:01:ENST00000304494	5	LUSC	1	CDKN2A	110	ENST00000304494	5	459	0.5328	1.4624	0.5142	0.9137	0.6584
PSME4:1805:01:ENST00000404125	11	STAD	1	PSME4	1805	ENST00000404125	6	363	0.533	0.7443	0.6132	0.5233	0.2131
ASH1L:1222:01:ENST00000368346	4	COAD	1	ASH1L	1222	ENST00000368346	4	338	0.5336	1.8229	0.5518	0.6044	0.3634
DNMT3A:882:03:ENST00000264709	10	LAML	3	DNMT3A	882	ENST00000264709	9	109	0.5338	1.3235	0.481	0.9996	0.973
PIK3CA:420:01:ENST00000263967	7	UCEC	1	PIK3CA	420	ENST00000263967	7	467	0.5339	0	0.9942	0.0448	0.0357
TP53:220:01:ENST00000269305	4	STAD	1	TP53	220	ENST00000269305	4	365	0.5352	0.5407	0.5401	0.984	0.8586
KRAS:12:01:ENST00000256078	7	CESC	1	KRAS	12	ENST00000256078	7	241	0.5355	1.688	0.4676	0.654	0.3904
MUC4:3516:01:ENST00000463781	17	LIHC	1	MUC4	3516	ENST00000463781	16	333	0.5355	0.726	0.5299	0.8852	0.6305
PTEN:130:01:ENST00000371953	7	GBM	1	PTEN	130	ENST00000371953	6	354	0.5362	1.5771	0.3696	0.5874	0.365
DYNC1I2:36:01:ENST00000397119	5	UCEC	1	DYNC1I2	36	ENST00000397119	5	469	0.537	0	0.9943	0.9016	0.6603
EXOSC9:78:01:ENST00000243498	5	UCEC	1	EXOSC9	78	ENST00000243498	4	470	0.5384	1.8157	0.5536	0.8604	0.6036
PRPF8:1832:01:ENST00000304992	4	UCEC	1	PRPF8	1832	ENST00000304992	4	470	0.5399	0	0.9947	0.6648	0.4038
RIF1:1505:01:ENST00000243326	9	STAD	1	RIF1	1505	ENST00000243326	4	365	0.5403	0.5445	0.5447	0.9228	0.6996
GATA3:350:01:ENST00000346208	4	BRCA	1	GATA3	350	ENST00000346208	4	939	0.5423	0	0.9932	0.9052	0.6686
TP53:132:01:ENST00000269305	4	BLCA	1	TP53	132	ENST00000269305	4	382	0.5427	1.7538	0.4312	0.4653	0.2917
ILK:71:01:ENST00000299421	10	UCEC	1	ILK	71	ENST00000299421	9	465	0.5427	0.5496	0.5522	0.8557	0.5645
NUCB2:400:01:ENST00000529010	7	UCEC	1	NUCB2	400	ENST00000529010	4	470	0.543	1.8202	0.5521	0.8671	0.6131
TPTE:123:06:ENST00000618007	7	SKCM	6	TPTE	123	ENST00000618007	5	415	0.5434	1.3275	0.5755	0.4482	0.138
DTX4:510:01:ENST00000227451	8	UCEC	1	DTX4	510	ENST00000227451	7	467	0.5437	0.5603	0.5663	0.6986	0.3724
CEP350:2889:01:ENST00000367607	4	UCEC	1	CEP350	2889	ENST00000367607	4	470	0.5451	0	0.9947	0.9959	0.9289
PLEKHA6:328:01:ENST00000272203	15	UCEC	1	PLEKHA6	328	ENST00000272203	13	461	0.5457	0.6618	0.5651	0.6374	0.3223
CD93:315:01:ENST00000246006	6	UCEC	1	CD93	315	ENST00000246006	5	469	0.5466	0	0.9944	0.8642	0.6036
TP53:248:01:ENST00000269305	15	ESCA	1	TP53	248	ENST00000269305	14	163	0.5472	1.2416	0.5649	0.6045	0.2898
KANSL1:968:01:ENST00000574590	5	UCEC	1	KANSL1	968	ENST00000574590	5	469	0.5474	0	0.9944	0.4359	0.2449
COL7A1:2029:01:ENST00000328333	5	UCEC	1	COL7A1	2029	ENST00000328333	4	470	0.5485	0	0.9947	0.8999	0.6582
TICAM1:642:01:ENST00000248244	7	UCEC	1	TICAM1	642	ENST00000248244	6	468	0.549	0	0.9943	0.3377	0.1848
KMT2B:1879:01:ENST00000420124	5	UCEC	1	KMT2B	1879	ENST00000420124	4	470	0.5491	0	0.9947	0.9763	0.8294
NIPBL:603:01:ENST00000282516	6	UCEC	1	NIPBL	603	ENST00000282516	6	468	0.5497	2.1522	0.4479	0.0246	0.03
TTF1:274:01:ENST00000334270	4	UCEC	1	TTF1	274	ENST00000334270	4	470	0.5508	0	0.9947	0.8479	0.5812
DGKZ:1038:01:ENST00000454345	4	UCEC	1	DGKZ	1038	ENST00000454345	4	470	0.5511	1.7971	0.5604	0.8625	0.6058
CNGA4:510:01:ENST00000379936	4	STAD	1	CNGA4	510	ENST00000379936	4	365	0.5513	1.6411	0.4873	0.6279	0.39
FRYL:330:01:ENST00000358350	6	UCEC	1	FRYL	330	ENST00000358350	5	469	0.5521	0	0.9944	0.4435	0.248
KCNK2:6:01:ENST00000444842	4	BLCA	1	KCNK2	6	ENST00000444842	4	382	0.5528	0.5465	0.5469	0.7177	0.4536
ANGPT1:275:06:ENST00000517746	4	SKCM	6	ANGPT1	275	ENST00000517746	4	416	0.5555	1.7574	0.4288	0.7617	0.5012
SYT1:180:06:ENST00000261205	5	SKCM	6	SYT1	180	ENST00000261205	5	415	0.5562	0.6939	0.6077	0.9934	0.9093
KIAA1919:202:01:ENST00000368847	8	UCEC	1	KIAA1919	202	ENST00000368847	6	468	0.5564	0	0.9943	0.1174	0.0758
TP53:135:01:ENST00000269305	4	BRCA	1	TP53	135	ENST00000269305	4	939	0.5567	1.937	0.5107	0.9777	0.8279
BRINP3:618:06:ENST00000367462	4	SKCM	6	BRINP3	618	ENST00000367462	4	416	0.5572	1.7499	0.4317	0.7987	0.5358
CLASRP:95:01:ENST00000221455	6	UCEC	1	CLASRP	95	ENST00000221455	5	469	0.5572	1.7063	0.5962	0.3659	0.2115
ARID1A:1326:01:ENST00000324856	5	UCEC	1	ARID1A	1326	ENST00000324856	5	469	0.5584	0	0.9944	0.6428	0.3815
ZC3H18:680:01:ENST00000301011	8	UCEC	1	ZC3H18	680	ENST00000301011	7	467	0.5588	1.4842	0.5819	0.9999	0.9905
MYLK:427:06:ENST00000360304	4	SKCM	6	MYLK	427	ENST00000360304	4	416	0.5622	0.5656	0.5702	0.6635	0.4088
TBC1D10C:321:01:ENST00000542590	5	UCEC	1	TBC1D10C	321	ENST00000542590	4	470	0.5628	0	0.9947	0.784	0.5106
TP53:273:01:ENST00000269305	10	READ	1	TP53	273	ENST00000269305	9	109	0.5632	0.5504	0.5612	0.9987	0.9539
PXDN:865:01:ENST00000252804	9	UCEC	1	PXDN	865	ENST00000252804	9	465	0.5635	0.5552	0.5601	0.9956	0.9256
TP53:282:01:ENST00000269305	5	UCEC	1	TP53	282	ENST00000269305	5	469	0.5661	1.6894	0.6029	0.532	0.3089
PCDHB12:61:06:ENST00000239450	4	SKCM	6	PCDHB12	61	ENST00000239450	4	416	0.5668	1.3909	0.5713	0.7354	0.3815
ARID1A:1072:01:ENST00000324856	7	UCEC	1	ARID1A	1072	ENST00000324856	7	467	0.5677	0	0.9945	0.2987	0.1613
MB21D2:311:01:ENST00000392452	5	BLCA	1	MB21D2	311	ENST00000392452	4	382	0.5685	0.5558	0.5585	0.851	0.591
TEX15:511:06:ENST00000256246	7	SKCM	6	TEX15	511	ENST00000256246	4	416	0.5701	1.3867	0.5748	0.7057	0.3487
TP53:244:01:ENST00000269305	7	LUSC	1	TP53	244	ENST00000269305	6	458	0.5708	1.4589	0.5179	0.8806	0.6323
MEGF8:166:01:ENST00000251268	5	UCEC	1	MEGF8	166	ENST00000251268	5	469	0.5711	1.6723	0.6098	0.4976	0.2876
CPNE4:183:06:ENST00000429747	4	SKCM	6	CPNE4	183	ENST00000429747	4	416	0.5712	0.7269	0.6539	0.8463	0.5389
CDH6:722:06:ENST00000265071	5	SKCM	6	CDH6	722	ENST00000265071	4	416	0.5714	1.3858	0.576	0.6487	0.2916
ELMSAN1:314:01:ENST00000286523	18	UCEC	1	ELMSAN1	314	ENST00000286523	17	457	0.572	1.452	0.5266	0.2011	0.0986
THSD7B:1180:06:ENST00000272643	8	SKCM	6	THSD7B	1180	ENST00000272643	5	415	0.5729	0.7803	0.6702	0.5896	0.2551
FBXW7:582:01:ENST00000281708	4	COAD	1	FBXW7	582	ENST00000281708	4	338	0.5747	1.6994	0.5991	0.7302	0.4612
CNOT2:NA:01:ENST00000229195	10	STAD	1	CNOT2	NA	ENST00000229195	4	365	0.5749	0.5641	0.5683	0.824	0.5598
ERBB3:104:01:ENST00000267101	10	STAD	1	ERBB3	104	ENST00000267101	5	364	0.5773	1.3806	0.5808	0.9469	0.7314
FKBP15:665:01:ENST00000238256	4	UCEC	1	FKBP15	665	ENST00000238256	4	470	0.5778	0	0.9948	0.8355	0.5692
SLC9A4:798:01:ENST00000295269	6	UCEC	1	SLC9A4	798	ENST00000295269	5	469	0.578	0	0.9945	0.3254	0.1835
PDE1A:114:06:ENST00000410103	5	SKCM	6	PDE1A	114	ENST00000410103	4	416	0.5781	1.3771	0.5831	0.7115	0.355
BACE2:102:01:ENST00000330333	6	UCEC	1	BACE2	102	ENST00000330333	5	469	0.5791	0	0.9945	0.2889	0.1643
FBXO34:485:01:ENST00000313833	4	UCEC	1	FBXO34	485	ENST00000313833	4	470	0.5791	1.7267	0.5876	0.9105	0.6787
BCORL1:1681:01:ENST00000218147	12	UCEC	1	BCORL1	1681	ENST00000218147	11	463	0.5806	0.5375	0.5375	0.6655	0.3904
MYO18B:1680:06:ENST00000536101	4	SKCM	6	MYO18B	1680	ENST00000536101	4	416	0.5812	1.3725	0.5867	0.7202	0.3644
NPM1:288:03:ENST00000296930	12	LAML	3	NPM1	288	ENST00000296930	9	109	0.5815	1.3975	0.4742	0.0387	0.0371
PIK3CA:545:01:ENST00000263967	5	UCS	1	PIK3CA	545	ENST00000263967	5	47	0.5829	1.2964	0.6052	0.3056	0.0353
GLTSCR1:937:01:ENST00000396720	8	UCEC	1	GLTSCR1	937	ENST00000396720	5	469	0.5831	1.6356	0.6253	0.5937	0.3507
B4GALNT4:991:01:ENST00000329962	5	UCEC	1	B4GALNT4	991	ENST00000329962	5	469	0.5851	0	0.9945	0.2799	0.1592
FBXW7:689:01:ENST00000281708	6	UCEC	1	FBXW7	689	ENST00000281708	4	470	0.5866	1.7091	0.5949	0.8113	0.5436
HPS1:325:01:ENST00000325103	7	UCEC	1	HPS1	325	ENST00000325103	7	467	0.5866	1.4291	0.6182	0.694	0.365
CELSR1:1849:01:ENST00000262738	4	UCEC	1	CELSR1	1849	ENST00000262738	4	470	0.587	1.707	0.5954	0.9693	0.7989
XIRP2:2264:06:ENST00000628543	6	SKCM	6	XIRP2	2264	ENST00000628543	6	414	0.5875	1.324	0.5793	0.8287	0.5129
TP53:176:01:ENST00000269305	6	STAD	1	TP53	176	ENST00000269305	5	364	0.588	0.7056	0.6261	0.3868	0.1275
OR51S1:194:06:ENST00000322101	7	SKCM	6	OR51S1	194	ENST00000322101	4	416	0.5883	1.3637	0.5943	0.6642	0.3062
SOX17:403:01:ENST00000297316	11	UCEC	1	SOX17	403	ENST00000297316	11	463	0.5903	0.5426	0.5436	0.6576	0.3832
BAG6:115:01:ENST00000375964	4	UCEC	1	BAG6	115	ENST00000375964	4	470	0.5907	1.6978	0.599	0.9414	0.7377
E2F1:435:01:ENST00000343380	5	UCEC	1	E2F1	435	ENST00000343380	5	469	0.5908	1.6145	0.6348	0.4151	0.2376
TP53:331:01:ENST00000269305	4	COAD	1	TP53	331	ENST00000269305	4	338	0.5912	1.659	0.6159	0.6235	0.3748
CENPC:206:01:ENST00000273853	7	UCEC	1	CENPC	206	ENST00000273853	5	469	0.592	0	0.9946	0.4396	0.247
TP53:273:01:ENST00000269305	17	LUSC	1	TP53	273	ENST00000269305	14	450	0.5921	1.2939	0.5354	0.5811	0.326
FGFR2:549:01:ENST00000358487	11	UCEC	1	FGFR2	549	ENST00000358487	6	468	0.5921	0	0.9946	0.1153	0.0747
LARP7:405:01:ENST00000324052	5	UCEC	1	LARP7	405	ENST00000324052	4	470	0.5922	1.6946	0.6004	0.9961	0.9269
COL11A1:546:01:ENST00000370096	6	UCEC	1	COL11A1	546	ENST00000370096	5	469	0.5925	1.6083	0.637	0.6216	0.3699
IDH2:140:03:ENST00000330062	9	LAML	3	IDH2	140	ENST00000330062	8	110	0.5929	0.7727	0.6173	0.2872	0.1602
DNAH5:920:06:ENST00000265104	7	SKCM	6	DNAH5	920	ENST00000265104	5	415	0.593	0.8322	0.7174	0.1632	0.0201
NBEA:1121:01:ENST00000400445	7	UCEC	1	NBEA	1121	ENST00000400445	5	469	0.5935	0	0.9945	0.3368	0.1891
CWF19L2:96:01:ENST00000282251	5	UCEC	1	CWF19L2	96	ENST00000282251	4	470	0.5936	1.6911	0.6018	0.8919	0.6481
PMS2:414:01:ENST00000265849	6	UCEC	1	PMS2	414	ENST00000265849	6	468	0.594	1.7388	0.583	0.159	0.1011
TP53:238:01:ENST00000269305	5	OV	1	TP53	238	ENST00000269305	5	405	0.5952	2.0049	0.33	0.1224	0.0997
CTCF:377:01:ENST00000264010	10	UCEC	1	CTCF	377	ENST00000264010	9	465	0.5957	1.4351	0.6142	0.9967	0.9358
RPS6KA6:110:01:ENST00000262752	5	UCEC	1	RPS6KA6	110	ENST00000262752	4	470	0.5971	1.6836	0.605	0.9265	0.7048
NFE2L2:79:01:ENST00000397062	10	LUSC	1	NFE2L2	79	ENST00000397062	9	455	0.5976	0.6577	0.556	0.1374	0.0817
ADAMTS9:1029:01:ENST00000498707	6	UCEC	1	ADAMTS9	1029	ENST00000498707	4	470	0.5983	0	0.9948	0.6662	0.4048
APC:1378:01:ENST00000257430	6	COAD	1	APC	1378	ENST00000257430	6	336	0.5996	1.4485	0.6055	0.9971	0.9397
LARP4B:163:01:ENST00000316157	24	STAD	1	LARP4B	163	ENST00000316157	9	360	0.6001	0.7907	0.6439	0.5167	0.2174
SPRED1:79:01:ENST00000299084	5	UCEC	1	SPRED1	79	ENST00000299084	4	470	0.6002	0	0.9948	0.9712	0.8128
PIK3CA:1047:01:ENST00000263967	4	ESCA	1	PIK3CA	1047	ENST00000263967	4	173	0.601	0.7443	0.6816	0.5667	0.24
TP53:187:01:ENST00000269305	6	LUSC	1	TP53	187	ENST00000269305	6	458	0.6012	1.4109	0.5549	0.9521	0.7622
EGFR:108:01:ENST00000275493	5	GBM	1	EGFR	108	ENST00000275493	5	355	0.6014	0.8229	0.6992	0.9244	0.6738
RP1:1055:06:ENST00000220676	5	SKCM	6	RP1	1055	ENST00000220676	4	416	0.6021	0.7438	0.678	0.8212	0.5026
TP53:245:01:ENST00000269305	5	BRCA	1	TP53	245	ENST00000269305	5	938	0.6034	1.8	0.5595	0.9678	0.7932
TP53:163:01:ENST00000269305	7	HNSC	1	TP53	163	ENST00000269305	7	468	0.6034	0.7636	0.6431	0.7904	0.4716
MYCT1:55:01:ENST00000367245	4	STAD	1	MYCT1	55	ENST00000367245	4	365	0.604	1.5189	0.5578	0.9988	0.9606
ADORA1:122:01:ENST00000309502	4	UCEC	1	ADORA1	122	ENST00000309502	4	470	0.6041	0	0.9949	0.6405	0.3845
ZFHX2:1924:01:ENST00000419474	4	UCEC	1	ZFHX2	1924	ENST00000419474	4	470	0.6042	0	0.9949	0.6573	0.3985
DDC:433:01:ENST00000357936	8	STAD	1	DDC	433	ENST00000357936	4	365	0.6048	0.583	0.5909	0.5901	0.3544
PTPRT:695:06:ENST00000373187	4	SKCM	6	PTPRT	695	ENST00000373187	4	416	0.6049	0.5965	0.6066	0.588	0.3539
ZFHX3:763:01:ENST00000268489	10	UCEC	1	ZFHX3	763	ENST00000268489	8	466	0.6053	0.6011	0.6132	0.9581	0.7654
CSMD2:1996:06:ENST00000241312	5	SKCM	6	CSMD2	1996	ENST00000241312	4	416	0.6059	0.5968	0.6071	0.5614	0.3354
NRAS:12:06:ENST00000369535	5	SKCM	6	NRAS	12	ENST00000369535	4	416	0.6059	1.343	0.6126	0.6472	0.2899
TP53:248:01:ENST00000269305	7	UCS	1	TP53	248	ENST00000269305	6	46	0.6062	0.7452	0.6294	0.9759	0.828
TP53:132:01:ENST00000269305	6	OV	1	TP53	132	ENST00000269305	6	404	0.6072	1.3602	0.5425	0.9999	0.9879
ZEB2:1094:01:ENST00000409487	4	BLCA	1	ZEB2	1094	ENST00000409487	4	382	0.6101	0.5838	0.5916	0.7054	0.443
ARID1A:551:01:ENST00000324856	7	UCEC	1	ARID1A	551	ENST00000324856	5	469	0.6104	1.5493	0.6638	0.5489	0.3202
FUBP1:11:01:ENST00000370768	5	UCEC	1	FUBP1	11	ENST00000370768	4	470	0.6105	1.6523	0.618	0.9861	0.8654
PVRIG:79:01:ENST00000317271	8	UCEC	1	PVRIG	79	ENST00000317271	6	468	0.6108	0	0.9947	0.3251	0.1787
AHR:383:01:ENST00000242057	8	BLCA	1	AHR	383	ENST00000242057	7	379	0.6113	0.6833	0.5925	0.622	0.3655
NRAS:61:01:ENST00000369535	39	THCA	1	NRAS	61	ENST00000369535	39	451	0.6116	0	0.9977	0.0152	0.0072
NOP58:524:01:ENST00000264279	4	UCEC	1	NOP58	524	ENST00000264279	4	470	0.6133	1.6467	0.6207	0.9185	0.6928
FAM21C:516:01:ENST00000374362	5	UCEC	1	FAM21C	516	ENST00000374362	4	470	0.6136	0	0.9949	0.5877	0.346
PRKAA2:90:01:ENST00000371244	4	UCEC	1	PRKAA2	90	ENST00000371244	4	470	0.6143	1.6444	0.6215	1	0.9928
KIAA1024:702:01:ENST00000305428	8	COAD	1	KIAA1024	702	ENST00000305428	4	338	0.6147	0	0.9947	0.28	0.1687
PAX2:403:01:ENST00000428433	10	STAD	1	PAX2	403	ENST00000428433	5	364	0.6157	1.3287	0.6262	0.8072	0.4828
AADACL3:198:01:ENST00000626924	7	UCEC	1	AADACL3	198	ENST00000626924	5	469	0.6158	0	0.9946	0.4503	0.2532
TP53:282:01:ENST00000269305	7	LGG	1	TP53	282	ENST00000269305	7	492	0.6176	1.2726	0.6808	0.4617	0.1744
CMTM5:126:01:ENST00000339180	5	UCEC	1	CMTM5	126	ENST00000339180	4	470	0.6177	0	0.9949	0.9935	0.9088
TP53:261:01:ENST00000269305	5	OV	1	TP53	261	ENST00000269305	4	406	0.6182	1.4047	0.5594	0.9723	0.8055
PIK3CA:542:01:ENST00000263967	5	STAD	1	PIK3CA	542	ENST00000263967	4	365	0.6185	0.5896	0.599	0.9977	0.9465
TP53:158:01:ENST00000269305	4	LGG	1	TP53	158	ENST00000269305	4	495	0.6199	1.8632	0.5373	0.7676	0.4996
TP53:179:01:ENST00000269305	9	LGG	1	TP53	179	ENST00000269305	9	490	0.6199	1.5588	0.5356	0.5496	0.3085
TENM2:1070:06:ENST00000518659	4	SKCM	6	TENM2	1070	ENST00000518659	4	416	0.6202	1.3268	0.6274	0.6895	0.3316
FCRL3:272:01:ENST00000368184	7	COAD	1	FCRL3	272	ENST00000368184	4	338	0.6213	1.5928	0.6446	0.5885	0.3566
CPEB2:544:01:ENST00000507071	9	UCEC	1	CPEB2	544	ENST00000507071	8	466	0.6216	0.6106	0.6242	0.7566	0.4351
CAMSAP2:1437:01:ENST00000236925	7	COAD	1	CAMSAP2	1437	ENST00000236925	4	338	0.6231	0	0.9947	0.2446	0.1493
KCNA4:221:01:ENST00000328224	8	UCEC	1	KCNA4	221	ENST00000328224	6	468	0.624	0	0.9948	0.0719	0.0529
PPP1R36:167:01:ENST00000298705	4	UCEC	1	PPP1R36	167	ENST00000298705	4	470	0.624	0	0.9949	0.496	0.287
ZNF416:232:01:ENST00000196489	4	COAD	1	ZNF416	232	ENST00000196489	4	338	0.6241	1.5671	0.656	0.8151	0.5506
ZNF98:58:01:ENST00000357774	4	STAD	1	ZNF98	58	ENST00000357774	4	365	0.6243	1.4776	0.5838	0.8748	0.626
INPPL1:976:01:ENST00000298229	11	UCEC	1	INPPL1	976	ENST00000298229	11	463	0.6246	1.4323	0.6162	0.5926	0.3347
GRM8:720:01:ENST00000339582	7	UCEC	1	GRM8	720	ENST00000339582	6	468	0.6259	1.5742	0.653	0.2174	0.1287
MDGA2:334:01:ENST00000399232	8	STAD	1	MDGA2	334	ENST00000399232	4	365	0.6262	0.596	0.6061	0.8074	0.5382
TNRC18:1543:01:ENST00000430969	10	UCEC	1	TNRC18	1543	ENST00000430969	9	465	0.6262	0.5937	0.6045	0.969	0.7993
IDE:569:01:ENST00000265986	5	UCEC	1	IDE	569	ENST00000265986	5	469	0.6264	0	0.9947	0.2874	0.1637
NRAS:61:01:ENST00000369535	7	READ	1	NRAS	61	ENST00000369535	5	113	0.6279	1.7148	0.6024	0.7129	0.4455
SAFB2:945:01:ENST00000252542	4	UCEC	1	SAFB2	945	ENST00000252542	4	470	0.6286	1.6127	0.635	0.9438	0.7254
GSE1:123:01:ENST00000253458	8	UCEC	1	GSE1	123	ENST00000253458	7	467	0.6295	1.3381	0.687	0.6858	0.3573
SLC12A5:332:06:ENST00000454036	7	SKCM	6	SLC12A5	332	ENST00000454036	5	415	0.6298	0.7391	0.6708	0.9966	0.9339
PAX2:403:01:ENST00000428433	7	UCEC	1	PAX2	403	ENST00000428433	7	467	0.6301	0	0.995	0.0028	0.007
ATRX:1302:01:ENST00000373344	4	LGG	1	ATRX	1302	ENST00000373344	4	495	0.631	1.8253	0.5499	0.7732	0.5048
APPL1:154:01:ENST00000288266	5	UCEC	1	APPL1	154	ENST00000288266	5	469	0.6313	1.5117	0.6815	0.7345	0.4621
APC:1450:01:ENST00000257430	23	COAD	1	APC	1450	ENST00000257430	19	323	0.6323	1.2371	0.6461	0.9558	0.7699
FUBP1:83:01:ENST00000370768	5	LGG	1	FUBP1	83	ENST00000370768	5	494	0.6326	1.3125	0.7036	0.6824	0.3457
ERBB3:104:01:ENST00000267101	4	CESC	1	ERBB3	104	ENST00000267101	4	244	0.6327	0.6371	0.6552	0.7695	0.4411
HRAS:13:01:ENST00000311189	11	HNSC	1	HRAS	13	ENST00000311189	10	465	0.6334	1.3396	0.5633	0.2415	0.1359
TP53:173:01:ENST00000269305	7	HNSC	1	TP53	173	ENST00000269305	7	468	0.6337	0.7719	0.6612	0.6049	0.2793
NSD1:1531:01:ENST00000439151	14	UCEC	1	NSD1	1531	ENST00000439151	13	461	0.6365	0.5555	0.5591	0.5072	0.2706
SGOL1:315:01:ENST00000263753	7	UCEC	1	SGOL1	315	ENST00000263753	5	469	0.6371	0	0.9948	0.4519	0.2543
SLC12A7:686:01:ENST00000264930	5	UCEC	1	SLC12A7	686	ENST00000264930	5	469	0.6386	0	0.9948	0.2308	0.1349
DNAH7:346:01:ENST00000312428	5	UCEC	1	DNAH7	346	ENST00000312428	5	469	0.6388	0	0.9948	0.2995	0.1687
MBD6:734:01:ENST00000355673	7	UCEC	1	MBD6	734	ENST00000355673	5	469	0.64	0	0.9948	0.3413	0.1926
SPECC1:303:01:ENST00000261503	23	STAD	1	SPECC1	303	ENST00000261503	6	363	0.6407	1.2349	0.6777	0.5222	0.2043
CDH1:23:01:ENST00000261769	9	BRCA	1	CDH1	23	ENST00000261769	9	934	0.6421	0.6271	0.6424	0.9119	0.6593
ACVR2A:96:01:ENST00000241416	8	UCEC	1	ACVR2A	96	ENST00000241416	8	466	0.6424	0.6158	0.6301	0.9369	0.7115
HIST1H2AE:128:01:ENST00000303910	9	BRCA	1	HIST1H2AE	128	ENST00000303910	8	935	0.6427	1.7021	0.5969	0.4776	0.2607
AP3B1:923:01:ENST00000255194	5	UCEC	1	AP3B1	923	ENST00000255194	4	470	0.6428	1.563	0.6575	0.9413	0.7374
GATA3:408:01:ENST00000346208	14	BRCA	1	GATA3	408	ENST00000346208	12	931	0.6433	1.2295	0.7243	0.5229	0.2283
PCDH15:1522:06:ENST00000617271	4	SKCM	6	PCDH15	1522	ENST00000617271	4	416	0.6449	0.6272	0.642	0.5071	0.3016
TP53:331:01:ENST00000269305	7	LUSC	1	TP53	331	ENST00000269305	7	457	0.6452	0.555	0.5574	0.0131	0.0178
CLCN2:381:01:ENST00000265593	5	UCEC	1	CLCN2	381	ENST00000265593	5	469	0.6481	0	0.9948	0.7467	0.4707
SYNJ2:1113:01:ENST00000355585	7	UCEC	1	SYNJ2	1113	ENST00000355585	7	467	0.6482	1.8066	0.5575	0.0157	0.0204
DNAH11:4414:01:ENST00000409508	4	COAD	1	DNAH11	4414	ENST00000409508	4	338	0.6487	0	0.9947	0.3249	0.1886
CTNNB1:33:01:ENST00000349496	12	LIHC	1	CTNNB1	33	ENST00000349496	12	337	0.6497	1.2275	0.6542	0.9326	0.7069
MAGEE2:45:01:ENST00000373359	8	STAD	1	MAGEE2	45	ENST00000373359	4	365	0.6501	0.6111	0.6236	0.7042	0.4428
OAS2:426:01:ENST00000342315	6	UCEC	1	OAS2	426	ENST00000342315	4	470	0.6502	0	0.995	0.4373	0.2517
TPTE:423:06:ENST00000618007	5	SKCM	6	TPTE	423	ENST00000618007	4	416	0.6505	1.2937	0.6585	0.6147	0.2605
APC:499:01:ENST00000257430	7	COAD	1	APC	499	ENST00000257430	6	336	0.6509	0.6407	0.6585	0.996	0.9318
C8orf89:153:01:ENST00000624510	4	UCEC	1	C8orf89	153	ENST00000624510	4	470	0.6512	0	0.995	0.4986	0.2866
APC:1450:01:ENST00000257430	7	READ	1	APC	1450	ENST00000257430	5	113	0.6513	1.6628	0.6249	0.9858	0.8682
KIAA1024:702:01:ENST00000305428	14	UCEC	1	KIAA1024	702	ENST00000305428	10	464	0.6522	1.3473	0.6773	0.7604	0.4756
MKI67:1857:01:ENST00000368654	7	UCEC	1	MKI67	1857	ENST00000368654	7	467	0.6539	0.6424	0.6617	0.5846	0.2712
CIC:1512:01:ENST00000575354	6	LGG	1	CIC	1512	ENST00000575354	6	493	0.6542	0	0.9951	0.0168	0.0211
USP40:1147:01:ENST00000251722	4	UCEC	1	USP40	1147	ENST00000251722	4	470	0.6543	1.5588	0.6594	0.9588	0.7786
TMC2:430:06:ENST00000358864	5	SKCM	6	TMC2	430	ENST00000358864	4	416	0.6546	0.7756	0.7211	0.9653	0.7842
CSMD3:258:06:ENST00000297405	5	SKCM	6	CSMD3	258	ENST00000297405	4	416	0.6547	1.5041	0.5666	0.8559	0.6027
TP53:213:01:ENST00000269305	6	STAD	1	TP53	213	ENST00000269305	6	363	0.6547	1.317	0.6372	0.9865	0.867
TP53:286:01:ENST00000269305	5	LUAD	1	TP53	286	ENST00000269305	5	474	0.6553	1.4437	0.6066	0.9785	0.8392
GUCA1C:39:06:ENST00000261047	4	SKCM	6	GUCA1C	39	ENST00000261047	4	416	0.6553	0.8292	0.7547	0.4296	0.1284
CTNNB1:41:01:ENST00000349496	6	LIHC	1	CTNNB1	41	ENST00000349496	6	343	0.6556	0.5924	0.6023	0.6065	0.3544
DGKD:855:01:ENST00000264057	6	UCEC	1	DGKD	855	ENST00000264057	5	469	0.656	1.4573	0.7084	0.9663	0.7984
TRAM1L1:345:01:ENST00000310754	4	UCEC	1	TRAM1L1	345	ENST00000310754	4	470	0.657	1.553	0.662	0.947	0.734
TP53:242:01:ENST00000269305	6	LUSC	1	TP53	242	ENST00000269305	5	459	0.6585	0.7528	0.6898	0.9649	0.7843
BZW1:285:01:ENST00000409600	9	UCEC	1	BZW1	285	ENST00000409600	6	468	0.6599	1.449	0.7126	0.655	0.3907
PIK3CA:108:01:ENST00000263967	9	UCEC	1	PIK3CA	108	ENST00000263967	6	468	0.66	0.6367	0.6554	0.5067	0.2095
ZNF124:339:01:ENST00000543802	8	UCEC	1	ZNF124	339	ENST00000543802	6	468	0.6612	1.4454	0.7147	0.2875	0.1643
WDR87:2720:01:ENST00000303868	5	UCEC	1	WDR87	2720	ENST00000303868	5	469	0.6619	0	0.9949	0.2116	0.1254
TP53:331:01:ENST00000269305	9	BLCA	1	TP53	331	ENST00000269305	7	379	0.6625	0.7175	0.6408	0.3755	0.2104
KRAS:12:01:ENST00000256078	5	OV	1	KRAS	12	ENST00000256078	5	405	0.6626	1.2746	0.6309	0.7655	0.4174
PRAMEF18:159:06:ENST00000624297	7	SKCM	6	PRAMEF18	159	ENST00000624297	4	416	0.6634	1.4852	0.5785	0.8463	0.5908
HRAS:61:01:ENST00000311189	16	PCPG	1	HRAS	61	ENST00000311189	16	163	0.6635	0	0.9988	0.7569	0.4674
RB1:405:01:ENST00000267163	4	BLCA	1	RB1	405	ENST00000267163	4	382	0.6638	1.446	0.6044	0.9399	0.7361
CTNNB1:45:01:ENST00000349496	17	LIHC	1	CTNNB1	45	ENST00000349496	16	333	0.6641	0.8236	0.6715	0.9987	0.9575
PIK3CA:542:01:ENST00000263967	18	BLCA	1	PIK3CA	542	ENST00000263967	15	371	0.6642	0.8569	0.6893	0.8155	0.509
HIAT1:269:01:ENST00000370152	6	UCEC	1	HIAT1	269	ENST00000370152	6	468	0.6642	0	0.9952	0.4957	0.2758
RABGAP1:930:01:ENST00000373647	6	UCEC	1	RABGAP1	930	ENST00000373647	4	470	0.6642	0	0.9951	0.6818	0.4145
TP53:136:01:ENST00000269305	5	HNSC	1	TP53	136	ENST00000269305	5	470	0.6652	1.2754	0.6763	0.9293	0.6893
ARID1A:1850:01:ENST00000324856	15	STAD	1	ARID1A	1850	ENST00000324856	10	359	0.6653	0.8429	0.7079	0.2865	0.0823
RAC1:29:06:ENST00000348035	18	SKCM	6	RAC1	29	ENST00000348035	13	407	0.6659	1.2371	0.6091	0.6398	0.3735
METTL14:298:01:ENST00000388822	4	UCEC	1	METTL14	298	ENST00000388822	4	470	0.667	0	0.9951	0.7545	0.481
PIK3CA:118:01:ENST00000263967	5	BRCA	1	PIK3CA	118	ENST00000263967	5	938	0.6672	1.5864	0.6464	0.963	0.78
FUT9:7:06:ENST00000302103	4	SKCM	6	FUT9	7	ENST00000302103	4	416	0.668	0.7843	0.7326	0.8914	0.6134
TP53:196:01:ENST00000269305	9	HNSC	1	TP53	196	ENST00000269305	8	467	0.6685	0.7866	0.6801	0.9996	0.9789
TP53:242:01:ENST00000269305	5	BRCA	1	TP53	242	ENST00000269305	5	938	0.6686	1.581	0.6486	0.994	0.9116
KRAS:13:01:ENST00000256078	8	LUAD	1	KRAS	13	ENST00000256078	8	471	0.6688	0.8023	0.7054	0.8204	0.5106
TTK:854:01:ENST00000369798	8	UCEC	1	TTK	854	ENST00000369798	8	466	0.6702	1.3192	0.699	0.9485	0.7391
IGSF9:52:01:ENST00000368094	5	UCEC	1	IGSF9	52	ENST00000368094	5	469	0.6706	1.4283	0.7234	0.9787	0.8339
SHPRH:166:01:ENST00000275233	9	UCEC	1	SHPRH	166	ENST00000275233	8	466	0.6709	0.6353	0.6529	0.9572	0.7641
TP53:273:01:ENST00000269305	8	BLCA	1	TP53	273	ENST00000269305	7	379	0.6726	1.246	0.6639	0.9489	0.7384
SMAD4:361:01:ENST00000342988	4	READ	1	SMAD4	361	ENST00000342988	4	114	0.6726	1.6807	0.6171	0.9726	0.8116
SGOL1:314:01:ENST00000263753	5	UCEC	1	SGOL1	314	ENST00000263753	5	469	0.6728	0	0.995	0.355	0.1998
PIK3CA:1047:01:ENST00000263967	6	LGG	1	PIK3CA	1047	ENST00000263967	6	493	0.6756	1.2982	0.7151	0.9436	0.7259
IDH2:146:01:ENST00000330062	4	UCEC	1	IDH2	146	ENST00000330062	4	470	0.6759	0	0.9951	0.7607	0.4873
TP53:158:01:ENST00000269305	7	LUAD	1	TP53	158	ENST00000269305	5	474	0.6767	0.7749	0.7205	0.429	0.1507
FGFR2:252:01:ENST00000358487	22	UCEC	1	FGFR2	252	ENST00000358487	22	452	0.6767	1.2387	0.6765	0.6005	0.3319
ZNF609:734:01:ENST00000326648	9	UCEC	1	ZNF609	734	ENST00000326648	7	467	0.6774	1.6006	0.6412	0.0434	0.0371
APC:805:01:ENST00000257430	7	COAD	1	APC	805	ENST00000257430	5	337	0.6778	0.6612	0.6815	0.664	0.3341
NRIP1:729:01:ENST00000318948	5	UCEC	1	NRIP1	729	ENST00000318948	4	470	0.6781	0	0.9951	0.5295	0.3077
APC:564:01:ENST00000257430	6	COAD	1	APC	564	ENST00000257430	4	338	0.6782	1.4748	0.7001	0.699	0.4391
FBXW7:367:01:ENST00000281708	5	COAD	1	FBXW7	367	ENST00000281708	4	338	0.6783	0	0.9949	0.0613	0.0573
PPP2R1A:183:01:ENST00000322088	9	UCEC	1	PPP2R1A	183	ENST00000322088	8	466	0.6789	0.6444	0.6624	0.971	0.8121
RTF1:236:01:ENST00000389629	4	OV	1	RTF1	236	ENST00000389629	4	406	0.6793	0.6527	0.6705	0.2286	0.152
CHD9:760:01:ENST00000398510	5	UCEC	1	CHD9	760	ENST00000398510	4	470	0.6806	0	0.9951	0.8939	0.6498
ANKRD26:1234:01:ENST00000376087	5	UCEC	1	ANKRD26	1234	ENST00000376087	4	470	0.6807	1.5075	0.6835	0.9988	0.9614
ATP2A1:571:01:ENST00000357084	6	UCEC	1	ATP2A1	571	ENST00000357084	4	470	0.6809	0	0.9951	0.9003	0.6595
CHST4:7:01:ENST00000338482	4	UCEC	1	CHST4	7	ENST00000338482	4	470	0.6811	1.5068	0.6838	0.999	0.9647
PTPRT:1075:01:ENST00000373187	6	COAD	1	PTPRT	1075	ENST00000373187	4	338	0.6815	0	0.9949	0.213	0.1351
SMC3:43:01:ENST00000361804	4	UCEC	1	SMC3	43	ENST00000361804	4	470	0.6822	1.5049	0.6848	0.987	0.8739
TP53:294:01:ENST00000269305	4	HNSC	1	TP53	294	ENST00000269305	4	471	0.6824	0.6341	0.6497	0.4642	0.2763
TBX2:138:01:ENST00000240328	4	UCEC	1	TBX2	138	ENST00000240328	4	470	0.6838	1.5018	0.6863	0.9853	0.8607
PIK3R1:457:01:ENST00000521381	5	UCEC	1	PIK3R1	457	ENST00000521381	5	469	0.6844	0	0.995	0.2841	0.1627
PIK3CA:542:01:ENST00000263967	23	CESC	1	PIK3CA	542	ENST00000263967	16	232	0.6854	0.8145	0.6917	0.9579	0.7653
PPP2R1A:257:01:ENST00000322088	4	UCEC	1	PPP2R1A	257	ENST00000322088	4	470	0.6858	1.4983	0.688	0.9906	0.8917
NRAS:12:01:ENST00000369535	7	COAD	1	NRAS	12	ENST00000369535	6	336	0.6859	0.6628	0.6838	0.6929	0.367
PIK3CA:1043:01:ENST00000263967	10	UCEC	1	PIK3CA	1043	ENST00000263967	7	467	0.6861	0.6653	0.6871	0.3972	0.1398
TP53:176:01:ENST00000269305	9	OV	1	TP53	176	ENST00000269305	8	402	0.6869	0.8384	0.7269	0.9282	0.709
HRAS:61:01:ENST00000311189	17	THCA	1	HRAS	61	ENST00000311189	17	473	0.6884	1.7406	0.5939	0.9239	0.6849
CHD4:1105:01:ENST00000357008	11	UCEC	1	CHD4	1105	ENST00000357008	10	464	0.6887	1.2984	0.7156	0.7951	0.5151
SBF1:1077:01:ENST00000380817	4	UCEC	1	SBF1	1077	ENST00000380817	4	470	0.6889	1.4921	0.691	0.9215	0.6755
TRRAP:722:06:ENST00000359863	7	SKCM	6	TRRAP	722	ENST00000359863	6	414	0.6891	0.8245	0.7405	0.87	0.5811
FXR2:540:01:ENST00000250113	4	UCEC	1	FXR2	540	ENST00000250113	4	470	0.6893	0	0.9951	0.4106	0.2369
MGAM:1091:06:ENST00000549489	4	SKCM	6	MGAM	1091	ENST00000549489	4	416	0.6902	1.1842	0.7407	0.1605	0.0072
KDM6A:555:01:ENST00000377967	8	BLCA	1	KDM6A	555	ENST00000377967	8	378	0.6919	0.8382	0.7272	0.7717	0.4472
PPP2R3B:389:01:ENST00000390665	5	UCEC	1	PPP2R3B	389	ENST00000390665	5	469	0.6921	1.3879	0.745	0.7168	0.4478
TCF12:183:01:ENST00000267811	7	STAD	1	TCF12	183	ENST00000267811	4	365	0.6923	1.3577	0.6678	0.956	0.7719
LRRC9:647:01:ENST00000445360	4	UCEC	1	LRRC9	647	ENST00000445360	4	470	0.6927	1.4854	0.6943	0.872	0.584
ERBB2:678:01:ENST00000269571	4	STAD	1	ERBB2	678	ENST00000269571	4	365	0.6949	0.7797	0.7284	0.4478	0.1537
LMAN1:275:01:ENST00000251047	4	UCEC	1	LMAN1	275	ENST00000251047	4	470	0.6951	0	0.9952	0.3627	0.2096
MIS18BP1:690:01:ENST00000310806	4	UCEC	1	MIS18BP1	690	ENST00000310806	4	470	0.6954	0	0.9952	0.3405	0.197
PPM1D:512:01:ENST00000305921	4	UCEC	1	PPM1D	512	ENST00000305921	4	470	0.6957	0	0.9952	0.4559	0.262
PLCB4:876:06:ENST00000278655	4	SKCM	6	PLCB4	876	ENST00000278655	4	416	0.6961	0.8019	0.7562	0.9195	0.6682
APC:1556:01:ENST00000257430	12	COAD	1	APC	1556	ENST00000257430	9	333	0.699	1.192	0.7669	0.6841	0.3582
ISM1:194:01:ENST00000262487	4	UCEC	1	ISM1	194	ENST00000262487	4	470	0.6993	0	0.9952	0.7827	0.5102
PIK3CA:545:01:ENST00000263967	35	COAD	1	PIK3CA	545	ENST00000263967	31	311	0.6996	0.8435	0.6893	0.9837	0.8597
PSG4:263:06:ENST00000405312	4	SKCM	6	PSG4	263	ENST00000405312	4	416	0.6998	1.2455	0.7063	0.5982	0.2462
PRCC:380:01:ENST00000271526	6	UCEC	1	PRCC	380	ENST00000271526	6	468	0.6999	1.3425	0.7699	0.4929	0.2793
C6orf165:477:01:ENST00000369562	4	UCEC	1	C6orf165	477	ENST00000369562	4	470	0.7016	0	0.9952	0.4462	0.2573
AOC1:741:01:ENST00000360937	5	UCEC	1	AOC1	741	ENST00000360937	5	469	0.7037	1.3675	0.7559	0.9768	0.8324
INPPL1:1156:01:ENST00000298229	15	UCEC	1	INPPL1	1156	ENST00000298229	15	459	0.7042	0.7374	0.6705	0.9455	0.7402
KRAS:12:01:ENST00000256078	5	KIRP	1	KRAS	12	ENST00000256078	5	273	0.7048	0	0.997	0.3605	0.2022
TFPI2:222:01:ENST00000222543	5	BLCA	1	TFPI2	222	ENST00000222543	4	382	0.7053	0.6546	0.673	0.3787	0.2273
APC:941:01:ENST00000257430	4	COAD	1	APC	941	ENST00000257430	4	338	0.7058	0	0.9951	0.0217	0.0321
TP53:248:01:ENST00000269305	19	COAD	1	TP53	248	ENST00000269305	19	323	0.7058	0.8199	0.6993	0.8807	0.614
CHD4:975:01:ENST00000357008	6	UCEC	1	CHD4	975	ENST00000357008	6	468	0.7063	1.3283	0.778	0.4247	0.2385
FLT3:835:03:ENST00000241453	10	LAML	3	FLT3	835	ENST00000241453	9	109	0.7064	1.2015	0.6671	0.6834	0.4237
C9orf131:344:01:ENST00000312292	6	UCEC	1	C9orf131	344	ENST00000312292	6	468	0.7067	0.6851	0.7073	0.7848	0.4649
SPHKAP:954:06:ENST00000392056	4	SKCM	6	SPHKAP	954	ENST00000392056	4	416	0.7071	0.8087	0.7653	0.9419	0.7191
HERC2:1135:01:ENST00000261609	5	UCEC	1	HERC2	1135	ENST00000261609	4	470	0.7071	0	0.9952	0.7075	0.439
GATA3:308:01:ENST00000346208	21	BRCA	1	GATA3	308	ENST00000346208	20	923	0.7081	0.8514	0.7522	0.1508	0.0368
TP53:179:01:ENST00000269305	4	STAD	1	TP53	179	ENST00000269305	4	365	0.7103	0.6552	0.6737	0.9159	0.6883
CCND1:291:01:ENST00000227507	5	UCEC	1	CCND1	291	ENST00000227507	5	469	0.7112	1.3546	0.763	0.9143	0.682
ARID1A:1850:01:ENST00000324856	18	UCEC	1	ARID1A	1850	ENST00000324856	17	457	0.712	1.2345	0.7207	0.3886	0.1961
TRIM51:144:01:ENST00000449290	11	STAD	1	TRIM51	144	ENST00000449290	4	365	0.7143	1.3247	0.6937	0.8316	0.5174
TP53:245:01:ENST00000269305	4	COAD	1	TP53	245	ENST00000269305	4	338	0.7155	0	0.9952	0.024	0.0347
TP53:273:01:ENST00000269305	10	LUAD	1	TP53	273	ENST00000269305	5	474	0.7166	1.3255	0.6925	0.9764	0.8303
TP53:176:01:ENST00000269305	4	ESCA	1	TP53	176	ENST00000269305	4	173	0.717	1.1996	0.7586	0.3641	0.0935
PTPRT:1266:06:ENST00000373187	4	SKCM	6	PTPRT	1266	ENST00000373187	4	416	0.717	1.3847	0.6474	0.8933	0.6541
ARID1A:2141:01:ENST00000324856	6	UCEC	1	ARID1A	2141	ENST00000324856	6	468	0.7176	0.692	0.7161	0.7601	0.4366
GNA13:200:01:ENST00000439174	6	BLCA	1	GNA13	200	ENST00000439174	6	380	0.7181	0.8313	0.7513	0.9579	0.7641
OR2W1:122:01:ENST00000377175	5	SKCM	1	OR2W1	122	ENST00000377175	5	415	0.7181	2.6017	0.3441	0	0.0011
TP53:272:01:ENST00000269305	6	OV	1	TP53	272	ENST00000269305	6	404	0.7187	0.8375	0.7614	0.7706	0.4459
TP53:213:01:ENST00000269305	5	LGG	1	TP53	213	ENST00000269305	5	494	0.7189	1.56	0.6586	0.5354	0.3107
TP53:241:01:ENST00000269305	7	OV	1	TP53	241	ENST00000269305	6	404	0.7198	0.8741	0.7898	0.8475	0.5407
ACTN4:874:01:ENST00000252699	4	UCEC	1	ACTN4	874	ENST00000252699	4	470	0.72	1.4365	0.719	0.9338	0.7014
TP53:193:01:ENST00000269305	9	BRCA	1	TP53	193	ENST00000269305	9	934	0.7202	0	0.993	0.021	0.019
ISX:86:06:ENST00000308700	6	SKCM	6	ISX	86	ENST00000308700	4	416	0.7212	1.3783	0.6524	0.9233	0.7036
VPS33A:459:01:ENST00000267199	4	UCEC	1	VPS33A	459	ENST00000267199	4	470	0.723	0	0.9953	0.6265	0.3751
UBR5:2121:01:ENST00000520539	25	STAD	1	UBR5	2121	ENST00000520539	8	361	0.7234	1.195	0.7255	0.9976	0.9434
MED12:521:01:ENST00000374080	6	UCEC	1	MED12	521	ENST00000374080	5	469	0.724	0	0.9953	0.097	0.0699
CXCR2:322:06:ENST00000318507	5	SKCM	6	CXCR2	322	ENST00000318507	4	416	0.7251	0.8641	0.8079	0.4493	0.1402
INTU:661:01:ENST00000335251	4	UCEC	1	INTU	661	ENST00000335251	4	470	0.7264	0	0.9953	0.6588	0.3997
TP53:105:01:ENST00000269305	5	LUSC	1	TP53	105	ENST00000269305	5	459	0.7271	0.8543	0.787	0.4178	0.1345
ALX4:339:01:ENST00000329255	6	UCEC	1	ALX4	339	ENST00000329255	5	469	0.7282	1.313	0.7869	0.7434	0.4714
WDR55:341:01:ENST00000358337	11	UCEC	1	WDR55	341	ENST00000358337	9	465	0.7285	0.6481	0.6666	0.7787	0.4949
SEZ6:306:01:ENST00000317338	4	UCEC	1	SEZ6	306	ENST00000317338	4	470	0.7295	0	0.9953	0.4505	0.2585
HBD:48:06:ENST00000380299	5	SKCM	6	HBD	48	ENST00000380299	4	416	0.7302	0.8235	0.7849	0.938	0.7098
APC:1397:01:ENST00000257430	6	COAD	1	APC	1397	ENST00000257430	6	336	0.7304	1.1804	0.8174	0.6481	0.3203
VWC2:258:06:ENST00000340652	4	SKCM	6	VWC2	258	ENST00000340652	4	416	0.7309	0.8237	0.7853	0.9681	0.7931
HRAS:13:01:ENST00000311189	4	BLCA	1	HRAS	13	ENST00000311189	4	382	0.7312	1.3193	0.6971	0.9276	0.7119
PIK3CA:1047:01:ENST00000263967	15	HNSC	1	PIK3CA	1047	ENST00000263967	14	461	0.7314	0.8539	0.7274	0.7268	0.4411
SOHLH2:85:01:ENST00000379881	4	STAD	1	SOHLH2	85	ENST00000379881	4	365	0.7319	0.6727	0.6929	0.342	0.2086
SPOP:87:01:ENST00000347630	7	PRAD	1	SPOP	87	ENST00000347630	7	483	0.7321	0	0.9981	0.5943	0.3409
NBN:466:01:ENST00000265433	4	UCEC	1	NBN	466	ENST00000265433	4	470	0.7321	1.4159	0.7298	0.9964	0.9308
DOCK8:1113:01:ENST00000432829	10	UCEC	1	DOCK8	1113	ENST00000432829	6	468	0.7352	0.7051	0.7285	0.8157	0.5052
GUF1:645:01:ENST00000281543	4	UCEC	1	GUF1	645	ENST00000281543	4	470	0.7352	1.3971	0.7398	0.9796	0.8392
PIK3CA:345:01:ENST00000263967	5	STAD	1	PIK3CA	345	ENST00000263967	4	365	0.7355	1.294	0.7176	0.9589	0.7804
SIGLEC7:124:06:ENST00000317643	4	SKCM	6	SIGLEC7	124	ENST00000317643	4	416	0.7357	0.8272	0.7897	0.9233	0.6764
SP140:672:01:ENST00000392045	7	UCEC	1	SP140	672	ENST00000392045	5	469	0.7362	1.3142	0.7861	0.9405	0.7347
CCDC108:1165:01:ENST00000341552	6	UCEC	1	CCDC108	1165	ENST00000341552	6	468	0.7367	1.2575	0.8201	0.4344	0.2427
NOL6:639:01:ENST00000297990	4	UCEC	1	NOL6	639	ENST00000297990	4	470	0.737	0	0.9953	0.6225	0.3716
RBM39:353:01:ENST00000253363	6	UCEC	1	RBM39	353	ENST00000253363	6	468	0.7387	1.2616	0.8175	0.5782	0.334
KRAS:12:01:ENST00000256078	5	BRCA	1	KRAS	12	ENST00000256078	5	938	0.7395	1.3788	0.7492	0.9769	0.8249
PLOD3:293:01:ENST00000223127	5	UCEC	1	PLOD3	293	ENST00000223127	5	469	0.74	0	0.9955	0.1804	0.1115
TEX10:5:01:ENST00000374902	5	UCEC	1	TEX10	5	ENST00000374902	4	470	0.7409	1.4008	0.7378	0.993	0.9069
NRAS:61:01:ENST00000369535	16	SKCM	1	NRAS	61	ENST00000369535	15	405	0.7414	1.4644	0.5169	0	0
TP53:248:01:ENST00000269305	11	READ	1	TP53	248	ENST00000269305	8	110	0.7417	1.1736	0.8305	0.7386	0.4156
TP53:336:01:ENST00000269305	5	BLCA	1	TP53	336	ENST00000269305	5	381	0.7419	0.7978	0.751	0.9073	0.6733
DDX27:691:01:ENST00000371764	9	UCEC	1	DDX27	691	ENST00000371764	8	466	0.7422	0.682	0.7037	0.9672	0.8004
SLCO5A1:222:01:ENST00000260126	4	UCEC	1	SLCO5A1	222	ENST00000260126	4	470	0.7427	1.3978	0.7395	0.9903	0.89
RNF43:659:01:ENST00000407977	39	UCEC	1	RNF43	659	ENST00000407977	34	440	0.7428	0.8182	0.6958	0.1632	0.0714
TP53:213:01:ENST00000269305	11	HNSC	1	TP53	213	ENST00000269305	11	464	0.7436	1.1421	0.7503	0.4849	0.1954
SEC16A:2066:01:ENST00000313050	4	UCEC	1	SEC16A	2066	ENST00000313050	4	470	0.7437	0	0.9953	0.2999	0.1779
WWC2:206:01:ENST00000403733	6	UCEC	1	WWC2	206	ENST00000403733	5	469	0.7438	0	0.9955	0.0796	0.0616
MYT1L:474:06:ENST00000399161	4	SKCM	6	MYT1L	474	ENST00000399161	4	416	0.7488	0.8356	0.8007	0.9548	0.753
ZNF28:260:01:ENST00000457749	4	OV	1	ZNF28	260	ENST00000457749	4	406	0.749	0.8868	0.8364	0.7855	0.4428
PIK3CA:546:01:ENST00000263967	19	UCEC	1	PIK3CA	546	ENST00000263967	18	456	0.7491	0.8172	0.7318	0.9274	0.6936
RET:918:01:ENST00000355710	4	PCPG	1	RET	918	ENST00000355710	4	175	0.7506	0	0.9987	0.3851	0.2221
SRRT:105:01:ENST00000611405	5	UCEC	1	SRRT	105	ENST00000611405	4	470	0.7511	1.3839	0.747	0.9947	0.9173
ERCC2:238:01:ENST00000391945	9	BLCA	1	ERCC2	238	ENST00000391945	8	378	0.7513	0.8304	0.7498	0.9454	0.7442
KRT5:310:01:ENST00000252242	5	HNSC	1	KRT5	310	ENST00000252242	4	471	0.7514	1.1816	0.7747	0.2463	0.0433
C8orf34:256:06:ENST00000518698	4	SKCM	6	C8orf34	256	ENST00000518698	4	416	0.7514	0.8848	0.8337	0.3591	0.0897
IDH1:132:01:ENST00000345146	4	SKCM	1	IDH1	132	ENST00000345146	4	416	0.7525	1.9614	0.5041	0.0066	0.0246
COL21A1:695:06:ENST00000244728	5	SKCM	6	COL21A1	695	ENST00000244728	5	415	0.7532	0.8723	0.8146	0.6507	0.3088
FBXW7:465:01:ENST00000281708	6	CESC	1	FBXW7	465	ENST00000281708	5	243	0.7539	0.7057	0.7299	0.9732	0.8203
EPN2:470:01:ENST00000314728	4	UCEC	1	EPN2	470	ENST00000314728	4	470	0.7541	0	0.9954	0.292	0.1726
CP:1:01:ENST00000264613	6	UCEC	1	CP	1	ENST00000264613	5	469	0.7561	1.2845	0.8036	0.8957	0.6492
PIGO:731:01:ENST00000378617	5	UCEC	1	PIGO	731	ENST00000378617	4	470	0.7561	0	0.9954	0.439	0.2528
ZNF804A:814:01:ENST00000302277	4	COAD	1	ZNF804A	814	ENST00000302277	4	338	0.7566	0.6771	0.7002	0.6022	0.2736
CEP76:99:01:ENST00000262127	7	UCEC	1	CEP76	99	ENST00000262127	5	469	0.7581	0	0.9956	0.02	0.0264
CEP290:212:01:ENST00000552810	10	STAD	1	CEP290	212	ENST00000552810	4	365	0.7582	0.6945	0.7166	0.3304	0.2026
BRAF:466:01:ENST00000288602	6	LUAD	1	BRAF	466	ENST00000288602	4	475	0.7584	0.8355	0.801	0.5038	0.1899
FBXW7:465:01:ENST00000281708	16	UCEC	1	FBXW7	465	ENST00000281708	13	461	0.7589	0.7837	0.7337	0.8938	0.6278
ERBB2:842:01:ENST00000269571	6	UCEC	1	ERBB2	842	ENST00000269571	5	469	0.759	1.2824	0.8056	0.9779	0.8305
FAHD2A:281:01:ENST00000233379	7	UCEC	1	FAHD2A	281	ENST00000233379	7	467	0.7593	0.7197	0.7438	0.9973	0.9418
ATRX:1426:01:ENST00000373344	6	LGG	1	ATRX	1426	ENST00000373344	6	493	0.7624	0.7238	0.7478	0.9572	0.7726
MYD88:265:01:ENST00000396334	4	DLBC	1	MYD88	265	ENST00000396334	4	30	0.7632	0	0.9987	0.3323	0.1854
NES:393:01:ENST00000368223	6	UCEC	1	NES	393	ENST00000368223	5	469	0.7641	1.2727	0.8107	0.9444	0.7392
FGFR3:370:01:ENST00000260795	4	BLCA	1	FGFR3	370	ENST00000260795	4	382	0.7644	1.7496	0.5781	0.0001	0.0063
CDKN2A:114:06:ENST00000304494	9	SKCM	6	CDKN2A	114	ENST00000304494	6	414	0.7645	0.8661	0.8052	0.9609	0.7724
KIAA1429:721:01:ENST00000297591	9	UCEC	1	KIAA1429	721	ENST00000297591	7	467	0.7648	0.723	0.7475	0.8395	0.5391
CDKN2A:83:01:ENST00000304494	5	PAAD	1	CDKN2A	83	ENST00000304494	5	171	0.765	1.2288	0.726	0.9979	0.9473
TBCK:457:01:ENST00000273980	6	UCEC	1	TBCK	457	ENST00000273980	5	469	0.7664	1.2698	0.8125	0.8501	0.5868
PEAK1:871:01:ENST00000312493	5	UCEC	1	PEAK1	871	ENST00000312493	4	470	0.7665	0	0.9954	0.438	0.2495
MUC4:3516:01:ENST00000463781	6	KIRP	1	MUC4	3516	ENST00000463781	6	272	0.7675	0.6893	0.7148	0.4948	0.2015
BCOR:1459:01:ENST00000378444	24	UCEC	1	BCOR	1459	ENST00000378444	21	453	0.7684	1.1451	0.7917	0.9365	0.7197
ASTN1:502:06:ENST00000361833	7	SKCM	6	ASTN1	502	ENST00000361833	4	416	0.7687	0.8486	0.8179	0.889	0.6093
TP53:220:01:ENST00000269305	7	UCEC	1	TP53	220	ENST00000269305	7	467	0.769	0.7255	0.7502	0.783	0.4649
TP53:157:01:ENST00000269305	5	OV	1	TP53	157	ENST00000269305	5	405	0.7692	0.8356	0.8005	0.5867	0.3531
XRN1:1611:01:ENST00000264951	5	COAD	1	XRN1	1611	ENST00000264951	4	338	0.7696	0.6954	0.7186	0.4808	0.1858
CHD4:1162:01:ENST00000357008	6	UCEC	1	CHD4	1162	ENST00000357008	6	468	0.7697	1.2074	0.8515	0.5974	0.3483
PIK3CA:88:01:ENST00000263967	10	COAD	1	PIK3CA	88	ENST00000263967	5	337	0.7717	1.23	0.8374	0.5775	0.3414
MUC4:3516:01:ENST00000463781	7	UCEC	1	MUC4	3516	ENST00000463781	6	468	0.7723	0.746	0.771	0.7319	0.4042
PIK3R1:376:01:ENST00000521381	6	GBM	1	PIK3R1	376	ENST00000521381	4	356	0.7726	1.2156	0.6988	0.6668	0.2047
CDC25C:244:01:ENST00000323760	4	UCEC	1	CDC25C	244	ENST00000323760	4	470	0.7737	0	0.9955	0.2886	0.1718
PER3:316:06:ENST00000361923	5	SKCM	6	PER3	316	ENST00000361923	4	416	0.7746	1.1787	0.7777	0.578	0.2294
ARHGAP22:445:01:ENST00000249601	4	UCEC	1	ARHGAP22	445	ENST00000249601	4	470	0.7749	0	0.9955	0.4496	0.2588
CTNNB1:32:01:ENST00000349496	17	LIHC	1	CTNNB1	32	ENST00000349496	17	332	0.7752	1.1557	0.7519	0.4648	0.2437
NLRP13:416:06:ENST00000342929	6	SKCM	6	NLRP13	416	ENST00000342929	4	416	0.776	1.2904	0.7201	0.9563	0.7724
TP53:273:01:ENST00000269305	59	LGG	1	TP53	273	ENST00000269305	59	440	0.7777	1.0888	0.7659	0.9281	0.7026
CDKN2A:80:06:ENST00000304494	4	SKCM	6	CDKN2A	80	ENST00000304494	4	416	0.7799	1.285	0.7247	0.932	0.72
CTNNB1:45:01:ENST00000349496	5	UCEC	1	CTNNB1	45	ENST00000349496	4	470	0.7801	1.3361	0.7735	0.9777	0.8281
IDH1:132:03:ENST00000345146	7	LAML	3	IDH1	132	ENST00000345146	7	111	0.781	0.9028	0.8254	0.9808	0.8376
MYO3A:1192:01:ENST00000265944	8	UCEC	1	MYO3A	1192	ENST00000265944	7	467	0.782	0.7351	0.7599	0.7862	0.4692
BRAF:469:01:ENST00000288602	8	LUAD	1	BRAF	469	ENST00000288602	7	472	0.7828	0.8685	0.8092	0.7531	0.4251
ZCCHC11:58:01:ENST00000371544	6	UCEC	1	ZCCHC11	58	ENST00000371544	4	470	0.7835	0	0.9955	0.3655	0.2116
APC:1429:01:ENST00000257430	4	COAD	1	APC	1429	ENST00000257430	4	338	0.7836	1.3105	0.7885	0.889	0.6468
TP53:220:01:ENST00000269305	5	ESCA	1	TP53	220	ENST00000269305	4	173	0.7836	1.568	0.657	0.06	0.0646
C11orf57:160:01:ENST00000280352	7	UCEC	1	C11orf57	160	ENST00000280352	7	467	0.7845	0.7371	0.7618	0.9744	0.8166
TP53:159:01:ENST00000269305	4	BLCA	1	TP53	159	ENST00000269305	4	382	0.7848	1.2473	0.7565	0.8498	0.5952
TP53:195:01:ENST00000269305	12	OV	1	TP53	195	ENST00000269305	12	398	0.7855	1.1627	0.7157	0.5559	0.3153
TP53:205:01:ENST00000269305	4	LUAD	1	TP53	205	ENST00000269305	4	475	0.7859	1.4492	0.7123	0.1128	0.0943
CTNNB1:45:01:ENST00000349496	7	COAD	1	CTNNB1	45	ENST00000349496	5	337	0.7865	1.2101	0.8501	0.8155	0.5485
DOCK3:1852:01:ENST00000266037	31	UCEC	1	DOCK3	1852	ENST00000266037	28	446	0.7881	0.8134	0.7259	0.055	0.0259
GLI1:274:01:ENST00000228682	6	UCEC	1	GLI1	274	ENST00000228682	5	469	0.7898	1.2373	0.8325	0.9699	0.8089
ABCB1:467:01:ENST00000265724	4	UCEC	1	ABCB1	467	ENST00000265724	4	470	0.791	1.3187	0.7835	0.9995	0.9744
NRD1:206:01:ENST00000354831	5	UCEC	1	NRD1	206	ENST00000354831	5	469	0.7914	1.2352	0.8339	0.8438	0.5777
TP53:273:01:ENST00000269305	16	STAD	1	TP53	273	ENST00000269305	11	358	0.7922	0.8953	0.808	0.6452	0.323
PTEN:70:01:ENST00000371953	6	UCEC	1	PTEN	70	ENST00000371953	6	468	0.7929	1.1726	0.8744	0.7061	0.4348
SLC12A1:877:01:ENST00000380993	4	UCEC	1	SLC12A1	877	ENST00000380993	4	470	0.7933	0	0.9955	0.2211	0.1385
MET:1250:01:ENST00000397752	4	KIRP	1	MET	1250	ENST00000397752	4	274	0.7937	1.28	0.808	0.7847	0.4605
PTEN:233:01:ENST00000371953	5	GBM	1	PTEN	233	ENST00000371953	5	355	0.7952	0.9304	0.8862	0.9817	0.8428
ELK3:176:01:ENST00000228741	6	UCEC	1	ELK3	176	ENST00000228741	4	470	0.7959	0	0.9956	0.2078	0.1311
ENO4:342:01:ENST00000341276	4	UCEC	1	ENO4	342	ENST00000341276	4	470	0.7972	0	0.9956	0.6599	0.4005
PAX3:424:01:ENST00000350526	5	COAD	1	PAX3	424	ENST00000350526	5	337	0.799	0.7693	0.7946	0.916	0.6674
EIF3J:61:01:ENST00000261868	7	COAD	1	EIF3J	61	ENST00000261868	4	338	0.7999	1.2863	0.8028	0.9278	0.7114
BRAF:600:01:ENST00000288602	10	LUAD	1	BRAF	600	ENST00000288602	9	470	0.8002	1.1318	0.8069	0.9409	0.7204
PLEKHA6:328:01:ENST00000272203	15	COAD	1	PLEKHA6	328	ENST00000272203	8	334	0.8005	0.6908	0.7138	0.6071	0.3464
TP53:179:01:ENST00000269305	4	UCEC	1	TP53	179	ENST00000269305	4	470	0.8005	1.3036	0.7922	0.986	0.865
TP53:176:01:ENST00000269305	6	BRCA	1	TP53	176	ENST00000269305	6	937	0.8007	1.2697	0.8122	0.975	0.8201
APC:554:01:ENST00000257430	4	COAD	1	APC	554	ENST00000257430	4	338	0.8007	0.7413	0.7667	0.632	0.304
IL17RB:172:01:ENST00000288167	4	UCEC	1	IL17RB	172	ENST00000288167	4	470	0.8009	0	0.9956	0.4774	0.2728
EPPK1:2015:01:ENST00000615648	5	UCEC	1	EPPK1	2015	ENST00000615648	4	470	0.8013	0	0.9956	0.3881	0.2239
CENPE:2490:01:ENST00000265148	4	UCEC	1	CENPE	2490	ENST00000265148	4	470	0.8015	0	0.9956	0.2162	0.1358
HRAS:13:01:ENST00000311189	5	LUSC	1	HRAS	13	ENST00000311189	5	459	0.8022	1.2485	0.7552	0.7075	0.4435
TTK:192:01:ENST00000369798	6	STAD	1	TTK	192	ENST00000369798	4	365	0.8025	1.201	0.7971	0.9947	0.9197
TEAD2:295:01:ENST00000311227	9	UCEC	1	TEAD2	295	ENST00000311227	7	467	0.8025	1.1583	0.8839	0.4104	0.2258
RRAS2:72:01:ENST00000256196	6	UCEC	1	RRAS2	72	ENST00000256196	6	468	0.8026	1.1584	0.8839	0.8613	0.5974
CUL1:483:01:ENST00000325222	4	BLCA	1	CUL1	483	ENST00000325222	4	382	0.8035	1.22	0.7798	0.9775	0.8357
MECOM:205:01:ENST00000468789	4	UCEC	1	MECOM	205	ENST00000468789	4	470	0.8038	0	0.9956	0.2905	0.1729
WDR5:217:01:ENST00000358625	16	UCEC	1	WDR5	217	ENST00000358625	13	461	0.8043	1.1708	0.8271	0.3979	0.2053
KMT2D:2354:01:ENST00000301067	10	UCEC	1	KMT2D	2354	ENST00000301067	10	464	0.8048	0.6871	0.7093	0.5741	0.3208
UHRF1BP1:1333:01:ENST00000192788	4	UCEC	1	UHRF1BP1	1333	ENST00000192788	4	470	0.805	0	0.9956	0.1783	0.1172
OR5D16:6:01:ENST00000378396	4	STAD	1	OR5D16	6	ENST00000378396	4	365	0.8066	0.7393	0.7635	0.672	0.4162
ZNF534:305:06:ENST00000332323	6	SKCM	6	ZNF534	305	ENST00000332323	5	415	0.8067	1.1251	0.8166	0.3299	0.0764
PHACTR2:196:01:ENST00000427704	4	UCEC	1	PHACTR2	196	ENST00000427704	4	470	0.8077	0	0.9956	0.2136	0.1333
VHL:115:01:ENST00000256474	4	KIRC	1	VHL	115	ENST00000256474	4	326	0.8084	0	0.9965	0	0.003
TTI1:924:01:ENST00000373447	6	UCEC	1	TTI1	924	ENST00000373447	6	468	0.8096	0.7712	0.7963	0.9764	0.8235
UNC5C:44:01:ENST00000453304	7	UCEC	1	UNC5C	44	ENST00000453304	4	470	0.8096	0	0.9957	0.209	0.1319
TP53:337:01:ENST00000269305	6	LUAD	1	TP53	337	ENST00000269305	4	475	0.8098	1.3808	0.7482	0.2668	0.1709
CCAR2:417:01:ENST00000308511	5	UCEC	1	CCAR2	417	ENST00000308511	4	470	0.8116	0	0.9957	0.1827	0.1193
ROBO1:755:01:ENST00000464233	5	UCEC	1	ROBO1	755	ENST00000464233	4	470	0.8121	1.2856	0.803	1	0.9944
MYO1A:1033:01:ENST00000300119	9	UCEC	1	MYO1A	1033	ENST00000300119	7	467	0.813	0.7568	0.7819	0.9824	0.8534
ADAMTS1:931:01:ENST00000284984	5	UCEC	1	ADAMTS1	931	ENST00000284984	4	470	0.8135	0	0.9957	0.3012	0.1773
TP53:241:01:ENST00000269305	5	BLCA	1	TP53	241	ENST00000269305	5	381	0.8138	0.8923	0.845	0.5752	0.2433
NFE2L2:79:01:ENST00000397062	4	ESCA	1	NFE2L2	79	ENST00000397062	4	173	0.814	1.4495	0.714	0.0934	0.0817
KCND2:5:01:ENST00000331113	5	UCEC	1	KCND2	5	ENST00000331113	5	469	0.814	1.1941	0.8602	0.9151	0.685
TP53:248:01:ENST00000269305	13	HNSC	1	TP53	248	ENST00000269305	13	462	0.8173	1.1045	0.8108	0.9696	0.8074
TP53:273:01:ENST00000269305	20	BRCA	1	TP53	273	ENST00000269305	20	923	0.8181	1.0907	0.8644	0.537	0.2444
SMARCAD1:347:01:ENST00000354268	6	UCEC	1	SMARCAD1	347	ENST00000354268	5	469	0.8202	1.1972	0.8581	0.9929	0.9057
KMT2B:553:01:ENST00000420124	6	UCEC	1	KMT2B	553	ENST00000420124	5	469	0.8203	0	0.9945	0.0007	0.0058
CNTLN:1308:01:ENST00000380647	8	UCEC	1	CNTLN	1308	ENST00000380647	7	467	0.8206	1.1238	0.9078	0.2764	0.1529
JAK1:430:01:ENST00000342505	5	UCEC	1	JAK1	430	ENST00000342505	5	469	0.8206	0.7673	0.7931	0.5457	0.2331
CCND1:287:01:ENST00000227507	6	UCEC	1	CCND1	287	ENST00000227507	5	469	0.8219	1.1953	0.8595	0.9039	0.666
ARMC4:705:06:ENST00000305242	5	SKCM	6	ARMC4	705	ENST00000305242	4	416	0.8232	0.9212	0.888	0.3842	0.1022
FAS:135:01:ENST00000355740	4	UCEC	1	FAS	135	ENST00000355740	4	470	0.8233	0	0.9957	0.1539	0.1037
ATXN2L:1002:01:ENST00000336783	10	UCEC	1	ATXN2L	1002	ENST00000336783	8	466	0.8251	0.7349	0.7596	0.8932	0.6451
TVP23A:140:01:ENST00000299866	7	UCEC	1	TVP23A	140	ENST00000299866	7	467	0.8252	0.7621	0.7873	0.8792	0.5997
PIK3R1:564:01:ENST00000521381	6	UCEC	1	PIK3R1	564	ENST00000521381	6	468	0.8274	1.0546	0.9412	0.0679	0.0076
APC:216:01:ENST00000257430	11	COAD	1	APC	216	ENST00000257430	10	332	0.8296	0.8337	0.7999	0.9863	0.8663
EP300:1399:01:ENST00000263253	4	CESC	1	EP300	1399	ENST00000263253	4	244	0.8298	0.7801	0.806	0.2926	0.0747
PRKG2:143:06:ENST00000264399	5	SKCM	6	PRKG2	143	ENST00000264399	4	416	0.8303	0.8898	0.8697	0.9491	0.7374
BMPR2:583:01:ENST00000374580	14	COAD	1	BMPR2	583	ENST00000374580	9	333	0.8309	1.136	0.8591	0.8497	0.5828
FBXW7:505:01:ENST00000281708	7	HNSC	1	FBXW7	505	ENST00000281708	7	468	0.8312	1.1462	0.8146	0.9058	0.6688
TP53:225:01:ENST00000269305	5	BRCA	1	TP53	225	ENST00000269305	5	938	0.8313	1.1403	0.8961	0.935	0.7061
TRIM51:144:01:ENST00000449290	12	UCEC	1	TRIM51	144	ENST00000449290	8	466	0.8316	0.735	0.7597	0.9864	0.8682
SCAF11:853:01:ENST00000369367	5	UCEC	1	SCAF11	853	ENST00000369367	5	469	0.8317	1.183	0.8674	0.9989	0.9627
OR6T1:179:06:ENST00000321252	4	SKCM	6	OR6T1	179	ENST00000321252	4	416	0.8319	1.2143	0.7851	0.9446	0.7459
ST8SIA6:252:01:ENST00000377602	6	UCEC	1	ST8SIA6	252	ENST00000377602	5	469	0.8326	0.7839	0.8096	0.4299	0.1545
TP53:331:01:ENST00000269305	4	HNSC	1	TP53	331	ENST00000269305	4	471	0.8341	0.8624	0.8355	0.732	0.3925
PIK3R1:376:01:ENST00000521381	4	UCEC	1	PIK3R1	376	ENST00000521381	4	470	0.8375	1.2459	0.8271	0.7201	0.3848
OCIAD1:233:01:ENST00000264312	7	STAD	1	OCIAD1	233	ENST00000264312	4	365	0.8394	0.7732	0.7978	0.282	0.1779
PIK3CA:545:01:ENST00000263967	17	LUSC	1	PIK3CA	545	ENST00000263967	15	449	0.8407	1.0757	0.841	0.5603	0.2536
PIK3R1:582:01:ENST00000521381	13	UCEC	1	PIK3R1	582	ENST00000521381	12	462	0.8426	0.7286	0.7532	0.0385	0.026
TP53:248:01:ENST00000269305	16	UCEC	1	TP53	248	ENST00000269305	15	459	0.8439	0.8257	0.7898	0.8465	0.5739
DENND2A:242:01:ENST00000275884	4	COAD	1	DENND2A	242	ENST00000275884	4	338	0.8441	1.2197	0.8439	0.9963	0.9266
ARG1:98:01:ENST00000368087	5	UCEC	1	ARG1	98	ENST00000368087	4	470	0.8443	0	0.9959	0.1254	0.091
GRIN3A:364:06:ENST00000361820	4	SKCM	6	GRIN3A	364	ENST00000361820	4	416	0.8445	0.9312	0.9035	0.4295	0.1276
CHRM3:567:01:ENST00000255380	5	UCEC	1	CHRM3	567	ENST00000255380	4	470	0.8451	1.2342	0.8345	0.9648	0.7842
SPOP:117:01:ENST00000347630	9	UCEC	1	SPOP	117	ENST00000347630	9	465	0.8466	0.7308	0.7554	0.5946	0.3378
NAA15:614:01:ENST00000296543	4	UCEC	1	NAA15	614	ENST00000296543	4	470	0.8469	0.7149	0.7406	0.1828	0.0349
XYLT2:529:01:ENST00000017003	32	STAD	1	XYLT2	529	ENST00000017003	8	361	0.849	0.8909	0.8431	0.7592	0.4823
TMEM185B:341:01:ENST00000426077	13	UCEC	1	TMEM185B	341	ENST00000426077	9	465	0.8513	0.7307	0.7553	0.7173	0.4355
CDKN2A:80:01:ENST00000304494	20	HNSC	1	CDKN2A	80	ENST00000304494	19	456	0.8529	1.0609	0.8563	0.6035	0.2921
UGT2A1:457:06:ENST00000503640	6	SKCM	6	UGT2A1	457	ENST00000503640	4	416	0.853	0.9085	0.8927	0.9622	0.7745
KRAS:61:01:ENST00000256078	7	COAD	1	KRAS	61	ENST00000256078	5	337	0.8532	0.8181	0.8421	0.9687	0.7951
DOCK3:1852:01:ENST00000266037	28	STAD	1	DOCK3	1852	ENST00000266037	7	362	0.8534	0.8978	0.8534	0.9957	0.9249
KRAS:146:01:ENST00000256078	13	COAD	1	KRAS	146	ENST00000256078	10	332	0.8548	0.8528	0.8242	0.9937	0.913
SMAD7:209:01:ENST00000262158	19	UCEC	1	SMAD7	209	ENST00000262158	15	459	0.8556	0.8339	0.8005	0.8036	0.5211
SMAD4:361:01:ENST00000342988	8	STAD	1	SMAD4	361	ENST00000342988	7	362	0.8557	1.1128	0.8548	0.9471	0.7344
TP53:195:01:ENST00000269305	5	BRCA	1	TP53	195	ENST00000269305	4	939	0.858	0	0.9948	0.4245	0.2452
DNAH5:3236:06:ENST00000265104	8	SKCM	6	DNAH5	3236	ENST00000265104	6	414	0.8581	1.1005	0.8499	0.6373	0.297
DMBT1:175:06:ENST00000338354	4	SKCM	6	DMBT1	175	ENST00000338354	4	416	0.8593	1.1805	0.8159	0.9712	0.8144
C19orf70:51:01:ENST00000309324	5	UCEC	1	C19orf70	51	ENST00000309324	4	470	0.8597	0	0.996	0.0856	0.0711
MXRA5:2006:06:ENST00000217939	5	SKCM	6	MXRA5	2006	ENST00000217939	4	416	0.86	1.1799	0.8165	0.9692	0.8083
ARID1A:1407:01:ENST00000324856	4	UCEC	1	ARID1A	1407	ENST00000324856	4	470	0.8614	0	0.996	0.107	0.0824
NLK:192:01:ENST00000407008	6	UCEC	1	NLK	192	ENST00000407008	5	469	0.8614	0.825	0.8486	0.6396	0.3103
TP53:152:01:ENST00000269305	4	LUAD	1	TP53	152	ENST00000269305	4	475	0.8616	1.2544	0.8215	0.3106	0.1924
TP53:245:01:ENST00000269305	4	PAAD	1	TP53	245	ENST00000269305	4	172	0.8623	1.1177	0.8498	0.845	0.5284
ARL16:6:06:ENST00000397498	4	SKCM	6	ARL16	6	ENST00000397498	4	416	0.8624	0.9151	0.9008	0.9936	0.9084
CLVS1:171:01:ENST00000325897	4	SKCM	1	CLVS1	171	ENST00000325897	4	416	0.8625	1.4229	0.7258	0.046	0.0576
TP53:135:01:ENST00000269305	7	ESCA	1	TP53	135	ENST00000269305	7	170	0.8627	0.9118	0.876	0.9101	0.6519
SAMD9L:1516:01:ENST00000318238	9	STAD	1	SAMD9L	1516	ENST00000318238	4	365	0.8631	0.8874	0.8668	0.9192	0.6704
C20orf85:90:01:ENST00000371168	4	UCEC	1	C20orf85	90	ENST00000371168	4	470	0.8633	0	0.996	0.0409	0.0453
CDC7:31:01:ENST00000234626	6	UCEC	1	CDC7	31	ENST00000234626	6	468	0.8645	1.0794	0.9395	0.9545	0.7663
PHF3:1137:01:ENST00000262043	5	UCEC	1	PHF3	1137	ENST00000262043	5	469	0.8651	0.8252	0.8486	0.7837	0.4619
TP53:237:01:ENST00000269305	4	LGG	1	TP53	237	ENST00000269305	4	495	0.8654	0.89	0.871	0.2626	0.0584
ERBB2:772:01:ENST00000269571	5	LUAD	1	ERBB2	772	ENST00000269571	5	474	0.8675	0.8146	0.8382	0.4451	0.2568
PROS1:316:06:ENST00000394236	6	SKCM	6	PROS1	316	ENST00000394236	5	415	0.8677	1.0872	0.8687	0.3262	0.0744
BRAF:600:01:ENST00000288602	4	GBM	1	BRAF	600	ENST00000288602	4	356	0.8682	0.9837	0.974	0.5312	0.1138
CTNNB1:37:01:ENST00000349496	5	LUAD	1	CTNNB1	37	ENST00000349496	4	475	0.8698	1.2324	0.8352	0.3977	0.2395
C6:277:01:ENST00000263413	5	UCEC	1	C6	277	ENST00000263413	5	469	0.871	1.135	0.9	0.9232	0.699
GNAS:201:01:ENST00000371085	8	PAAD	1	GNAS	201	ENST00000371085	8	168	0.8712	1.0879	0.8548	0.9832	0.8509
TP53:175:01:ENST00000269305	5	PAAD	1	TP53	175	ENST00000269305	5	171	0.8733	0.9007	0.8837	0.6468	0.3955
MSH3:383:01:ENST00000265081	14	UCEC	1	MSH3	383	ENST00000265081	13	461	0.8735	1.0787	0.9158	0.7625	0.4785
PRR11:23:01:ENST00000262293	5	UCEC	1	PRR11	23	ENST00000262293	5	469	0.8747	0.842	0.8644	0.7191	0.3885
OR4D5:217:06:ENST00000307033	6	SKCM	6	OR4D5	217	ENST00000307033	5	415	0.8761	0.9532	0.925	0.2432	0.0427
SLC3A2:300:01:ENST00000377890	26	STAD	1	SLC3A2	300	ENST00000377890	14	355	0.8763	0.9467	0.8876	0.393	0.1427
STAMBPL1:405:01:ENST00000371924	5	UCEC	1	STAMBPL1	405	ENST00000371924	4	470	0.8772	1.1838	0.8669	0.9825	0.8496
TP53:110:01:ENST00000269305	5	HNSC	1	TP53	110	ENST00000269305	5	470	0.8777	0.9015	0.8843	0.9588	0.7653
TP53:337:01:ENST00000269305	5	HNSC	1	TP53	337	ENST00000269305	5	470	0.8783	1.1266	0.8669	0.7899	0.5219
ERBB2:310:01:ENST00000269571	22	BLCA	1	ERBB2	310	ENST00000269571	20	366	0.879	1.0566	0.8723	0.9578	0.7722
PTEN:173:01:ENST00000371953	5	GBM	1	PTEN	173	ENST00000371953	4	356	0.8794	0.9916	0.9867	0.597	0.1527
WDR47:81:01:ENST00000369962	5	UCEC	1	WDR47	81	ENST00000369962	4	470	0.8799	1.1794	0.8698	0.7477	0.415
PTEN:130:01:ENST00000371953	5	BRCA	1	PTEN	130	ENST00000371953	5	938	0.8804	1.0232	0.9818	0.8302	0.5221
HHIPL2:294:06:ENST00000343410	5	SKCM	6	HHIPL2	294	ENST00000343410	5	415	0.8807	1.0645	0.8916	0.0848	0.0018
B3GALTL:80:01:ENST00000343307	6	UCEC	1	B3GALTL	80	ENST00000343307	4	470	0.8812	0	0.9962	0.0456	0.0487
TP53:213:01:ENST00000269305	4	PAAD	1	TP53	213	ENST00000269305	4	172	0.8815	1.1597	0.8362	0.5769	0.3575
PSME4:1805:01:ENST00000404125	6	UCEC	1	PSME4	1805	ENST00000404125	6	468	0.8843	1.0566	0.9564	0.832	0.5627
NGRN:27:01:ENST00000379095	4	UCEC	1	NGRN	27	ENST00000379095	4	470	0.8846	1.1625	0.8811	0.991	0.8943
HRAS:13:01:ENST00000311189	4	THYM	1	HRAS	13	ENST00000311189	4	117	0.8848	0	0.9989	0.8075	0.5364
RNF6:593:01:ENST00000346166	8	UCEC	1	RNF6	593	ENST00000346166	6	468	0.885	1.056	0.9568	0.9622	0.7866
TP53:307:01:ENST00000269305	4	HNSC	1	TP53	307	ENST00000269305	4	471	0.8867	0.9008	0.8835	0.6996	0.3568
PXDNL:925:06:ENST00000356297	6	SKCM	6	PXDNL	925	ENST00000356297	4	416	0.8868	0.8768	0.8959	0.2244	0.1501
KIT:816:03:ENST00000288135	5	LAML	3	KIT	816	ENST00000288135	5	113	0.8869	1.1415	0.8236	0.4748	0.2876
PIK3CA:545:01:ENST00000263967	6	ESCA	1	PIK3CA	545	ENST00000263967	5	172	0.8871	1.1279	0.8674	0.8925	0.648
PDS5B:724:01:ENST00000315596	4	UCEC	1	PDS5B	724	ENST00000315596	4	470	0.8874	0.749	0.7756	0.1764	0.0331
CD79A:131:01:ENST00000221972	5	UCEC	1	CD79A	131	ENST00000221972	4	470	0.8875	1.1671	0.878	0.8878	0.6097
OR2T12:210:06:ENST00000317996	6	SKCM	6	OR2T12	210	ENST00000317996	5	415	0.8877	0.9472	0.9265	0.7613	0.4259
WDR72:778:01:ENST00000360509	4	UCEC	1	WDR72	778	ENST00000360509	4	470	0.8895	0	0.9963	0.0565	0.055
GATA3:330:01:ENST00000346208	6	BRCA	1	GATA3	330	ENST00000346208	6	937	0.8899	1.0932	0.9294	0.9935	0.9084
CAPN13:405:06:ENST00000295055	5	SKCM	6	CAPN13	405	ENST00000295055	4	416	0.8913	1.1428	0.8513	0.977	0.8335
OR9K2:326:01:ENST00000305377	5	UCEC	1	OR9K2	326	ENST00000305377	4	470	0.8927	1.1491	0.8902	0.9407	0.7188
MYO9A:1422:01:ENST00000356056	4	UCEC	1	MYO9A	1422	ENST00000356056	4	470	0.8928	0.7549	0.7815	0.3449	0.1022
DYRK1A:151:01:ENST00000398960	8	UCEC	1	DYRK1A	151	ENST00000398960	5	469	0.8947	1.1074	0.9193	0.9988	0.9601
TP53:248:01:ENST00000269305	9	STAD	1	TP53	248	ENST00000269305	7	362	0.8964	0.8909	0.8711	0.4424	0.2481
KDM6A:1293:01:ENST00000377967	4	BLCA	1	KDM6A	1293	ENST00000377967	4	382	0.8965	0.8526	0.8738	0.1195	0.0985
TP53:179:01:ENST00000269305	8	BRCA	1	TP53	179	ENST00000269305	8	935	0.8967	0	0.9954	0.0001	0.0012
FXR1:124:01:ENST00000357559	5	UCEC	1	FXR1	124	ENST00000357559	5	469	0.8969	1.1051	0.9211	0.7616	0.4354
DHX16:1033:01:ENST00000376442	9	STAD	1	DHX16	1033	ENST00000376442	4	365	0.897	1.0962	0.8976	0.7105	0.3685
NOTCH1:357:01:ENST00000277541	8	LGG	1	NOTCH1	357	ENST00000277541	8	491	0.8974	0.8367	0.8592	0.3553	0.1912
OSBPL6:109:01:ENST00000190611	4	UCEC	1	OSBPL6	109	ENST00000190611	4	470	0.8977	0	0.9944	0.0231	0.0338
PHF2:492:01:ENST00000359246	10	UCEC	1	PHF2	492	ENST00000359246	10	464	0.899	1.1138	0.9148	0.0096	0.0114
TP53:110:01:ENST00000269305	5	BRCA	1	TP53	110	ENST00000269305	5	938	0.8992	0.978	0.9824	0.7094	0.3784
TP53:273:01:ENST00000269305	9	ESCA	1	TP53	273	ENST00000269305	9	168	0.9003	0.9429	0.9092	0.8516	0.5549
TP53:238:01:ENST00000269305	4	BRCA	1	TP53	238	ENST00000269305	4	939	0.9014	0	0.9944	0.0372	0.0438
TP53:266:01:ENST00000269305	6	LUSC	1	TP53	266	ENST00000269305	5	459	0.9021	1.1151	0.8782	0.8754	0.6234
POLR2A:529:01:ENST00000617998	5	UCEC	1	POLR2A	529	ENST00000617998	5	469	0.9023	0.8744	0.8949	0.7461	0.4178
PIK3CA:542:01:ENST00000263967	18	HNSC	1	PIK3CA	542	ENST00000263967	17	458	0.9025	0.9549	0.9046	1	0.9999
TMEM60:78:01:ENST00000257663	6	UCEC	1	TMEM60	78	ENST00000257663	6	468	0.9035	1.0304	0.9763	0.6795	0.4117
PIK3CA:545:01:ENST00000263967	24	HNSC	1	PIK3CA	545	ENST00000263967	22	453	0.9044	1.0328	0.9109	0.0248	0.0022
BRINP3:497:06:ENST00000367462	5	SKCM	6	BRINP3	497	ENST00000367462	4	416	0.9046	0.9463	0.9382	0.979	0.8329
TICAM1:642:01:ENST00000248244	9	STAD	1	TICAM1	642	ENST00000248244	4	365	0.9047	1.088	0.9058	0.9973	0.9404
TCF7L2:488:01:ENST00000355995	7	COAD	1	TCF7L2	488	ENST00000355995	5	337	0.9057	0.8646	0.8853	0.9998	0.9813
NFASC:165:01:ENST00000339876	12	STAD	1	NFASC	165	ENST00000339876	4	365	0.9057	1.087	0.9069	0.9965	0.9345
TBX4:371:01:ENST00000240335	7	UCEC	1	TBX4	371	ENST00000240335	5	469	0.9068	0.8826	0.9012	0.8609	0.5675
TP53:214:01:ENST00000269305	4	LUSC	1	TP53	214	ENST00000269305	4	460	0.9071	1.2063	0.8519	0.1247	0.1009
TP53:175:01:ENST00000269305	5	SARC	1	TP53	175	ENST00000269305	5	220	0.9078	1.0779	0.9166	0.98	0.8375
IGSF9B:147:01:ENST00000321016	7	UCEC	1	IGSF9B	147	ENST00000321016	4	470	0.908	0	0.9946	0.0146	0.0266
PIK3CA:345:01:ENST00000263967	8	UCEC	1	PIK3CA	345	ENST00000263967	8	466	0.9083	0.7959	0.8206	0.6694	0.3985
VHL:130:01:ENST00000256474	4	KIRC	1	VHL	130	ENST00000256474	4	326	0.9085	1.0768	0.9415	0.9821	0.8524
CR2:209:01:ENST00000367058	5	UCEC	1	CR2	209	ENST00000367058	4	470	0.9102	1.1214	0.9101	0.7096	0.3739
TP53:298:01:ENST00000269305	5	LUSC	1	TP53	298	ENST00000269305	4	460	0.9119	0.9364	0.9268	0.7245	0.3842
PIK3CA:1044:01:ENST00000263967	8	UCEC	1	PIK3CA	1044	ENST00000263967	6	468	0.9121	1.0266	0.9792	0.9395	0.7316
TP53:157:01:ENST00000269305	4	BRCA	1	TP53	157	ENST00000269305	4	939	0.9132	0	0.9951	0.4418	0.2549
MBD6:671:01:ENST00000355673	5	UCEC	1	MBD6	671	ENST00000355673	5	469	0.9135	0.8905	0.9083	0.9206	0.6739
NFE2L2:30:01:ENST00000397062	4	LUSC	1	NFE2L2	30	ENST00000397062	4	460	0.9142	0.8849	0.903	0.2981	0.1847
TP53:220:01:ENST00000269305	8	OV	1	TP53	220	ENST00000269305	8	402	0.9147	0.9794	0.9632	0.9608	0.7715
CDKN2A:153:01:ENST00000304494	10	HNSC	1	CDKN2A	153	ENST00000304494	8	467	0.9151	1.0539	0.9172	0.9336	0.7021
SWI5:34:06:ENST00000320188	5	SKCM	6	SWI5	34	ENST00000320188	4	416	0.9156	1.116	0.8774	0.9946	0.9184
YLPM1:147:01:ENST00000325680	4	UCEC	1	YLPM1	147	ENST00000325680	4	470	0.9181	0	0.9948	0.0098	0.0217
RPL22:15:01:ENST00000234875	9	COAD	1	RPL22	15	ENST00000234875	4	338	0.9188	1.1056	0.9208	0.9969	0.9485
IGHV1OR21-1:82:01:ENST00000622028	4	STAD	1	IGHV1OR21-1	82	ENST00000622028	4	365	0.9191	1.0738	0.9204	0.8564	0.5558
TP53:135:01:ENST00000269305	4	LUSC	1	TP53	135	ENST00000269305	4	460	0.9192	1.1762	0.8715	0.168	0.1228
PIK3CA:545:01:ENST00000263967	6	LUAD	1	PIK3CA	545	ENST00000263967	5	474	0.9204	1.0648	0.9297	0.9935	0.9086
ERBB3:104:01:ENST00000267101	4	UCEC	1	ERBB3	104	ENST00000267101	4	470	0.9204	1.1142	0.9151	0.7325	0.3983
KMT2D:2354:01:ENST00000301067	7	COAD	1	KMT2D	2354	ENST00000301067	4	338	0.9206	1.1081	0.9189	0.9991	0.964
PIK3CA:118:01:ENST00000263967	4	LGG	1	PIK3CA	118	ENST00000263967	4	495	0.9215	0.8632	0.8838	0.9792	0.8426
CDH1:63:01:ENST00000261769	4	BRCA	1	CDH1	63	ENST00000261769	4	939	0.9216	0.8113	0.8355	0.5174	0.2089
RXRA:427:01:ENST00000481739	14	BLCA	1	RXRA	427	ENST00000481739	13	373	0.9218	0.9556	0.9203	0.7829	0.5017
TP53:282:01:ENST00000269305	6	LUSC	1	TP53	282	ENST00000269305	6	458	0.9227	1.0652	0.9136	0.9651	0.7843
USP13:118:01:ENST00000263966	4	UCEC	1	USP13	118	ENST00000263966	4	470	0.923	0	0.9949	0.0053	0.017
MKI67:233:01:ENST00000368654	4	UCEC	1	MKI67	233	ENST00000368654	4	470	0.9258	1.1038	0.9218	0.7494	0.4186
SPTA1:1732:01:ENST00000368147	6	STAD	1	SPTA1	1732	ENST00000368147	5	364	0.9259	1.0653	0.9292	0.8882	0.6436
TP53:342:01:ENST00000269305	4	OV	1	TP53	342	ENST00000269305	4	406	0.926	1.0756	0.8856	0.261	0.0213
CD1E:85:01:ENST00000368167	5	STAD	1	CD1E	85	ENST00000368167	4	365	0.9264	1.0658	0.9287	0.9997	0.9822
TP53:163:01:ENST00000269305	4	LUAD	1	TP53	163	ENST00000269305	4	475	0.9267	0.9086	0.9239	0.7135	0.4493
ASXL3:876:01:ENST00000269197	4	UCEC	1	ASXL3	876	ENST00000269197	4	470	0.9273	1.1013	0.9237	0.7588	0.4309
CDX2:306:01:ENST00000381020	6	UCEC	1	CDX2	306	ENST00000381020	6	468	0.9276	1.0112	0.9913	0.9914	0.8959
KRAS:12:01:ENST00000256078	136	LUAD	1	KRAS	12	ENST00000256078	118	361	0.9287	1.0189	0.9183	0.3687	0.164
BMPR2:583:01:ENST00000374580	12	STAD	1	BMPR2	583	ENST00000374580	5	364	0.9292	1.0608	0.9339	0.8881	0.6436
MYO10:1223:01:ENST00000513610	6	UCEC	1	MYO10	1223	ENST00000513610	6	468	0.9297	1.0091	0.9928	0.951	0.7577
ADAM30:622:01:ENST00000369400	5	UCEC	1	ADAM30	622	ENST00000369400	4	470	0.93	0	0.9951	0.0025	0.0124
PTEN:342:01:ENST00000371953	5	UCEC	1	PTEN	342	ENST00000371953	4	470	0.9305	1.0959	0.9275	0.9103	0.6522
OR6K2:304:01:ENST00000359610	5	COAD	1	OR6K2	304	ENST00000359610	4	338	0.9306	1.0942	0.9289	0.9402	0.7147
PTEN:132:01:ENST00000371953	4	GBM	1	PTEN	132	ENST00000371953	4	356	0.9318	1.018	0.9718	0.609	0.1607
TMCC1:247:01:ENST00000393238	4	UCEC	1	TMCC1	247	ENST00000393238	4	470	0.9322	0	0.9951	0.0033	0.0137
TP53:282:01:ENST00000269305	9	HNSC	1	TP53	282	ENST00000269305	8	467	0.9325	0.9619	0.9387	0.8074	0.4913
CCDC7:242:01:ENST00000375025	6	UCEC	1	CCDC7	242	ENST00000375025	6	468	0.9343	1.0044	0.9965	0.9301	0.7124
IFIH1:589:01:ENST00000263642	5	UCEC	1	IFIH1	589	ENST00000263642	4	470	0.9348	0	0.9952	0.001	0.0089
ABCA12:1671:01:ENST00000272895	9	STAD	1	ABCA12	1671	ENST00000272895	4	365	0.9358	0.9429	0.9343	0.8904	0.6142
LMTK3:1199:01:ENST00000600059	5	UCEC	1	LMTK3	1199	ENST00000600059	4	470	0.9358	0	0.9952	0.0025	0.0125
TP53:187:01:ENST00000269305	5	BRCA	1	TP53	187	ENST00000269305	5	938	0.9361	0.9052	0.9211	0.571	0.253
QKI:134:01:ENST00000361752	7	UCEC	1	QKI	134	ENST00000361752	7	467	0.9372	0.8482	0.8701	0.9239	0.6994
TGM6:360:01:ENST00000202625	4	UCEC	1	TGM6	360	ENST00000202625	4	470	0.9373	0	0.9953	0.004	0.0151
PCDH19:364:01:ENST00000373034	8	UCEC	1	PCDH19	364	ENST00000373034	5	469	0.9376	1.0583	0.9551	0.9977	0.9452
ZNF207:107:01:ENST00000321233	4	UCEC	1	ZNF207	107	ENST00000321233	4	470	0.9376	0	0.9953	0.0053	0.0167
PIEZO2:1533:01:ENST00000503781	4	UCEC	1	PIEZO2	1533	ENST00000503781	4	470	0.9388	0	0.9953	0.0008	0.0081
NRAS:61:06:ENST00000369535	94	SKCM	6	NRAS	61	ENST00000369535	86	334	0.939	1.0149	0.9293	0.2788	0.101
TP53:196:01:ENST00000269305	5	LGG	1	TP53	196	ENST00000269305	5	494	0.9393	1.0447	0.9512	0.5227	0.2111
WBSCR17:289:06:ENST00000333538	4	SKCM	6	WBSCR17	289	ENST00000333538	4	416	0.9401	0.9772	0.9742	0.9986	0.9574
NRAS:12:01:ENST00000369535	5	READ	1	NRAS	12	ENST00000369535	5	113	0.9403	1.0335	0.9746	0.8522	0.5574
NIPBL:2776:01:ENST00000282516	11	UCEC	1	NIPBL	2776	ENST00000282516	10	464	0.9405	1.0112	0.9877	0.8913	0.6251
PIK3CA:420:01:ENST00000263967	5	BRCA	1	PIK3CA	420	ENST00000263967	5	938	0.9417	0	0.9948	0.0007	0.0059
CDKN2A:101:01:ENST00000304494	5	LUAD	1	CDKN2A	101	ENST00000304494	5	474	0.9438	1.0437	0.9521	0.9861	0.8644
PIK3CA:542:01:ENST00000263967	4	PRAD	1	PIK3CA	542	ENST00000263967	4	486	0.9456	0	0.9985	0.9282	0.7095
KIT:816:01:ENST00000288135	11	TGCT	1	KIT	816	ENST00000288135	11	117	0.9459	0	0.9991	0.5152	0.2747
CCDC141:1204:06:ENST00000420890	5	SKCM	6	CCDC141	1204	ENST00000420890	4	416	0.9482	0.9841	0.982	0.9867	0.8675
ERBB3:104:01:ENST00000267101	4	BLCA	1	ERBB3	104	ENST00000267101	4	382	0.949	1.1144	0.9141	0.0464	0.0574
TP53:193:01:ENST00000269305	4	LGG	1	TP53	193	ENST00000269305	4	495	0.9492	1.0636	0.9511	0.9978	0.946
TP53:285:01:ENST00000269305	10	BLCA	1	TP53	285	ENST00000269305	10	376	0.9498	1.0394	0.9391	0.6886	0.4163
PCBP1:102:01:ENST00000303577	5	COAD	1	PCBP1	102	ENST00000303577	4	338	0.9499	1.0671	0.9487	0.9959	0.9278
SOS1:233:01:ENST00000402219	7	UCEC	1	SOS1	233	ENST00000402219	6	468	0.9516	0.8998	0.9165	0.9948	0.9177
ZNF506:116:01:ENST00000443905	6	UCEC	1	ZNF506	116	ENST00000443905	5	469	0.9529	1.0414	0.9679	0.9891	0.8804
CTNNB1:37:01:ENST00000349496	6	LIHC	1	CTNNB1	37	ENST00000349496	5	344	0.9546	1.046	0.9644	0.0835	0.0698
PIK3CA:1047:01:ENST00000263967	17	STAD	1	PIK3CA	1047	ENST00000263967	7	362	0.9547	0.9631	0.9486	0.9667	0.8003
OR4C16:135:01:ENST00000314634	5	STAD	1	OR4C16	135	ENST00000314634	5	364	0.9549	1.0354	0.9611	0.7995	0.5323
PTEN:92:01:ENST00000371953	8	UCEC	1	PTEN	92	ENST00000371953	7	467	0.9553	0.8574	0.8786	0.7427	0.4645
TP53:193:01:ENST00000269305	4	UCEC	1	TP53	193	ENST00000269305	4	470	0.9574	0.8607	0.8816	0.6748	0.3385
DHX16:1033:01:ENST00000376442	8	UCEC	1	DHX16	1033	ENST00000376442	5	469	0.9577	1.0357	0.9722	0.9774	0.8284
NOVA1:34:01:ENST00000539517	5	UCEC	1	NOVA1	34	ENST00000539517	4	470	0.9589	0	0.996	0	0.002
SLC12A7:686:01:ENST00000264930	6	COAD	1	SLC12A7	686	ENST00000264930	4	338	0.959	0.9505	0.9599	0.8313	0.5196
MET:1010:01:ENST00000397752	5	LUAD	1	MET	1010	ENST00000397752	4	475	0.9591	1.0779	0.9404	0.4105	0.2464
TP53:159:01:ENST00000269305	4	LUSC	1	TP53	159	ENST00000269305	4	460	0.96	0.9479	0.9575	0.2044	0.1404
CCDC160:17:01:ENST00000370809	5	COAD	1	CCDC160	17	ENST00000370809	4	338	0.9602	1.0532	0.959	0.9408	0.7161
CELSR3:356:01:ENST00000164024	5	BLCA	1	CELSR3	356	ENST00000164024	4	382	0.9606	0.9418	0.9523	0.1486	0.1132
KIAA0040:93:01:ENST00000619513	6	UCEC	1	KIAA0040	93	ENST00000619513	6	468	0.9611	0.906	0.9226	0.9966	0.9337
MDN1:1989:01:ENST00000369393	7	UCEC	1	MDN1	1989	ENST00000369393	5	469	0.9611	0.9451	0.9553	0.9299	0.6939
RNF128:11:01:ENST00000324342	6	UCEC	1	RNF128	11	ENST00000324342	5	469	0.9617	0.9451	0.9555	0.8197	0.5084
TP53:275:01:ENST00000269305	5	LGG	1	TP53	275	ENST00000269305	4	495	0.9619	1.0417	0.9676	0.9653	0.785
PPP2R3C:23:01:ENST00000261475	4	UCEC	1	PPP2R3C	23	ENST00000261475	4	470	0.9623	0	0.9961	0	0.0027
XIRP2:656:06:ENST00000628543	6	SKCM	6	XIRP2	656	ENST00000628543	5	415	0.9624	1.0463	0.9381	0.8356	0.5229
TP53:282:01:ENST00000269305	6	GBM	1	TP53	282	ENST00000269305	6	354	0.9625	1.0261	0.9546	0.9407	0.712
TP53:132:01:ENST00000269305	5	BRCA	1	TP53	132	ENST00000269305	5	938	0.9626	0.8764	0.8956	0.51	0.2063
MAP7D3:308:01:ENST00000316077	4	UCEC	1	MAP7D3	308	ENST00000316077	4	470	0.9627	0	0.9961	0	0.0007
CNGB3:78:06:ENST00000320005	4	SKCM	6	CNGB3	78	ENST00000320005	4	416	0.9631	1.0436	0.9416	0.4963	0.1689
CHD7:2988:01:ENST00000423902	5	UCEC	1	CHD7	2988	ENST00000423902	4	470	0.9642	0.8764	0.8957	0.5335	0.2186
PCLO:4133:06:ENST00000333891	5	SKCM	6	PCLO	4133	ENST00000333891	5	415	0.9653	1.0422	0.9434	0.8768	0.5878
TP53:157:01:ENST00000269305	15	LUSC	1	TP53	157	ENST00000269305	14	450	0.966	1.0238	0.9549	0.968	0.8025
CNTNAP5:396:06:ENST00000431078	6	SKCM	6	CNTNAP5	396	ENST00000431078	5	415	0.9662	1.0267	0.9542	0.08	0.0016
SMTN:239:01:ENST00000347557	7	UCEC	1	SMTN	239	ENST00000347557	6	468	0.9673	0.9132	0.9281	0.9979	0.9491
PRKDC:2704:01:ENST00000314191	4	UCEC	1	PRKDC	2704	ENST00000314191	4	470	0.9687	1.0267	0.9794	0.6643	0.3292
PPP1R10:939:01:ENST00000376511	4	UCEC	1	PPP1R10	939	ENST00000376511	4	470	0.9692	0.886	0.9052	0.5104	0.2035
SLC27A5:554:06:ENST00000263093	9	SKCM	6	SLC27A5	554	ENST00000263093	8	412	0.9699	0.9971	0.9948	0.5765	0.2525
PHF14:182:01:ENST00000403050	6	UCEC	1	PHF14	182	ENST00000403050	6	468	0.9743	0.9588	0.9667	0.9106	0.6749
LRRC41:134:01:ENST00000343304	4	COAD	1	LRRC41	134	ENST00000343304	4	338	0.975	0.9701	0.9759	0.829	0.5163
TP53:273:01:ENST00000269305	13	HNSC	1	TP53	273	ENST00000269305	12	463	0.975	1.0122	0.975	0.2806	0.0791
WDR47:81:01:ENST00000369962	10	STAD	1	WDR47	81	ENST00000369962	6	363	0.9755	0.9801	0.9725	0.9049	0.6419
DENND1C:164:01:ENST00000381480	6	UCEC	1	DENND1C	164	ENST00000381480	6	468	0.9762	0.9643	0.9712	0.9154	0.683
UBR5:2121:01:ENST00000520539	5	UCEC	1	UBR5	2121	ENST00000520539	5	469	0.9766	0.9627	0.97	0.7689	0.4433
PCDHB2:204:06:ENST00000194155	4	SKCM	6	PCDHB2	204	ENST00000194155	4	416	0.9775	1.0522	0.943	0.9989	0.962
HLA-B:209:01:ENST00000412585	6	COAD	1	HLA-B	209	ENST00000412585	5	337	0.9778	0.9341	0.9461	0.9912	0.8958
TP53:126:01:ENST00000269305	5	LIHC	1	TP53	126	ENST00000269305	5	344	0.9787	0.9994	0.9993	0.8709	0.5813
FCRL3:272:01:ENST00000368184	6	UCEC	1	FCRL3	272	ENST00000368184	5	469	0.9789	0.9653	0.972	0.8841	0.6067
PTEN:173:01:ENST00000371953	11	UCEC	1	PTEN	173	ENST00000371953	7	467	0.9798	0.9211	0.935	0.8261	0.5531
HRAS:61:01:ENST00000311189	6	BLCA	1	HRAS	61	ENST00000311189	6	380	0.9809	1.026	0.9713	0.2176	0.1355
PIK3CA:545:01:ENST00000263967	4	GBM	1	PIK3CA	545	ENST00000263967	4	356	0.983	1.1491	0.8452	0.1727	0.1429
ARID1A:766:01:ENST00000324856	5	UCEC	1	ARID1A	766	ENST00000324856	5	469	0.9855	0.9726	0.978	0.7369	0.4069
MPRIP:353:01:ENST00000341712	6	UCEC	1	MPRIP	353	ENST00000341712	4	470	0.9856	0	0.9957	0	0.0001
PIK3CA:545:01:ENST00000263967	69	BRCA	1	PIK3CA	545	ENST00000263967	60	883	0.9859	1.005	0.9906	0.0932	0.0375
EAPP:125:01:ENST00000250454	6	UCEC	1	EAPP	125	ENST00000250454	5	469	0.986	1.0041	0.9967	0.9757	0.8206
LMAN1:305:01:ENST00000251047	11	UCEC	1	LMAN1	305	ENST00000251047	10	464	0.9882	0.9003	0.9169	0.1741	0.0933
ARID1A:1276:01:ENST00000324856	6	UCEC	1	ARID1A	1276	ENST00000324856	6	468	0.9885	0.9527	0.9616	0.966	0.7956
KRAS:12:01:ENST00000256078	40	READ	1	KRAS	12	ENST00000256078	34	84	0.989	0.9824	0.9728	0.6579	0.3662
OR11H1:79:06:ENST00000252835	9	SKCM	6	OR11H1	79	ENST00000252835	4	416	0.9905	1.0397	0.9564	0.9986	0.9568
PIK3CA:1047:01:ENST00000263967	133	BRCA	1	PIK3CA	1047	ENST00000263967	129	814	0.9906	1	1	0.6328	0.3446
PIK3CA:545:01:ENST00000263967	37	CESC	1	PIK3CA	545	ENST00000263967	29	219	0.9911	0.9984	0.9969	0.8103	0.5246
CORIN:262:06:ENST00000273857	6	SKCM	6	CORIN	262	ENST00000273857	5	415	0.9912	1.0207	0.9771	0.7651	0.4966
MORC1:55:06:ENST00000232603	4	SKCM	6	MORC1	55	ENST00000232603	4	416	0.9915	1.0205	0.9772	0.9882	0.8754
FHOD3:336:01:ENST00000359247	14	STAD	1	FHOD3	336	ENST00000359247	4	365	0.9921	1.0033	0.9963	0.9227	0.6745
HDAC4:902:01:ENST00000345617	7	UCEC	1	HDAC4	902	ENST00000345617	6	468	0.9927	0.9359	0.9475	0.9277	0.69
CTNNB1:387:01:ENST00000349496	5	LIHC	1	CTNNB1	387	ENST00000349496	5	344	0.9928	0.9497	0.959	0.1277	0.0921
PTEN:127:01:ENST00000371953	6	UCEC	1	PTEN	127	ENST00000371953	5	469	0.9928	0.9967	0.9974	0.9483	0.7386
ARID5B:456:01:ENST00000279873	4	UCEC	1	ARID5B	456	ENST00000279873	4	470	0.9933	0.9375	0.9489	0.7365	0.4025
NFE2L2:34:01:ENST00000397062	6	UCEC	1	NFE2L2	34	ENST00000397062	6	468	0.9935	0.9367	0.9482	0.9986	0.9575
SLC22A6:259:01:ENST00000377871	5	UCEC	1	SLC22A6	259	ENST00000377871	5	469	0.9944	0.9948	0.9959	0.9523	0.7484
TP53:241:01:ENST00000269305	10	UCEC	1	TP53	241	ENST00000269305	9	465	0.9946	0.8822	0.901	0.2464	0.1312
PXDN:865:01:ENST00000252804	9	STAD	1	PXDN	865	ENST00000252804	4	365	0.9963	1.0005	0.9995	0.9255	0.6805
SCN7A:445:06:ENST00000409855	5	SKCM	6	SCN7A	445	ENST00000409855	5	415	0.9976	1.0272	0.9699	0.7829	0.5144
ARID4B:939:01:ENST00000264183	9	UCEC	1	ARID4B	939	ENST00000264183	8	466	0.9977	0.9344	0.9247	0.1849	0.042
MFRP:384:01:ENST00000449574	8	UCEC	1	MFRP	384	ENST00000449574	7	467	0.9978	0.9032	0.9194	0.9965	0.9331
BTBD11:1003:01:ENST00000280758	4	STAD	1	BTBD11	1003	ENST00000280758	4	365	0.9987	0.9961	0.9969	0.1151	0.0963
