# Supplementary material for: The Impact of Mutational Hotspots on Cancer Survival
Source: Cancers (Basel). 2024 Mar 6;16(5):1072. doi: 10.3390/cancers16051072 (PMC10931094; doi:10.3390/cancers16051072)
Supplement: Supplementary file 1 [file cancers-16-01072-s001.zip › supplementary Table S2 - Hotspot X vs. Gene.xlsx]

## Sheet: Hotspot X vs Gene
Hotspot ID	TCGA Mutated Samples	Cancer	Site	Gene	Position	Transcript	n With HotSpot	n Without HotSpot	p Valorate	Hazard Ratio	p Hazard Ratio	p Log Rank	p Cox PH
TTN:20780:06:ENST00000591111	5	SKCM	6	TTN	20780	ENST00000591111	4	225	0.0016	0	0.994	0.8514	0.5521
RYR2:4137:06:ENST00000366574	4	SKCM	6	RYR2	4137	ENST00000366574	4	66	0.0017	0	0.9965	0.9266	0.6899
EGFR:746:01:ENST00000275493	17	LUAD	1	EGFR	746	ENST00000275493	15	41	0.0029	0.2154	0.014	0.9774	0.8357
TP53:196:01:ENST00000269305	8	BRCA	1	TP53	196	ENST00000269305	8	315	0.0052	0	0.9956	0.3509	0.1187
TP53:176:01:ENST00000269305	5	LUSC	1	TP53	176	ENST00000269305	5	362	0.0057	4.1114	0.002	0.4727	0.0844
CDKN2A:108:01:ENST00000304494	6	LUSC	1	CDKN2A	108	ENST00000304494	6	64	0.0078	3.4209	0.0082	0.3123	0.0342
UPF3A:267:01:ENST00000375299	15	UCEC	1	UPF3A	267	ENST00000375299	12	6	0.008	NA	0.9992	0.2214	0.0694
SALL1:675:06:ENST00000251020	6	SKCM	6	SALL1	675	ENST00000251020	5	37	0.0107	0	0.9979	1	0.9924
PPP2R1A:179:01:ENST00000322088	26	UCEC	1	PPP2R1A	179	ENST00000322088	26	38	0.0146	4.7896	0.0119	0.4149	0.1954
ATF7IP:320:01:ENST00000261168	10	UCEC	1	ATF7IP	320	ENST00000261168	7	14	0.0148	NA	0.9993	0.9756	0.8222
AKT1:17:01:ENST00000349310	25	BRCA	1	AKT1	17	ENST00000349310	24	4	0.0156	0	0.9997	0.9996	0.9787
TP53:125:01:ENST00000269305	4	LGG	1	TP53	125	ENST00000269305	4	222	0.0158	5.249	0.0061	0.6706	0.3127
TP53:266:01:ENST00000269305	6	OV	1	TP53	266	ENST00000269305	5	359	0.0162	3.2259	0.0101	0.516	0.1049
RUNX1:96:01:ENST00000344691	7	BRCA	1	RUNX1	96	ENST00000344691	7	30	0.0171	0	0.9991	0.7131	0.3969
APC:876:01:ENST00000257430	10	READ	1	APC	876	ENST00000257430	8	94	0.0174	0	0.9975	0.775	0.4609
TP53:306:01:ENST00000269305	6	HNSC	1	TP53	306	ENST00000269305	6	310	0.0181	4.3929	0.0013	0.8017	0.5549
TP53:179:01:ENST00000269305	5	OV	1	TP53	179	ENST00000269305	5	359	0.0194	0.1838	0.0913	0.9003	0.6596
AKAP9:39:01:ENST00000356239	11	STAD	1	AKAP9	39	ENST00000356239	4	21	0.0213	0	0.9982	0.9147	0.6804
TP53:159:01:ENST00000269305	4	LUAD	1	TP53	159	ENST00000269305	4	217	0.0216	3.079	0.029	0.3114	0.0317
VHL:158:01:ENST00000256474	7	KIRC	1	VHL	158	ENST00000256474	7	158	0.0247	2.8746	0.0271	0.4491	0.1549
EGFR:289:01:ENST00000275493	4	LGG	1	EGFR	289	ENST00000275493	4	26	0.0249	0.1758	0.0947	0.9555	0.7578
TP53:193:01:ENST00000269305	9	HNSC	1	TP53	193	ENST00000269305	9	307	0.026	2.8663	0.0068	0.9803	0.8374
APC:1489:01:ENST00000257430	4	COAD	1	APC	1489	ENST00000257430	4	253	0.0263	0	0.9964	0.55	0.2401
BRAF:600:06:ENST00000288602	177	SKCM	6	BRAF	600	ENST00000288602	141	16	0.0271	0.4244	0.0095	0.6817	0.4099
PSME4:1805:01:ENST00000404125	11	STAD	1	PSME4	1805	ENST00000404125	6	7	0.0291	0	0.9992	0.1118	0.02
TP53:244:01:ENST00000269305	5	OV	1	TP53	244	ENST00000269305	5	359	0.034	0.2008	0.1096	1	0.9924
FBXW7:505:01:ENST00000281708	6	COAD	1	FBXW7	505	ENST00000281708	5	40	0.0353	4.354	0.0568	0.378	0.1206
TP53:280:01:ENST00000269305	4	LUSC	1	TP53	280	ENST00000269305	4	363	0.0369	7.3318	0.0007	0.7047	0.4735
DOCK3:1852:01:ENST00000266037	16	COAD	1	DOCK3	1852	ENST00000266037	7	12	0.037	0	0.9992	0.8861	0.6241
OR14K1:14:01:ENST00000283225	17	UCEC	1	OR14K1	14	ENST00000283225	13	5	0.0373	0	0.9997	0.9768	0.8302
ERBB3:104:01:ENST00000267101	4	UCEC	1	ERBB3	104	ENST00000267101	4	21	0.0384	1	NA	0.6447	0.3221
MROH2B:173:06:ENST00000399564	6	SKCM	6	MROH2B	173	ENST00000399564	4	64	0.0389	8.1185	0.0015	0.7559	0.5103
ACVR1:375:01:ENST00000263640	4	UCEC	1	ACVR1	375	ENST00000263640	4	16	0.0396	NA	0.9997	0.6624	0.393
BMPR2:583:01:ENST00000374580	14	COAD	1	BMPR2	583	ENST00000374580	9	8	0.0407	NA	0.9994	0.5328	0.2714
SOX9:257:01:ENST00000245479	4	COAD	1	SOX9	257	ENST00000245479	4	46	0.0414	0	0.9988	0.4525	0.1785
KAT6B:1203:01:ENST00000287239	6	LGG	1	KAT6B	1203	ENST00000287239	6	5	0.0433	NA	0.9993	0.9954	0.9234
CDH1:126:01:ENST00000261769	4	UCEC	1	CDH1	126	ENST00000261769	4	14	0.0438	NA	0.9992	0.0301	0.0432
TP53:132:01:ENST00000269305	5	COAD	1	TP53	132	ENST00000269305	4	191	0.0439	4.3347	0.0148	0.6388	0.2825
ZMYND8:635:01:ENST00000311275	7	UCEC	1	ZMYND8	635	ENST00000311275	6	18	0.0446	0	0.9995	0.9568	0.7645
TP53:126:01:ENST00000269305	6	LUSC	1	TP53	126	ENST00000269305	6	361	0.0451	4.5388	0.003	0.7272	0.4672
TP53:238:01:ENST00000269305	4	GBM	1	TP53	238	ENST00000269305	4	102	0.0456	3.4847	0.0187	0.7673	0.3081
SLC25A52:88:06:ENST00000269205	4	SKCM	6	SLC25A52	88	ENST00000269205	4	5	0.0476	0.1237	0.0689	0.5134	0.193
DDX17:121:01:ENST00000403230	4	UCEC	1	DDX17	121	ENST00000403230	4	8	0.0485	NA	0.9998	0.5028	0.2708
GANAB:23:01:ENST00000356638	4	UCEC	1	GANAB	23	ENST00000356638	4	7	0.0485	NA	0.9995	0.5176	0.2925
PHF3:1137:01:ENST00000262043	5	UCEC	1	PHF3	1137	ENST00000262043	5	17	0.0505	NA	0.9996	0.4141	0.1653
EP300:1399:01:ENST00000263253	5	HNSC	1	EP300	1399	ENST00000263253	5	28	0.0511	0.2049	0.1282	0.8945	0.6285
SOX17:403:01:ENST00000297316	11	UCEC	1	SOX17	403	ENST00000297316	11	12	0.0519	NA	0.9996	0.5418	0.2697
TP53:175:01:ENST00000269305	27	COAD	1	TP53	175	ENST00000269305	22	173	0.0524	0.3862	0.1137	0.2694	0.091
TP53:175:01:ENST00000269305	11	ESCA	1	TP53	175	ENST00000269305	11	134	0.0527	0.3086	0.1025	0.9661	0.7977
APC:1114:01:ENST00000257430	7	READ	1	APC	1114	ENST00000257430	5	97	0.0531	0	0.9979	0.65	0.3237
ARID1A:1989:01:ENST00000324856	20	UCEC	1	ARID1A	1989	ENST00000324856	5	180	0.0558	0	0.9977	0.5741	0.2602
SMTN:239:01:ENST00000347557	7	UCEC	1	SMTN	239	ENST00000347557	6	11	0.0572	NA	0.9996	0.8844	0.6164
TTI1:924:01:ENST00000373447	6	UCEC	1	TTI1	924	ENST00000373447	6	13	0.0573	NA	0.9996	0.3709	0.145
PPIG:12:01:ENST00000260970	4	UCEC	1	PPIG	12	ENST00000260970	4	13	0.0588	0	0.9996	0.8591	0.5745
PTEN:267:01:ENST00000371953	8	STAD	1	PTEN	267	ENST00000371953	5	14	0.0602	3.7811	0.0639	0.9645	0.7816
TP53:273:01:ENST00000269305	7	GBM	1	TP53	273	ENST00000269305	6	100	0.0612	0.2988	0.0975	0.4651	0.2617
TP53:248:01:ENST00000269305	4	LUAD	1	TP53	248	ENST00000269305	4	217	0.0623	0	0.9959	0.9997	0.9798
CIC:215:01:ENST00000575354	12	LGG	1	CIC	215	ENST00000575354	12	86	0.0627	0	0.9987	0.7469	0.4306
MYO15A:2536:01:ENST00000205890	4	BRCA	1	MYO15A	2536	ENST00000205890	4	10	0.0659	0	0.9994	0.936	0.7142
RIMS2:256:01:ENST00000262231	4	STAD	1	RIMS2	256	ENST00000262231	4	25	0.0664	17.0677	0.0216	0.0021	0.0153
SF3B1:902:01:ENST00000335508	7	BLCA	1	SF3B1	902	ENST00000335508	6	12	0.0666	3.4753	0.0914	0.485	0.1913
PTEN:7:01:ENST00000371953	8	UCEC	1	PTEN	7	ENST00000371953	4	253	0.0666	0	0.9961	0.6495	0.32
EEF1A1:432:01:ENST00000309268	8	LIHC	1	EEF1A1	432	ENST00000309268	4	7	0.0667	8.6822	0.0685	0.949	0.7393
LNPEP:145:01:ENST00000231368	6	STAD	1	LNPEP	145	ENST00000231368	4	6	0.0667	NA	0.9993	0.8075	0.4915
COBLL1:945:01:ENST00000392717	8	UCEC	1	COBLL1	945	ENST00000392717	5	11	0.0668	NA	0.9995	0.9466	0.7443
ZBTB20:692:01:ENST00000474710	21	COAD	1	ZBTB20	692	ENST00000474710	12	5	0.0669	0.1121	0.081	0.1674	0.0899
KRAS:12:01:ENST00000256078	131	PAAD	1	KRAS	12	ENST00000256078	128	7	0.0674	0.4054	0.0363	0.9469	0.7288
KRAS:61:01:ENST00000256078	8	PAAD	1	KRAS	61	ENST00000256078	7	128	0.0674	2.4667	0.0363	0.9469	0.7288
TP53:220:01:ENST00000269305	5	LUSC	1	TP53	220	ENST00000269305	5	362	0.0678	2.9227	0.0348	0.8189	0.4883
AMER1:497:01:ENST00000330258	5	COAD	1	AMER1	497	ENST00000330258	5	31	0.0683	4.3882	0.0434	0.6162	0.3749
CTNNB1:37:01:ENST00000349496	21	UCEC	1	CTNNB1	37	ENST00000349496	19	78	0.0684	3.0433	0.0577	0.8909	0.6254
EGFR:858:01:ENST00000275493	23	LUAD	1	EGFR	858	ENST00000275493	21	35	0.0686	2.0872	0.0738	0.954	0.7547
ACTB:158:01:ENST00000331789	4	BLCA	1	ACTB	158	ENST00000331789	4	11	0.0689	0	0.9992	0.9732	0.8151
SIPA1L1:58:01:ENST00000555818	6	UCEC	1	SIPA1L1	58	ENST00000555818	4	21	0.0689	0	0.9995	0.4493	0.1841
FBXW7:545:01:ENST00000281708	4	UCEC	1	FBXW7	545	ENST00000281708	4	65	0.0698	6.1491	0.0305	0.7061	0.4432
CDH11:357:01:ENST00000268603	4	STAD	1	CDH11	357	ENST00000268603	4	20	0.07	5.6707	0.0339	0.8883	0.6488
MYO9A:1422:01:ENST00000356056	4	UCEC	1	MYO9A	1422	ENST00000356056	4	24	0.0714	NA	0.9996	0.4103	0.1519
PIK3CA:38:01:ENST00000263967	12	UCEC	1	PIK3CA	38	ENST00000263967	10	200	0.0714	2.6906	0.069	0.2384	0.0644
KRAS:12:01:ENST00000256078	11	BLCA	1	KRAS	12	ENST00000256078	10	5	0.0719	6.4622	0.0903	0.9867	0.869
BRWD1:2309:01:ENST00000333229	8	STAD	1	BRWD1	2309	ENST00000333229	4	13	0.0723	3.5354	0.0721	0.3981	0.072
PIK3CA:111:01:ENST00000263967	5	UCEC	1	PIK3CA	111	ENST00000263967	4	206	0.0725	0	0.9973	0.75	0.4224
NRAS:61:06:ENST00000369535	94	SKCM	6	NRAS	61	ENST00000369535	86	8	0.0728	0.4688	0.0638	0.5714	0.2294
NFE2L2:29:01:ENST00000397062	14	LUSC	1	NFE2L2	29	ENST00000397062	14	57	0.0736	2.2776	0.0575	0.9246	0.6867
C9orf131:344:01:ENST00000312292	6	UCEC	1	C9orf131	344	ENST00000312292	6	10	0.0749	NA	0.9996	0.4096	0.1795
FHOD3:336:01:ENST00000359247	7	UCEC	1	FHOD3	336	ENST00000359247	6	17	0.0757	8.4852	0.0868	0.5215	0.2851
DDX17:504:06:ENST00000403230	4	SKCM	6	DDX17	504	ENST00000403230	4	6	0.0762	9.0782	0.059	0.4724	0.1758
NF1:78:01:ENST00000358273	4	UCEC	1	NF1	78	ENST00000358273	4	22	0.0768	5.4236	0.0541	0.4491	0.271
BNC2:575:01:ENST00000380672	4	STAD	1	BNC2	575	ENST00000380672	4	13	0.0773	13.1918	0.0388	0.1119	0.072
RNF152:95:06:ENST00000312828	5	SKCM	6	RNF152	95	ENST00000312828	4	5	0.0794	NA	0.9993	0.9487	0.7487
VHL:65:01:ENST00000256474	4	KIRC	1	VHL	65	ENST00000256474	4	161	0.0797	2.7805	0.089	0.5357	0.1978
ACTN4:874:01:ENST00000252699	4	UCEC	1	ACTN4	874	ENST00000252699	4	8	0.0808	NA	0.9996	0.6462	0.3288
RAI1:799:01:ENST00000353383	4	UCEC	1	RAI1	799	ENST00000353383	4	21	0.0814	7.1416	0.1116	0.3793	0.1275
NPAP1:210:06:ENST00000329468	8	SKCM	6	NPAP1	210	ENST00000329468	4	56	0.0856	0.2517	0.1751	0.9757	0.8274
RNF128:11:01:ENST00000324342	6	UCEC	1	RNF128	11	ENST00000324342	5	7	0.0859	NA	0.9996	0.9349	0.7104
DPYD:204:06:ENST00000370192	5	SKCM	6	DPYD	204	ENST00000370192	5	39	0.0862	0.3639	0.1773	0.3941	0.1383
ANKRD30A:1129:06:ENST00000611781	4	SKCM	6	ANKRD30A	1129	ENST00000611781	4	48	0.0868	5.8982	0.0069	0.2053	0.1863
ALPK2:523:01:ENST00000361673	6	UCEC	1	ALPK2	523	ENST00000361673	4	24	0.0873	0	0.999	0.5203	0.2245
TTC3:779:01:ENST00000354749	5	UCEC	1	TTC3	779	ENST00000354749	5	23	0.0878	7.7353	0.0951	0.8984	0.6536
TP53:278:01:ENST00000269305	10	LUSC	1	TP53	278	ENST00000269305	10	357	0.0893	0.3544	0.1451	0.9689	0.8024
TP53:234:01:ENST00000269305	9	LUSC	1	TP53	234	ENST00000269305	9	358	0.0902	1.7235	0.1353	0.1072	0.0091
TP53:161:01:ENST00000269305	5	BLCA	1	TP53	161	ENST00000269305	4	177	0.0941	4.1287	0.0169	0.7332	0.4942
TICAM1:642:01:ENST00000248244	9	STAD	1	TICAM1	642	ENST00000248244	4	5	0.0952	0	0.9993	0.9105	0.661
OR6P1:32:01:ENST00000334632	4	UCEC	1	OR6P1	32	ENST00000334632	4	5	0.0952	NA	0.9994	0.5265	0.2893
TRPV3:87:01:ENST00000576742	4	UCEC	1	TRPV3	87	ENST00000576742	4	6	0.0952	NA	0.9996	0.9003	0.6445
PIK3CA:1047:01:ENST00000263967	21	COAD	1	PIK3CA	1047	ENST00000263967	16	73	0.0954	0.2526	0.1839	0.4655	0.2039
TP53:220:01:ENST00000269305	7	HNSC	1	TP53	220	ENST00000269305	5	311	0.0957	0.2702	0.1929	0.9762	0.8223
TP53:248:01:ENST00000269305	21	OV	1	TP53	248	ENST00000269305	21	343	0.0975	1.757	0.0498	0.6765	0.4004
PIK3R1:576:01:ENST00000521381	7	UCEC	1	PIK3R1	576	ENST00000521381	7	121	0.0977	0	0.9976	0.9905	0.8921
OR4A15:183:06:ENST00000314706	4	SKCM	6	OR4A15	183	ENST00000314706	4	24	0.098	3.8528	0.0492	0.9989	0.9618
ERBB2:310:01:ENST00000269571	22	BLCA	1	ERBB2	310	ENST00000269571	20	22	0.1001	2.3754	0.1032	0.4596	0.2203
PTEN:170:01:ENST00000371953	4	UCEC	1	PTEN	170	ENST00000371953	4	253	0.1025	4.2907	0.048	0.939	0.7119
TUBGCP2:883:01:ENST00000252936	4	UCEC	1	TUBGCP2	883	ENST00000252936	4	13	0.1025	6.7862	0.1216	0.996	0.929
TP53:176:01:ENST00000269305	6	HNSC	1	TP53	176	ENST00000269305	6	310	0.1029	0.401	0.2031	0.3675	0.1167
RP1:1118:06:ENST00000220676	4	SKCM	6	RP1	1118	ENST00000220676	4	101	0.1029	0.2852	0.2171	0.8655	0.5751
CELSR2:2017:01:ENST00000271332	4	UCEC	1	CELSR2	2017	ENST00000271332	4	26	0.1035	5.2138	0.101	0.7796	0.4544
ARID1A:1721:01:ENST00000324856	5	UCEC	1	ARID1A	1721	ENST00000324856	4	181	0.1038	0	0.9979	0.7105	0.3799
STAB2:243:06:ENST00000388887	4	SKCM	6	STAB2	243	ENST00000388887	4	52	0.1048	0.4086	0.2237	0.2633	0.0595
EPHA2:460:01:ENST00000358432	10	UCEC	1	EPHA2	460	ENST00000358432	10	9	0.1053	0	0.9996	0.5552	0.2786
KRAS:13:01:ENST00000256078	12	STAD	1	KRAS	13	ENST00000256078	6	21	0.1056	3.9211	0.0649	0.6914	0.4206
MYH2:1382:06:ENST00000245503	5	SKCM	6	MYH2	1382	ENST00000245503	5	68	0.1059	0.2567	0.1801	0.8592	0.5925
TP53:248:01:ENST00000269305	23	BLCA	1	TP53	248	ENST00000269305	22	159	0.1065	1.7124	0.0762	0.9831	0.853
TP53:282:01:ENST00000269305	5	BRCA	1	TP53	282	ENST00000269305	5	318	0.1082	4.6302	0.0354	0.9431	0.7406
SP140:672:01:ENST00000392045	7	UCEC	1	SP140	672	ENST00000392045	5	6	0.1082	NA	0.9996	0.7062	0.4131
EGFR:289:01:ENST00000275493	21	GBM	1	EGFR	289	ENST00000275493	21	61	0.1095	0.628	0.123	0.8276	0.5441
OR2A5:71:06:ENST00000408906	7	SKCM	6	OR2A5	71	ENST00000408906	4	16	0.1102	0.3518	0.1823	0.5414	0.2405
FSIP2:2680:01:ENST00000424728	6	UCEC	1	FSIP2	2680	ENST00000424728	5	29	0.112	0	0.9994	0.7766	0.4628
NFE2L2:79:01:ENST00000397062	5	HNSC	1	NFE2L2	79	ENST00000397062	5	20	0.113	2.4669	0.1087	0.8044	0.3763
PIK3R1:642:01:ENST00000521381	7	UCEC	1	PIK3R1	642	ENST00000521381	5	123	0.1131	0	0.9967	0.9906	0.893
RYR2:4063:01:ENST00000366574	4	COAD	1	RYR2	4063	ENST00000366574	4	55	0.1135	0	0.998	0.9681	0.8063
KLF5:419:01:ENST00000377687	5	LUSC	1	KLF5	419	ENST00000377687	4	4	0.1143	0	0.9993	0.9968	0.9355
OXER1:78:01:ENST00000378661	4	UCEC	1	OXER1	78	ENST00000378661	4	4	0.1143	NA	0.9997	0.4983	0.2317
PTEN:57:01:ENST00000371953	5	UCEC	1	PTEN	57	ENST00000371953	4	253	0.1153	3.9349	0.0611	0.9346	0.7014
FBXW7:505:01:ENST00000281708	7	BLCA	1	FBXW7	505	ENST00000281708	7	20	0.1159	2.5613	0.0952	0.9999	0.9867
KCNB2:146:01:ENST00000523207	8	UCEC	1	KCNB2	146	ENST00000523207	7	8	0.1175	NA	0.9994	0.9652	0.7909
OR51S1:241:06:ENST00000322101	5	SKCM	6	OR51S1	241	ENST00000322101	5	19	0.118	0.2543	0.1906	0.9312	0.7013
SPOP:131:01:ENST00000347630	14	PRAD	1	SPOP	131	ENST00000347630	14	41	0.1186	0	0.9994	0.881	0.6106
AOC1:741:01:ENST00000360937	5	UCEC	1	AOC1	741	ENST00000360937	5	9	0.1189	NA	0.9996	0.9213	0.6802
RAC1:159:01:ENST00000348035	6	HNSC	1	RAC1	159	ENST00000348035	5	5	0.119	4.9029	0.1738	0.7601	0.4728
ZMYM2:1250:01:ENST00000382871	4	UCEC	1	ZMYM2	1250	ENST00000382871	4	27	0.121	5.099	0.1051	0.1934	0.0344
FCRL3:272:01:ENST00000368184	7	COAD	1	FCRL3	272	ENST00000368184	4	7	0.1212	NA	0.9996	0.9656	0.7932
RBM6:834:01:ENST00000266022	7	UCEC	1	RBM6	834	ENST00000266022	6	5	0.1212	0	0.9993	0.8776	0.6048
RHOA:42:01:ENST00000418115	5	STAD	1	RHOA	42	ENST00000418115	5	13	0.1225	4.3516	0.1098	0.8207	0.5478
RNF43:659:01:ENST00000407977	22	STAD	1	RNF43	659	ENST00000407977	8	13	0.1231	0.3321	0.1368	0.6613	0.367
DDX27:691:01:ENST00000371764	9	UCEC	1	DDX27	691	ENST00000371764	8	8	0.1249	NA	0.9996	0.9998	0.9848
OFD1:237:01:ENST00000340096	4	UCEC	1	OFD1	237	ENST00000340096	4	7	0.1273	NA	0.9994	0.849	0.5591
CTNNB1:45:06:ENST00000349496	5	SKCM	6	CTNNB1	45	ENST00000349496	5	11	0.1277	0.1912	0.1465	0.6037	0.2808
TP53:249:01:ENST00000269305	10	LIHC	1	TP53	249	ENST00000269305	10	89	0.1279	2.0676	0.1061	0.9827	0.8441
TP53:245:01:ENST00000269305	4	BLCA	1	TP53	245	ENST00000269305	4	177	0.1291	0.3165	0.2534	0.9812	0.8429
TOP2A:215:01:ENST00000423485	4	OV	1	TOP2A	215	ENST00000423485	4	14	0.1301	2.6633	0.1241	0.677	0.2338
TP53:248:01:ENST00000269305	14	LGG	1	TP53	248	ENST00000269305	14	212	0.1312	0.413	0.2211	0.8129	0.5077
TP53:249:01:ENST00000269305	7	LUSC	1	TP53	249	ENST00000269305	7	360	0.1314	0.4194	0.2257	0.8153	0.5047
TP53:278:01:ENST00000269305	5	HNSC	1	TP53	278	ENST00000269305	4	312	0.1322	0.3047	0.2401	0.8269	0.5167
ARID1A:1335:01:ENST00000324856	5	UCEC	1	ARID1A	1335	ENST00000324856	4	181	0.1346	0	0.998	0.1451	0.0251
PIK3CA:726:01:ENST00000263967	6	CESC	1	PIK3CA	726	ENST00000263967	5	55	0.1369	2.7224	0.1237	0.7967	0.4708
ERBB2:777:01:ENST00000269571	4	BRCA	1	ERBB2	777	ENST00000269571	4	22	0.1389	3.3104	0.2336	0.72	0.3887
TCF7L2:488:01:ENST00000355995	7	COAD	1	TCF7L2	488	ENST00000355995	5	13	0.1389	NA	0.9997	0.9867	0.8709
TP53:245:01:ENST00000269305	4	UCEC	1	TP53	245	ENST00000269305	4	170	0.1392	0	0.9968	0.9881	0.8755
MROH2B:1426:01:ENST00000399564	5	UCEC	1	MROH2B	1426	ENST00000399564	4	23	0.142	6.501	0.1281	0.1186	0.087
KRAS:13:01:ENST00000256078	15	UCEC	1	KRAS	13	ENST00000256078	14	75	0.1421	0	0.9986	0.5457	0.289
OR6C75:200:01:ENST00000343399	6	UCEC	1	OR6C75	200	ENST00000343399	4	4	0.1429	NA	0.9994	0.8246	0.5434
PIK3CA:93:01:ENST00000263967	11	UCEC	1	PIK3CA	93	ENST00000263967	8	202	0.1438	0	0.9968	0.8947	0.628
TP53:32:01:ENST00000269305	4	HNSC	1	TP53	32	ENST00000269305	4	312	0.1441	3.0551	0.0562	0.9323	0.7263
BRAF:600:01:ENST00000288602	49	COAD	1	BRAF	600	ENST00000288602	28	9	0.1449	0.3029	0.1622	0.845	0.5681
TP53:157:01:ENST00000269305	5	LUAD	1	TP53	157	ENST00000269305	5	216	0.1461	0.4926	0.3246	0.0695	0.0063
MAX:28:01:ENST00000358664	6	UCEC	1	MAX	28	ENST00000358664	6	5	0.1472	0	0.9994	0.7231	0.4334
DHX15:30:01:ENST00000336812	6	UCEC	1	DHX15	30	ENST00000336812	6	5	0.1515	0	0.9996	0.4334	0.1943
HIAT1:269:01:ENST00000370152	6	UCEC	1	HIAT1	269	ENST00000370152	6	5	0.1515	0	0.9996	0.7669	0.4551
MAP2K1:124:06:ENST00000307102	12	SKCM	6	MAP2K1	124	ENST00000307102	9	8	0.1517	3.9445	0.2201	0.8088	0.516
DPAGT1:233:01:ENST00000354202	7	UCEC	1	DPAGT1	233	ENST00000354202	6	4	0.1524	0	0.9996	0.9999	0.9881
ATP10D:617:01:ENST00000273859	6	UCEC	1	ATP10D	617	ENST00000273859	4	13	0.1555	NA	0.9995	0.6757	0.4029
CNTLN:1308:01:ENST00000380647	8	UCEC	1	CNTLN	1308	ENST00000380647	7	11	0.1555	NA	0.9996	0.6666	0.3777
TP53:280:01:ENST00000269305	4	LGG	1	TP53	280	ENST00000269305	4	222	0.1564	1.9371	0.2729	0.1894	0.0267
NFE2L2:82:01:ENST00000397062	5	UCEC	1	NFE2L2	82	ENST00000397062	5	22	0.1566	4.2842	0.1473	0.4317	0.1568
DCHS1:235:01:ENST00000299441	4	UCEC	1	DCHS1	235	ENST00000299441	4	35	0.1571	24.98	0.0229	0.1955	0.1237
TP53:125:01:ENST00000269305	7	LUSC	1	TP53	125	ENST00000269305	7	360	0.1581	0.2862	0.2125	0.7466	0.4681
CDK4:22:06:ENST00000257904	4	SKCM	6	CDK4	22	ENST00000257904	4	5	0.1587	0.2222	0.1853	0.2879	0.0584
PIK3CA:118:01:ENST00000263967	10	UCEC	1	PIK3CA	118	ENST00000263967	9	201	0.159	2.5255	0.1289	1	0.9978
TAF1L:665:01:ENST00000242310	4	UCEC	1	TAF1L	665	ENST00000242310	4	31	0.1593	5.6164	0.1601	0.1611	0.1076
TP53:248:01:ENST00000269305	5	LIHC	1	TP53	248	ENST00000269305	5	94	0.1616	0	0.9963	0.3897	0.2112
CDKN2A:80:06:ENST00000304494	4	SKCM	6	CDKN2A	80	ENST00000304494	4	32	0.1637	4.6587	0.078	0.8679	0.6146
TP53:172:01:ENST00000269305	4	LUSC	1	TP53	172	ENST00000269305	4	363	0.1639	0	0.9942	0.5183	0.3004
TP53:237:01:ENST00000269305	5	OV	1	TP53	237	ENST00000269305	5	359	0.1639	2.2778	0.105	0.9251	0.6752
GATA3:308:01:ENST00000346208	21	BRCA	1	GATA3	308	ENST00000346208	20	103	0.1653	0.5464	0.2919	0.0578	0.0119
TP53:271:01:ENST00000269305	4	LUSC	1	TP53	271	ENST00000269305	4	363	0.1659	0.3492	0.2952	0.9244	0.6809
TP53:205:01:ENST00000269305	4	UCEC	1	TP53	205	ENST00000269305	4	170	0.166	2.0022	0.248	0.2537	0.0469
TP53:248:01:ENST00000269305	13	GBM	1	TP53	248	ENST00000269305	12	94	0.167	0.6278	0.2196	0.7784	0.4618
TTK:854:01:ENST00000369798	8	UCEC	1	TTK	854	ENST00000369798	8	15	0.1675	4.6846	0.208	0.1467	0.0683
PTEN:267:01:ENST00000371953	6	COAD	1	PTEN	267	ENST00000371953	5	13	0.1681	0	0.9993	0.9977	0.9458
NRIP1:516:01:ENST00000318948	5	UCEC	1	NRIP1	516	ENST00000318948	5	18	0.1709	4.7847	0.2027	0.2359	0.0625
CCND1:286:01:ENST00000227507	7	UCEC	1	CCND1	286	ENST00000227507	7	20	0.1742	0	0.9993	0.9976	0.9447
KIT:418:03:ENST00000288135	4	LAML	3	KIT	418	ENST00000288135	4	5	0.1746	0	0.9993	0.4514	0.2262
KIT:816:03:ENST00000288135	5	LAML	3	KIT	816	ENST00000288135	5	4	0.1746	NA	0.9993	0.4514	0.2262
OR7E24:168:01:ENST00000456448	5	STAD	1	OR7E24	168	ENST00000456448	4	5	0.1746	4.2421	0.2136	0.9556	0.7605
GAS2L2:409:01:ENST00000604641	5	UCEC	1	GAS2L2	409	ENST00000604641	5	4	0.1746	0	0.9996	0.7088	0.3966
LARP7:405:01:ENST00000324052	5	UCEC	1	LARP7	405	ENST00000324052	4	5	0.1746	NA	0.9996	0.9981	0.9502
TRAM1L1:345:01:ENST00000310754	4	UCEC	1	TRAM1L1	345	ENST00000310754	4	5	0.1746	NA	0.9996	0.9656	0.7929
BOD1L1:570:01:ENST00000040738	4	UCEC	1	BOD1L1	570	ENST00000040738	4	16	0.1754	0	0.9994	0.9716	0.8123
SPOP:102:01:ENST00000347630	8	PRAD	1	SPOP	102	ENST00000347630	8	47	0.1764	NA	0.9995	0.9955	0.9242
MLH3:674:01:ENST00000355774	5	UCEC	1	MLH3	674	ENST00000355774	5	11	0.1767	5.244	0.2414	0.0024	0.0026
TP53:282:01:ENST00000269305	9	READ	1	TP53	282	ENST00000269305	8	84	0.1776	2.3715	0.1882	0.9012	0.6374
ARID1A:693:01:ENST00000324856	5	UCEC	1	ARID1A	693	ENST00000324856	4	181	0.1787	0	0.998	0.9665	0.7935
CTNNB1:41:01:ENST00000349496	12	UCEC	1	CTNNB1	41	ENST00000349496	11	86	0.1806	0	0.9979	0.9967	0.935
TP53:273:01:ENST00000269305	59	LGG	1	TP53	273	ENST00000269305	59	167	0.183	1.598	0.1412	0.3876	0.1778
PIK3CA:1043:01:ENST00000263967	4	LGG	1	PIK3CA	1043	ENST00000263967	4	32	0.1837	0	0.9987	0.998	0.9493
CYP7B1:332:01:ENST00000310193	4	STAD	1	CYP7B1	332	ENST00000310193	4	10	0.1838	8.1466	0.0877	0.1068	0.0675
ADAM32:611:06:ENST00000379907	4	SKCM	6	ADAM32	611	ENST00000379907	4	13	0.184	2.9869	0.157	0.9872	0.8745
USP9X:28:01:ENST00000324545	7	UCEC	1	USP9X	28	ENST00000324545	7	34	0.1848	3.206	0.1797	0.7622	0.481
TP53:175:01:ENST00000269305	13	STAD	1	TP53	175	ENST00000269305	11	165	0.186	0.265	0.1882	0.0144	0.0124
KMT2D:647:01:ENST00000301067	6	UCEC	1	KMT2D	647	ENST00000301067	5	92	0.1889	3.101	0.136	0.8334	0.5256
OR6N1:229:06:ENST00000335094	6	SKCM	6	OR6N1	229	ENST00000335094	4	11	0.189	0.2858	0.2446	0.9991	0.9663
ARID1A:1850:01:ENST00000324856	18	UCEC	1	ARID1A	1850	ENST00000324856	17	168	0.1901	2.3894	0.1723	0.2924	0.1417
ERBB3:104:01:ENST00000267101	4	CESC	1	ERBB3	104	ENST00000267101	4	6	0.1905	0.2368	0.2035	0.9852	0.8631
OR4N2:41:06:ENST00000315947	7	SKCM	6	OR4N2	41	ENST00000315947	7	12	0.1941	2.64	0.1541	0.8725	0.6137
KRAS:12:01:ENST00000256078	67	UCEC	1	KRAS	12	ENST00000256078	65	24	0.1947	3.552	0.2297	0.8022	0.5117
SCAF11:853:01:ENST00000369367	5	UCEC	1	SCAF11	853	ENST00000369367	5	12	0.1959	NA	0.9996	0.9384	0.7177
ARHGEF40:1487:01:ENST00000298694	5	UCEC	1	ARHGEF40	1487	ENST00000298694	4	19	0.1976	0	0.9991	0.99	0.8865
SLC6A6:392:01:ENST00000622186	5	UCEC	1	SLC6A6	392	ENST00000622186	5	10	0.1978	0	0.9993	0.8135	0.5128
THSD7B:1023:06:ENST00000272643	7	SKCM	6	THSD7B	1023	ENST00000272643	4	82	0.1992	0.3173	0.2708	0.9066	0.6441
APC:1114:01:ENST00000257430	10	COAD	1	APC	1114	ENST00000257430	7	250	0.2	0	0.9965	0.4801	0.261
IL37:202:06:ENST00000263326	6	SKCM	6	IL37	202	ENST00000263326	4	4	0.2	4.3084	0.2085	0.2231	0.0959
GABRB3:170:01:ENST00000311550	4	UCEC	1	GABRB3	170	ENST00000311550	4	4	0.2	0	0.9996	0.8448	0.5611
SPTLC3:97:06:ENST00000399002	10	SKCM	6	SPTLC3	97	ENST00000399002	4	12	0.2011	0.3049	0.2708	0.9911	0.8931
CTCF:377:01:ENST00000264010	10	UCEC	1	CTCF	377	ENST00000264010	9	83	0.2011	2.7634	0.1973	0.8861	0.6324
THSD7B:305:06:ENST00000272643	5	SKCM	6	THSD7B	305	ENST00000272643	5	81	0.2023	1.71	0.2665	0.1945	0.0122
UBQLN2:525:01:ENST00000338222	5	UCEC	1	UBQLN2	525	ENST00000338222	5	12	0.203	4.6504	0.2101	0.9134	0.6641
PIK3CA:111:01:ENST00000263967	5	BRCA	1	PIK3CA	111	ENST00000263967	5	298	0.2034	1.9938	0.3458	0.3434	0.1013
NFE2L2:31:01:ENST00000397062	7	LUSC	1	NFE2L2	31	ENST00000397062	6	65	0.2041	0.4556	0.299	0.9485	0.7399
TP53:278:01:ENST00000269305	4	ESCA	1	TP53	278	ENST00000269305	4	141	0.2051	0.37	0.325	0.9693	0.7967
PIK3CA:542:01:ENST00000263967	23	UCEC	1	PIK3CA	542	ENST00000263967	23	187	0.2066	0.2943	0.2294	0.3033	0.1403
ADD3:701:01:ENST00000356080	9	UCEC	1	ADD3	701	ENST00000356080	6	6	0.2078	4.5493	0.2202	0.3374	0.1565
MAGEC1:1046:01:ENST00000285879	5	COAD	1	MAGEC1	1046	ENST00000285879	4	24	0.2079	0	0.9989	0.8893	0.6376
TP53:273:01:ENST00000269305	5	PAAD	1	TP53	273	ENST00000269305	5	107	0.2098	0.4602	0.281	1	0.9999
OR6T1:179:06:ENST00000321252	4	SKCM	6	OR6T1	179	ENST00000321252	4	10	0.2098	6.0165	0.1449	0.5026	0.2848
TP53:261:01:ENST00000269305	5	STAD	1	TP53	261	ENST00000269305	5	171	0.2098	1.6206	0.3163	0.0413	0.0005
MYRF:264:01:ENST00000278836	6	UCEC	1	MYRF	264	ENST00000278836	4	9	0.2098	NA	0.9995	0.163	0.0898
ASXL2:330:01:ENST00000435504	4	BLCA	1	ASXL2	330	ENST00000435504	4	22	0.2103	4.984	0.0686	0.3636	0.2136
CDKN2A:88:01:ENST00000304494	5	HNSC	1	CDKN2A	88	ENST00000304494	4	87	0.2116	0.3476	0.2965	0.872	0.6173
CSMD3:2314:01:ENST00000297405	4	STAD	1	CSMD3	2314	ENST00000297405	4	74	0.2117	0	0.9966	0.7591	0.4853
ZBTB20:692:01:ENST00000474710	30	STAD	1	ZBTB20	692	ENST00000474710	9	6	0.2118	0.3755	0.1798	0.7126	0.4273
GLYATL1:76:06:ENST00000317391	5	SKCM	6	GLYATL1	76	ENST00000317391	4	7	0.2121	0	0.9994	0.9945	0.9163
APC:213:01:ENST00000257430	13	COAD	1	APC	213	ENST00000257430	12	245	0.2124	0.3173	0.2551	0.8673	0.6048
ZNF728:200:06:ENST00000594710	7	SKCM	6	ZNF728	200	ENST00000594710	6	13	0.2124	0.279	0.2456	0.5067	0.2322
TP53:175:01:ENST00000269305	13	READ	1	TP53	175	ENST00000269305	12	80	0.2126	2.5804	0.1513	0.7284	0.4422
CDKN2A:114:06:ENST00000304494	9	SKCM	6	CDKN2A	114	ENST00000304494	6	30	0.2129	2.4479	0.1978	0.9998	0.9829
RGPD4:1394:06:ENST00000408999	5	SKCM	6	RGPD4	1394	ENST00000408999	4	58	0.2142	0.3422	0.2964	0.9996	0.9763
RP1:1282:06:ENST00000220676	4	SKCM	6	RP1	1282	ENST00000220676	4	101	0.2167	2.4514	0.1387	0.9807	0.8485
GSE1:123:01:ENST00000253458	8	UCEC	1	GSE1	123	ENST00000253458	7	10	0.2203	NA	0.9994	0.4377	0.1895
TP53:248:01:ENST00000269305	11	LUSC	1	TP53	248	ENST00000269305	10	357	0.2215	2.0292	0.1209	0.6086	0.3551
ALDH2:289:01:ENST00000261733	6	UCEC	1	ALDH2	289	ENST00000261733	5	4	0.2222	0	0.9996	0.9819	0.8483
PIK3CA:542:01:ENST00000263967	41	BRCA	1	PIK3CA	542	ENST00000263967	38	265	0.2227	0.5733	0.2958	0.3193	0.1201
LARP4B:163:01:ENST00000316157	9	UCEC	1	LARP4B	163	ENST00000316157	7	11	0.2227	4.0222	0.2562	0.9961	0.9298
TP53:187:01:ENST00000269305	11	OV	1	TP53	187	ENST00000269305	10	354	0.2238	1.9141	0.1185	0.7758	0.5027
DHX36:193:01:ENST00000496811	5	UCEC	1	DHX36	193	ENST00000496811	4	9	0.2238	4.5427	0.217	0.9976	0.9443
SMAD4:361:01:ENST00000342988	4	PAAD	1	SMAD4	361	ENST00000342988	4	35	0.2247	0.4729	0.3227	0.7113	0.3832
TP53:280:01:ENST00000269305	15	BLCA	1	TP53	280	ENST00000269305	13	168	0.2248	0.5582	0.2556	0.733	0.4486
TP53:275:01:ENST00000269305	4	OV	1	TP53	275	ENST00000269305	4	360	0.2258	0.5114	0.3458	0.8438	0.5356
RGPD3:755:06:ENST00000409886	5	SKCM	6	RGPD3	755	ENST00000409886	4	36	0.2259	0	0.9977	0.0994	0.0669
PIK3R1:577:01:ENST00000521381	5	UCEC	1	PIK3R1	577	ENST00000521381	5	123	0.2273	0	0.9969	0.983	0.8558
CTCF:448:01:ENST00000264010	7	UCEC	1	CTCF	448	ENST00000264010	6	86	0.23	2.9724	0.1645	0.9981	0.9509
PLEKHA6:328:01:ENST00000272203	15	STAD	1	PLEKHA6	328	ENST00000272203	5	5	0.2302	0.2756	0.2495	0.7562	0.4413
ZNF106:482:01:ENST00000263805	11	STAD	1	ZNF106	482	ENST00000263805	4	8	0.2303	3.2504	0.1988	0.7276	0.3988
ASXL3:1370:06:ENST00000269197	7	SKCM	6	ASXL3	1370	ENST00000269197	6	67	0.2305	2.312	0.1161	0.5567	0.3402
TP53:245:01:ENST00000269305	10	HNSC	1	TP53	245	ENST00000269305	9	307	0.2309	0.5367	0.2863	0.9976	0.95
TP53:175:01:ENST00000269305	16	OV	1	TP53	175	ENST00000269305	15	349	0.2311	0.6235	0.2546	0.7197	0.4378
CTCF:318:01:ENST00000264010	4	UCEC	1	CTCF	318	ENST00000264010	4	88	0.2318	3.4006	0.2439	0.353	0.2124
C5orf42:2467:01:ENST00000425232	4	UCEC	1	C5orf42	2467	ENST00000425232	4	15	0.2322	0	0.9989	0.7428	0.4254
TEAD2:295:01:ENST00000311227	9	UCEC	1	TEAD2	295	ENST00000311227	7	8	0.2331	NA	0.9996	0.9969	0.9368
EGFR:252:01:ENST00000275493	4	GBM	1	EGFR	252	ENST00000275493	4	78	0.2336	0.5459	0.3088	0.9955	0.9238
TP53:298:01:ENST00000269305	6	HNSC	1	TP53	298	ENST00000269305	5	311	0.2348	1.8973	0.2069	0.775	0.4294
ZMYM2:1044:01:ENST00000382871	6	UCEC	1	ZMYM2	1044	ENST00000382871	5	26	0.2352	NA	0.999	0.2542	0.1388
PIK3CA:1021:01:ENST00000263967	7	UCEC	1	PIK3CA	1021	ENST00000263967	4	206	0.2353	0	0.9976	0.9785	0.8371
ACVR2A:437:01:ENST00000241416	25	UCEC	1	ACVR2A	437	ENST00000241416	23	14	0.2367	0.4121	0.246	0.9941	0.9138
TP53:331:01:ENST00000269305	5	LUAD	1	TP53	331	ENST00000269305	5	216	0.2368	0.3775	0.3342	0.9686	0.7961
ACVR2A:437:01:ENST00000241416	29	STAD	1	ACVR2A	437	ENST00000241416	15	7	0.24	0.4833	0.2558	0.1489	0.0305
WDFY3:1916:01:ENST00000295888	5	UCEC	1	WDFY3	1916	ENST00000295888	4	38	0.24	0	0.9985	0.9763	0.8292
KLF5:418:01:ENST00000377687	4	BLCA	1	KLF5	418	ENST00000377687	4	13	0.2403	2.479	0.2161	0.9993	0.9703
RHOB:172:01:ENST00000272233	6	BLCA	1	RHOB	172	ENST00000272233	5	17	0.2408	0.3069	0.2666	0.8464	0.5709
TP53:158:01:ENST00000269305	17	LUSC	1	TP53	158	ENST00000269305	16	351	0.241	0.6841	0.3284	0.3985	0.149
PIK3R1:575:01:ENST00000521381	5	UCEC	1	PIK3R1	575	ENST00000521381	5	123	0.2422	2.7682	0.1726	0.7804	0.5108
ATAD2B:307:01:ENST00000238789	5	UCEC	1	ATAD2B	307	ENST00000238789	5	17	0.2468	2.3599	0.2622	0.2359	0.0546
ACVR2A:437:01:ENST00000241416	13	COAD	1	ACVR2A	437	ENST00000241416	7	13	0.2469	0	0.9993	0.9821	0.8487
TP53:234:01:ENST00000269305	5	OV	1	TP53	234	ENST00000269305	5	359	0.2473	0.3301	0.2701	0.8308	0.5626
HRAS:12:01:ENST00000311189	11	HNSC	1	HRAS	12	ENST00000311189	11	16	0.2474	0.4109	0.2685	0.7993	0.5042
HRAS:13:01:ENST00000311189	4	THYM	1	HRAS	13	ENST00000311189	4	6	0.2476	1	NA	0.7471	0.4528
CDC25C:244:01:ENST00000323760	4	UCEC	1	CDC25C	244	ENST00000323760	4	6	0.2476	1	NA	0.6845	0.3943
CNGB3:78:06:ENST00000320005	4	SKCM	6	CNGB3	78	ENST00000320005	4	28	0.249	0.5418	0.3283	0.4749	0.104
TP53:187:01:ENST00000269305	4	SARC	1	TP53	187	ENST00000269305	4	78	0.2501	0.3896	0.3557	0.9759	0.8221
GNAZ:205:01:ENST00000615612	9	UCEC	1	GNAZ	205	ENST00000615612	8	5	0.2502	0	0.9994	0.8683	0.5905
OR2M2:165:06:ENST00000359682	5	SKCM	6	OR2M2	165	ENST00000359682	5	12	0.2511	0.3036	0.2735	0.3465	0.1367
ARID1A:2236:01:ENST00000324856	4	UCEC	1	ARID1A	2236	ENST00000324856	4	181	0.2511	0	0.998	0.9765	0.824
ILK:71:01:ENST00000299421	10	UCEC	1	ILK	71	ENST00000299421	9	5	0.2517	NA	0.9996	0.8007	0.4997
MUC16:5119:06:ENST00000397910	8	SKCM	6	MUC16	5119	ENST00000397910	5	203	0.2518	1.8404	0.2347	0.5841	0.2362
TTN:13056:06:ENST00000591111	4	SKCM	6	TTN	13056	ENST00000591111	4	225	0.2527	2.2766	0.1606	0.9993	0.9702
SVIL:1863:01:ENST00000355867	11	UCEC	1	SVIL	1863	ENST00000355867	10	26	0.2528	0.336	0.313	0.9039	0.6474
TP53:179:01:ENST00000269305	10	LUSC	1	TP53	179	ENST00000269305	9	358	0.2529	0.5652	0.3283	0.9211	0.6776
EPG5:1902:01:ENST00000282041	9	STAD	1	EPG5	1902	ENST00000282041	5	9	0.2537	3.0802	0.1744	0.4332	0.2363
TP53:194:01:ENST00000269305	5	BRCA	1	TP53	194	ENST00000269305	4	319	0.254	6.8091	0.0654	0.1573	0.1176
PTEN:136:01:ENST00000371953	7	UCEC	1	PTEN	136	ENST00000371953	7	250	0.2541	2.4959	0.2109	0.996	0.9301
TP53:245:01:ENST00000269305	6	LGG	1	TP53	245	ENST00000269305	6	220	0.2552	0.4349	0.4104	0.7391	0.4144
SIGLEC6:83:06:ENST00000425629	4	SKCM	6	SIGLEC6	83	ENST00000425629	4	15	0.2554	0	0.9987	0.8562	0.5687
AKAP7:79:01:ENST00000431975	10	UCEC	1	AKAP7	79	ENST00000431975	8	5	0.2564	0	0.9996	0.5643	0.3046
OR5B17:215:06:ENST00000357377	8	SKCM	6	OR5B17	215	ENST00000357377	6	4	0.2571	3.2048	0.2997	0.9798	0.8403
RIPPLY3:145:06:ENST00000329553	4	SKCM	6	RIPPLY3	145	ENST00000329553	4	4	0.2571	4.3084	0.2085	0.2231	0.0959
FBXW7:505:01:ENST00000281708	14	UCEC	1	FBXW7	505	ENST00000281708	12	57	0.2574	0.3627	0.338	0.2447	0.0805
MYO16:842:01:ENST00000356711	9	STAD	1	MYO16	842	ENST00000356711	4	16	0.2576	0	0.9988	0.0963	0.0544
TP53:213:01:ENST00000269305	6	BRCA	1	TP53	213	ENST00000269305	6	317	0.2596	0	0.9956	0.9696	0.8084
PTEN:16:01:ENST00000371953	4	UCEC	1	PTEN	16	ENST00000371953	4	253	0.2605	0	0.9965	0.952	0.747
TMC5:690:06:ENST00000396229	6	SKCM	6	TMC5	690	ENST00000396229	4	36	0.2609	0	0.998	0.8818	0.6274
TP53:306:01:ENST00000269305	4	OV	1	TP53	306	ENST00000269305	4	360	0.2616	1.7124	0.2873	0.4374	0.0699
TP53:157:01:ENST00000269305	4	HNSC	1	TP53	157	ENST00000269305	4	312	0.2619	0.3845	0.3411	0.9537	0.7503
RGS7:44:06:ENST00000366565	7	SKCM	6	RGS7	44	ENST00000366565	5	25	0.2619	0.3374	0.2954	0.5284	0.2902
NFE2L2:34:01:ENST00000397062	16	LUSC	1	NFE2L2	34	ENST00000397062	16	55	0.2622	0.6159	0.3044	0.3945	0.1563
CTNNB1:35:01:ENST00000349496	4	LIHC	1	CTNNB1	35	ENST00000349496	4	78	0.2633	0	0.997	0.8791	0.5982
SF3B1:625:06:ENST00000335508	5	SKCM	6	SF3B1	625	ENST00000335508	5	9	0.2647	0	0.9993	0.743	0.4517
TICAM1:642:01:ENST00000248244	7	UCEC	1	TICAM1	642	ENST00000248244	6	7	0.2657	0	0.9994	0.9749	0.8218
RAC1:29:06:ENST00000348035	18	SKCM	6	RAC1	29	ENST00000348035	13	4	0.2664	0.4127	0.2313	0.9927	0.9021
PROX2:301:06:ENST00000556489	5	SKCM	6	PROX2	301	ENST00000556489	4	7	0.2667	2.679	0.2408	0.9446	0.7435
GRIK4:604:01:ENST00000438375	4	UCEC	1	GRIK4	604	ENST00000438375	4	6	0.2667	NA	0.9996	0.6794	0.3981
HTR1F:310:01:ENST00000319595	4	UCEC	1	HTR1F	310	ENST00000319595	4	6	0.2667	NA	0.9996	0.0966	0.0443
TP53:273:01:ENST00000269305	20	OV	1	TP53	273	ENST00000269305	19	345	0.2669	0.7416	0.3358	0.2459	0.0697
TUSC3:66:01:ENST00000503731	4	STAD	1	TUSC3	66	ENST00000503731	4	10	0.2677	4.1684	0.2458	0.9993	0.9694
TP53:193:01:ENST00000269305	5	OV	1	TP53	193	ENST00000269305	5	359	0.2695	0.6091	0.3946	0.8764	0.5872
SCAP:116:06:ENST00000265565	4	SKCM	6	SCAP	116	ENST00000265565	4	5	0.2698	0.2919	0.2889	0.529	0.2715
ZC3H18:680:01:ENST00000301011	8	UCEC	1	ZC3H18	680	ENST00000301011	7	20	0.2704	3.622	0.2983	0.9167	0.6723
PIK3CA:1047:01:ENST00000263967	5	UCS	1	PIK3CA	1047	ENST00000263967	5	13	0.2708	2.2627	0.1989	0.4017	0.2547
TP53:307:01:ENST00000269305	5	LUSC	1	TP53	307	ENST00000269305	5	362	0.2713	0.6416	0.4483	0.2315	0.0473
FBXW7:423:01:ENST00000281708	8	UCEC	1	FBXW7	423	ENST00000281708	8	61	0.2716	2.4053	0.2675	0.8033	0.5256
PIK3CA:545:01:ENST00000263967	27	UCEC	1	PIK3CA	545	ENST00000263967	26	184	0.2726	0.4647	0.2954	0.8451	0.5674
NLRP11:1016:06:ENST00000589093	4	SKCM	6	NLRP11	1016	ENST00000589093	4	32	0.273	0.3389	0.3037	0.9992	0.9689
TP53:248:01:ENST00000269305	10	PAAD	1	TP53	248	ENST00000269305	10	102	0.2741	1.6447	0.2169	0.9421	0.7376
PCLO:4044:06:ENST00000333891	4	SKCM	6	PCLO	4044	ENST00000333891	4	134	0.2766	0.5501	0.4094	0.5636	0.2377
TP53:151:01:ENST00000269305	5	HNSC	1	TP53	151	ENST00000269305	5	311	0.2767	1.7665	0.2623	0.8082	0.4733
MB21D2:311:01:ENST00000392452	7	LUSC	1	MB21D2	311	ENST00000392452	5	9	0.2767	3.1416	0.219	0.9698	0.8065
ADH1B:257:06:ENST00000305046	5	SKCM	6	ADH1B	257	ENST00000305046	5	20	0.2773	1.9895	0.247	0.9951	0.9216
ARID1A:1519:01:ENST00000324856	4	UCEC	1	ARID1A	1519	ENST00000324856	4	181	0.2773	0	0.998	0.776	0.4528
PAX3:424:01:ENST00000350526	5	COAD	1	PAX3	424	ENST00000350526	5	7	0.2778	1	NA	0.2354	0.0795
AHDC1:586:01:ENST00000247087	5	UCEC	1	AHDC1	586	ENST00000247087	4	7	0.2788	NA	0.9995	0.2122	0.1022
ARID1A:551:01:ENST00000324856	7	UCEC	1	ARID1A	551	ENST00000324856	5	180	0.2788	2.9403	0.2972	0.5004	0.2886
PIK3C2G:1231:06:ENST00000266497	4	SKCM	6	PIK3C2G	1231	ENST00000266497	4	32	0.279	2.2014	0.2236	0.9761	0.8312
TP53:152:01:ENST00000269305	5	STAD	1	TP53	152	ENST00000269305	5	171	0.279	0.3943	0.3562	0.9369	0.727
OCA2:614:01:ENST00000354638	4	UCEC	1	OCA2	614	ENST00000354638	4	10	0.2797	0	0.9993	0.2723	0.1265
FBXW7:465:01:ENST00000281708	16	UCEC	1	FBXW7	465	ENST00000281708	13	56	0.2808	0.3848	0.3661	0.4405	0.185
TP53:173:01:ENST00000269305	4	BRCA	1	TP53	173	ENST00000269305	4	319	0.2809	4.9182	0.1181	0.2639	0.1669
NIPBL:603:01:ENST00000282516	6	UCEC	1	NIPBL	603	ENST00000282516	6	37	0.2819	3.0958	0.3219	0.0319	0.0295
TP53:236:01:ENST00000269305	5	HNSC	1	TP53	236	ENST00000269305	4	312	0.2823	0.3933	0.3532	0.9999	0.9926
GATA3:335:01:ENST00000346208	12	BRCA	1	GATA3	335	ENST00000346208	12	111	0.2826	3.5757	0.1057	0.1542	0.0793
PAX6:375:01:ENST00000241001	9	UCEC	1	PAX6	375	ENST00000241001	9	6	0.2853	0	0.9994	0.3913	0.1679
TP53:245:01:ENST00000269305	8	LUAD	1	TP53	245	ENST00000269305	6	215	0.2887	0.3826	0.3403	0.9209	0.694
PTEN:130:01:ENST00000371953	78	UCEC	1	PTEN	130	ENST00000371953	63	194	0.2892	0.6276	0.3005	0.8594	0.5859
TP53:271:01:ENST00000269305	6	BLCA	1	TP53	271	ENST00000269305	4	177	0.2897	2.0355	0.2277	0.7143	0.3597
EGFR:222:01:ENST00000275493	6	GBM	1	EGFR	222	ENST00000275493	5	77	0.2924	1.7647	0.2277	0.81	0.3657
KMT2B:174:01:ENST00000420124	7	STAD	1	KMT2B	174	ENST00000420124	5	17	0.2927	0	0.9988	0.0757	0.0388
PFAS:618:01:ENST00000314666	4	UCEC	1	PFAS	618	ENST00000314666	4	12	0.2934	0	0.9994	0.9785	0.8356
NLRP4:358:06:ENST00000301295	5	SKCM	6	NLRP4	358	ENST00000301295	4	37	0.2952	1.7932	0.3157	0.3142	0.0382
TP53:282:01:ENST00000269305	5	OV	1	TP53	282	ENST00000269305	5	359	0.2964	2.4276	0.1303	0.8226	0.5629
ERBB2:755:01:ENST00000269571	7	BRCA	1	ERBB2	755	ENST00000269571	6	20	0.2968	NA	0.9991	0.9286	0.7044
PTEN:343:01:ENST00000371953	5	UCEC	1	PTEN	343	ENST00000371953	5	252	0.2975	0	0.9962	0.9183	0.6704
APC:213:01:ENST00000257430	6	READ	1	APC	213	ENST00000257430	6	96	0.2987	2.3083	0.2745	0.9869	0.8655
PIK3CA:542:01:ENST00000263967	4	LUAD	1	PIK3CA	542	ENST00000263967	4	20	0.2998	3.9994	0.1152	0.3098	0.187
ZNF609:734:01:ENST00000326648	9	UCEC	1	ZNF609	734	ENST00000326648	7	17	0.3003	3.4496	0.3813	0.7643	0.4673
PIK3CA:546:01:ENST00000263967	5	READ	1	PIK3CA	546	ENST00000263967	4	12	0.3022	NA	0.9995	0.9756	0.818
MGAM:1091:06:ENST00000549489	4	SKCM	6	MGAM	1091	ENST00000549489	4	94	0.3027	1.6414	0.3546	0.2089	0.0145
TP53:285:01:ENST00000269305	4	BRCA	1	TP53	285	ENST00000269305	4	319	0.3033	1.6378	0.4959	0.2242	0.0443
SPECC1:303:01:ENST00000261503	16	UCEC	1	SPECC1	303	ENST00000261503	15	11	0.3034	3.0562	0.3188	0.8831	0.6191
CELSR1:1849:01:ENST00000262738	4	UCEC	1	CELSR1	1849	ENST00000262738	4	28	0.3036	4.2164	0.2442	0.8982	0.6325
PTPRB:1560:06:ENST00000261266	5	SKCM	6	PTPRB	1560	ENST00000261266	4	50	0.3046	2.216	0.1949	0.8839	0.6468
TP53:213:01:ENST00000269305	4	ESCA	1	TP53	213	ENST00000269305	4	141	0.305	1.806	0.3213	0.6737	0.3169
FUBP1:83:01:ENST00000370768	5	LGG	1	FUBP1	83	ENST00000370768	5	38	0.3051	2.0849	0.4352	0.4006	0.1417
PIK3CA:545:01:ENST00000263967	35	BLCA	1	PIK3CA	545	ENST00000263967	28	47	0.3052	1.4116	0.3061	0.6967	0.3877
APC:1414:01:ENST00000257430	7	COAD	1	APC	1414	ENST00000257430	6	251	0.3062	0.4318	0.4057	0.5903	0.277
PLEKHA6:328:01:ENST00000272203	15	COAD	1	PLEKHA6	328	ENST00000272203	8	6	0.3064	1	NA	0.8632	0.591
CNTNAP2:362:06:ENST00000361727	8	SKCM	6	CNTNAP2	362	ENST00000361727	4	52	0.3064	0.3881	0.3533	0.7561	0.4833
BRAF:403:01:ENST00000288602	8	UCEC	1	BRAF	403	ENST00000288602	7	6	0.3077	0	0.9996	0.9606	0.7755
CLMN:865:01:ENST00000298912	4	UCEC	1	CLMN	865	ENST00000298912	4	23	0.308	4.5968	0.2161	0.5804	0.3395
PIK3CA:345:01:ENST00000263967	16	BRCA	1	PIK3CA	345	ENST00000263967	16	287	0.309	1.6139	0.3684	0.3252	0.1118
ATP6V1B1:386:01:ENST00000234396	7	UCEC	1	ATP6V1B1	386	ENST00000234396	6	12	0.3108	3.6275	0.297	0.997	0.9382
PARD3B:837:01:ENST00000406610	4	UCEC	1	PARD3B	837	ENST00000406610	4	18	0.3158	0	0.9993	0.9821	0.8481
COL21A1:701:06:ENST00000244728	5	SKCM	6	COL21A1	701	ENST00000244728	4	50	0.3166	0	0.998	0.1206	0.0817
GRIN2A:1322:06:ENST00000330684	5	SKCM	6	GRIN2A	1322	ENST00000330684	4	64	0.3175	0.4077	0.38	1	0.9996
ADNP2:324:01:ENST00000262198	5	UCEC	1	ADNP2	324	ENST00000262198	5	7	0.3182	0	0.9994	0.8336	0.5473
EGFR:598:01:ENST00000275493	14	GBM	1	EGFR	598	ENST00000275493	13	69	0.3188	0.7328	0.368	0.9966	0.9343
TMC5:276:06:ENST00000396229	7	SKCM	6	TMC5	276	ENST00000396229	5	35	0.3191	0.4019	0.3804	0.8128	0.5023
CPAMD8:568:06:ENST00000443236	6	SKCM	6	CPAMD8	568	ENST00000443236	4	37	0.3199	0.4055	0.3809	0.8919	0.6451
TP53:282:01:ENST00000269305	5	ESCA	1	TP53	282	ENST00000269305	4	141	0.3214	2.7707	0.1608	0.6507	0.404
TTN:3271:06:ENST00000591111	5	SKCM	6	TTN	3271	ENST00000591111	4	225	0.3216	0.4026	0.3654	0.7742	0.5047
TP53:213:01:ENST00000269305	11	COAD	1	TP53	213	ENST00000269305	10	185	0.3244	0.3882	0.3496	0.9134	0.6808
ITGB4:201:01:ENST00000200181	4	UCEC	1	ITGB4	201	ENST00000200181	4	15	0.3251	0	0.9989	0.7939	0.4895
PIK3R1:464:01:ENST00000521381	5	UCEC	1	PIK3R1	464	ENST00000521381	4	124	0.3265	2.1253	0.3042	0.4342	0.1484
R3HDM2:913:01:ENST00000347140	7	UCEC	1	R3HDM2	913	ENST00000347140	6	8	0.3297	NA	0.9994	0.4173	0.1764
FGFR3:373:01:ENST00000260795	8	BLCA	1	FGFR3	373	ENST00000260795	8	45	0.3298	0.3741	0.3415	0.9109	0.669
TP53:179:01:ENST00000269305	9	LGG	1	TP53	179	ENST00000269305	9	217	0.3302	3.1868	0.1192	0.3174	0.17
TP53:179:01:ENST00000269305	9	HNSC	1	TP53	179	ENST00000269305	8	308	0.3305	0.5041	0.3361	0.6506	0.3857
VPS13A:372:01:ENST00000360280	5	UCEC	1	VPS13A	372	ENST00000360280	4	25	0.3306	3.2717	0.334	0.7472	0.4726
RPS6KA6:110:01:ENST00000262752	5	UCEC	1	RPS6KA6	110	ENST00000262752	4	12	0.3308	4.3205	0.3147	0.9945	0.9168
MAGEE2:45:01:ENST00000373359	8	STAD	1	MAGEE2	45	ENST00000373359	4	5	0.3333	0.3361	0.3486	0.7351	0.4325
CCDC15:194:01:ENST00000344762	6	UCEC	1	CCDC15	194	ENST00000344762	6	4	0.3333	NA	0.9994	1	0.9926
EXOSC9:78:01:ENST00000243498	5	UCEC	1	EXOSC9	78	ENST00000243498	4	5	0.3333	NA	0.9996	0.9368	0.7207
THBS3:305:01:ENST00000368378	5	UCEC	1	THBS3	305	ENST00000368378	5	5	0.3333	0	0.9996	0.43	0.1973
TP53:163:01:ENST00000269305	9	OV	1	TP53	163	ENST00000269305	9	355	0.3338	1.7879	0.2004	0.4871	0.2805
FGFR2:382:01:ENST00000358487	6	UCEC	1	FGFR2	382	ENST00000358487	6	46	0.3339	0	0.9983	0.9996	0.977
TP53:193:01:ENST00000269305	5	LUAD	1	TP53	193	ENST00000269305	5	216	0.3345	0	0.9951	0.1704	0.1054
PTEN:27:01:ENST00000371953	5	UCEC	1	PTEN	27	ENST00000371953	4	253	0.3359	2.7005	0.3284	0.7495	0.4805
TP53:220:01:ENST00000269305	7	UCEC	1	TP53	220	ENST00000269305	7	167	0.3363	0.4188	0.3917	0.86	0.5706
ZDBF2:1063:06:ENST00000374423	5	SKCM	6	ZDBF2	1063	ENST00000374423	4	47	0.3367	0.4058	0.3785	0.7526	0.479
RUNX1:135:03:ENST00000344691	4	LAML	3	RUNX1	135	ENST00000344691	4	7	0.3394	2.095	0.3031	0.7515	0.3417
BRAF:600:01:ENST00000288602	280	THCA	1	BRAF	600	ENST00000288602	279	7	0.341	NA	0.9985	0.0146	0.017
SORL1:1581:01:ENST00000260197	9	STAD	1	SORL1	1581	ENST00000260197	4	9	0.3413	2.101	0.3695	0.9995	0.9748
TP53:176:01:ENST00000269305	5	COAD	1	TP53	176	ENST00000269305	5	190	0.3419	2.1995	0.2778	0.9382	0.7306
KRAS:12:01:ENST00000256078	18	STAD	1	KRAS	12	ENST00000256078	15	12	0.3419	0.4973	0.3248	0.7684	0.4737
TP53:192:01:ENST00000269305	4	BLCA	1	TP53	192	ENST00000269305	4	177	0.3457	0.4248	0.3949	0.9376	0.7286
VHL:114:01:ENST00000256474	7	KIRC	1	VHL	114	ENST00000256474	7	158	0.3462	1.7778	0.3385	0.9878	0.8751
SMC3:43:01:ENST00000361804	4	UCEC	1	SMC3	43	ENST00000361804	4	12	0.3462	4.1833	0.3274	0.8701	0.6089
CARD11:555:01:ENST00000396946	6	UCEC	1	CARD11	555	ENST00000396946	4	19	0.3487	2.688	0.4216	0.1798	0.1095
CDK4:24:06:ENST00000257904	4	SKCM	6	CDK4	24	ENST00000257904	4	5	0.3492	2.2902	0.3678	0.3527	0.0765
PIK3CA:726:01:ENST00000263967	10	BRCA	1	PIK3CA	726	ENST00000263967	9	294	0.3502	0	0.9973	0.7149	0.4336
TP53:175:01:ENST00000269305	8	LGG	1	TP53	175	ENST00000269305	7	219	0.3502	0	0.9971	0.7792	0.5002
GLI1:274:01:ENST00000228682	7	COAD	1	GLI1	274	ENST00000228682	5	6	0.3506	0	0.9994	0.9611	0.7788
TP53:283:01:ENST00000269305	4	HNSC	1	TP53	283	ENST00000269305	4	312	0.3514	0.4288	0.3988	0.9941	0.916
RIF1:1505:01:ENST00000243326	9	STAD	1	RIF1	1505	ENST00000243326	4	8	0.3515	0.3751	0.3859	0.881	0.6101
HRAS:13:01:ENST00000311189	11	HNSC	1	HRAS	13	ENST00000311189	10	17	0.3519	2.0072	0.3269	0.452	0.2268
KLHL14:232:01:ENST00000359358	6	STAD	1	KLHL14	232	ENST00000359358	4	6	0.3524	2.5906	0.3428	0.5858	0.3106
PTEN:233:01:ENST00000371953	26	UCEC	1	PTEN	233	ENST00000371953	24	233	0.3529	0.5303	0.3844	0.9124	0.6642
CAMSAP2:1437:01:ENST00000236925	14	UCEC	1	CAMSAP2	1437	ENST00000236925	13	14	0.3538	0.4373	0.5005	0.3191	0.1344
FBXW7:582:01:ENST00000281708	4	COAD	1	FBXW7	582	ENST00000281708	4	41	0.3556	3.2835	0.2916	0.7856	0.5139
TP53:187:01:ENST00000269305	4	ESCA	1	TP53	187	ENST00000269305	4	141	0.3564	0.4463	0.425	0.9983	0.9558
FLT3:835:03:ENST00000241453	10	LAML	3	FLT3	835	ENST00000241453	9	5	0.3566	0.5173	0.354	0.9969	0.9367
KRAS:13:01:ENST00000256078	8	READ	1	KRAS	13	ENST00000256078	7	41	0.357	1.9705	0.4335	0.97	0.8061
TP53:220:01:ENST00000269305	10	BRCA	1	TP53	220	ENST00000269305	10	313	0.3573	0.5951	0.4834	0.1861	0.046
PPP2R1A:179:01:ENST00000322088	5	UCS	1	PPP2R1A	179	ENST00000322088	5	10	0.3576	1.9254	0.3617	0.8732	0.5878
PPP6C:264:06:ENST00000373547	8	SKCM	6	PPP6C	264	ENST00000373547	7	13	0.3603	0.4952	0.3947	0.9321	0.7056
MAGEC1:620:06:ENST00000285879	7	SKCM	6	MAGEC1	620	ENST00000285879	4	52	0.3609	1.8316	0.3314	0.8493	0.5375
BCOR:1459:01:ENST00000378444	24	UCEC	1	BCOR	1459	ENST00000378444	21	23	0.3617	2.2643	0.3463	0.7072	0.4078
KANSL1:204:01:ENST00000574590	6	UCEC	1	KANSL1	204	ENST00000574590	6	34	0.3635	0	0.999	0.7657	0.4819
SMAD2:464:01:ENST00000262160	5	COAD	1	SMAD2	464	ENST00000262160	4	9	0.3636	2.1138	0.3422	0.9141	0.6607
FBXW7:465:01:ENST00000281708	7	UCS	1	FBXW7	465	ENST00000281708	7	14	0.3638	1.7684	0.322	0.3376	0.1844
TP53:154:01:ENST00000269305	7	LUSC	1	TP53	154	ENST00000269305	7	360	0.3662	0.5577	0.4125	0.9855	0.8644
FGFR3:249:01:ENST00000260795	30	BLCA	1	FGFR3	249	ENST00000260795	29	24	0.3689	0.6314	0.3648	0.9427	0.7314
SNCAIP:348:06:ENST00000261368	5	SKCM	6	SNCAIP	348	ENST00000261368	4	43	0.3693	0.4055	0.3807	0.9478	0.7492
TP53:278:01:ENST00000269305	5	BRCA	1	TP53	278	ENST00000269305	4	319	0.3696	0	0.9964	0.9753	0.8274
TP53:273:01:ENST00000269305	4	UCS	1	TP53	273	ENST00000269305	4	45	0.3698	0	0.9969	0	0.0001
ZNF416:232:01:ENST00000196489	4	COAD	1	ZNF416	232	ENST00000196489	4	4	0.3714	0.366	0.3853	0.7351	0.4325
TP53:126:01:ENST00000269305	7	BRCA	1	TP53	126	ENST00000269305	7	316	0.3715	2.011	0.3365	1	0.989
ELMSAN1:314:01:ENST00000286523	18	UCEC	1	ELMSAN1	314	ENST00000286523	17	12	0.3715	2.5238	0.4233	0.626	0.3309
ASH1L:1222:01:ENST00000368346	4	COAD	1	ASH1L	1222	ENST00000368346	4	17	0.3739	2.416	0.4718	0.5246	0.297
FBXW7:465:01:ENST00000281708	11	STAD	1	FBXW7	465	ENST00000281708	5	10	0.3743	0.3849	0.3957	0.9578	0.7702
APC:1408:01:ENST00000257430	6	COAD	1	APC	1408	ENST00000257430	4	253	0.3747	1.9309	0.3635	0.5271	0.2086
PIK3CA:1047:01:ENST00000263967	8	BLCA	1	PIK3CA	1047	ENST00000263967	7	68	0.3752	0.6254	0.4387	0.9266	0.6889
QKI:134:01:ENST00000361752	7	UCEC	1	QKI	134	ENST00000361752	7	4	0.3758	0.2743	0.2918	0.9079	0.6672
NRAS:61:01:ENST00000369535	7	COAD	1	NRAS	61	ENST00000369535	6	9	0.3764	2.95	0.3774	0.5559	0.2944
CNTN6:418:01:ENST00000350110	11	UCEC	1	CNTN6	418	ENST00000350110	8	18	0.3764	3.5926	0.2975	0.9023	0.6547
UBR5:2121:01:ENST00000520539	5	UCEC	1	UBR5	2121	ENST00000520539	5	26	0.377	2.9319	0.3831	0.7235	0.403
AREG:134:06:ENST00000395748	4	SKCM	6	AREG	134	ENST00000395748	4	14	0.3771	2.0188	0.3233	0.9953	0.922
ANGPT1:275:06:ENST00000517746	4	SKCM	6	ANGPT1	275	ENST00000517746	4	26	0.3775	2.681	0.2171	0.1567	0.1189
RXRA:427:01:ENST00000481739	14	BLCA	1	RXRA	427	ENST00000481739	13	8	0.378	0.594	0.3921	0.5503	0.2558
TTK:192:01:ENST00000369798	5	UCEC	1	TTK	192	ENST00000369798	5	18	0.3783	0	0.9991	0.9186	0.6855
PIK3R1:567:01:ENST00000521381	4	UCEC	1	PIK3R1	567	ENST00000521381	4	124	0.3791	0	0.9974	0.781	0.5028
TP53:245:01:ENST00000269305	14	LUSC	1	TP53	245	ENST00000269305	14	353	0.3797	0.6942	0.4223	0.9848	0.8589
TP53:282:01:ENST00000269305	6	STAD	1	TP53	282	ENST00000269305	5	171	0.3799	1.7225	0.3585	0.8766	0.5875
SSPO:2656:06:ENST00000378016	6	SKCM	6	SSPO	2656	ENST00000378016	4	36	0.3812	0.5784	0.4643	0.5251	0.2041
WWC2:206:01:ENST00000403733	6	UCEC	1	WWC2	206	ENST00000403733	5	14	0.3824	0	0.9995	0.2173	0.1117
TP53:282:01:ENST00000269305	11	COAD	1	TP53	282	ENST00000269305	11	184	0.3855	1.8862	0.2931	0.023	0.0203
PIK3CA:1047:01:ENST00000263967	41	UCEC	1	PIK3CA	1047	ENST00000263967	41	169	0.3865	0.6267	0.3835	0.9291	0.7042
OR51S1:194:06:ENST00000322101	7	SKCM	6	OR51S1	194	ENST00000322101	4	20	0.3892	1.7939	0.3903	0.7878	0.4579
INPPL1:1156:01:ENST00000298229	15	UCEC	1	INPPL1	1156	ENST00000298229	15	32	0.3896	0.5274	0.425	0.822	0.5363
TRIM49C:327:01:ENST00000448984	8	STAD	1	TRIM49C	327	ENST00000448984	8	5	0.3901	1.8707	0.4733	0.7424	0.4355
TP53:158:01:ENST00000269305	4	LGG	1	TP53	158	ENST00000269305	4	222	0.3904	4.1028	0.1743	0.6305	0.3829
TP53:193:01:ENST00000269305	4	UCEC	1	TP53	193	ENST00000269305	4	170	0.3905	0.5076	0.5035	0.6624	0.3286
PIK3CA:545:01:ENST00000263967	11	STAD	1	PIK3CA	545	ENST00000263967	9	35	0.391	0.5247	0.3947	0.7606	0.4722
TEX15:511:06:ENST00000256246	7	SKCM	6	TEX15	511	ENST00000256246	4	28	0.3912	1.8203	0.3602	0.9891	0.8801
TTN:31139:01:ENST00000591111	10	UCEC	1	TTN	31139	ENST00000591111	4	175	0.3912	0	0.9978	0.9034	0.6652
NFE2L2:34:01:ENST00000397062	6	BLCA	1	NFE2L2	34	ENST00000397062	6	19	0.3915	1.7151	0.372	0.1876	0.0434
TP53:248:01:ENST00000269305	8	BRCA	1	TP53	248	ENST00000269305	8	315	0.3927	1.9884	0.3423	0.9148	0.6797
NLRP13:416:06:ENST00000342929	6	SKCM	6	NLRP13	416	ENST00000342929	4	34	0.393	2.2579	0.2901	0.5787	0.3553
PTEN:157:01:ENST00000371953	4	UCEC	1	PTEN	157	ENST00000371953	4	253	0.3968	2.4132	0.3866	0.9181	0.6689
APC:302:01:ENST00000257430	5	COAD	1	APC	302	ENST00000257430	5	252	0.3976	1.9796	0.3433	0.9962	0.931
VPS13A:2885:01:ENST00000360280	5	UCEC	1	VPS13A	2885	ENST00000360280	5	24	0.398	2.6224	0.4313	0.5211	0.2892
RHOB:75:01:ENST00000272233	6	BLCA	1	RHOB	75	ENST00000272233	6	16	0.3992	1.6189	0.43	0.5261	0.2191
CLMN:842:01:ENST00000298912	4	UCEC	1	CLMN	842	ENST00000298912	4	23	0.3998	0	0.9991	0.6859	0.3617
PRKDC:2704:01:ENST00000314191	4	UCEC	1	PRKDC	2704	ENST00000314191	4	43	0.3999	2.5571	0.3933	0.4559	0.1666
SEZ6:306:01:ENST00000317338	4	UCEC	1	SEZ6	306	ENST00000317338	4	8	0.4	0	0.9994	0.9984	0.9554
RGS12:1292:01:ENST00000336727	6	UCEC	1	RGS12	1292	ENST00000336727	4	17	0.401	0	0.9991	0.9998	0.986
TP53:163:01:ENST00000269305	7	HNSC	1	TP53	163	ENST00000269305	7	309	0.402	0.6527	0.4649	0.8798	0.602
E2F1:435:01:ENST00000343380	5	UCEC	1	E2F1	435	ENST00000343380	5	8	0.4025	NA	0.9996	0.627	0.3464
TP53:278:01:ENST00000269305	6	OV	1	TP53	278	ENST00000269305	6	358	0.4032	0.6608	0.4767	0.9878	0.8733
CAMTA2:866:01:ENST00000348066	9	UCEC	1	CAMTA2	866	ENST00000348066	8	17	0.4042	0	0.9991	0.204	0.0893
CARD10:527:01:ENST00000251973	5	UCEC	1	CARD10	527	ENST00000251973	5	5	0.4048	NA	0.9995	0.8625	0.5867
CTNNB1:335:01:ENST00000349496	5	LIHC	1	CTNNB1	335	ENST00000349496	4	78	0.4058	1.9781	0.3596	0.9917	0.8957
CDKN2A:51:01:ENST00000304494	4	HNSC	1	CDKN2A	51	ENST00000304494	4	87	0.4074	2.6991	0.1776	0.0011	0.0199
GABRE:298:06:ENST00000370328	6	SKCM	6	GABRE	298	ENST00000370328	5	18	0.4082	1.6591	0.4018	0.9765	0.8231
PIK3CA:545:01:ENST00000263967	17	LUSC	1	PIK3CA	545	ENST00000263967	15	37	0.4088	0.7067	0.442	0.5239	0.2415
BEND3:265:01:ENST00000369042	8	UCEC	1	BEND3	265	ENST00000369042	7	5	0.4091	NA	0.9994	0.8974	0.6393
HRAS:61:01:ENST00000311189	6	BLCA	1	HRAS	61	ENST00000311189	6	11	0.4101	0.5209	0.428	0.5914	0.3138
PRAMEF18:159:06:ENST00000624297	7	SKCM	6	PRAMEF18	159	ENST00000624297	4	16	0.4107	2.3673	0.3047	0.4746	0.2746
VHL:155:01:ENST00000256474	10	KIRC	1	VHL	155	ENST00000256474	10	155	0.4111	1.806	0.3251	0.4024	0.2155
KANSL1L:986:01:ENST00000281772	7	UCEC	1	KANSL1L	986	ENST00000281772	6	10	0.4116	2.31	0.4064	0.7221	0.4343
NIPBL:2776:01:ENST00000282516	11	UCEC	1	NIPBL	2776	ENST00000282516	10	33	0.4116	2.2347	0.3787	0.7455	0.4325
RNF43:659:01:ENST00000407977	39	UCEC	1	RNF43	659	ENST00000407977	34	23	0.4144	0.571	0.4042	0.3888	0.1654
EGFR:774:01:ENST00000275493	4	GBM	1	EGFR	774	ENST00000275493	4	78	0.4146	2.0924	0.2182	0.2303	0.2061
PIK3CA:542:01:ENST00000263967	13	COAD	1	PIK3CA	542	ENST00000263967	10	79	0.4153	0.4713	0.4666	0.9714	0.8151
TTN:11301:01:ENST00000591111	4	UCEC	1	TTN	11301	ENST00000591111	4	175	0.4153	0	0.9978	0.9739	0.8138
RB1:654:01:ENST00000267163	4	GBM	1	RB1	654	ENST00000267163	4	29	0.4155	0.6445	0.4925	0.5095	0.1167
CPS1:1305:01:ENST00000233072	4	UCEC	1	CPS1	1305	ENST00000233072	4	13	0.416	0	0.9992	0.49	0.2135
RP1L1:284:01:ENST00000382483	5	UCEC	1	RP1L1	284	ENST00000382483	4	19	0.4167	0	0.9993	0.9762	0.8245
PCDH15:764:06:ENST00000320301	5	SKCM	6	PCDH15	764	ENST00000320301	4	71	0.4184	0.4559	0.4431	0.9634	0.7895
KNTC1:1646:01:ENST00000333479	7	UCEC	1	KNTC1	1646	ENST00000333479	7	18	0.4185	0	0.999	0.1341	0.063
TP53:248:01:ENST00000269305	16	UCEC	1	TP53	248	ENST00000269305	15	159	0.419	0.5394	0.3953	0.6321	0.357
TCF4:647:01:ENST00000356073	4	UCEC	1	TCF4	647	ENST00000356073	4	10	0.4196	0	0.9996	0.4047	0.1557
CDKN2A:110:01:ENST00000304494	9	HNSC	1	CDKN2A	110	ENST00000304494	8	83	0.42	1.4976	0.3974	0.9846	0.8581
ZNF98:58:01:ENST00000357774	4	STAD	1	ZNF98	58	ENST00000357774	4	8	0.4202	2.31	0.4064	0.9914	0.8962
SEC31A:462:01:ENST00000355196	13	UCEC	1	SEC31A	462	ENST00000355196	8	14	0.4221	2.2397	0.4263	0.5035	0.2552
ACSM5:283:01:ENST00000331849	4	UCEC	1	ACSM5	283	ENST00000331849	4	7	0.4242	0	0.9996	0.3181	0.1227
PLEKHA7:802:01:ENST00000355661	6	UCEC	1	PLEKHA7	802	ENST00000355661	6	6	0.4242	NA	0.9996	0.2149	0.0893
RBM15B:844:01:ENST00000563281	5	UCEC	1	RBM15B	844	ENST00000563281	4	7	0.4242	0	0.9994	0.7798	0.4896
EP300:1399:01:ENST00000263253	4	CESC	1	EP300	1399	ENST00000263253	4	24	0.4244	0.4782	0.4846	0.7159	0.386
TP53:175:01:ENST00000269305	9	UCEC	1	TP53	175	ENST00000269305	8	166	0.4273	1.6387	0.4097	0.9926	0.9043
TP53:282:01:ENST00000269305	7	LGG	1	TP53	282	ENST00000269305	7	219	0.4275	1.5146	0.4875	0.6158	0.2912
MSH3:383:01:ENST00000265081	14	UCEC	1	MSH3	383	ENST00000265081	13	5	0.4283	0.2462	0.3308	0.6046	0.3375
PIK3CA:546:01:ENST00000263967	11	BRCA	1	PIK3CA	546	ENST00000263967	11	292	0.4285	0.4846	0.4821	0.7252	0.4042
RBM39:353:01:ENST00000253363	6	UCEC	1	RBM39	353	ENST00000253363	6	5	0.4286	0.342	0.3851	0.657	0.3494
PAX2:403:01:ENST00000428433	7	UCEC	1	PAX2	403	ENST00000428433	7	7	0.4295	1	NA	0.9999	0.9914
PTEN:323:01:ENST00000371953	13	UCEC	1	PTEN	323	ENST00000371953	11	246	0.4324	0.4959	0.4904	0.3304	0.1127
SPEG:2233:01:ENST00000312358	4	UCEC	1	SPEG	2233	ENST00000312358	4	27	0.4338	0	0.9995	0.4842	0.2026
CDH6:722:06:ENST00000265071	5	SKCM	6	CDH6	722	ENST00000265071	4	39	0.4343	1.6854	0.4099	0.803	0.473
PCDH19:364:01:ENST00000373034	8	UCEC	1	PCDH19	364	ENST00000373034	5	22	0.4358	4.1633	0.3133	0.829	0.5557
KRAS:13:01:ENST00000256078	32	COAD	1	KRAS	13	ENST00000256078	29	116	0.436	1.3774	0.4314	0.997	0.9399
ARAF:255:01:ENST00000377045	4	UCEC	1	ARAF	255	ENST00000377045	4	12	0.4385	0	0.9996	0.9845	0.8494
VHL:117:01:ENST00000256474	5	KIRC	1	VHL	117	ENST00000256474	5	160	0.4397	1.8306	0.4056	0.9949	0.9211
OR51B2:163:06:ENST00000328813	7	SKCM	6	OR51B2	163	ENST00000328813	5	8	0.4398	2.4495	0.3728	0.6862	0.4028
HPS1:325:01:ENST00000325103	7	UCEC	1	HPS1	325	ENST00000325103	7	7	0.4406	NA	0.9994	0.4637	0.2153
NSD1:1531:01:ENST00000439151	14	UCEC	1	NSD1	1531	ENST00000439151	13	39	0.4413	0.4243	0.4169	0.512	0.2637
PRRC2C:1654:01:ENST00000338920	5	UCEC	1	PRRC2C	1654	ENST00000338920	4	23	0.4417	0	0.9993	0.7816	0.468
ARID4B:939:01:ENST00000264183	9	UCEC	1	ARID4B	939	ENST00000264183	8	20	0.4421	0.5337	0.4489	0.2253	0.0765
TP53:282:01:ENST00000269305	6	GBM	1	TP53	282	ENST00000269305	6	100	0.4422	1.4946	0.3881	0.8824	0.5916
TP53:179:01:ENST00000269305	4	GBM	1	TP53	179	ENST00000269305	4	102	0.4434	0.7042	0.554	0.7998	0.4654
CTNNB1:32:01:ENST00000349496	16	UCEC	1	CTNNB1	32	ENST00000349496	14	83	0.4453	0.4769	0.4787	0.8238	0.543
PSG4:263:06:ENST00000405312	4	SKCM	6	PSG4	263	ENST00000405312	4	20	0.4474	1.6478	0.4627	0.8287	0.5123
PTEN:290:01:ENST00000371953	6	UCEC	1	PTEN	290	ENST00000371953	6	251	0.4503	0	0.9962	0.9126	0.6779
PTCH1:1203:01:ENST00000331920	8	UCEC	1	PTCH1	1203	ENST00000331920	7	17	0.452	0	0.9996	0.1874	0.0551
MUC4:3516:01:ENST00000463781	7	UCEC	1	MUC4	3516	ENST00000463781	6	45	0.4527	0.5039	0.5142	0.6372	0.3196
CNTN5:379:06:ENST00000524871	7	SKCM	6	CNTN5	379	ENST00000524871	5	53	0.4528	0.6104	0.5012	0.9867	0.8719
ATRX:1302:01:ENST00000373344	4	LGG	1	ATRX	1302	ENST00000373344	4	161	0.454	3.3083	0.2462	0.6789	0.4211
MYO16:842:01:ENST00000356711	5	UCEC	1	MYO16	842	ENST00000356711	5	25	0.454	2.6841	0.4303	0.6681	0.3955
APC:232:01:ENST00000257430	7	COAD	1	APC	232	ENST00000257430	5	252	0.4545	0	0.9959	0.2296	0.1363
GLTSCR1:937:01:ENST00000396720	8	UCEC	1	GLTSCR1	937	ENST00000396720	5	6	0.4545	NA	0.9996	0.9377	0.7172
CCND1:291:01:ENST00000227507	5	UCEC	1	CCND1	291	ENST00000227507	5	22	0.4571	2.7118	0.4156	0.7101	0.4337
DNAH5:3236:06:ENST00000265104	8	SKCM	6	DNAH5	3236	ENST00000265104	6	150	0.4591	1.4982	0.4337	0.926	0.6828
TP53:225:01:ENST00000269305	4	LUSC	1	TP53	225	ENST00000269305	4	363	0.4598	0.5063	0.4977	0.9518	0.7611
SPTA1:1732:01:ENST00000368147	6	STAD	1	SPTA1	1732	ENST00000368147	5	53	0.4598	1.7457	0.4614	0.7895	0.5194
TP53:342:01:ENST00000269305	10	BRCA	1	TP53	342	ENST00000269305	9	314	0.4602	0	0.9959	0.2201	0.1165
CEP290:212:01:ENST00000552810	10	STAD	1	CEP290	212	ENST00000552810	4	9	0.4615	0.4512	0.4781	0.9447	0.737
PIK3CA:453:01:ENST00000263967	7	BRCA	1	PIK3CA	453	ENST00000263967	5	298	0.4619	2.3461	0.403	0.9074	0.6702
WDR5:217:01:ENST00000358625	16	UCEC	1	WDR5	217	ENST00000358625	13	4	0.463	0.4396	0.5038	0.9811	0.8436
ZEB2:1094:01:ENST00000409487	4	BLCA	1	ZEB2	1094	ENST00000409487	4	10	0.4635	0.4755	0.5114	0.9982	0.9528
SLC27A5:554:06:ENST00000263093	9	SKCM	6	SLC27A5	554	ENST00000263093	8	4	0.4646	0.4418	0.3746	0.5395	0.299
C2orf42:410:01:ENST00000264434	5	UCEC	1	C2orf42	410	ENST00000264434	4	8	0.4646	0	0.9996	0.4046	0.1726
PMS2:414:01:ENST00000265849	6	UCEC	1	PMS2	414	ENST00000265849	6	8	0.4655	1.9322	0.6429	0.2829	0.1282
TP53:213:01:ENST00000269305	4	SARC	1	TP53	213	ENST00000269305	4	78	0.4661	0.5051	0.5023	0.9898	0.8874
TP53:196:01:ENST00000269305	9	HNSC	1	TP53	196	ENST00000269305	8	308	0.4674	0.6712	0.4944	0.9817	0.8513
APC:943:01:ENST00000257430	4	COAD	1	APC	943	ENST00000257430	4	253	0.4677	1.4676	0.595	0.4871	0.1783
TP53:266:01:ENST00000269305	4	COAD	1	TP53	266	ENST00000269305	4	191	0.4679	0	0.9961	0.4937	0.28
RABGAP1:930:01:ENST00000373647	6	UCEC	1	RABGAP1	930	ENST00000373647	4	8	0.4687	0	0.9996	0.5956	0.3296
NBPF12:125:01:ENST00000617931	7	BRCA	1	NBPF12	125	ENST00000617931	7	12	0.469	3.1303	0.3521	0.4013	0.1636
TP53:331:01:ENST00000269305	6	BRCA	1	TP53	331	ENST00000269305	5	318	0.4698	0.5571	0.5734	0.6187	0.2929
SF3B1:625:01:ENST00000335508	14	UVM	1	SF3B1	625	ENST00000335508	13	4	0.4706	0	0.9995	0.7366	0.4095
FRYL:330:01:ENST00000358350	6	UCEC	1	FRYL	330	ENST00000358350	5	21	0.4714	0	0.9993	0.7801	0.4963
TP53:192:01:ENST00000269305	6	OV	1	TP53	192	ENST00000269305	5	359	0.4733	0.4616	0.4407	0.1505	0.1009
FBXW7:479:01:ENST00000281708	6	UCEC	1	FBXW7	479	ENST00000281708	6	63	0.4745	0	0.9984	0.9138	0.6795
EIF4G3:564:01:ENST00000264211	4	UCEC	1	EIF4G3	564	ENST00000264211	4	20	0.4754	2.6026	0.4358	0.4431	0.2496
SLC12A7:686:01:ENST00000264930	6	COAD	1	SLC12A7	686	ENST00000264930	4	6	0.4762	0	0.9996	0.0698	0.0203
TP53:281:01:ENST00000269305	4	OV	1	TP53	281	ENST00000269305	4	360	0.4811	0.4955	0.4838	0.3274	0.2006
KIAA1024:702:01:ENST00000305428	14	UCEC	1	KIAA1024	702	ENST00000305428	10	4	0.4815	NA	0.9995	0.9795	0.8371
TP53:307:01:ENST00000269305	4	OV	1	TP53	307	ENST00000269305	4	360	0.4818	1.4017	0.5043	0.4086	0.0594
CLCN2:381:01:ENST00000265593	5	UCEC	1	CLCN2	381	ENST00000265593	5	9	0.4835	0	0.9995	0.9185	0.6779
TP53:175:01:ENST00000269305	8	LUSC	1	TP53	175	ENST00000269305	8	359	0.4838	1.5019	0.4242	0.9555	0.7668
CSMD3:258:06:ENST00000297405	5	SKCM	6	CSMD3	258	ENST00000297405	4	82	0.4841	1.975	0.3547	0.5263	0.3231
DNMT3A:882:03:ENST00000264709	10	LAML	3	DNMT3A	882	ENST00000264709	9	7	0.485	1.6626	0.4623	0.7679	0.4691
SMAD4:361:01:ENST00000342988	11	COAD	1	SMAD4	361	ENST00000342988	9	30	0.4857	1.5079	0.5039	0.9737	0.8123
ISM1:194:01:ENST00000262487	4	UCEC	1	ISM1	194	ENST00000262487	4	4	0.4857	0	0.9996	0.909	0.6645
STK11:53:01:ENST00000326873	6	LUAD	1	STK11	53	ENST00000326873	6	72	0.4905	1.6405	0.4193	0.8456	0.5825
TP53:158:01:ENST00000269305	4	GBM	1	TP53	158	ENST00000269305	4	102	0.4914	0.7737	0.6246	0.323	0.0377
TP53:193:01:ENST00000269305	8	LUSC	1	TP53	193	ENST00000269305	7	360	0.4915	0.4566	0.435	0.1029	0.0682
JAK1:860:01:ENST00000342505	41	UCEC	1	JAK1	860	ENST00000342505	41	18	0.4931	1.6783	0.5266	0.7332	0.4251
BRINP3:618:06:ENST00000367462	4	SKCM	6	BRINP3	618	ENST00000367462	4	34	0.4935	2.1867	0.3026	0.3949	0.2433
ASXL3:453:06:ENST00000269197	4	SKCM	6	ASXL3	453	ENST00000269197	4	69	0.4951	1.6171	0.4254	0.9359	0.7016
ADAMTS1:931:01:ENST00000284984	5	UCEC	1	ADAMTS1	931	ENST00000284984	4	7	0.497	0	0.9996	0.9737	0.8161
PIK3R1:457:01:ENST00000521381	5	UCEC	1	PIK3R1	457	ENST00000521381	5	123	0.4994	0	0.9976	0.194	0.1153
TP53:280:01:ENST00000269305	5	BRCA	1	TP53	280	ENST00000269305	5	318	0.501	2.1861	0.4403	0.6355	0.3808
CWF19L2:96:01:ENST00000282251	5	UCEC	1	CWF19L2	96	ENST00000282251	4	19	0.501	2.6904	0.4226	0.8993	0.6601
CSMD3:334:06:ENST00000297405	4	SKCM	6	CSMD3	334	ENST00000297405	4	82	0.5015	0.5144	0.5136	0.7629	0.4915
USP26:348:01:ENST00000370832	8	UCEC	1	USP26	348	ENST00000370832	6	21	0.5031	0	0.9991	0.5216	0.2797
MDGA2:334:01:ENST00000399232	8	STAD	1	MDGA2	334	ENST00000399232	4	9	0.5035	0.4298	0.4417	0.7807	0.4898
TP53:213:01:ENST00000269305	5	LGG	1	TP53	213	ENST00000269305	5	221	0.5039	2.9057	0.2969	0.3789	0.2175
NFASC:165:01:ENST00000339876	12	STAD	1	NFASC	165	ENST00000339876	4	14	0.5046	2.0278	0.4394	0.9425	0.7369
CTNNB1:33:01:ENST00000349496	27	UCEC	1	CTNNB1	33	ENST00000349496	26	71	0.5046	0.5725	0.4718	0.6954	0.4004
TP53:331:01:ENST00000269305	7	OV	1	TP53	331	ENST00000269305	7	357	0.5058	1.8748	0.2824	0.1399	0.0975
CIC:201:01:ENST00000575354	4	LGG	1	CIC	201	ENST00000575354	4	94	0.5087	0.9266	0.9493	0.8125	0.5002
LDLRAP1:202:01:ENST00000374338	9	UCEC	1	LDLRAP1	202	ENST00000374338	8	4	0.5091	NA	0.9994	0.2954	0.111
CIC:202:01:ENST00000575354	5	LGG	1	CIC	202	ENST00000575354	4	94	0.5153	0.9149	0.9404	0.1605	0.0307
FHOD3:336:01:ENST00000359247	14	STAD	1	FHOD3	336	ENST00000359247	4	13	0.5168	1.7346	0.5884	0.4974	0.2105
SBF1:1077:01:ENST00000380817	4	UCEC	1	SBF1	1077	ENST00000380817	4	12	0.5176	3.4641	0.3809	0.6771	0.3514
ZBTB20:692:01:ENST00000474710	20	UCEC	1	ZBTB20	692	ENST00000474710	18	8	0.5181	0.6194	0.6966	0.5235	0.2757
CTNNB1:37:01:ENST00000349496	5	LUAD	1	CTNNB1	37	ENST00000349496	4	13	0.5185	4.2426	0.3141	0.6844	0.4111
FUBP3:395:01:ENST00000319725	5	UCEC	1	FUBP3	395	ENST00000319725	5	6	0.5195	0.5358	0.5404	0.3167	0.1202
RPL22:89:01:ENST00000234875	5	UCEC	1	RPL22	89	ENST00000234875	4	42	0.5211	0	0.9988	0.8181	0.5453
CNGA4:510:01:ENST00000379936	4	STAD	1	CNGA4	510	ENST00000379936	4	7	0.5212	2.0759	0.4763	0.6374	0.3654
KCNH4:215:01:ENST00000264661	5	UCEC	1	KCNH4	215	ENST00000264661	5	10	0.5215	0	0.9995	0.9884	0.8782
SOS1:233:01:ENST00000402219	7	UCEC	1	SOS1	233	ENST00000402219	6	17	0.5217	NA	0.9995	0.9686	0.8029
PIK3CA:1047:01:ENST00000263967	15	HNSC	1	PIK3CA	1047	ENST00000263967	14	66	0.522	0.7266	0.507	0.1518	0.074
PPP2R3B:389:01:ENST00000390665	5	UCEC	1	PPP2R3B	389	ENST00000390665	5	11	0.522	2.4152	0.533	0.6899	0.4027
ROBO1:755:01:ENST00000464233	5	UCEC	1	ROBO1	755	ENST00000464233	4	22	0.5223	3.3993	0.3904	0.9779	0.8216
PROS1:316:06:ENST00000394236	6	SKCM	6	PROS1	316	ENST00000394236	5	12	0.5226	1.5221	0.5359	0.1231	0.0105
CD93:121:01:ENST00000246006	7	UCEC	1	CD93	121	ENST00000246006	7	15	0.5235	0	0.9995	0.9833	0.8514
USP13:118:01:ENST00000263966	4	UCEC	1	USP13	118	ENST00000263966	4	10	0.5235	NA	NA	0.1267	0.0691
DNAH7:1257:01:ENST00000312428	5	UCEC	1	DNAH7	1257	ENST00000312428	5	56	0.5244	0	0.9986	0.8608	0.5993
XPOT:126:01:ENST00000332707	6	UCEC	1	XPOT	126	ENST00000332707	6	7	0.5256	0.3782	0.4398	0.0492	0.0141
KRAS:12:01:ENST00000256078	102	COAD	1	KRAS	12	ENST00000256078	94	51	0.5259	0.7967	0.5251	0.9668	0.7939
SMAD4:537:01:ENST00000342988	5	READ	1	SMAD4	537	ENST00000342988	5	16	0.5262	2.4169	0.4546	0.1594	0.0904
XIRP2:2264:06:ENST00000628543	6	SKCM	6	XIRP2	2264	ENST00000628543	6	84	0.5263	1.4102	0.5153	0.9349	0.7035
PTEN:245:01:ENST00000371953	4	LUSC	1	PTEN	245	ENST00000371953	4	45	0.5266	0.53	0.5374	0.8303	0.5621
TP53:244:01:ENST00000269305	7	LUSC	1	TP53	244	ENST00000269305	6	361	0.527	1.537	0.4635	0.8768	0.6266
CNBD1:396:01:ENST00000518476	10	STAD	1	CNBD1	396	ENST00000518476	9	5	0.5275	1.5812	0.5446	0.4627	0.1964
NRIP1:729:01:ENST00000318948	7	STAD	1	NRIP1	729	ENST00000318948	4	8	0.5293	1.7239	0.5055	0.2634	0.0391
NFRKB:311:01:ENST00000446488	11	UCEC	1	NFRKB	311	ENST00000446488	8	9	0.5294	0	0.9996	0.5468	0.2713
COL21A1:695:06:ENST00000244728	5	SKCM	6	COL21A1	695	ENST00000244728	5	49	0.5301	0.7312	0.6178	0.7156	0.3816
TP53:245:01:ENST00000269305	8	OV	1	TP53	245	ENST00000269305	8	356	0.5302	0.7006	0.541	0.6138	0.3597
GRIN3A:364:06:ENST00000361820	4	SKCM	6	GRIN3A	364	ENST00000361820	4	27	0.5313	0.6643	0.5889	0.7558	0.4186
ACVR1:206:01:ENST00000263640	4	UCEC	1	ACVR1	206	ENST00000263640	4	16	0.5325	0	0.9996	0.9162	0.6703
EGFR:252:01:ENST00000275493	5	LGG	1	EGFR	252	ENST00000275493	5	25	0.5327	1.4486	0.5196	0.7594	0.4225
CCDC108:1165:01:ENST00000341552	6	UCEC	1	CCDC108	1165	ENST00000341552	6	23	0.5332	1.4037	0.7708	0.0786	0.0485
IGHV1OR21-1:82:01:ENST00000622028	4	STAD	1	IGHV1OR21-1	82	ENST00000622028	4	6	0.5333	2.1583	0.5304	0.5805	0.2947
WDR47:81:01:ENST00000369962	10	STAD	1	WDR47	81	ENST00000369962	6	4	0.5333	0.5087	0.5027	0.7898	0.504
TP53:248:01:ENST00000269305	19	COAD	1	TP53	248	ENST00000269305	19	176	0.5348	0.7327	0.5525	0.8256	0.531
PIK3CA:542:01:ENST00000263967	23	CESC	1	PIK3CA	542	ENST00000263967	16	44	0.5367	0.7099	0.5509	0.9999	0.9853
GATA3:350:01:ENST00000346208	4	BRCA	1	GATA3	350	ENST00000346208	4	119	0.5369	0	0.9981	0.9014	0.6615
TP53:273:01:ENST00000269305	17	LUSC	1	TP53	273	ENST00000269305	14	353	0.5369	1.352	0.4707	0.5722	0.3191
FGFR3:370:01:ENST00000260795	4	BLCA	1	FGFR3	370	ENST00000260795	4	49	0.5372	3.289	0.2683	0.0047	0.0179
TP53:163:01:ENST00000269305	7	LUSC	1	TP53	163	ENST00000269305	7	360	0.5376	0.485	0.4711	0.1108	0.0717
PTPRT:1266:06:ENST00000373187	4	SKCM	6	PTPRT	1266	ENST00000373187	4	72	0.5377	1.7422	0.4498	0.8038	0.5404
SCAF4:250:01:ENST00000286835	12	UCEC	1	SCAF4	250	ENST00000286835	12	24	0.5404	0	0.999	0.4964	0.2293
SULT1C3:95:06:ENST00000329106	4	SKCM	6	SULT1C3	95	ENST00000329106	4	8	0.5414	1.6719	0.5147	0.4752	0.1134
TPTE:123:06:ENST00000618007	7	SKCM	6	TPTE	123	ENST00000618007	5	52	0.5429	1.4059	0.525	0.8014	0.4694
OR4C16:135:01:ENST00000314634	5	STAD	1	OR4C16	135	ENST00000314634	5	6	0.5455	2.6814	0.421	0.2677	0.1097
CDKN2A:101:01:ENST00000304494	5	LUAD	1	CDKN2A	101	ENST00000304494	5	11	0.5476	1.7065	0.5977	0.4574	0.1999
TP53:158:01:ENST00000269305	7	LUAD	1	TP53	158	ENST00000269305	5	216	0.5524	0.7023	0.6234	0.4523	0.1672
TP53:213:01:ENST00000269305	6	STAD	1	TP53	213	ENST00000269305	6	170	0.554	1.4391	0.5393	0.9498	0.7408
ADAM28:75:01:ENST00000265769	6	UCEC	1	ADAM28	75	ENST00000265769	5	4	0.5556	NA	0.9995	0.1336	0.047
C11orf57:160:01:ENST00000280352	7	UCEC	1	C11orf57	160	ENST00000280352	7	5	0.5556	0.4364	0.5612	0.3386	0.1649
SRPR:170:01:ENST00000332118	7	UCEC	1	SRPR	170	ENST00000332118	5	13	0.5556	0	0.9994	0.7574	0.4677
TSPAN19:43:01:ENST00000532498	4	UCEC	1	TSPAN19	43	ENST00000532498	4	5	0.5556	0	0.9996	0.7911	0.4953
TAF1:843:01:ENST00000373790	6	UCEC	1	TAF1	843	ENST00000373790	6	52	0.5566	0	0.999	0.3224	0.1076
CCND1:287:01:ENST00000227507	6	UCEC	1	CCND1	287	ENST00000227507	5	22	0.5589	2.1217	0.5415	0.51	0.2792
TP53:294:01:ENST00000269305	4	HNSC	1	TP53	294	ENST00000269305	4	312	0.5603	0.5409	0.5404	0.3918	0.2353
TP53:280:01:ENST00000269305	5	HNSC	1	TP53	280	ENST00000269305	5	311	0.5637	1.4639	0.5143	0.9997	0.9792
UGT2A1:457:06:ENST00000503640	6	SKCM	6	UGT2A1	457	ENST00000503640	4	12	0.5659	0.6383	0.5724	0.6162	0.3514
TP53:187:01:ENST00000269305	6	LUSC	1	TP53	187	ENST00000269305	6	361	0.5671	1.4657	0.5131	0.9492	0.7552
TP53:176:01:ENST00000269305	6	STAD	1	TP53	176	ENST00000269305	5	171	0.5682	0.6892	0.6119	0.3015	0.0779
TP53:132:01:ENST00000269305	6	OV	1	TP53	132	ENST00000269305	6	358	0.5684	1.4003	0.5056	0.9997	0.9807
CDKN2A:84:01:ENST00000304494	7	LUSC	1	CDKN2A	84	ENST00000304494	6	64	0.5711	1.5081	0.5015	0.8522	0.5875
ZFHX3:763:01:ENST00000268489	10	UCEC	1	ZFHX3	763	ENST00000268489	8	69	0.5713	0.5826	0.6049	0.9791	0.8349
TP53:175:01:ENST00000269305	7	GBM	1	TP53	175	ENST00000269305	4	102	0.5714	0.5424	0.5447	0.0216	0.0361
SPECC1:303:01:ENST00000261503	23	STAD	1	SPECC1	303	ENST00000261503	6	6	0.5714	1.666	0.558	0.9427	0.7301
PIEZO2:1533:01:ENST00000503781	4	UCEC	1	PIEZO2	1533	ENST00000503781	4	25	0.5714	NA	NA	0.0371	0.0346
SPOP:117:01:ENST00000347630	9	UCEC	1	SPOP	117	ENST00000347630	9	28	0.5743	1.9751	0.5795	0.4798	0.2494
TP53:173:01:ENST00000269305	7	HNSC	1	TP53	173	ENST00000269305	7	309	0.5744	0.7335	0.5995	0.6908	0.36
SF3B1:700:01:ENST00000335508	8	BRCA	1	SF3B1	700	ENST00000335508	8	10	0.5745	0	0.9996	0.9384	0.7226
CCDC102B:367:06:ENST00000319445	4	SKCM	6	CCDC102B	367	ENST00000319445	4	15	0.5748	0.6454	0.5942	0.0912	0.0063
PIK3CA:88:01:ENST00000263967	10	COAD	1	PIK3CA	88	ENST00000263967	5	84	0.5754	1.4069	0.7421	0.5504	0.3181
LRRIQ3:379:06:ENST00000354431	7	SKCM	6	LRRIQ3	379	ENST00000354431	5	23	0.5757	0.6583	0.5944	0.9898	0.8846
SAMD9L:1516:01:ENST00000318238	9	STAD	1	SAMD9L	1516	ENST00000318238	4	11	0.5758	1.6566	0.6188	0.8439	0.5477
PIK3CA:88:01:ENST00000263967	31	UCEC	1	PIK3CA	88	ENST00000263967	17	193	0.5781	0.5082	0.5059	0.6386	0.3618
PTEN:268:01:ENST00000371953	9	UCEC	1	PTEN	268	ENST00000371953	8	249	0.5786	0	0.9963	0.7824	0.5013
CLASRP:95:01:ENST00000221455	6	UCEC	1	CLASRP	95	ENST00000221455	5	9	0.5794	2.4495	0.5285	0.9929	0.9044
DGKD:855:01:ENST00000264057	6	UCEC	1	DGKD	855	ENST00000264057	5	10	0.5794	1.8176	0.6289	0.701	0.4168
NLGN3:781:01:ENST00000358741	6	UCEC	1	NLGN3	781	ENST00000358741	5	18	0.5807	0	0.9992	0.8329	0.5562
PIK3CA:545:01:ENST00000263967	6	ESCA	1	PIK3CA	545	ENST00000263967	5	10	0.5821	2.0371	0.4798	0.2614	0.125
PIK3CA:345:01:ENST00000263967	5	STAD	1	PIK3CA	345	ENST00000263967	4	40	0.5823	1.5724	0.5542	0.9565	0.7724
CTNNB1:41:01:ENST00000349496	6	LIHC	1	CTNNB1	41	ENST00000349496	6	76	0.5835	0.5506	0.5589	0.841	0.5717
TP53:282:01:ENST00000269305	5	PAAD	1	TP53	282	ENST00000269305	5	107	0.5841	1.3502	0.5636	0.899	0.6224
FGFR2:549:01:ENST00000358487	11	UCEC	1	FGFR2	549	ENST00000358487	6	46	0.585	0	0.9985	0.2442	0.1286
TP53:132:01:ENST00000269305	4	BLCA	1	TP53	132	ENST00000269305	4	177	0.5874	1.6155	0.5054	0.2271	0.1676
CTNNB1:45:01:ENST00000349496	17	LIHC	1	CTNNB1	45	ENST00000349496	16	66	0.5882	0.7744	0.6107	0.5441	0.2559
TP53:224:01:ENST00000269305	5	HNSC	1	TP53	224	ENST00000269305	4	312	0.5883	1.635	0.4903	0.6438	0.4051
TP53:238:01:ENST00000269305	5	OV	1	TP53	238	ENST00000269305	5	359	0.5888	2.0031	0.3313	0.1322	0.1045
APC:1450:01:ENST00000257430	7	READ	1	APC	1450	ENST00000257430	5	97	0.5895	1.904	0.5403	0.9594	0.7799
PIK3CA:542:01:ENST00000263967	18	BLCA	1	PIK3CA	542	ENST00000263967	15	60	0.5916	0.8056	0.6102	0.9769	0.8275
PTEN:130:01:ENST00000371953	7	GBM	1	PTEN	130	ENST00000371953	6	102	0.5923	1.4903	0.449	0.4294	0.263
ARID1A:2141:01:ENST00000324856	6	UCEC	1	ARID1A	2141	ENST00000324856	6	179	0.5938	1.752	0.5859	0.6838	0.3569
PIK3R1:582:01:ENST00000521381	13	UCEC	1	PIK3R1	582	ENST00000521381	12	116	0.5945	0.5088	0.5081	0.0186	0.0138
WRN:1128:01:ENST00000298139	6	UCEC	1	WRN	1128	ENST00000298139	6	10	0.5954	0	0.9995	0.9456	0.7404
NFASC:165:01:ENST00000339876	9	UCEC	1	NFASC	165	ENST00000339876	7	28	0.5955	0	0.9992	0.9108	0.6707
KLHDC7A:635:06:ENST00000400664	12	SKCM	6	KLHDC7A	635	ENST00000400664	10	21	0.5968	0.7724	0.6134	0.5485	0.2583
APC:499:01:ENST00000257430	7	COAD	1	APC	499	ENST00000257430	6	251	0.597	0.5939	0.6055	0.9952	0.9195
CDKN2A:153:01:ENST00000304494	4	ESCA	1	CDKN2A	153	ENST00000304494	4	7	0.6	0.491	0.566	0.5323	0.2523
SPAG17:1194:01:ENST00000336338	6	UCEC	1	SPAG17	1194	ENST00000336338	4	26	0.6005	0	0.9993	0.9381	0.7268
NLRP9:7:01:ENST00000332836	4	UCEC	1	NLRP9	7	ENST00000332836	4	13	0.6008	0	0.9994	0.9922	0.8999
LRRC9:647:01:ENST00000445360	4	UCEC	1	LRRC9	647	ENST00000445360	4	8	0.602	2.2361	0.5699	0.9143	0.6645
TP53:261:01:ENST00000269305	5	OV	1	TP53	261	ENST00000269305	4	360	0.6024	1.4216	0.5461	0.9662	0.7847
FGFR2:252:01:ENST00000358487	22	UCEC	1	FGFR2	252	ENST00000358487	22	30	0.6026	1.4338	0.6105	0.9466	0.7397
CDKN2A:83:01:ENST00000304494	5	PAAD	1	CDKN2A	83	ENST00000304494	5	23	0.6043	0.7411	0.6381	0.7335	0.4004
HLA-B:209:01:ENST00000412585	6	COAD	1	HLA-B	209	ENST00000412585	5	6	0.6061	NA	0.9996	0.9906	0.8907
BMPR2:583:01:ENST00000374580	12	STAD	1	BMPR2	583	ENST00000374580	5	6	0.6061	2.6248	0.4312	0.8496	0.5601
SPRED1:79:01:ENST00000299084	5	UCEC	1	SPRED1	79	ENST00000299084	4	8	0.6061	0	0.9997	0.8309	0.5512
APC:935:01:ENST00000257430	9	COAD	1	APC	935	ENST00000257430	9	248	0.6072	1.326	0.635	0.8914	0.6237
DGKZ:1038:01:ENST00000454345	4	UCEC	1	DGKZ	1038	ENST00000454345	4	10	0.6074	NA	NA	0.4032	0.1579
PTCH1:1308:01:ENST00000331920	4	UCEC	1	PTCH1	1308	ENST00000331920	4	20	0.6074	0	0.9995	0.8444	0.5694
APC:805:01:ENST00000257430	7	COAD	1	APC	805	ENST00000257430	5	252	0.6078	0.6104	0.6248	0.6851	0.3545
PTEN:70:01:ENST00000371953	6	UCEC	1	PTEN	70	ENST00000371953	6	251	0.6079	1.508	0.6866	0.7839	0.5087
TP53:273:01:ENST00000269305	10	READ	1	TP53	273	ENST00000269305	9	83	0.6082	0.586	0.606	0.9981	0.9594
TP53:248:01:ENST00000269305	15	ESCA	1	TP53	248	ENST00000269305	14	131	0.6091	1.2036	0.6269	0.6236	0.3071
SCAF4:120:01:ENST00000286835	5	UCEC	1	SCAF4	120	ENST00000286835	4	32	0.6106	3.3284	0.3263	0.8584	0.6008
TP53:220:01:ENST00000269305	10	LGG	1	TP53	220	ENST00000269305	9	217	0.6124	0.5845	0.5958	0.9288	0.7073
PEAK1:871:01:ENST00000312493	5	UCEC	1	PEAK1	871	ENST00000312493	4	21	0.6128	0	0.9996	0.6227	0.3623
PPP2R1A:256:01:ENST00000322088	10	UCEC	1	PPP2R1A	256	ENST00000322088	10	54	0.6129	1.3328	0.6656	1	0.9957
NRAS:12:01:ENST00000369535	7	COAD	1	NRAS	12	ENST00000369535	6	9	0.6138	0.5244	0.5797	0.9426	0.7283
MEGF8:166:01:ENST00000251268	5	UCEC	1	MEGF8	166	ENST00000251268	5	30	0.6149	1.6748	0.6466	0.8269	0.5546
ZNF716:197:01:ENST00000420713	4	UCEC	1	ZNF716	197	ENST00000420713	4	9	0.6154	0	0.9996	0.9397	0.7232
APC:876:01:ENST00000257430	14	COAD	1	APC	876	ENST00000257430	12	245	0.6161	1.2643	0.6509	0.5397	0.2396
ARID1A:766:01:ENST00000324856	5	UCEC	1	ARID1A	766	ENST00000324856	5	180	0.6163	1.8817	0.5402	0.7903	0.4702
TP53:249:01:ENST00000269305	11	LUAD	1	TP53	249	ENST00000269305	8	213	0.6166	1.4146	0.558	0.7986	0.5223
MXRA5:2006:06:ENST00000217939	5	SKCM	6	MXRA5	2006	ENST00000217939	4	75	0.6171	1.6208	0.5164	0.7787	0.5141
CHD3:540:01:ENST00000330494	15	UCEC	1	CHD3	540	ENST00000330494	12	31	0.6184	2.6181	0.4962	0.6937	0.386
ERBB2:772:01:ENST00000269571	5	LUAD	1	ERBB2	772	ENST00000269571	5	7	0.6187	0.543	0.6008	0.3467	0.1533
TMCO4:13:01:ENST00000294543	4	BLCA	1	TMCO4	13	ENST00000294543	4	5	0.619	0.5486	0.6246	0.9661	0.7919
DHX16:1033:01:ENST00000376442	9	STAD	1	DHX16	1033	ENST00000376442	4	6	0.619	0.6387	0.6185	0.9946	0.917
MUC4:3516:01:ENST00000463781	12	BRCA	1	MUC4	3516	ENST00000463781	12	37	0.6203	1.5122	0.6541	0.945	0.7351
NCOR2:976:01:ENST00000405201	8	UCEC	1	NCOR2	976	ENST00000405201	7	31	0.6207	0	0.9992	0.4281	0.216
CTNNB1:45:01:ENST00000349496	5	UCEC	1	CTNNB1	45	ENST00000349496	4	93	0.6222	1.8662	0.5509	0.9757	0.8208
PTPRB:529:06:ENST00000261266	4	SKCM	6	PTPRB	529	ENST00000261266	4	50	0.6228	1.4071	0.5758	0.9909	0.8904
RBM27:816:01:ENST00000265271	8	UCEC	1	RBM27	816	ENST00000265271	6	9	0.6266	0	0.9995	0.1007	0.0385
TP53:175:01:ENST00000269305	12	HNSC	1	TP53	175	ENST00000269305	12	304	0.6286	1.213	0.6185	0.7845	0.4649
SWI5:34:06:ENST00000320188	5	SKCM	6	SWI5	34	ENST00000320188	4	4	0.6286	2.0732	0.5631	1	1
PTEN:267:01:ENST00000371953	10	UCEC	1	PTEN	267	ENST00000371953	9	248	0.6289	0.6411	0.6619	0.855	0.565
FHOD3:336:01:ENST00000359247	7	COAD	1	FHOD3	336	ENST00000359247	5	9	0.6294	0	0.9995	0.4247	0.2033
MECOM:205:01:ENST00000468789	4	UCEC	1	MECOM	205	ENST00000468789	4	9	0.6294	0	0.9997	0.5776	0.3175
TP53:125:01:ENST00000269305	4	HNSC	1	TP53	125	ENST00000269305	4	312	0.6298	1.5283	0.5517	0.5673	0.3531
TP53:220:01:ENST00000269305	4	STAD	1	TP53	220	ENST00000269305	4	172	0.6305	0.6103	0.6244	0.9964	0.9292
TP53:193:01:ENST00000269305	9	BRCA	1	TP53	193	ENST00000269305	9	314	0.6327	0	0.9966	0.0124	0.0131
TP53:273:01:ENST00000269305	20	COAD	1	TP53	273	ENST00000269305	19	176	0.634	1.2505	0.6382	0.8915	0.6428
DHX16:1033:01:ENST00000376442	8	UCEC	1	DHX16	1033	ENST00000376442	5	15	0.6347	2.2913	0.5612	0.8491	0.5587
NFE2L2:79:01:ENST00000397062	4	ESCA	1	NFE2L2	79	ENST00000397062	4	12	0.6352	1.8573	0.6133	0.6796	0.4116
SOHLH2:85:01:ENST00000379881	4	STAD	1	SOHLH2	85	ENST00000379881	4	12	0.6352	3.0277	0.434	0.3339	0.1765
HHIPL2:294:06:ENST00000343410	5	SKCM	6	HHIPL2	294	ENST00000343410	5	6	0.6364	1.4412	0.634	0.3437	0.0728
FGF13:23:01:ENST00000436198	6	UCEC	1	FGF13	23	ENST00000436198	5	7	0.6364	0	0.9996	0.579	0.3068
CDKN2A:58:01:ENST00000304494	11	HNSC	1	CDKN2A	58	ENST00000304494	10	81	0.6379	1.29	0.5927	0.5437	0.3054
DNAH7:346:01:ENST00000312428	5	UCEC	1	DNAH7	346	ENST00000312428	5	56	0.639	0	0.9987	0.5464	0.2983
KCNA4:221:01:ENST00000328224	8	UCEC	1	KCNA4	221	ENST00000328224	6	15	0.6393	0	0.9992	0.053	0.0295
PTEN:212:01:ENST00000371953	7	UCEC	1	PTEN	212	ENST00000371953	7	250	0.6394	0	0.9965	0.1889	0.1056
CR2:209:01:ENST00000367058	5	UCEC	1	CR2	209	ENST00000367058	4	16	0.6419	2.1135	0.5416	0.3213	0.1041
KRAS:12:01:ENST00000256078	7	TGCT	1	KRAS	12	ENST00000256078	7	6	0.6434	NA	0.9996	0.5972	0.3118
TP53:245:01:ENST00000269305	4	COAD	1	TP53	245	ENST00000269305	4	191	0.6441	0	0.9966	0.0326	0.04
TP53:179:01:ENST00000269305	4	PAAD	1	TP53	179	ENST00000269305	4	108	0.6452	1.6176	0.5075	0.113	0.1099
CDH1:23:01:ENST00000261769	9	BRCA	1	CDH1	23	ENST00000261769	9	121	0.6453	0.6136	0.6379	0.9258	0.6886
INTU:661:01:ENST00000335251	4	UCEC	1	INTU	661	ENST00000335251	4	8	0.6465	0	0.9995	0.9992	0.9672
KMT2D:2354:01:ENST00000301067	7	COAD	1	KMT2D	2354	ENST00000301067	4	28	0.6488	1.5477	0.6906	0.9653	0.7866
TP53:331:01:ENST00000269305	9	BLCA	1	TP53	331	ENST00000269305	7	174	0.6496	0.702	0.6212	0.2475	0.1418
XYLT2:529:01:ENST00000017003	18	UCEC	1	XYLT2	529	ENST00000017003	17	5	0.6507	NA	0.9992	0.0736	0.0425
PAX6:375:01:ENST00000241001	5	COAD	1	PAX6	375	ENST00000241001	4	5	0.6508	0	0.9996	0.6096	0.3272
KMT2B:553:01:ENST00000420124	6	UCEC	1	KMT2B	553	ENST00000420124	5	71	0.6519	0	0.9989	0.0559	0.0453
TP53:336:01:ENST00000269305	5	BLCA	1	TP53	336	ENST00000269305	5	176	0.6532	0.7354	0.6681	0.7848	0.5151
TP53:248:01:ENST00000269305	11	READ	1	TP53	248	ENST00000269305	8	84	0.6532	1.3204	0.7151	0.7917	0.4776
ARID1A:1276:01:ENST00000324856	6	UCEC	1	ARID1A	1276	ENST00000324856	6	179	0.6532	1.6589	0.6229	0.9268	0.7039
MEGF6:1440:01:ENST00000356575	4	UCEC	1	MEGF6	1440	ENST00000356575	4	14	0.6542	0	0.9995	0.8947	0.6282
CAPN13:405:06:ENST00000295055	5	SKCM	6	CAPN13	405	ENST00000295055	4	18	0.6559	1.4886	0.6161	0.4399	0.2552
ART1:246:01:ENST00000250693	4	UCEC	1	ART1	246	ENST00000250693	4	4	0.6571	2	0.6311	0.6923	0.3958
PIK3CA:118:01:ENST00000263967	5	BRCA	1	PIK3CA	118	ENST00000263967	5	298	0.6572	1.592	0.6482	0.9495	0.7405
BAG6:115:01:ENST00000375964	4	UCEC	1	BAG6	115	ENST00000375964	4	9	0.6573	2.3094	0.555	0.2857	0.0838
COL7A1:2029:01:ENST00000328333	5	UCEC	1	COL7A1	2029	ENST00000328333	4	29	0.6573	0	0.9988	0.9996	0.9707
APC:1378:01:ENST00000257430	6	COAD	1	APC	1378	ENST00000257430	6	251	0.6575	1.3659	0.6648	0.9992	0.9674
HBD:48:06:ENST00000380299	5	SKCM	6	HBD	48	ENST00000380299	4	8	0.6586	1.5039	0.6572	0.999	0.9651
ING1:339:01:ENST00000375774	4	UCEC	1	ING1	339	ENST00000375774	4	10	0.6593	0	0.9996	0.9985	0.9561
RAE1:351:01:ENST00000371242	4	UCEC	1	RAE1	351	ENST00000371242	4	10	0.6593	0	0.9996	0.4594	0.1883
UNC5C:44:01:ENST00000453304	7	UCEC	1	UNC5C	44	ENST00000453304	4	10	0.6593	0	0.9996	0.8739	0.6082
MYO18B:1680:06:ENST00000536101	4	SKCM	6	MYO18B	1680	ENST00000536101	4	51	0.6603	1.3191	0.651	0.974	0.8125
APC:941:01:ENST00000257430	4	COAD	1	APC	941	ENST00000257430	4	253	0.661	0	0.9967	0.0168	0.0278
SPHKAP:954:06:ENST00000392056	4	SKCM	6	SPHKAP	954	ENST00000392056	4	73	0.6625	0.7581	0.7034	0.9991	0.9657
ZMIZ1:1051:01:ENST00000334512	6	UCEC	1	ZMIZ1	1051	ENST00000334512	5	11	0.663	1.5811	0.648	0.9945	0.9158
PPP2R1A:183:01:ENST00000322088	9	UCEC	1	PPP2R1A	183	ENST00000322088	8	56	0.6642	0.612	0.6398	0.9293	0.7071
TP53:135:01:ENST00000269305	4	BRCA	1	TP53	135	ENST00000269305	4	319	0.6645	1.5933	0.6451	0.9861	0.8639
TP53:242:01:ENST00000269305	6	LUSC	1	TP53	242	ENST00000269305	5	362	0.6661	0.761	0.7017	0.9648	0.7841
GNAS:201:01:ENST00000371085	7	COAD	1	GNAS	201	ENST00000371085	6	4	0.6667	NA	0.9994	0.7865	0.483
PCBP1:100:01:ENST00000303577	8	COAD	1	PCBP1	100	ENST00000303577	8	4	0.6667	0	0.9996	0.8003	0.4886
PCBP1:102:01:ENST00000303577	5	COAD	1	PCBP1	102	ENST00000303577	4	8	0.6667	NA	0.9996	0.8003	0.4886
USP40:1147:01:ENST00000251722	4	UCEC	1	USP40	1147	ENST00000251722	4	7	0.6667	1.8909	0.6128	0.1425	0.0612
CTNNB1:45:01:ENST00000349496	7	ACC	1	CTNNB1	45	ENST00000349496	7	5	0.6692	1.4968	0.6424	0.9397	0.7233
C6:277:01:ENST00000263413	5	UCEC	1	C6	277	ENST00000263413	5	17	0.6702	2.0917	0.6032	0.911	0.6607
CDKN2A:153:01:ENST00000304494	10	HNSC	1	CDKN2A	153	ENST00000304494	8	83	0.6714	0.8138	0.6942	0.9968	0.9369
MYO10:1223:01:ENST00000513610	6	UCEC	1	MYO10	1223	ENST00000513610	6	23	0.6719	1.8937	0.6036	0.9393	0.7281
CCDC7:242:01:ENST00000375025	6	UCEC	1	CCDC7	242	ENST00000375025	6	10	0.6728	1.972	0.6323	0.8856	0.6272
MKI67:233:01:ENST00000368654	4	UCEC	1	MKI67	233	ENST00000368654	4	37	0.6732	2.5441	0.4197	0.641	0.3146
TP53:273:01:ENST00000269305	8	BLCA	1	TP53	273	ENST00000269305	7	174	0.6738	1.2487	0.6651	0.9799	0.8375
STK11:245:01:ENST00000326873	4	LUAD	1	STK11	245	ENST00000326873	4	74	0.6738	1.4179	0.6347	0.9674	0.8025
PIK3CA:420:01:ENST00000263967	7	UCEC	1	PIK3CA	420	ENST00000263967	7	203	0.6742	0	0.997	0.0198	0.0203
MCF2:692:01:ENST00000370576	6	UCEC	1	MCF2	692	ENST00000370576	4	20	0.6744	0	0.9995	0.947	0.7372
BZW1:285:01:ENST00000409600	9	UCEC	1	BZW1	285	ENST00000409600	6	5	0.6753	1.5811	0.7477	0.4096	0.1873
PIK3CA:542:01:ENST00000263967	18	HNSC	1	PIK3CA	542	ENST00000263967	17	63	0.6761	0.8385	0.6718	0.4995	0.2587
DOCK8:1113:01:ENST00000432829	10	UCEC	1	DOCK8	1113	ENST00000432829	6	13	0.6762	0.6948	0.7669	0.9712	0.8104
NRG1:91:01:ENST00000405005	4	UCEC	1	NRG1	91	ENST00000405005	4	11	0.6769	0	0.9993	0.8912	0.6242
PIK3CA:344:01:ENST00000263967	7	UCEC	1	PIK3CA	344	ENST00000263967	7	203	0.6769	0.6498	0.6736	0.5859	0.2724
TP53:175:01:ENST00000269305	5	PAAD	1	TP53	175	ENST00000269305	5	107	0.6772	0.7474	0.6859	0.8411	0.5772
NBEAL1:136:01:ENST00000449802	8	UCEC	1	NBEAL1	136	ENST00000449802	7	22	0.6779	0	0.9991	0.4998	0.2625
DNAH11:4414:01:ENST00000409508	4	COAD	1	DNAH11	4414	ENST00000409508	4	44	0.6825	0	0.9986	0.3208	0.1764
TP53:331:01:ENST00000269305	7	LUSC	1	TP53	331	ENST00000269305	7	360	0.6828	0.5865	0.5955	0.012	0.0168
CCDC141:1204:06:ENST00000420890	5	SKCM	6	CCDC141	1204	ENST00000420890	4	32	0.6828	1.4352	0.634	0.8778	0.628
TP53:282:01:ENST00000269305	9	HNSC	1	TP53	282	ENST00000269305	8	308	0.6831	0.8302	0.7137	0.8823	0.6024
CTNNB1:34:01:ENST00000349496	14	UCEC	1	CTNNB1	34	ENST00000349496	14	83	0.6845	0.5701	0.5913	0.7714	0.4605
WDR47:81:01:ENST00000369962	5	UCEC	1	WDR47	81	ENST00000369962	4	12	0.6846	2.4152	0.533	0.9311	0.7006
PCLO:4133:06:ENST00000333891	5	SKCM	6	PCLO	4133	ENST00000333891	5	133	0.6847	1.2925	0.6659	0.9964	0.9314
PIK3CA:1044:01:ENST00000263967	8	UCEC	1	PIK3CA	1044	ENST00000263967	6	204	0.6913	1.3638	0.7606	0.8882	0.6392
TP53:241:01:ENST00000269305	10	UCEC	1	TP53	241	ENST00000269305	9	165	0.6922	0.5984	0.6125	0.1814	0.0975
POLR2A:529:01:ENST00000617998	5	UCEC	1	POLR2A	529	ENST00000617998	5	17	0.6931	1.3016	0.8198	0.851	0.5578
ZNF534:305:06:ENST00000332323	6	SKCM	6	ZNF534	305	ENST00000332323	5	11	0.6932	1.3542	0.6826	0.5487	0.2395
ARID5B:456:01:ENST00000279873	4	UCEC	1	ARID5B	456	ENST00000279873	4	47	0.694	1.6313	0.6632	0.7072	0.3776
OR4D5:217:06:ENST00000307033	6	SKCM	6	OR4D5	217	ENST00000307033	5	7	0.6944	1.3886	0.6962	0.5901	0.2828
TP53:173:01:ENST00000269305	4	LGG	1	TP53	173	ENST00000269305	4	222	0.6945	0	0.996	0.3091	0.181
GRM8:720:01:ENST00000339582	7	UCEC	1	GRM8	720	ENST00000339582	6	17	0.6945	2.7386	0.4767	0.3848	0.1914
FLNB:531:01:ENST00000295956	8	UCEC	1	FLNB	531	ENST00000295956	7	28	0.6969	0	0.9992	0.2824	0.1398
TP53:248:01:ENST00000269305	7	UCS	1	TP53	248	ENST00000269305	6	43	0.6974	0.8005	0.7168	0.9832	0.8558
CHD4:975:01:ENST00000357008	6	UCEC	1	CHD4	975	ENST00000357008	6	60	0.6977	1.5078	0.6982	0.5456	0.3108
ALX4:339:01:ENST00000329255	6	UCEC	1	ALX4	339	ENST00000329255	5	4	0.6984	NA	0.9996	0.7381	0.4308
FBXW7:689:01:ENST00000281708	6	UCEC	1	FBXW7	689	ENST00000281708	4	65	0.6984	1.6599	0.633	0.9882	0.8798
DDX17:163:01:ENST00000403230	4	UCEC	1	DDX17	163	ENST00000403230	4	8	0.699	0	0.9996	0.9761	0.8267
KIAA2026:730:01:ENST00000399933	5	UCEC	1	KIAA2026	730	ENST00000399933	5	14	0.7009	0	0.9995	0.9998	0.9836
DYRK1A:151:01:ENST00000398960	8	UCEC	1	DYRK1A	151	ENST00000398960	5	21	0.701	1.913	0.5979	0.9919	0.8991
ERBB3:104:01:ENST00000267101	10	STAD	1	ERBB3	104	ENST00000267101	5	14	0.7011	0.7837	0.7207	0.9657	0.7939
AMICA1:184:06:ENST00000356289	5	SKCM	6	AMICA1	184	ENST00000356289	4	9	0.7021	1.3329	0.7407	0.9641	0.785
NBEA:1121:01:ENST00000400445	7	UCEC	1	NBEA	1121	ENST00000400445	5	38	0.7028	0	0.9987	0.3234	0.1731
CHD4:1105:01:ENST00000357008	11	UCEC	1	CHD4	1105	ENST00000357008	10	56	0.7029	1.3803	0.6809	0.9232	0.6931
CDKN2A:51:06:ENST00000304494	4	SKCM	6	CDKN2A	51	ENST00000304494	4	32	0.7032	1.2566	0.776	0.7541	0.4242
NBN:466:01:ENST00000265433	4	UCEC	1	NBN	466	ENST00000265433	4	10	0.7033	2.357	0.5503	0.5129	0.2234
IQSEC2:283:01:ENST00000396435	9	UCEC	1	IQSEC2	283	ENST00000396435	8	25	0.7067	0	0.9995	0.8981	0.6537
IGSF9:52:01:ENST00000368094	5	UCEC	1	IGSF9	52	ENST00000368094	5	17	0.7083	1.4489	0.7501	0.7748	0.4565
TP53:331:01:ENST00000269305	4	HNSC	1	TP53	331	ENST00000269305	4	312	0.7091	0.7864	0.7365	0.8155	0.496
FOXM1:671:01:ENST00000359843	6	UCEC	1	FOXM1	671	ENST00000359843	6	10	0.7095	0	0.9996	0.6674	0.3784
ABCA12:1671:01:ENST00000272895	9	STAD	1	ABCA12	1671	ENST00000272895	4	26	0.7126	0.7749	0.7376	0.9923	0.902
CPEB2:544:01:ENST00000507071	9	UCEC	1	CPEB2	544	ENST00000507071	8	6	0.7133	0.6547	0.7666	0.999	0.9639
ABCC5:1090:01:ENST00000334444	7	UCEC	1	ABCC5	1090	ENST00000334444	4	6	0.7143	2	0.624	0.9836	0.8544
KCND2:5:01:ENST00000331113	5	UCEC	1	KCND2	5	ENST00000331113	5	12	0.7146	0.6468	0.707	0.6216	0.3469
TRRAP:722:06:ENST00000359863	7	SKCM	6	TRRAP	722	ENST00000359863	6	31	0.7148	1.2913	0.6938	0.9835	0.8569
CDH1:63:01:ENST00000261769	4	BRCA	1	CDH1	63	ENST00000261769	4	126	0.7153	1.2429	0.8361	0.5906	0.2666
TP53:176:01:ENST00000269305	9	OV	1	TP53	176	ENST00000269305	8	356	0.7154	0.8522	0.7517	0.9406	0.7343
EGFR:108:01:ENST00000275493	5	GBM	1	EGFR	108	ENST00000275493	5	77	0.7169	0.8662	0.7814	0.9699	0.7987
TP53:331:01:ENST00000269305	4	COAD	1	TP53	331	ENST00000269305	4	191	0.717	1.3535	0.7653	0.6698	0.4034
MYO3A:1192:01:ENST00000265944	8	UCEC	1	MYO3A	1192	ENST00000265944	7	24	0.7177	0.6497	0.6941	0.6815	0.3662
PIK3CA:545:01:ENST00000263967	35	COAD	1	PIK3CA	545	ENST00000263967	31	58	0.7179	1.193	0.7327	0.991	0.8968
SVIL:1863:01:ENST00000355867	11	COAD	1	SVIL	1863	ENST00000355867	5	8	0.7179	0	0.9996	0.7683	0.4642
ZFHX2:1924:01:ENST00000419474	4	UCEC	1	ZFHX2	1924	ENST00000419474	4	9	0.7189	0	0.9995	0.8728	0.6082
APC:554:01:ENST00000257430	4	COAD	1	APC	554	ENST00000257430	4	253	0.7229	0.6841	0.7071	0.7052	0.3762
PREX2:1404:06:ENST00000288368	5	SKCM	6	PREX2	1404	ENST00000288368	4	57	0.7234	0.6813	0.7084	0.8313	0.5647
APC:564:01:ENST00000257430	6	COAD	1	APC	564	ENST00000257430	4	253	0.727	1.3576	0.7622	0.6385	0.391
GUF1:645:01:ENST00000281543	5	COAD	1	GUF1	645	ENST00000281543	4	7	0.7273	1.5068	0.7408	0.594	0.3261
TP53:176:01:ENST00000269305	4	ESCA	1	TP53	176	ENST00000269305	4	141	0.7287	1.1927	0.7672	0.3643	0.0942
PCLO:2442:01:ENST00000333891	9	UCEC	1	PCLO	2442	ENST00000333891	5	59	0.7297	0	0.9986	0.4068	0.2236
RPL22:15:01:ENST00000234875	25	STAD	1	RPL22	15	ENST00000234875	5	4	0.7302	1.3531	0.7289	0.8665	0.6042
TP53:105:01:ENST00000269305	5	LUSC	1	TP53	105	ENST00000269305	5	362	0.7312	0.8591	0.7948	0.4401	0.1482
ARMC4:705:06:ENST00000305242	5	SKCM	6	ARMC4	705	ENST00000305242	4	49	0.7318	1.2189	0.7501	0.4551	0.1511
PIK3CA:542:01:ENST00000263967	5	STAD	1	PIK3CA	542	ENST00000263967	4	40	0.732	0.6731	0.708	0.8818	0.6007
ARID1A:1407:01:ENST00000324856	4	UCEC	1	ARID1A	1407	ENST00000324856	4	181	0.7321	0	0.9982	0.0943	0.075
ATP2A1:571:01:ENST00000357084	6	UCEC	1	ATP2A1	571	ENST00000357084	4	17	0.7345	0	0.9996	0.8796	0.5987
TP53:220:01:ENST00000269305	5	GBM	1	TP53	220	ENST00000269305	5	101	0.735	0.8568	0.7938	0.9287	0.7131
SALL4:995:01:ENST00000217086	7	UCEC	1	SALL4	995	ENST00000217086	4	18	0.7355	0	0.9995	0.8969	0.6498
CHD4:1162:01:ENST00000357008	6	UCEC	1	CHD4	1162	ENST00000357008	6	60	0.7356	1.4201	0.7399	0.6039	0.3515
PDS5B:724:01:ENST00000315596	4	UCEC	1	PDS5B	724	ENST00000315596	4	22	0.7361	2.42	0.4709	0.4723	0.1931
CNGB1:144:01:ENST00000251102	6	UCEC	1	CNGB1	144	ENST00000251102	5	14	0.7368	0	0.9996	0.7835	0.4775
DMBT1:175:06:ENST00000338354	4	SKCM	6	DMBT1	175	ENST00000338354	4	51	0.7388	1.3703	0.6738	0.5377	0.3277
NFE2L2:79:01:ENST00000397062	10	LUSC	1	NFE2L2	79	ENST00000397062	9	62	0.7389	0.7545	0.705	0.2599	0.1333
NRAS:12:06:ENST00000369535	5	SKCM	6	NRAS	12	ENST00000369535	4	90	0.7405	1.2387	0.7203	0.7585	0.4122
RNF6:593:01:ENST00000346166	8	UCEC	1	RNF6	593	ENST00000346166	6	4	0.7429	0.4714	0.6004	0.7785	0.4878
NRIP1:729:01:ENST00000318948	5	UCEC	1	NRIP1	729	ENST00000318948	4	19	0.7431	0	0.9993	0.5837	0.3316
APC:1450:01:ENST00000257430	23	COAD	1	APC	1450	ENST00000257430	19	238	0.7441	1.1554	0.757	0.8786	0.6231
PCDHGB4:137:06:ENST00000519479	4	SKCM	6	PCDHGB4	137	ENST00000519479	4	9	0.7441	0.6534	0.7178	0.9909	0.8914
TP53:275:01:ENST00000269305	5	LGG	1	TP53	275	ENST00000269305	4	222	0.7447	1.5076	0.6866	0.9971	0.9394
ZNF804A:814:01:ENST00000302277	4	COAD	1	ZNF804A	814	ENST00000302277	4	14	0.7451	1.118	0.9419	0.4927	0.2031
PCDHB4:751:06:ENST00000194152	4	SKCM	6	PCDHB4	751	ENST00000194152	4	29	0.7465	1.2528	0.7197	0.659	0.3199
APC:216:01:ENST00000257430	11	COAD	1	APC	216	ENST00000257430	10	247	0.7472	0.7753	0.7236	0.9529	0.7572
TP53:286:01:ENST00000269305	5	LUAD	1	TP53	286	ENST00000269305	5	216	0.7475	1.2885	0.7245	0.9949	0.9211
PIK3CA:1047:01:ENST00000263967	7	LUSC	1	PIK3CA	1047	ENST00000263967	7	45	0.7476	1.2905	0.687	0.4763	0.2625
TP53:272:01:ENST00000269305	6	OV	1	TP53	272	ENST00000269305	6	358	0.7476	0.8555	0.7894	0.776	0.4526
PIK3CA:545:01:ENST00000263967	6	LUAD	1	PIK3CA	545	ENST00000263967	5	19	0.7488	0.7857	0.7584	0.8978	0.6513
GATA3:408:01:ENST00000346208	14	BRCA	1	GATA3	408	ENST00000346208	12	111	0.7492	0.8277	0.78	0.3057	0.1014
ADAMTSL4:757:01:ENST00000271643	8	UCEC	1	ADAMTSL4	757	ENST00000271643	7	20	0.7507	0	0.9992	0.9585	0.7688
C8orf34:256:06:ENST00000518698	4	SKCM	6	C8orf34	256	ENST00000518698	4	24	0.7512	1.2404	0.739	0.7343	0.3942
DNAH5:742:06:ENST00000265104	5	SKCM	6	DNAH5	742	ENST00000265104	4	152	0.752	0.7017	0.726	0.1815	0.1263
BRAF:600:01:ENST00000288602	10	LUAD	1	BRAF	600	ENST00000288602	9	25	0.7547	1.2026	0.7601	0.9923	0.9009
MFRP:384:01:ENST00000449574	8	UCEC	1	MFRP	384	ENST00000449574	7	10	0.7551	1.5811	0.7461	0.8321	0.5406
KDM6A:555:01:ENST00000377967	8	BLCA	1	KDM6A	555	ENST00000377967	8	90	0.7555	0.8621	0.7779	0.2962	0.0847
PPM1D:512:01:ENST00000305921	4	UCEC	1	PPM1D	512	ENST00000305921	4	8	0.7556	0	0.9996	0.5959	0.327
IGSF9B:147:01:ENST00000321016	7	UCEC	1	IGSF9B	147	ENST00000321016	4	21	0.7557	0	0.9993	0.0605	0.0481
MKI67:1857:01:ENST00000368654	7	UCEC	1	MKI67	1857	ENST00000368654	7	34	0.7565	1.5754	0.694	0.3077	0.1
PIK3CA:1047:01:ENST00000263967	4	LIHC	1	PIK3CA	1047	ENST00000263967	4	7	0.7576	0	0.9994	0.0398	0.0169
TP53:195:01:ENST00000269305	5	BRCA	1	TP53	195	ENST00000269305	4	319	0.7603	0	0.9958	0.385	0.2223
TP53:195:01:ENST00000269305	12	OV	1	TP53	195	ENST00000269305	12	352	0.7605	1.1802	0.6896	0.5814	0.3326
STAMBPL1:405:01:ENST00000371924	5	UCEC	1	STAMBPL1	405	ENST00000371924	4	6	0.7619	0.6124	0.7301	0.8959	0.6389
SEC16A:2066:01:ENST00000313050	4	UCEC	1	SEC16A	2066	ENST00000313050	4	22	0.7623	0	0.9994	0.8598	0.595
FAHD2A:281:01:ENST00000233379	7	UCEC	1	FAHD2A	281	ENST00000233379	7	4	0.7636	NA	0.9996	0.7533	0.446
PTEN:130:01:ENST00000371953	5	BRCA	1	PTEN	130	ENST00000371953	5	38	0.7647	0.6661	0.7174	0.8779	0.5964
TP53:241:01:ENST00000269305	7	OV	1	TP53	241	ENST00000269305	6	358	0.7657	0.8974	0.8304	0.8471	0.5402
TPTE:423:06:ENST00000618007	5	SKCM	6	TPTE	423	ENST00000618007	4	53	0.766	1.2231	0.7406	0.9709	0.8013
PIK3R2:373:01:ENST00000222254	5	UCEC	1	PIK3R2	373	ENST00000222254	4	9	0.7664	1.5697	0.7002	0.3197	0.1639
KRT5:310:01:ENST00000252242	5	HNSC	1	KRT5	310	ENST00000252242	4	16	0.7666	1.2182	0.7856	0.3438	0.1075
SPOP:87:01:ENST00000347630	7	PRAD	1	SPOP	87	ENST00000347630	7	48	0.7681	0	0.9995	0.3388	0.1756
TP53:179:01:ENST00000269305	4	STAD	1	TP53	179	ENST00000269305	4	172	0.7688	0.7062	0.7306	0.9356	0.7248
PSME4:1805:01:ENST00000404125	6	UCEC	1	PSME4	1805	ENST00000404125	6	17	0.7705	1.4441	0.7648	0.9344	0.717
CD1E:85:01:ENST00000368167	5	STAD	1	CD1E	85	ENST00000368167	4	4	0.7714	1.8229	0.6246	0.8621	0.5922
BMPR2:583:01:ENST00000374580	5	UCEC	1	BMPR2	583	ENST00000374580	4	6	0.7714	0.6689	0.7448	0.9358	0.7172
TP53:307:01:ENST00000269305	4	HNSC	1	TP53	307	ENST00000269305	4	312	0.7729	0.831	0.7956	0.7743	0.4411
FBXW7:465:01:ENST00000281708	15	COAD	1	FBXW7	465	ENST00000281708	10	35	0.7733	0.6714	0.7125	0.8852	0.6276
KANSL1:968:01:ENST00000574590	5	UCEC	1	KANSL1	968	ENST00000574590	5	35	0.7746	0	0.9988	0.3389	0.1795
TP53:175:01:ENST00000269305	19	BRCA	1	TP53	175	ENST00000269305	19	304	0.7748	1.1799	0.7817	0.7123	0.4268
PTPRT:695:06:ENST00000373187	4	SKCM	6	PTPRT	695	ENST00000373187	4	72	0.7749	0.7152	0.7421	0.4014	0.2358
PDE1A:114:06:ENST00000410103	5	SKCM	6	PDE1A	114	ENST00000410103	4	29	0.7764	1.2364	0.7378	0.9947	0.9193
TENM2:1070:06:ENST00000518659	4	SKCM	6	TENM2	1070	ENST00000518659	4	29	0.7772	1.2326	0.7432	0.9329	0.6966
TP53:220:01:ENST00000269305	5	ESCA	1	TP53	220	ENST00000269305	4	141	0.7787	1.6078	0.6403	0.0753	0.0729
MUC4:3516:01:ENST00000463781	17	LIHC	1	MUC4	3516	ENST00000463781	16	18	0.7793	0.8309	0.7827	0.8863	0.6238
KCNQ5:273:06:ENST00000370398	6	SKCM	6	KCNQ5	273	ENST00000370398	4	34	0.7799	0.8231	0.8008	0.6109	0.2848
OR4S2:120:06:ENST00000312422	4	SKCM	6	OR4S2	120	ENST00000312422	4	9	0.7804	0.6738	0.7379	0.9958	0.9266
PXDN:865:01:ENST00000252804	9	STAD	1	PXDN	865	ENST00000252804	4	24	0.7806	1.2182	0.8051	0.9207	0.6745
TP53:193:01:ENST00000269305	4	LGG	1	TP53	193	ENST00000269305	4	222	0.7823	1.3899	0.7455	0.9878	0.8785
FBXW7:505:01:ENST00000281708	7	CESC	1	FBXW7	505	ENST00000281708	4	21	0.7847	0.7466	0.79	0.7595	0.4391
PHF2:492:01:ENST00000359246	10	UCEC	1	PHF2	492	ENST00000359246	10	12	0.7847	0.7357	0.7962	0.0061	0.0029
TP53:273:01:ENST00000269305	22	UCEC	1	TP53	273	ENST00000269305	21	153	0.7858	1.122	0.7936	0.9911	0.895
PIK3CA:542:01:ENST00000263967	12	LUSC	1	PIK3CA	542	ENST00000263967	11	41	0.7872	1.161	0.7673	0.7098	0.4265
PPP2R1A:257:01:ENST00000322088	4	UCEC	1	PPP2R1A	257	ENST00000322088	4	60	0.7878	1.3716	0.7636	0.9348	0.7223
TEX10:5:01:ENST00000374902	5	UCEC	1	TEX10	5	ENST00000374902	4	11	0.7883	2.1602	0.5863	0.8695	0.5889
FXR1:124:01:ENST00000357559	5	UCEC	1	FXR1	124	ENST00000357559	5	9	0.7892	1.8708	0.658	0.4785	0.2033
SCN7A:445:06:ENST00000409855	5	SKCM	6	SCN7A	445	ENST00000409855	5	26	0.7904	1.3078	0.7297	0.4231	0.2391
PHACTR2:196:01:ENST00000427704	4	UCEC	1	PHACTR2	196	ENST00000427704	4	6	0.7905	0	0.9996	0.3316	0.1452
PRCC:380:01:ENST00000271526	6	UCEC	1	PRCC	380	ENST00000271526	6	4	0.7905	NA	0.9996	0.8563	0.5749
B4GALNT4:991:01:ENST00000329962	5	UCEC	1	B4GALNT4	991	ENST00000329962	5	9	0.7912	0	0.9996	0.2034	0.0853
WBSCR17:289:06:ENST00000333538	4	SKCM	6	WBSCR17	289	ENST00000333538	4	28	0.7914	1.3263	0.7129	0.5296	0.3157
EGFR:598:01:ENST00000275493	4	LGG	1	EGFR	598	ENST00000275493	4	26	0.7915	1.3406	0.7055	0.5415	0.3216
CEP350:2889:01:ENST00000367607	4	UCEC	1	CEP350	2889	ENST00000367607	4	29	0.7934	0	0.9993	0.7583	0.4795
ZNF358:132:01:ENST00000394341	5	UCEC	1	ZNF358	132	ENST00000394341	4	5	0.7937	1.118	0.9372	0.9361	0.7222
TTK:192:01:ENST00000369798	6	STAD	1	TTK	192	ENST00000369798	4	7	0.7939	1.2488	0.8083	0.8917	0.6363
TP53:157:01:ENST00000269305	4	BRCA	1	TP53	157	ENST00000269305	4	319	0.7942	0	0.996	0.3861	0.2235
ERCC2:238:01:ENST00000391945	9	BLCA	1	ERCC2	238	ENST00000391945	8	23	0.7946	0.8373	0.7936	0.9096	0.6692
PTEN:342:01:ENST00000371953	5	UCEC	1	PTEN	342	ENST00000371953	4	253	0.7946	1.3655	0.7593	0.8887	0.6125
CD93:315:01:ENST00000246006	6	UCEC	1	CD93	315	ENST00000246006	5	17	0.7953	0	0.9993	0.9728	0.8061
TP53:157:01:ENST00000269305	5	OV	1	TP53	157	ENST00000269305	5	359	0.7966	0.8576	0.8289	0.6108	0.3697
ANXA13:151:01:ENST00000419625	4	UCEC	1	ANXA13	151	ENST00000419625	4	6	0.8	1.7321	0.6984	0.9996	0.9774
PTEN:173:01:ENST00000371953	11	UCEC	1	PTEN	173	ENST00000371953	7	250	0.8005	1.1618	0.8827	0.8883	0.6366
TP53:110:01:ENST00000269305	5	HNSC	1	TP53	110	ENST00000269305	5	311	0.8014	0.8358	0.8016	0.9953	0.9206
UBR4:2803:01:ENST00000375254	6	UCEC	1	UBR4	2803	ENST00000375254	5	38	0.8017	0	0.9989	0.3023	0.0913
APC:1556:01:ENST00000257430	12	COAD	1	APC	1556	ENST00000257430	9	248	0.8025	1.1145	0.8554	0.7725	0.4529
NOTCH1:357:01:ENST00000277541	8	LGG	1	NOTCH1	357	ENST00000277541	8	27	0.8025	1.3837	0.7751	0.4531	0.2339
MORC1:55:06:ENST00000232603	4	SKCM	6	MORC1	55	ENST00000232603	4	45	0.8028	1.2596	0.7568	0.8201	0.5566
KRAS:13:01:ENST00000256078	8	LUAD	1	KRAS	13	ENST00000256078	8	125	0.8061	0.8678	0.8138	0.5916	0.276
KCNB1:736:01:ENST00000371741	5	UCEC	1	KCNB1	736	ENST00000371741	4	7	0.8061	0	0.9996	0.7068	0.3991
NPAT:243:01:ENST00000278612	4	UCEC	1	NPAT	243	ENST00000278612	4	17	0.8063	0	0.9995	0.6792	0.4049
CTNNB1:32:01:ENST00000349496	17	LIHC	1	CTNNB1	32	ENST00000349496	17	65	0.8064	1.1226	0.8176	0.8254	0.5439
DENND1C:164:01:ENST00000381480	6	UCEC	1	DENND1C	164	ENST00000381480	6	7	0.8065	1.0801	0.9566	0.8139	0.5224
PRKDC:3605:01:ENST00000314191	5	UCEC	1	PRKDC	3605	ENST00000314191	5	42	0.8067	0	0.9988	0.9956	0.9223
INPPL1:976:01:ENST00000298229	11	UCEC	1	INPPL1	976	ENST00000298229	11	36	0.8072	1.1093	0.8978	0.4721	0.2434
ACVR2A:96:01:ENST00000241416	8	UCEC	1	ACVR2A	96	ENST00000241416	8	29	0.8073	0.6882	0.7334	0.9512	0.7546
TP53:159:01:ENST00000269305	4	BLCA	1	TP53	159	ENST00000269305	4	177	0.8079	1.2091	0.7915	0.7204	0.4633
OR10X1:310:06:ENST00000368150	5	SKCM	6	OR10X1	310	ENST00000368150	4	5	0.8095	0.5914	0.6685	0.9912	0.8947
DTX4:510:01:ENST00000227451	8	UCEC	1	DTX4	510	ENST00000227451	7	11	0.8096	0.8944	0.9383	0.3356	0.1369
PHF20L1:535:01:ENST00000395386	4	UCEC	1	PHF20L1	535	ENST00000395386	4	14	0.8105	0	0.9995	0.397	0.1532
TP53:196:01:ENST00000269305	5	LGG	1	TP53	196	ENST00000269305	5	221	0.8112	1.1607	0.8374	0.6275	0.2973
CNTNAP5:396:06:ENST00000431078	6	SKCM	6	CNTNAP5	396	ENST00000431078	5	36	0.8124	0.906	0.8582	0.1348	0.0079
HRAS:13:01:ENST00000311189	4	BLCA	1	HRAS	13	ENST00000311189	4	13	0.8126	1.2615	0.7793	0.6151	0.2876
CTCF:48:01:ENST00000264010	4	UCEC	1	CTCF	48	ENST00000264010	4	88	0.8147	0	0.9982	0.7723	0.4977
SIGLEC7:124:06:ENST00000317643	4	SKCM	6	SIGLEC7	124	ENST00000317643	4	18	0.8156	0.839	0.8215	0.9267	0.705
CTNNB1:33:01:ENST00000349496	12	LIHC	1	CTNNB1	33	ENST00000349496	12	70	0.8164	1.1022	0.8471	0.6634	0.3465
CIC:1515:01:ENST00000575354	4	LGG	1	CIC	1515	ENST00000575354	4	94	0.8179	0	0.9989	0.9832	0.8579
CHD7:2988:01:ENST00000423902	5	UCEC	1	CHD7	2988	ENST00000423902	4	30	0.8181	1.2631	0.8409	0.3318	0.1077
TP53:242:01:ENST00000269305	5	BRCA	1	TP53	242	ENST00000269305	5	318	0.8188	1.2364	0.8338	1	0.9946
ZNF106:482:01:ENST00000263805	10	UCEC	1	ZNF106	482	ENST00000263805	9	17	0.8188	0	0.9993	0.3334	0.1553
PIGO:731:01:ENST00000378617	5	UCEC	1	PIGO	731	ENST00000378617	4	10	0.8192	0	0.9993	0.4045	0.2087
TP53:132:01:ENST00000269305	5	BRCA	1	TP53	132	ENST00000269305	5	318	0.8203	0.74	0.7658	0.5846	0.2637
ARHGAP22:445:01:ENST00000249601	4	UCEC	1	ARHGAP22	445	ENST00000249601	4	15	0.8204	0	0.9996	0.5582	0.3124
PIK3CA:1047:01:ENST00000263967	17	STAD	1	PIK3CA	1047	ENST00000263967	7	37	0.8211	1.1577	0.8195	0.9985	0.9563
TP53:245:01:ENST00000269305	5	BRCA	1	TP53	245	ENST00000269305	5	318	0.8212	1.2339	0.836	0.9931	0.9038
FAM13B:782:01:ENST00000033079	5	UCEC	1	FAM13B	782	ENST00000033079	5	12	0.8213	0	0.9995	0.859	0.5881
CSMD2:1996:06:ENST00000241312	5	SKCM	6	CSMD2	1996	ENST00000241312	4	82	0.8214	0.7708	0.7983	0.2717	0.1677
ADH1C:5:06:ENST00000515683	4	SKCM	6	ADH1C	5	ENST00000515683	4	19	0.8221	0.8477	0.8365	0.8184	0.4981
TP53:237:01:ENST00000269305	4	LGG	1	TP53	237	ENST00000269305	4	222	0.8226	0.8797	0.8608	0.3337	0.0909
TP53:241:01:ENST00000269305	5	BLCA	1	TP53	241	ENST00000269305	5	176	0.8232	0.8904	0.8437	0.6015	0.2668
NFE2L2:29:01:ENST00000397062	4	HNSC	1	NFE2L2	29	ENST00000397062	4	21	0.8232	1.1881	0.7906	0.9858	0.8634
TP53:179:01:ENST00000269305	8	BRCA	1	TP53	179	ENST00000269305	8	315	0.8257	0	0.9963	0.0001	0.0012
HERC2:1135:01:ENST00000261609	5	UCEC	1	HERC2	1135	ENST00000261609	4	45	0.8261	0	0.999	0.84	0.5731
TP53:205:01:ENST00000269305	4	LUAD	1	TP53	205	ENST00000269305	4	217	0.827	1.3312	0.7775	0.1292	0.102
CTNNB1:41:01:ENST00000349496	5	COAD	1	CTNNB1	41	ENST00000349496	4	17	0.8271	0	0.9992	0.9999	0.9881
DACT1:707:01:ENST00000335867	4	UCEC	1	DACT1	707	ENST00000335867	4	11	0.8278	0	0.9995	0.8895	0.6357
BTBD11:453:01:ENST00000280758	8	UCEC	1	BTBD11	453	ENST00000280758	7	10	0.8281	0	0.9996	0.8224	0.5357
TP53:273:01:ENST00000269305	13	HNSC	1	TP53	273	ENST00000269305	12	304	0.8282	0.9299	0.8518	0.3747	0.1273
APC:1397:01:ENST00000257430	6	COAD	1	APC	1397	ENST00000257430	6	251	0.8292	1.0922	0.9026	0.6771	0.3484
CORIN:262:06:ENST00000273857	6	SKCM	6	CORIN	262	ENST00000273857	5	15	0.8315	1.2955	0.7582	0.6088	0.3474
ARID5B:497:01:ENST00000279873	11	UCEC	1	ARID5B	497	ENST00000279873	11	40	0.8324	1.047	0.9672	0.8856	0.6281
GIMAP8:654:06:ENST00000307271	7	SKCM	6	GIMAP8	654	ENST00000307271	5	22	0.8344	0.8386	0.8232	0.9622	0.7851
AHCTF1:913:01:ENST00000326225	6	UCEC	1	AHCTF1	913	ENST00000326225	4	21	0.8348	0	0.9994	0.5899	0.2769
TP53:337:01:ENST00000269305	6	LUAD	1	TP53	337	ENST00000269305	4	217	0.8381	1.3025	0.7937	0.2611	0.1675
CELSR1:614:01:ENST00000262738	9	UCEC	1	CELSR1	614	ENST00000262738	8	24	0.8389	0.7814	0.8424	0.2494	0.0828
SMAD7:209:01:ENST00000262158	19	UCEC	1	SMAD7	209	ENST00000262158	15	4	0.8395	NA	0.9994	0.4067	0.217
TP53:273:01:ENST00000269305	10	LUAD	1	TP53	273	ENST00000269305	5	216	0.8399	1.1561	0.84	0.9976	0.9464
PCDHB2:204:06:ENST00000194155	4	SKCM	6	PCDHB2	204	ENST00000194155	4	22	0.8399	1.2112	0.805	0.9547	0.7671
APC:1429:01:ENST00000257430	4	COAD	1	APC	1429	ENST00000257430	4	253	0.8407	1.1949	0.8601	0.8566	0.6016
ISX:86:06:ENST00000308700	6	SKCM	6	ISX	86	ENST00000308700	4	5	0.8413	1.291	0.7992	0.9977	0.9458
SYNJ2:1113:01:ENST00000355585	7	UCEC	1	SYNJ2	1113	ENST00000355585	7	9	0.8441	1.1591	0.9064	0.0104	0.0056
SHPRH:166:01:ENST00000275233	9	UCEC	1	SHPRH	166	ENST00000275233	8	22	0.8464	1.3541	0.8068	0.73	0.4147
PLOD3:297:01:ENST00000223127	5	UCEC	1	PLOD3	297	ENST00000223127	4	15	0.8467	0	0.9997	1	0.9945
TP53:163:01:ENST00000269305	4	LUAD	1	TP53	163	ENST00000269305	4	217	0.8468	0.8146	0.8387	0.7938	0.523
TP53:248:01:ENST00000269305	13	HNSC	1	TP53	248	ENST00000269305	13	303	0.8473	0.9267	0.8552	0.9051	0.665
PTEN:127:01:ENST00000371953	6	UCEC	1	PTEN	127	ENST00000371953	5	252	0.8473	1.2595	0.8203	0.9125	0.6594
TMEM200A:431:06:ENST00000296978	6	SKCM	6	TMEM200A	431	ENST00000296978	4	23	0.8474	0.8624	0.8499	0.9836	0.8539
NRAS:12:01:ENST00000369535	5	READ	1	NRAS	12	ENST00000369535	5	6	0.8485	0.9798	0.9885	0.1408	0.0527
NRAS:61:01:ENST00000369535	7	READ	1	NRAS	61	ENST00000369535	5	6	0.8485	1.2247	0.886	0.4531	0.2212
CP:1:01:ENST00000264613	6	UCEC	1	CP	1	ENST00000264613	5	8	0.8485	0.9945	0.9964	0.4695	0.232
UHRF1BP1:1333:01:ENST00000192788	4	UCEC	1	UHRF1BP1	1333	ENST00000192788	4	8	0.8485	0	0.9996	0.016	0.0087
TP53:342:01:ENST00000269305	4	OV	1	TP53	342	ENST00000269305	4	360	0.8505	1.1155	0.8293	0.264	0.0219
PTEN:233:01:ENST00000371953	5	GBM	1	PTEN	233	ENST00000371953	5	103	0.8512	0.9554	0.9293	0.9923	0.8989
CCAR2:417:01:ENST00000308511	5	UCEC	1	CCAR2	417	ENST00000308511	4	12	0.8516	0	0.9996	0.6699	0.375
PXDN:865:01:ENST00000252804	9	UCEC	1	PXDN	865	ENST00000252804	9	24	0.8532	0.8178	0.862	0.7277	0.4152
PLOD3:293:01:ENST00000223127	5	UCEC	1	PLOD3	293	ENST00000223127	5	14	0.8545	0	0.9996	0.571	0.3144
KMT2D:1235:01:ENST00000301067	10	UCEC	1	KMT2D	1235	ENST00000301067	10	87	0.8557	0.6847	0.714	0.9072	0.6534
TP53:175:01:ENST00000269305	5	SARC	1	TP53	175	ENST00000269305	5	77	0.8567	1.1401	0.8578	0.9564	0.7599
RB1:405:01:ENST00000267163	4	BLCA	1	RB1	405	ENST00000267163	4	67	0.857	1.1767	0.8238	0.9534	0.7651
TP53:187:01:ENST00000269305	5	BRCA	1	TP53	187	ENST00000269305	5	318	0.8571	0.767	0.7933	0.6473	0.3176
COL8A1:599:01:ENST00000261037	5	UCEC	1	COL8A1	599	ENST00000261037	5	10	0.8571	0	0.9994	0.9285	0.6969
GUF1:645:01:ENST00000281543	4	UCEC	1	GUF1	645	ENST00000281543	4	6	0.8571	0.7719	0.8332	0.845	0.5566
MBD6:671:01:ENST00000355673	5	UCEC	1	MBD6	671	ENST00000355673	5	16	0.8571	1.6971	0.7085	0.9981	0.9508
SMARCAD1:347:01:ENST00000354268	6	UCEC	1	SMARCAD1	347	ENST00000354268	5	10	0.8571	1.8974	0.6507	0.9383	0.7251
TP53:245:01:ENST00000269305	4	PAAD	1	TP53	245	ENST00000269305	4	108	0.8575	0.9328	0.9065	0.7746	0.4317
FAM21C:516:01:ENST00000374362	5	UCEC	1	FAM21C	516	ENST00000374362	4	12	0.8604	0	0.9996	0.8794	0.5965
PTEN:92:01:ENST00000371953	8	UCEC	1	PTEN	92	ENST00000371953	7	250	0.8611	1.0984	0.9265	0.7978	0.5216
LTBP4:1409:01:ENST00000308370	4	UCEC	1	LTBP4	1409	ENST00000308370	4	13	0.8622	1.2794	0.8408	0.8674	0.6024
TP53:126:01:ENST00000269305	5	LIHC	1	TP53	126	ENST00000269305	5	94	0.8627	0.8842	0.8661	0.5819	0.2597
TP53:179:01:ENST00000269305	4	UCEC	1	TP53	179	ENST00000269305	4	170	0.8631	0.8174	0.8421	0.9699	0.8023
KRAS:146:01:ENST00000256078	13	COAD	1	KRAS	146	ENST00000256078	10	135	0.8635	0.8566	0.8322	0.9578	0.7675
C3orf70:6:01:ENST00000335012	9	BLCA	1	C3orf70	6	ENST00000335012	7	6	0.8636	0.8307	0.8531	0.9718	0.8112
SMAD4:361:01:ENST00000342988	8	STAD	1	SMAD4	361	ENST00000342988	7	22	0.8658	1.1224	0.8634	0.7027	0.3818
DNAH5:920:06:ENST00000265104	7	SKCM	6	DNAH5	920	ENST00000265104	5	151	0.8662	0.9429	0.9098	0.2149	0.0355
NHS:1199:01:ENST00000380060	4	UCEC	1	NHS	1199	ENST00000380060	4	18	0.8673	0	0.9995	0.9032	0.6449
KRAS:12:01:ENST00000256078	136	LUAD	1	KRAS	12	ENST00000256078	118	15	0.8674	1.1044	0.8506	0.7928	0.5085
TP53:282:01:ENST00000269305	5	UCEC	1	TP53	282	ENST00000269305	5	169	0.8679	1.1479	0.8919	0.5282	0.3047
AP3B1:923:01:ENST00000255194	5	UCEC	1	AP3B1	923	ENST00000255194	4	8	0.8687	1.7638	0.6911	0.5903	0.3236
ZCCHC11:58:01:ENST00000371544	6	UCEC	1	ZCCHC11	58	ENST00000371544	4	11	0.8689	0	0.9994	0.9482	0.749
CPNE4:183:06:ENST00000429747	4	SKCM	6	CPNE4	183	ENST00000429747	4	14	0.8693	1.1707	0.8486	0.8584	0.5965
PIK3CA:545:01:ENST00000263967	4	GBM	1	PIK3CA	545	ENST00000263967	4	27	0.8701	0.9361	0.9301	0.013	0.0249
ERBB2:678:01:ENST00000269571	4	STAD	1	ERBB2	678	ENST00000269571	4	11	0.8703	1.1763	0.8518	0.5203	0.2154
TNRC18:1543:01:ENST00000430969	10	UCEC	1	TNRC18	1543	ENST00000430969	9	27	0.873	1.033	0.9793	0.6934	0.3796
KRAS:61:01:ENST00000256078	7	COAD	1	KRAS	61	ENST00000256078	5	140	0.8738	0.8322	0.8566	0.9997	0.9846
VHL:115:01:ENST00000256474	4	KIRC	1	VHL	115	ENST00000256474	4	161	0.8742	0	0.997	0	0.0019
TP53:266:01:ENST00000269305	6	LUSC	1	TP53	266	ENST00000269305	5	362	0.8744	1.1522	0.8424	0.8829	0.6338
PIK3CA:345:01:ENST00000263967	8	UCEC	1	PIK3CA	345	ENST00000263967	8	202	0.8746	1.0285	0.978	0.5433	0.3035
STAG2:593:01:ENST00000371144	5	BLCA	1	STAG2	593	ENST00000371144	5	48	0.8748	0.8753	0.8604	0.774	0.4514
TP53:214:01:ENST00000269305	4	LUSC	1	TP53	214	ENST00000269305	4	363	0.8751	1.2917	0.7991	0.1317	0.104
CDKN2A:110:01:ENST00000304494	5	LUSC	1	CDKN2A	110	ENST00000304494	5	65	0.8755	1.1187	0.8558	0.911	0.6557
BTBD11:1003:01:ENST00000280758	4	STAD	1	BTBD11	1003	ENST00000280758	4	13	0.8773	1.2056	0.8677	0.1124	0.0691
ESRP1:512:01:ENST00000433389	21	UCEC	1	ESRP1	512	ENST00000433389	20	8	0.878	NA	0.9995	0.9554	0.7694
XIRP2:656:06:ENST00000628543	6	SKCM	6	XIRP2	656	ENST00000628543	5	85	0.8786	1.1027	0.8705	0.9133	0.6568
BCORL1:1681:01:ENST00000218147	12	UCEC	1	BCORL1	1681	ENST00000218147	11	25	0.8792	1.1427	0.9139	0.9501	0.7507
CDH6:524:06:ENST00000265071	6	SKCM	6	CDH6	524	ENST00000265071	5	38	0.8795	0.93	0.9085	0.8524	0.5542
HDAC4:902:01:ENST00000345617	7	UCEC	1	HDAC4	902	ENST00000345617	6	14	0.8796	1.1695	0.8986	0.9868	0.8714
OAS2:426:01:ENST00000342315	6	UCEC	1	OAS2	426	ENST00000342315	4	9	0.8811	0	0.9993	0.1224	0.0607
SYT1:180:06:ENST00000261205	5	SKCM	6	SYT1	180	ENST00000261205	5	9	0.8821	0.8713	0.8766	0.4271	0.208
FBXW7:367:01:ENST00000281708	5	COAD	1	FBXW7	367	ENST00000281708	4	41	0.8838	0	0.999	0.108	0.0749
PTEN:132:01:ENST00000371953	4	GBM	1	PTEN	132	ENST00000371953	4	104	0.8843	1.1251	0.819	0.6273	0.1771
CUL1:483:01:ENST00000325222	4	BLCA	1	CUL1	483	ENST00000325222	4	12	0.8846	1.1557	0.8605	0.9989	0.9624
PIK3CA:108:01:ENST00000263967	9	UCEC	1	PIK3CA	108	ENST00000263967	6	204	0.8847	0.8431	0.8683	0.5649	0.2545
SAFB2:945:01:ENST00000252542	4	UCEC	1	SAFB2	945	ENST00000252542	4	7	0.8848	1.2247	0.8866	0.3754	0.1328
KMT2D:2354:01:ENST00000301067	10	UCEC	1	KMT2D	2354	ENST00000301067	10	87	0.8855	0.7145	0.7451	0.5695	0.3145
ZNF28:260:01:ENST00000457749	4	OV	1	ZNF28	260	ENST00000457749	4	4	0.8857	1.1646	0.8958	0.8032	0.5052
ASXL3:876:01:ENST00000269197	4	UCEC	1	ASXL3	876	ENST00000269197	4	25	0.8866	1.2608	0.841	0.9682	0.796
TP53:135:01:ENST00000269305	4	LUSC	1	TP53	135	ENST00000269305	4	363	0.8871	1.2578	0.8195	0.1726	0.1248
PPP1R26:898:01:ENST00000356818	7	COAD	1	PPP1R26	898	ENST00000356818	4	5	0.8889	0	0.9996	0.2595	0.0936
EAPP:125:01:ENST00000250454	6	UCEC	1	EAPP	125	ENST00000250454	5	4	0.8889	NA	0.9996	0.89	0.6291
SOX7:257:01:ENST00000304501	4	UCEC	1	SOX7	257	ENST00000304501	4	5	0.8889	0	0.9996	0.3242	0.1415
PCDH15:1522:06:ENST00000617271	4	SKCM	6	PCDH15	1522	ENST00000617271	4	71	0.8893	0.8458	0.8698	0.2735	0.1687
NFASC:165:01:ENST00000339876	12	COAD	1	NFASC	165	ENST00000339876	7	20	0.89	NA	NA	0.6886	0.4028
ASTN1:502:06:ENST00000361833	7	SKCM	6	ASTN1	502	ENST00000361833	4	30	0.8904	1.152	0.8539	0.7032	0.3603
LMTK3:1199:01:ENST00000600059	5	UCEC	1	LMTK3	1199	ENST00000600059	4	7	0.8909	NA	NA	0.1037	0.0526
UBR5:2121:01:ENST00000520539	25	STAD	1	UBR5	2121	ENST00000520539	8	9	0.8926	0.9048	0.8892	0.9415	0.729
SPOP:133:01:ENST00000347630	19	PRAD	1	SPOP	133	ENST00000347630	19	36	0.8933	0	0.9994	0.9993	0.9703
NES:393:01:ENST00000368223	6	UCEC	1	NES	393	ENST00000368223	5	12	0.8937	1.7321	0.6984	0.6464	0.3321
TP53:135:01:ENST00000269305	7	ESCA	1	TP53	135	ENST00000269305	7	138	0.894	0.9332	0.9074	0.9247	0.6813
TP53:225:01:ENST00000269305	5	BRCA	1	TP53	225	ENST00000269305	5	318	0.8942	1.1069	0.9201	0.9627	0.779
PRPF8:1832:01:ENST00000304992	4	UCEC	1	PRPF8	1832	ENST00000304992	4	19	0.8958	0	0.9995	0.9943	0.9147
CIC:1512:01:ENST00000575354	6	LGG	1	CIC	1512	ENST00000575354	6	92	0.8959	0	0.9988	0.0708	0.0501
CTCF:204:01:ENST00000264010	29	UCEC	1	CTCF	204	ENST00000264010	27	65	0.8963	0.8938	0.8684	0.8692	0.5937
ERBB2:842:01:ENST00000269571	6	UCEC	1	ERBB2	842	ENST00000269571	5	12	0.8969	1.1673	0.8997	0.8825	0.6246
OR11H1:79:06:ENST00000252835	9	SKCM	6	OR11H1	79	ENST00000252835	4	8	0.897	1.1202	0.8982	0.8148	0.5379
TP53:282:01:ENST00000269305	6	LUSC	1	TP53	282	ENST00000269305	6	361	0.8974	1.087	0.8863	0.9722	0.8077
ARID1A:1326:01:ENST00000324856	5	UCEC	1	ARID1A	1326	ENST00000324856	5	180	0.8974	0	0.9973	0.5338	0.3045
MYO1A:1033:01:ENST00000300119	9	UCEC	1	MYO1A	1033	ENST00000300119	7	10	0.8991	1.1952	0.9	0.9803	0.8424
MYLK:427:06:ENST00000360304	4	SKCM	6	MYLK	427	ENST00000360304	4	25	0.9005	1.1409	0.9023	0.0695	0.0575
MBD6:734:01:ENST00000355673	7	UCEC	1	MBD6	734	ENST00000355673	5	16	0.9005	0	0.9994	0.1892	0.0982
KRAS:12:01:ENST00000256078	7	CESC	1	KRAS	12	ENST00000256078	7	7	0.9009	1.134	0.8917	0.0587	0.0178
PTEN:173:01:ENST00000371953	5	GBM	1	PTEN	173	ENST00000371953	4	104	0.9018	1.118	0.8288	0.601	0.1591
YLPM1:254:01:ENST00000325680	6	COAD	1	YLPM1	254	ENST00000325680	4	11	0.9026	0	0.9995	0.8226	0.5411
TP53:273:01:ENST00000269305	9	ESCA	1	TP53	273	ENST00000269305	9	136	0.903	0.9449	0.913	0.8572	0.563
PIK3CA:1043:01:ENST00000263967	10	UCEC	1	PIK3CA	1043	ENST00000263967	7	203	0.903	0.8526	0.8768	0.5343	0.2307
KMT2B:1879:01:ENST00000420124	5	UCEC	1	KMT2B	1879	ENST00000420124	4	72	0.9035	0	0.9987	0.9737	0.8212
VHL:130:01:ENST00000256474	4	KIRC	1	VHL	130	ENST00000256474	4	161	0.9036	1.0879	0.9339	0.9077	0.6737
TP53:152:01:ENST00000269305	4	LUAD	1	TP53	152	ENST00000269305	4	217	0.9038	1.1589	0.8839	0.4138	0.2457
YLPM1:147:01:ENST00000325680	4	UCEC	1	YLPM1	147	ENST00000325680	4	22	0.905	0	0.9992	0.1104	0.067
TP53:298:01:ENST00000269305	5	LUSC	1	TP53	298	ENST00000269305	4	363	0.9059	0.9348	0.9251	0.738	0.3996
PIK3R1:376:01:ENST00000521381	6	GBM	1	PIK3R1	376	ENST00000521381	4	26	0.906	1.1152	0.8447	0.6182	0.1863
TP53:157:01:ENST00000269305	15	LUSC	1	TP53	157	ENST00000269305	14	353	0.9061	1.0584	0.8917	0.9544	0.765
PHF14:182:01:ENST00000403050	6	UCEC	1	PHF14	182	ENST00000403050	6	10	0.9071	0.8006	0.8584	0.6643	0.3749
PIK3CA:420:01:ENST00000263967	5	BRCA	1	PIK3CA	420	ENST00000263967	5	298	0.9073	0	0.9967	0.0007	0.0055
PIK3CA:1047:01:ENST00000263967	133	BRCA	1	PIK3CA	1047	ENST00000263967	129	174	0.9086	1.039	0.9074	0.9454	0.7428
ARID1A:1850:01:ENST00000324856	15	STAD	1	ARID1A	1850	ENST00000324856	10	59	0.9086	0.945	0.9097	0.1731	0.0414
ANKRD26:1234:01:ENST00000376087	5	UCEC	1	ANKRD26	1234	ENST00000376087	4	19	0.9113	0.9047	0.9289	0.8788	0.6009
NFE2L2:30:01:ENST00000397062	4	LUSC	1	NFE2L2	30	ENST00000397062	4	67	0.9116	1.1489	0.8932	0.3549	0.2099
CDKN2A:80:01:ENST00000304494	6	PAAD	1	CDKN2A	80	ENST00000304494	6	22	0.9117	1.0915	0.8779	0.7716	0.4981
TMC2:430:06:ENST00000358864	5	SKCM	6	TMC2	430	ENST00000358864	4	13	0.9126	0.9266	0.9279	0.9612	0.7818
BRAF:466:01:ENST00000288602	6	LUAD	1	BRAF	466	ENST00000288602	4	30	0.9137	0.9109	0.9058	0.2902	0.0723
OR51E2:156:01:ENST00000396950	7	UCEC	1	OR51E2	156	ENST00000396950	5	8	0.9138	0	0.9996	0.6002	0.3034
ADAMTS3:328:01:ENST00000286657	9	UCEC	1	ADAMTS3	328	ENST00000286657	6	18	0.9141	0	0.9993	0.7075	0.4196
ALG13:290:01:ENST00000394780	5	UCEC	1	ALG13	290	ENST00000394780	5	24	0.9143	0	0.9993	0.9724	0.8154
FBXW7:465:01:ENST00000281708	6	CESC	1	FBXW7	465	ENST00000281708	5	20	0.9155	0.8474	0.881	0.669	0.3973
DOCK3:1852:01:ENST00000266037	28	STAD	1	DOCK3	1852	ENST00000266037	7	11	0.9176	0.9221	0.9121	0.6137	0.3304
FBXW7:505:01:ENST00000281708	7	HNSC	1	FBXW7	505	ENST00000281708	7	23	0.9188	0.9184	0.8968	0.9051	0.6623
DOCK3:1852:01:ENST00000266037	31	UCEC	1	DOCK3	1852	ENST00000266037	28	14	0.9195	1.1085	0.912	0.1367	0.0419
GLI1:274:01:ENST00000228682	6	UCEC	1	GLI1	274	ENST00000228682	5	8	0.92	1.1547	0.9192	0.9845	0.8601
NAA15:614:01:ENST00000296543	4	UCEC	1	NAA15	614	ENST00000296543	4	9	0.9203	2	0.624	0.1212	0.0266
GUCA1C:39:06:ENST00000261047	4	SKCM	6	GUCA1C	39	ENST00000261047	4	5	0.9206	1.075	0.9372	0.8975	0.6379
GRM7:786:06:ENST00000357716	7	SKCM	6	GRM7	786	ENST00000357716	4	27	0.9208	1.0916	0.8942	0.321	0.0424
PIK3CA:545:01:ENST00000263967	5	UCS	1	PIK3CA	545	ENST00000263967	5	13	0.9218	0.9506	0.9337	0.3092	0.055
SLCO5A1:222:01:ENST00000260126	4	UCEC	1	SLCO5A1	222	ENST00000260126	4	11	0.9231	1.339	0.8121	0.9161	0.6807
TRIM51:144:01:ENST00000449290	11	STAD	1	TRIM51	144	ENST00000449290	4	6	0.9238	1.2953	0.7965	0.6418	0.3249
EML4:130:01:ENST00000318522	6	UCEC	1	EML4	130	ENST00000318522	4	6	0.9238	0	0.9996	0.9264	0.6938
SRRT:105:01:ENST00000611405	5	UCEC	1	SRRT	105	ENST00000611405	4	17	0.924	1.1128	0.9264	0.9238	0.6842
TP53:213:01:ENST00000269305	11	HNSC	1	TP53	213	ENST00000269305	11	305	0.9242	1.0448	0.9169	0.623	0.3033
KDM6A:1293:01:ENST00000377967	4	BLCA	1	KDM6A	1293	ENST00000377967	4	94	0.9264	0.8857	0.9048	0.1537	0.1119
BRINP3:497:06:ENST00000367462	5	SKCM	6	BRINP3	497	ENST00000367462	4	34	0.9284	1.1401	0.8615	0.8208	0.5559
PIK3CA:545:01:ENST00000263967	37	CESC	1	PIK3CA	545	ENST00000263967	29	31	0.9285	0.9558	0.9276	0.5442	0.2724
CDC7:31:01:ENST00000234626	6	UCEC	1	CDC7	31	ENST00000234626	6	10	0.9286	1.6432	0.7257	0.7667	0.4758
CASP8:465:01:ENST00000432109	4	HNSC	1	CASP8	465	ENST00000432109	4	41	0.9293	1.0778	0.9203	0.9995	0.9758
PXDNL:925:06:ENST00000356297	6	SKCM	6	PXDNL	925	ENST00000356297	4	42	0.9296	1.139	0.9008	0.0098	0.0218
CDKN2A:80:01:ENST00000304494	20	HNSC	1	CDKN2A	80	ENST00000304494	19	72	0.9326	1.0331	0.9275	0.5177	0.2342
OR6K2:304:01:ENST00000359610	5	COAD	1	OR6K2	304	ENST00000359610	4	7	0.9333	1.2247	0.8866	0.7935	0.4939
CXCR2:322:06:ENST00000318507	5	SKCM	6	CXCR2	322	ENST00000318507	4	7	0.9333	1.1108	0.9059	0.9725	0.8101
XYLT2:529:01:ENST00000017003	32	STAD	1	XYLT2	529	ENST00000017003	8	6	0.9344	1.076	0.9324	0.5107	0.2387
JAK1:430:01:ENST00000342505	5	UCEC	1	JAK1	430	ENST00000342505	5	54	0.9353	1.2128	0.8569	0.6673	0.3419
PLEKHA6:328:01:ENST00000272203	15	UCEC	1	PLEKHA6	328	ENST00000272203	13	13	0.9356	1.2894	0.8368	0.2228	0.084
CAMSAP2:1437:01:ENST00000236925	7	COAD	1	CAMSAP2	1437	ENST00000236925	4	8	0.9374	0	0.9995	0.2182	0.1069
TP53:110:01:ENST00000269305	5	BRCA	1	TP53	110	ENST00000269305	5	318	0.9383	0.8487	0.8713	0.7511	0.4254
ERBB3:104:01:ENST00000267101	4	BLCA	1	ERBB3	104	ENST00000267101	4	34	0.9387	0.9046	0.9232	0.052	0.0509
MET:1250:01:ENST00000397752	4	KIRP	1	MET	1250	ENST00000397752	4	16	0.9391	1.1285	0.9222	0.8914	0.6228
LMAN1:275:01:ENST00000251047	4	UCEC	1	LMAN1	275	ENST00000251047	4	15	0.9391	0	0.9995	0.6963	0.4176
MET:1010:01:ENST00000397752	5	LUAD	1	MET	1010	ENST00000397752	4	9	0.9399	1.2498	0.8558	0.5085	0.2741
OR2T12:210:06:ENST00000317996	6	SKCM	6	OR2T12	210	ENST00000317996	5	11	0.9414	0.9436	0.9438	0.9978	0.9467
BRAF:469:01:ENST00000288602	8	LUAD	1	BRAF	469	ENST00000288602	7	27	0.9417	0.9459	0.9341	0.747	0.4305
FUBP1:11:01:ENST00000370768	5	UCEC	1	FUBP1	11	ENST00000370768	4	9	0.9427	0.7648	0.8165	0.9312	0.7002
NFE2L2:34:01:ENST00000397062	6	UCEC	1	NFE2L2	34	ENST00000397062	6	21	0.9443	1.1059	0.9306	0.9981	0.9501
MYT1L:474:06:ENST00000399161	4	SKCM	6	MYT1L	474	ENST00000399161	4	31	0.946	1.1067	0.894	0.9416	0.7375
TP53:248:01:ENST00000269305	9	STAD	1	TP53	248	ENST00000269305	7	169	0.9473	1.0406	0.9559	0.5025	0.2838
LMAN1:305:01:ENST00000251047	11	UCEC	1	LMAN1	305	ENST00000251047	10	9	0.9474	NA	0.9996	0.8437	0.5625
ARID1A:1072:01:ENST00000324856	7	UCEC	1	ARID1A	1072	ENST00000324856	7	178	0.9478	0	0.9974	0.2921	0.1561
LRRC41:134:01:ENST00000343304	4	COAD	1	LRRC41	134	ENST00000343304	4	9	0.9483	1.0607	0.969	0.7637	0.4545
PTPRT:1075:01:ENST00000373187	6	COAD	1	PTPRT	1075	ENST00000373187	4	24	0.9483	0	0.9994	0.2526	0.1417
PLCB4:876:06:ENST00000278655	4	SKCM	6	PLCB4	876	ENST00000278655	4	53	0.9486	1.0502	0.9474	0.9148	0.6604
MIS18BP1:690:01:ENST00000310806	4	UCEC	1	MIS18BP1	690	ENST00000310806	4	12	0.9505	0	0.9997	0.992	0.8998
TP53:136:01:ENST00000269305	5	HNSC	1	TP53	136	ENST00000269305	5	311	0.9512	1.0379	0.9492	0.9725	0.8078
SLC12A5:332:06:ENST00000454036	7	SKCM	6	SLC12A5	332	ENST00000454036	5	16	0.9515	1.0461	0.9553	0.8479	0.5777
ARID4B:939:01:ENST00000264183	6	STAD	1	ARID4B	939	ENST00000264183	4	5	0.9524	1.1451	0.8829	0.3214	0.0663
BRSK1:379:01:ENST00000309383	8	UCEC	1	BRSK1	379	ENST00000309383	6	10	0.9528	0	0.9996	0.839	0.5587
KLF3:226:01:ENST00000261438	7	UCEC	1	KLF3	226	ENST00000261438	6	12	0.9528	0	0.9996	0.9855	0.8639
TP53:213:01:ENST00000269305	4	PAAD	1	TP53	213	ENST00000269305	4	108	0.9542	0.9906	0.9895	0.7107	0.4541
TP53:248:01:ENST00000269305	5	PRAD	1	TP53	248	ENST00000269305	5	52	0.9561	0	0.9993	0.9603	0.7799
RP1:1055:06:ENST00000220676	5	SKCM	6	RP1	1055	ENST00000220676	4	101	0.9572	1.0564	0.9395	0.9492	0.7388
PIK3CA:545:01:ENST00000263967	24	HNSC	1	PIK3CA	545	ENST00000263967	22	58	0.9574	0.9839	0.9618	0.1409	0.039
PIK3R1:376:01:ENST00000521381	4	UCEC	1	PIK3R1	376	ENST00000521381	4	124	0.9581	0.9352	0.9476	0.8669	0.5757
PPP1R10:939:01:ENST00000376511	4	UCEC	1	PPP1R10	939	ENST00000376511	4	14	0.9582	0.9388	0.9566	0.6	0.2841
NOVA1:34:01:ENST00000539517	5	UCEC	1	NOVA1	34	ENST00000539517	4	10	0.959	NA	NA	0.0002	0.0002
TP53:337:01:ENST00000269305	5	HNSC	1	TP53	337	ENST00000269305	5	311	0.9604	0.9662	0.9615	0.7229	0.458
CTNNB1:37:01:ENST00000349496	6	LIHC	1	CTNNB1	37	ENST00000349496	5	77	0.9607	1.0148	0.9886	0.2514	0.1492
ATXN2L:1002:01:ENST00000336783	10	UCEC	1	ATXN2L	1002	ENST00000336783	8	7	0.9613	0.8165	0.8866	0.5846	0.302
CTNNB1:387:01:ENST00000349496	5	LIHC	1	CTNNB1	387	ENST00000349496	5	77	0.962	0.8936	0.9127	0.4238	0.2392
TP53:220:01:ENST00000269305	8	OV	1	TP53	220	ENST00000269305	8	356	0.9626	1.0029	0.9949	0.9582	0.764
TP53:285:01:ENST00000269305	10	BLCA	1	TP53	285	ENST00000269305	10	171	0.963	1.0271	0.9584	0.5666	0.321
THSD7B:1180:06:ENST00000272643	8	SKCM	6	THSD7B	1180	ENST00000272643	5	81	0.9644	1.0401	0.9482	0.7962	0.4719
CHRM3:567:01:ENST00000255380	5	UCEC	1	CHRM3	567	ENST00000255380	4	9	0.965	1.4907	0.778	0.7252	0.4036
PIK3CA:545:01:ENST00000263967	69	BRCA	1	PIK3CA	545	ENST00000263967	60	243	0.9676	0.9725	0.9502	0.1879	0.0759
GATA3:330:01:ENST00000346208	6	BRCA	1	GATA3	330	ENST00000346208	6	117	0.968	0.9592	0.968	0.9975	0.9422
PER3:316:06:ENST00000361923	5	SKCM	6	PER3	316	ENST00000361923	4	5	0.9683	1.1362	0.8986	0.5536	0.2675
PIK3CA:546:01:ENST00000263967	19	UCEC	1	PIK3CA	546	ENST00000263967	18	192	0.9683	0.9912	0.9884	0.9877	0.876
CHD9:760:01:ENST00000398510	5	UCEC	1	CHD9	760	ENST00000398510	4	20	0.9691	0	0.9993	0.7413	0.4611
MUC4:3516:01:ENST00000463781	6	KIRP	1	MUC4	3516	ENST00000463781	6	7	0.972	NA	NA	0.3057	0.1206
ADAMTS9:1029:01:ENST00000498707	6	UCEC	1	ADAMTS9	1029	ENST00000498707	4	17	0.9724	0	0.9992	0.2338	0.1276
KRAS:12:01:ENST00000256078	40	READ	1	KRAS	12	ENST00000256078	34	14	0.9727	1.0057	0.9946	0.9408	0.7301
PIK3CA:1047:01:ENST00000263967	4	ESCA	1	PIK3CA	1047	ENST00000263967	4	11	0.9744	0.9491	0.9525	0.9478	0.7395
OSBPL6:109:01:ENST00000190611	4	UCEC	1	OSBPL6	109	ENST00000190611	4	11	0.9744	0	0.9994	0.0496	0.0309
PIK3CA:118:01:ENST00000263967	4	LGG	1	PIK3CA	118	ENST00000263967	4	32	0.9754	0.8867	0.9089	0.9695	0.8
AHR:383:01:ENST00000242057	8	BLCA	1	AHR	383	ENST00000242057	7	13	0.9774	0.978	0.9789	0.4488	0.2219
CTNNB1:37:01:ENST00000349496	4	STAD	1	CTNNB1	37	ENST00000349496	4	16	0.9783	1.1192	0.9224	0.2899	0.09
CTNNB1:45:01:ENST00000349496	7	COAD	1	CTNNB1	45	ENST00000349496	5	16	0.9795	1.2865	0.8379	0.9736	0.819
MAP2:1474:01:ENST00000360351	8	UCEC	1	MAP2	1474	ENST00000360351	7	18	0.98	0	0.9994	0.7261	0.4351
MUC16:11642:01:ENST00000397910	10	UCEC	1	MUC16	11642	ENST00000397910	5	101	0.9803	0	0.9983	0.5545	0.2453
TP53:176:01:ENST00000269305	6	BRCA	1	TP53	176	ENST00000269305	6	317	0.9815	0.9829	0.9864	0.9984	0.9572
SLC12A1:877:01:ENST00000380993	4	UCEC	1	SLC12A1	877	ENST00000380993	4	13	0.9815	0	0.9996	0.1708	0.0925
TP53:238:01:ENST00000269305	4	BRCA	1	TP53	238	ENST00000269305	4	319	0.9816	0	0.9971	0.0309	0.0391
DAZAP1:257:01:ENST00000233078	14	UCEC	1	DAZAP1	257	ENST00000233078	13	7	0.9816	NA	0.9996	0.2799	0.1241
SMAD4:361:01:ENST00000342988	4	READ	1	SMAD4	361	ENST00000342988	4	17	0.9821	0.9751	0.9826	0.9311	0.6999
TET1:1387:01:ENST00000373644	5	UCEC	1	TET1	1387	ENST00000373644	5	19	0.9822	0	0.9996	0.8489	0.5538
TP53:273:01:ENST00000269305	20	BRCA	1	TP53	273	ENST00000269305	20	303	0.9824	0.9727	0.9576	0.5844	0.2824
KIAA1429:721:01:ENST00000297591	9	UCEC	1	KIAA1429	721	ENST00000297591	7	12	0.9836	1.3887	0.8165	0.1942	0.0595
FCRL3:272:01:ENST00000368184	6	UCEC	1	FCRL3	272	ENST00000368184	5	12	0.9842	1.3693	0.8243	0.8021	0.4986
MDN1:1989:01:ENST00000369393	7	UCEC	1	MDN1	1989	ENST00000369393	5	41	0.9849	0.9649	0.9733	0.9279	0.6918
PIK3CA:1047:01:ENST00000263967	6	LGG	1	PIK3CA	1047	ENST00000263967	6	30	0.9852	1.0006	0.9994	0.6026	0.2863
MED12:521:01:ENST00000374080	6	UCEC	1	MED12	521	ENST00000374080	5	42	0.9852	0	0.9996	0.4834	0.2675
TP53:159:01:ENST00000269305	4	LUSC	1	TP53	159	ENST00000269305	4	363	0.9864	0.9943	0.9955	0.1935	0.1347
ABCB1:467:01:ENST00000265724	4	UCEC	1	ABCB1	467	ENST00000265724	4	16	0.9866	1.12	0.922	0.7603	0.4813
PCDHB12:61:06:ENST00000239450	4	SKCM	6	PCDHB12	61	ENST00000239450	4	18	0.9881	1.0753	0.9114	0.9664	0.7996
FUT9:7:06:ENST00000302103	4	SKCM	6	FUT9	7	ENST00000302103	4	22	0.9885	1.0559	0.9439	0.5664	0.3351
NRD1:206:01:ENST00000354831	5	UCEC	1	NRD1	206	ENST00000354831	5	7	0.9899	1.2247	0.8866	0.9718	0.8119
PIK3R1:564:01:ENST00000521381	6	UCEC	1	PIK3R1	564	ENST00000521381	6	122	0.99	0.9346	0.9268	0.1466	0.0286
TP53:273:01:ENST00000269305	16	STAD	1	TP53	273	ENST00000269305	11	165	0.9901	0.9923	0.9868	0.5214	0.2246
XRN1:1611:01:ENST00000264951	5	COAD	1	XRN1	1611	ENST00000264951	4	10	0.991	1.5811	0.7523	0.3118	0.1076
COL11A1:546:01:ENST00000370096	6	UCEC	1	COL11A1	546	ENST00000370096	5	33	0.9913	0.9546	0.9649	0.4137	0.2278
CCT8L2:552:01:ENST00000359963	6	UCEC	1	CCT8L2	552	ENST00000359963	4	13	0.9924	0	0.9995	0.9984	0.9554
WDR87:2720:01:ENST00000303868	5	UCEC	1	WDR87	2720	ENST00000303868	5	36	0.9934	0	0.9991	0.1897	0.105
CELSR3:356:01:ENST00000164024	5	BLCA	1	CELSR3	356	ENST00000164024	4	16	0.9965	0.9556	0.9665	0.3039	0.1694
TRIM51:144:01:ENST00000449290	12	UCEC	1	TRIM51	144	ENST00000449290	8	12	0.9965	1.311	0.8482	0.8544	0.5793
ATRX:1426:01:ENST00000373344	6	LGG	1	ATRX	1426	ENST00000373344	6	159	0.9968	1.022	0.983	0.8503	0.586
SETD1B:8:01:ENST00000604567	50	UCEC	1	SETD1B	8	ENST00000604567	44	22	0.9977	1.0226	0.9795	0.9117	0.6701
EPPK1:2015:01:ENST00000615648	5	UCEC	1	EPPK1	2015	ENST00000615648	4	22	0.998	0	0.9994	0.615	0.3555
MPRIP:353:01:ENST00000341712	6	UCEC	1	MPRIP	353	ENST00000341712	4	8	0.998	NA	NA	0.0378	0.0211
CLVS1:171:01:ENST00000325897	4	SKCM	1	CLVS1	171	ENST00000325897	4	4	1	NA	0.9996	0.7017	0.412
PRKG2:143:06:ENST00000264399	5	SKCM	6	PRKG2	143	ENST00000264399	4	6	1	1.0158	0.9864	0.9361	0.7182
EPB41L5:268:01:ENST00000263713	4	UCEC	1	EPB41L5	268	ENST00000263713	4	4	1	1.1547	0.9192	0.5536	0.2675
NOP58:524:01:ENST00000264279	4	UCEC	1	NOP58	524	ENST00000264279	4	6	1	1.291	0.8567	0.2449	0.1004
NUCB2:400:01:ENST00000529010	7	UCEC	1	NUCB2	400	ENST00000529010	4	4	1	NA	0.9996	0.4942	0.2494
SLC16A4:475:01:ENST00000369779	6	UCEC	1	SLC16A4	475	ENST00000369779	4	4	1	NA	0.9996	0.7476	0.4481
TBX2:138:01:ENST00000240328	4	UCEC	1	TBX2	138	ENST00000240328	4	6	1	1.4434	0.7958	0.3529	0.146
