# Supplementary material for: The Impact of Mutational Hotspots on Cancer Survival
Source: Cancers (Basel). 2024 Mar 6;16(5):1072. doi: 10.3390/cancers16051072 (PMC10931094; doi:10.3390/cancers16051072)
Supplement: Supplementary file 1 [file cancers-16-01072-s001.zip › supplementary Table S3 - HotSpot X vs. Other HS.xlsx]

## Sheet: Hotspot X vs Other HS
Hotspot ID	TCGA Mutated Samples	Cancer	Site	Gene	Position	Transcript	n With HotSpot	n Without HotSpot	p Valorate	Hazard Ratio	p Hazard Ratio	p Log Rank	p Cox PH
BRAF:600:06:ENST00000288602	177	SKCM	6	BRAF	600	ENST00000288602	141	6	0.0357	0.2964	0.0099	0.9918	0.8956
KRAS:12:01:ENST00000256078	67	UCEC	1	KRAS	12	ENST00000256078	65	17	0.0493	NA	0.9984	0.9245	0.6948
EGFR:858:01:ENST00000275493	23	LUAD	1	EGFR	858	ENST00000275493	21	15	0.0034	5.0201	0.0135	0.9923	0.8939
CTNNB1:37:01:ENST00000349496	21	UCEC	1	CTNNB1	37	ENST00000349496	19	69	0.0404	3.8464	0.0335	0.8849	0.6154
EGFR:746:01:ENST00000275493	17	LUAD	1	EGFR	746	ENST00000275493	15	21	0.0036	0.1992	0.0135	0.9923	0.8939
NFE2L2:29:01:ENST00000397062	14	LUSC	1	NFE2L2	29	ENST00000397062	14	35	0.0453	2.8178	0.0388	0.9199	0.6781
TP53:248:01:ENST00000269305	14	LGG	1	TP53	248	ENST00000269305	14	128	0.0382	0.3172	0.1167	0.7032	0.3861
PIK3CA:38:01:ENST00000263967	12	UCEC	1	PIK3CA	38	ENST00000263967	10	172	0.0254	3.9188	0.0146	0.2205	0.0572
TP53:193:01:ENST00000269305	9	HNSC	1	TP53	193	ENST00000269305	9	176	0.0356	2.7362	0.0109	0.9888	0.8779
APC:876:01:ENST00000257430	10	READ	1	APC	876	ENST00000257430	8	17	0.0449	0	0.9993	0.7766	0.4746
TP53:196:01:ENST00000269305	8	BRCA	1	TP53	196	ENST00000269305	8	185	0.0036	0	0.997	0.4316	0.1663
TP53:306:01:ENST00000269305	6	HNSC	1	TP53	306	ENST00000269305	6	179	0.0239	4.1944	0.0021	0.7458	0.5036
TP53:126:01:ENST00000269305	6	LUSC	1	TP53	126	ENST00000269305	6	222	0.0383	4.6889	0.0028	0.7482	0.4838
NFE2L2:79:01:ENST00000397062	5	HNSC	1	NFE2L2	79	ENST00000397062	5	4	0.0476	2.6054	0.26	1	1
FBXW7:505:01:ENST00000281708	6	COAD	1	FBXW7	505	ENST00000281708	5	24	0.0408	4.6351	0.0986	0.3121	0.0934
ARID1A:1989:01:ENST00000324856	20	UCEC	1	ARID1A	1989	ENST00000324856	5	72	0.041	0	0.9986	0.4527	0.1779
TP53:266:01:ENST00000269305	6	OV	1	TP53	266	ENST00000269305	5	211	0.0167	3.2061	0.0116	0.4906	0.0932
TP53:179:01:ENST00000269305	5	OV	1	TP53	179	ENST00000269305	5	211	0.02	0.1888	0.0972	0.9675	0.8021
TP53:244:01:ENST00000269305	5	OV	1	TP53	244	ENST00000269305	5	211	0.0303	0.2002	0.1099	0.9867	0.868
TP53:176:01:ENST00000269305	5	LUSC	1	TP53	176	ENST00000269305	5	223	0.0042	4.3694	0.0015	0.453	0.0766
NFE2L2:29:01:ENST00000397062	4	HNSC	1	NFE2L2	29	ENST00000397062	4	5	0.0476	0.3838	0.26	1	1
TTN:20780:06:ENST00000591111	5	SKCM	6	TTN	20780	ENST00000591111	4	24	0.0046	0	0.998	1	0.9928
TP53:238:01:ENST00000269305	4	GBM	1	TP53	238	ENST00000269305	4	44	0.0421	3.8037	0.0195	0.7671	0.3135
FBXW7:545:01:ENST00000281708	4	UCEC	1	FBXW7	545	ENST00000281708	4	47	0.045	8.3189	0.0211	0.4291	0.2633
TP53:159:01:ENST00000269305	4	LUAD	1	TP53	159	ENST00000269305	4	82	0.0186	3.1205	0.0364	0.2564	0.0214
TP53:132:01:ENST00000269305	5	COAD	1	TP53	132	ENST00000269305	4	97	0.0288	5.3939	0.0079	0.6282	0.2743
APC:1489:01:ENST00000257430	4	COAD	1	APC	1489	ENST00000257430	4	129	0.0417	0	0.9965	0.3962	0.1359
TP53:125:01:ENST00000269305	4	LGG	1	TP53	125	ENST00000269305	4	138	0.0207	4.7085	0.0123	0.6846	0.3274
TP53:280:01:ENST00000269305	4	LUSC	1	TP53	280	ENST00000269305	4	224	0.0318	7.5921	0.0007	0.7344	0.4969
TP53:175:01:ENST00000269305	11	ESCA	1	TP53	175	ENST00000269305	11	53	0.0512	0.2859	0.0904	0.7499	0.4623
RP1:1118:06:ENST00000220676	4	SKCM	6	RP1	1118	ENST00000220676	4	11	0.0513	0	0.9991	0.8644	0.5867
TP53:273:01:ENST00000269305	7	GBM	1	TP53	273	ENST00000269305	6	42	0.0524	0.1767	0.0914	0.4092	0.2221
TP53:175:01:ENST00000269305	27	COAD	1	TP53	175	ENST00000269305	22	79	0.0536	0.3442	0.0985	0.1038	0.0268
TP53:220:01:ENST00000269305	5	LUSC	1	TP53	220	ENST00000269305	5	223	0.0558	3.0778	0.0287	0.7806	0.4366
PIK3CA:111:01:ENST00000263967	5	UCEC	1	PIK3CA	111	ENST00000263967	4	178	0.056	0	0.9976	0.7237	0.3938
RP1:1282:06:ENST00000220676	4	SKCM	6	RP1	1282	ENST00000220676	4	11	0.0586	6.2958	0.0487	0.4566	0.2782
TP53:234:01:ENST00000269305	9	LUSC	1	TP53	234	ENST00000269305	9	219	0.0619	1.842	0.1012	0.0852	0.0061
TP53:249:01:ENST00000269305	7	LUSC	1	TP53	249	ENST00000269305	7	221	0.0633	0.2337	0.1488	0.7176	0.3913
APC:213:01:ENST00000257430	6	READ	1	APC	213	ENST00000257430	6	19	0.0657	8.6059	0.0809	0.994	0.918
KRAS:61:01:ENST00000256078	8	PAAD	1	KRAS	61	ENST00000256078	7	128	0.0671	2.4667	0.0363	0.9469	0.7288
KRAS:12:01:ENST00000256078	131	PAAD	1	KRAS	12	ENST00000256078	128	7	0.0673	0.4054	0.0363	0.9469	0.7288
TTK:854:01:ENST00000369798	8	UCEC	1	TTK	854	ENST00000369798	8	8	0.0685	NA	0.9994	0.2097	0.0869
TP53:249:01:ENST00000269305	10	LIHC	1	TP53	249	ENST00000269305	10	10	0.07	3.971	0.0942	0.9837	0.8568
TP53:245:01:ENST00000269305	4	BLCA	1	TP53	245	ENST00000269305	4	87	0.0724	0.2717	0.199	0.8524	0.5554
TP53:248:01:ENST00000269305	23	BLCA	1	TP53	248	ENST00000269305	22	69	0.0759	1.8948	0.0557	0.9286	0.6961
ARID1A:1850:01:ENST00000324856	18	UCEC	1	ARID1A	1850	ENST00000324856	17	60	0.0759	4.4005	0.0715	0.3872	0.1867
PTEN:7:01:ENST00000371953	8	UCEC	1	PTEN	7	ENST00000371953	4	161	0.0766	0	0.9977	0.5261	0.2206
TP53:248:01:ENST00000269305	21	OV	1	TP53	248	ENST00000269305	21	195	0.0791	1.8149	0.0439	0.7887	0.5073
TP53:282:01:ENST00000269305	5	BRCA	1	TP53	282	ENST00000269305	5	188	0.0805	5.8999	0.0186	0.9859	0.8699
EGFR:289:01:ENST00000275493	4	LGG	1	EGFR	289	ENST00000275493	4	9	0.0811	0.1735	0.1176	0.8976	0.6409
TP53:245:01:ENST00000269305	4	UCEC	1	TP53	245	ENST00000269305	4	82	0.0823	0	0.9979	0.967	0.792
DDX17:121:01:ENST00000403230	4	UCEC	1	DDX17	121	ENST00000403230	4	4	0.0857	NA	0.9996	0.5962	0.3178
DDX17:163:01:ENST00000403230	4	UCEC	1	DDX17	163	ENST00000403230	4	4	0.0857	0	0.9996	0.5962	0.3178
PCLO:4044:06:ENST00000333891	4	SKCM	6	PCLO	4044	ENST00000333891	4	12	0.0879	0.2095	0.1516	0.5411	0.2476
PTEN:170:01:ENST00000371953	4	UCEC	1	PTEN	170	ENST00000371953	4	161	0.0882	4.8438	0.0372	0.958	0.7622
PIK3CA:118:01:ENST00000263967	10	UCEC	1	PIK3CA	118	ENST00000263967	9	173	0.0887	3.2749	0.0583	0.9994	0.9714
TP53:248:01:ENST00000269305	5	LIHC	1	TP53	248	ENST00000269305	5	15	0.0918	0	0.9985	0.1726	0.0786
PIK3CA:726:01:ENST00000263967	6	CESC	1	PIK3CA	726	ENST00000263967	5	44	0.0927	3.229	0.0862	0.7505	0.4157
TP53:273:01:ENST00000269305	5	PAAD	1	TP53	273	ENST00000269305	5	32	0.0935	0.3431	0.1552	0.8952	0.6303
TP53:161:01:ENST00000269305	5	BLCA	1	TP53	161	ENST00000269305	4	87	0.096	4.201	0.0183	0.8089	0.5604
TP53:278:01:ENST00000269305	10	LUSC	1	TP53	278	ENST00000269305	10	218	0.0989	0.3656	0.1596	0.9926	0.902
PTEN:57:01:ENST00000371953	5	UCEC	1	PTEN	57	ENST00000371953	4	161	0.0992	4.418	0.0475	0.9521	0.7456
TP53:220:01:ENST00000269305	7	HNSC	1	TP53	220	ENST00000269305	5	180	0.0997	0.2641	0.1868	0.9931	0.9049
ARID1A:693:01:ENST00000324856	5	UCEC	1	ARID1A	693	ENST00000324856	4	73	0.1005	0	0.9988	0.9479	0.7374
SPOP:131:01:ENST00000347630	14	PRAD	1	SPOP	131	ENST00000347630	14	34	0.1105	0	0.9994	0.8704	0.5945
CDKN2A:108:01:ENST00000304494	6	LUSC	1	CDKN2A	108	ENST00000304494	6	11	0.1172	2.5202	0.1539	0.3016	0.0485
TTN:13056:06:ENST00000591111	4	SKCM	6	TTN	13056	ENST00000591111	4	24	0.1178	3.5049	0.0676	0.9994	0.9731
TP53:205:01:ENST00000269305	4	UCEC	1	TP53	205	ENST00000269305	4	82	0.1181	2.2484	0.2009	0.2788	0.0579
TP53:280:01:ENST00000269305	15	BLCA	1	TP53	280	ENST00000269305	13	78	0.1199	0.4772	0.1603	0.9994	0.9721
SCAF4:120:01:ENST00000286835	5	UCEC	1	SCAF4	120	ENST00000286835	4	12	0.1242	NA	0.9996	0.7153	0.4371
SCAF4:250:01:ENST00000286835	12	UCEC	1	SCAF4	250	ENST00000286835	12	4	0.1242	0	0.9996	0.7153	0.4371
PIK3R1:575:01:ENST00000521381	5	UCEC	1	PIK3R1	575	ENST00000521381	5	60	0.1265	4.1976	0.0831	0.9066	0.67
APC:1114:01:ENST00000257430	7	READ	1	APC	1114	ENST00000257430	5	20	0.1269	0	0.9994	0.798	0.4902
KRAS:12:01:ENST00000256078	18	STAD	1	KRAS	12	ENST00000256078	15	6	0.1332	0.2685	0.0893	0.4819	0.2679
KRAS:13:01:ENST00000256078	12	STAD	1	KRAS	13	ENST00000256078	6	15	0.1332	3.7245	0.0893	0.4819	0.2679
TP53:271:01:ENST00000269305	4	LUSC	1	TP53	271	ENST00000269305	4	224	0.1421	0.3398	0.2848	0.8866	0.6084
CNTN5:379:06:ENST00000524871	7	SKCM	6	CNTN5	379	ENST00000524871	5	4	0.1429	0.3068	0.1787	0.6893	0.2622
CSMD3:258:06:ENST00000297405	5	SKCM	6	CSMD3	258	ENST00000297405	4	4	0.1429	NA	0.9994	0.529	0.2715
CSMD3:334:06:ENST00000297405	4	SKCM	6	CSMD3	334	ENST00000297405	4	4	0.1429	0	0.9994	0.529	0.2715
PRKDC:2704:01:ENST00000314191	4	UCEC	1	PRKDC	2704	ENST00000314191	4	5	0.1429	NA	0.9996	0.54	0.259
PRKDC:3605:01:ENST00000314191	5	UCEC	1	PRKDC	3605	ENST00000314191	5	4	0.1429	0	0.9996	0.54	0.259
PPP2R1A:179:01:ENST00000322088	26	UCEC	1	PPP2R1A	179	ENST00000322088	26	22	0.1465	2.4019	0.159	0.8826	0.6176
THSD7B:305:06:ENST00000272643	5	SKCM	6	THSD7B	305	ENST00000272643	5	17	0.1482	2.2121	0.1671	0.4753	0.1035
PIK3R1:464:01:ENST00000521381	5	UCEC	1	PIK3R1	464	ENST00000521381	4	61	0.1489	3.7234	0.0977	0.3723	0.116
TP53:248:01:ENST00000269305	4	LUAD	1	TP53	248	ENST00000269305	4	82	0.1516	0	0.9978	0.9993	0.9702
TP53:245:01:ENST00000269305	10	HNSC	1	TP53	245	ENST00000269305	9	176	0.1519	0.4808	0.2125	0.9859	0.8573
PIK3CA:1047:01:ENST00000263967	21	COAD	1	PIK3CA	1047	ENST00000263967	16	47	0.158	0.2813	0.2303	0.5086	0.2356
TP53:172:01:ENST00000269305	4	LUSC	1	TP53	172	ENST00000269305	4	224	0.1592	0	0.9943	0.6449	0.3881
CDKN2A:88:01:ENST00000304494	5	HNSC	1	CDKN2A	88	ENST00000304494	4	49	0.1612	0.3137	0.2564	0.8525	0.5893
KRAS:13:01:ENST00000256078	15	UCEC	1	KRAS	13	ENST00000256078	14	68	0.1613	0	0.9986	0.4963	0.255
TP53:237:01:ENST00000269305	5	OV	1	TP53	237	ENST00000269305	5	211	0.1659	2.2455	0.115	0.8923	0.6084
TP53:32:01:ENST00000269305	4	HNSC	1	TP53	32	ENST00000269305	4	181	0.1704	2.8819	0.0725	0.8223	0.5759
PTEN:136:01:ENST00000371953	7	UCEC	1	PTEN	136	ENST00000371953	7	158	0.1718	3.1434	0.1276	0.9977	0.947
PIK3CA:93:01:ENST00000263967	11	UCEC	1	PIK3CA	93	ENST00000263967	8	174	0.173	0	0.9971	0.8876	0.6158
KIT:418:03:ENST00000288135	4	LAML	3	KIT	418	ENST00000288135	4	5	0.1746	0	0.9993	0.4514	0.2262
KIT:816:03:ENST00000288135	5	LAML	3	KIT	816	ENST00000288135	5	4	0.1746	NA	0.9993	0.4514	0.2262
ALG13:290:01:ENST00000394780	5	UCEC	1	ALG13	290	ENST00000394780	5	4	0.1746	0	0.9997	0.6893	0.3927
TP53:245:01:ENST00000269305	6	LGG	1	TP53	245	ENST00000269305	6	136	0.1747	0.3754	0.3358	0.7318	0.4082
TP53:125:01:ENST00000269305	7	LUSC	1	TP53	125	ENST00000269305	7	221	0.1783	0.3004	0.232	0.7891	0.511
TP53:248:01:ENST00000269305	11	LUSC	1	TP53	248	ENST00000269305	10	218	0.1818	2.1763	0.0932	0.6917	0.4193
TP53:220:01:ENST00000269305	10	BRCA	1	TP53	220	ENST00000269305	10	183	0.1864	0.5023	0.3678	0.2153	0.0585
PIK3CA:1043:01:ENST00000263967	4	LGG	1	PIK3CA	1043	ENST00000263967	4	9	0.1874	0	0.9993	0.9201	0.686
TP53:213:01:ENST00000269305	4	ESCA	1	TP53	213	ENST00000269305	4	60	0.1884	2.399	0.1616	0.7906	0.4526
OR51S1:194:06:ENST00000322101	7	SKCM	6	OR51S1	194	ENST00000322101	4	5	0.1905	4.0266	0.2293	0.8924	0.6235
OR51S1:241:06:ENST00000322101	5	SKCM	6	OR51S1	241	ENST00000322101	5	4	0.1905	0.2484	0.2293	0.8924	0.6235
TP53:158:01:ENST00000269305	17	LUSC	1	TP53	158	ENST00000269305	16	212	0.1915	0.6261	0.2682	0.2746	0.0856
EGFR:222:01:ENST00000275493	6	GBM	1	EGFR	222	ENST00000275493	5	40	0.1929	2.0688	0.1411	0.8663	0.4591
FBXW7:423:01:ENST00000281708	8	UCEC	1	FBXW7	423	ENST00000281708	8	43	0.1985	2.9302	0.1995	0.628	0.3619
SPOP:102:01:ENST00000347630	8	PRAD	1	SPOP	102	ENST00000347630	8	40	0.2002	NA	0.9996	0.9923	0.9005
RHOB:172:01:ENST00000272233	6	BLCA	1	RHOB	172	ENST00000272233	5	6	0.2035	0.2592	0.2284	0.774	0.4725
RHOB:75:01:ENST00000272233	6	BLCA	1	RHOB	75	ENST00000272233	6	5	0.2035	3.8587	0.2284	0.774	0.4725
INPPL1:1156:01:ENST00000298229	15	UCEC	1	INPPL1	1156	ENST00000298229	15	11	0.2046	0.3308	0.2276	0.5036	0.2547
TP53:331:01:ENST00000269305	6	BRCA	1	TP53	331	ENST00000269305	5	188	0.2048	0.4457	0.4502	0.6479	0.3196
VHL:158:01:ENST00000256474	7	KIRC	1	VHL	158	ENST00000256474	7	40	0.207	1.8431	0.2537	0.4096	0.1403
TP53:187:01:ENST00000269305	11	OV	1	TP53	187	ENST00000269305	10	206	0.207	1.9473	0.1142	0.8499	0.587
TP53:194:01:ENST00000269305	5	BRCA	1	TP53	194	ENST00000269305	4	189	0.21	10.1362	0.0347	0.2183	0.1466
FGFR2:252:01:ENST00000358487	22	UCEC	1	FGFR2	252	ENST00000358487	22	12	0.2132	NA	0.9988	0.6885	0.3947
TP53:248:01:ENST00000269305	10	PAAD	1	TP53	248	ENST00000269305	10	27	0.2145	1.8882	0.1759	0.9801	0.8428
PIK3CA:542:01:ENST00000263967	41	BRCA	1	PIK3CA	542	ENST00000263967	38	233	0.2146	0.5612	0.2806	0.3562	0.1395
CTNNB1:41:01:ENST00000349496	12	UCEC	1	CTNNB1	41	ENST00000349496	11	77	0.2154	0	0.998	0.9974	0.9417
PIK3CA:111:01:ENST00000263967	5	BRCA	1	PIK3CA	111	ENST00000263967	5	266	0.2189	1.9206	0.3735	0.3668	0.1136
PIK3R1:642:01:ENST00000521381	7	UCEC	1	PIK3R1	642	ENST00000521381	5	60	0.2221	0	0.9983	0.9674	0.8002
TP53:175:01:ENST00000269305	13	STAD	1	TP53	175	ENST00000269305	11	55	0.2245	0.2673	0.1989	0.0078	0.006
TP53:176:01:ENST00000269305	6	HNSC	1	TP53	176	ENST00000269305	6	179	0.2249	0.4692	0.2919	0.3481	0.109
TP53:273:01:ENST00000269305	10	READ	1	TP53	273	ENST00000269305	9	28	0.2271	0.3261	0.2911	0.9944	0.9156
ACVR1:206:01:ENST00000263640	4	UCEC	1	ACVR1	206	ENST00000263640	4	4	0.2286	0	0.9996	0.392	0.1694
ACVR1:375:01:ENST00000263640	4	UCEC	1	ACVR1	375	ENST00000263640	4	4	0.2286	NA	0.9996	0.392	0.1694
CCND1:286:01:ENST00000227507	7	UCEC	1	CCND1	286	ENST00000227507	7	10	0.2319	0	0.9994	0.701	0.3998
TP53:173:01:ENST00000269305	4	BRCA	1	TP53	173	ENST00000269305	4	189	0.2321	6.9973	0.0627	0.3323	0.2007
TP53:157:01:ENST00000269305	4	HNSC	1	TP53	157	ENST00000269305	4	181	0.2332	0.3591	0.3087	0.9726	0.8089
HRAS:12:01:ENST00000311189	11	HNSC	1	HRAS	12	ENST00000311189	11	13	0.2338	0.3943	0.2549	0.8976	0.6439
TP53:261:01:ENST00000269305	5	STAD	1	TP53	261	ENST00000269305	5	61	0.2346	1.6595	0.3316	0.0503	0.0009
ARID1A:551:01:ENST00000324856	7	UCEC	1	ARID1A	551	ENST00000324856	5	72	0.2347	3.9425	0.2137	0.617	0.3646
PIK3CA:545:01:ENST00000263967	35	BLCA	1	PIK3CA	545	ENST00000263967	28	22	0.2353	1.5962	0.2477	0.9686	0.8005
PIK3CA:1021:01:ENST00000263967	7	UCEC	1	PIK3CA	1021	ENST00000263967	4	178	0.2366	0	0.9978	0.9864	0.8694
TP53:213:01:ENST00000269305	6	BRCA	1	TP53	213	ENST00000269305	6	187	0.2368	0	0.9972	0.9902	0.8905
CTCF:204:01:ENST00000264010	29	UCEC	1	CTCF	204	ENST00000264010	27	20	0.2369	0.4069	0.2414	0.3603	0.1629
ARID1A:1519:01:ENST00000324856	4	UCEC	1	ARID1A	1519	ENST00000324856	4	73	0.2375	0	0.9988	0.6961	0.3679
TP53:278:01:ENST00000269305	4	ESCA	1	TP53	278	ENST00000269305	4	60	0.2377	0.3745	0.3374	0.9966	0.9326
EGFR:252:01:ENST00000275493	5	LGG	1	EGFR	252	ENST00000275493	5	8	0.2378	2.4726	0.2399	0.7527	0.4301
CIC:202:01:ENST00000575354	5	LGG	1	CIC	202	ENST00000575354	4	26	0.2391	NA	0.9996	0.3668	0.1266
PTEN:130:01:ENST00000371953	7	GBM	1	PTEN	130	ENST00000371953	6	13	0.2402	3.5265	0.1139	0.4515	0.2264
ARID1A:1335:01:ENST00000324856	5	UCEC	1	ARID1A	1335	ENST00000324856	4	73	0.2411	0	0.9988	0.1681	0.0342
TP53:234:01:ENST00000269305	5	OV	1	TP53	234	ENST00000269305	5	211	0.242	0.3286	0.2704	0.8552	0.5932
TP53:175:01:ENST00000269305	9	UCEC	1	TP53	175	ENST00000269305	8	78	0.2435	2.2331	0.2054	0.9911	0.8946
TP53:307:01:ENST00000269305	5	LUSC	1	TP53	307	ENST00000269305	5	223	0.2437	0.6276	0.4311	0.1773	0.0305
TP53:282:01:ENST00000269305	6	GBM	1	TP53	282	ENST00000269305	6	42	0.2439	1.8751	0.2063	0.8933	0.6136
TP53:176:01:ENST00000269305	5	COAD	1	TP53	176	ENST00000269305	5	96	0.2462	2.7384	0.179	0.9228	0.6975
TP53:306:01:ENST00000269305	4	OV	1	TP53	306	ENST00000269305	4	212	0.2482	1.7263	0.2841	0.4039	0.0584
CTNNB1:35:01:ENST00000349496	4	LIHC	1	CTNNB1	35	ENST00000349496	4	71	0.2505	0	0.9981	0.8814	0.6022
PIK3R1:576:01:ENST00000521381	7	UCEC	1	PIK3R1	576	ENST00000521381	7	58	0.2517	0	0.9981	0.9638	0.7886
TP53:179:01:ENST00000269305	9	HNSC	1	TP53	179	ENST00000269305	8	177	0.2529	0.4542	0.2697	0.489	0.2705
PIK3CA:1047:01:ENST00000263967	4	ESCA	1	PIK3CA	1047	ENST00000263967	4	5	0.254	0	0.9994	0.392	0.1694
PIK3CA:545:01:ENST00000263967	6	ESCA	1	PIK3CA	545	ENST00000263967	5	4	0.254	NA	0.9994	0.392	0.1694
PIK3CA:1047:01:ENST00000263967	5	UCS	1	PIK3CA	1047	ENST00000263967	5	4	0.254	2.464	0.3027	0.3679	0.1383
TP53:278:01:ENST00000269305	5	HNSC	1	TP53	278	ENST00000269305	4	181	0.2554	0.3627	0.3161	0.8512	0.5529
CDK4:22:06:ENST00000257904	4	SKCM	6	CDK4	22	ENST00000257904	4	4	0.2571	0.2628	0.2532	0.321	0.0673
CDK4:24:06:ENST00000257904	4	SKCM	6	CDK4	24	ENST00000257904	4	4	0.2571	3.8053	0.2532	0.321	0.0673
TP53:175:01:ENST00000269305	16	OV	1	TP53	175	ENST00000269305	15	201	0.2595	0.6387	0.2856	0.8433	0.5718
PTEN:157:01:ENST00000371953	4	UCEC	1	PTEN	157	ENST00000371953	4	161	0.262	3.227	0.2552	0.8439	0.541
NFE2L2:31:01:ENST00000397062	7	LUSC	1	NFE2L2	31	ENST00000397062	6	43	0.264	0.486	0.3475	0.9897	0.8845
TP53:179:01:ENST00000269305	10	LUSC	1	TP53	179	ENST00000269305	9	219	0.2672	0.5753	0.3471	0.8158	0.5079
TP53:157:01:ENST00000269305	5	LUAD	1	TP53	157	ENST00000269305	5	81	0.2683	0.5573	0.4304	0.0578	0.0054
TP53:152:01:ENST00000269305	5	STAD	1	TP53	152	ENST00000269305	5	61	0.27	0.3768	0.3398	0.9366	0.7242
TP53:280:01:ENST00000269305	4	LGG	1	TP53	280	ENST00000269305	4	138	0.2715	1.5608	0.4687	0.1797	0.0249
TP53:163:01:ENST00000269305	7	HNSC	1	TP53	163	ENST00000269305	7	178	0.2716	0.5773	0.3496	0.9658	0.7894
APC:213:01:ENST00000257430	13	COAD	1	APC	213	ENST00000257430	12	121	0.2722	0.3387	0.2869	0.7344	0.4505
APC:1114:01:ENST00000257430	10	COAD	1	APC	1114	ENST00000257430	7	126	0.2735	0	0.9968	0.4187	0.2207
TP53:275:01:ENST00000269305	4	OV	1	TP53	275	ENST00000269305	4	212	0.2766	0.5445	0.3949	0.7956	0.4691
GATA3:335:01:ENST00000346208	12	BRCA	1	GATA3	335	ENST00000346208	12	48	0.2768	4.0331	0.112	0.033	0.0194
TP53:220:01:ENST00000269305	7	UCEC	1	TP53	220	ENST00000269305	7	79	0.2813	0.3922	0.368	0.8927	0.6254
TP53:187:01:ENST00000269305	4	SARC	1	TP53	187	ENST00000269305	4	12	0.2824	0.3601	0.3559	0.9921	0.8996
TP53:282:01:ENST00000269305	5	ESCA	1	TP53	282	ENST00000269305	4	60	0.2825	3.2305	0.1229	0.325	0.2134
TP53:192:01:ENST00000269305	4	BLCA	1	TP53	192	ENST00000269305	4	87	0.283	0.3882	0.35	0.9992	0.9683
TP53:271:01:ENST00000269305	6	BLCA	1	TP53	271	ENST00000269305	4	87	0.2858	2.0577	0.2294	0.3521	0.0958
TP53:193:01:ENST00000269305	5	OV	1	TP53	193	ENST00000269305	5	211	0.2888	0.6213	0.4169	0.815	0.4946
CDH1:63:01:ENST00000261769	4	BRCA	1	CDH1	63	ENST00000261769	4	15	0.289	NA	0.9996	0.9105	0.6575
TP53:298:01:ENST00000269305	6	HNSC	1	TP53	298	ENST00000269305	5	180	0.2903	1.7863	0.257	0.8599	0.552
PTEN:27:01:ENST00000371953	5	UCEC	1	PTEN	27	ENST00000371953	4	161	0.291	3.0325	0.2806	0.7281	0.4623
TP53:285:01:ENST00000269305	4	BRCA	1	TP53	285	ENST00000269305	4	189	0.2912	1.6877	0.4789	0.2042	0.0383
CDKN2A:110:01:ENST00000304494	5	LUSC	1	CDKN2A	110	ENST00000304494	5	12	0.2925	0.4523	0.3141	0.9214	0.6875
TP53:282:01:ENST00000269305	5	OV	1	TP53	282	ENST00000269305	5	211	0.2937	2.3907	0.1408	0.8672	0.6166
TP53:282:01:ENST00000269305	11	COAD	1	TP53	282	ENST00000269305	11	90	0.2952	2.22	0.2095	0.0299	0.0224
PIK3CA:545:01:ENST00000263967	11	STAD	1	PIK3CA	545	ENST00000263967	9	18	0.298	0.4508	0.3163	0.7737	0.4792
ARID1A:1721:01:ENST00000324856	5	UCEC	1	ARID1A	1721	ENST00000324856	4	73	0.2993	0	0.9989	0.5987	0.28
PIK3CA:542:01:ENST00000263967	4	LUAD	1	PIK3CA	542	ENST00000263967	4	5	0.3016	4.4693	0.2333	0.5108	0.2605
PIK3CA:545:01:ENST00000263967	6	LUAD	1	PIK3CA	545	ENST00000263967	5	4	0.3016	0.2237	0.2333	0.5108	0.2605
NFE2L2:34:01:ENST00000397062	16	LUSC	1	NFE2L2	34	ENST00000397062	16	33	0.302	0.6092	0.3269	0.4839	0.2185
FBXW7:505:01:ENST00000281708	14	UCEC	1	FBXW7	505	ENST00000281708	12	39	0.3072	0.4029	0.4022	0.4189	0.1762
TP53:283:01:ENST00000269305	4	HNSC	1	TP53	283	ENST00000269305	4	181	0.3124	0.3965	0.3576	0.9869	0.8737
CLMN:842:01:ENST00000298912	4	UCEC	1	CLMN	842	ENST00000298912	4	4	0.3143	0	0.9996	0.6769	0.3817
CLMN:865:01:ENST00000298912	4	UCEC	1	CLMN	865	ENST00000298912	4	4	0.3143	NA	0.9996	0.6769	0.3817
PTEN:233:01:ENST00000371953	5	GBM	1	PTEN	233	ENST00000371953	5	14	0.3146	0.5368	0.3424	0.9276	0.7092
EGFR:289:01:ENST00000275493	21	GBM	1	EGFR	289	ENST00000275493	21	24	0.3184	0.7122	0.3263	0.7126	0.4052
TP53:163:01:ENST00000269305	9	OV	1	TP53	163	ENST00000269305	9	207	0.3227	1.7931	0.2031	0.5466	0.3176
TP53:273:01:ENST00000269305	20	OV	1	TP53	273	ENST00000269305	19	197	0.3237	0.7614	0.3912	0.2115	0.057
APC:1414:01:ENST00000257430	7	COAD	1	APC	1414	ENST00000257430	6	127	0.3246	0.4404	0.4205	0.6975	0.3786
TP53:248:01:ENST00000269305	8	BRCA	1	TP53	248	ENST00000269305	8	185	0.3251	2.3102	0.2583	0.9709	0.809
TP53:273:01:ENST00000269305	59	LGG	1	TP53	273	ENST00000269305	59	83	0.3273	1.4189	0.3168	0.2939	0.1226
TP53:278:01:ENST00000269305	5	BRCA	1	TP53	278	ENST00000269305	4	189	0.3311	0	0.9978	0.9874	0.8761
TP53:179:01:ENST00000269305	9	LGG	1	TP53	179	ENST00000269305	9	133	0.3316	3.3705	0.1114	0.2311	0.1245
APC:302:01:ENST00000257430	5	COAD	1	APC	302	ENST00000257430	5	128	0.3339	2.2798	0.2626	0.9692	0.8042
APC:1408:01:ENST00000257430	6	COAD	1	APC	1408	ENST00000257430	4	129	0.3355	2.0797	0.3211	0.4773	0.1777
PIK3CA:542:01:ENST00000263967	23	UCEC	1	PIK3CA	542	ENST00000263967	23	159	0.336	0.368	0.3298	0.3407	0.1596
TP53:175:01:ENST00000269305	8	LGG	1	TP53	175	ENST00000269305	7	135	0.3364	0	0.9971	0.74	0.4604
APC:1450:01:ENST00000257430	7	READ	1	APC	1450	ENST00000257430	5	20	0.3377	4.2279	0.3122	0.6137	0.3472
EGFR:774:01:ENST00000275493	4	GBM	1	EGFR	774	ENST00000275493	4	41	0.3381	2.4278	0.1543	0.0722	0.1187
PPP2R1A:183:01:ENST00000322088	9	UCEC	1	PPP2R1A	183	ENST00000322088	8	40	0.3396	0.3937	0.3748	0.9573	0.765
KMT2D:647:01:ENST00000301067	6	UCEC	1	KMT2D	647	ENST00000301067	5	17	0.3404	2.843	0.2974	0.9453	0.7283
PIK3CA:726:01:ENST00000263967	10	BRCA	1	PIK3CA	726	ENST00000263967	9	262	0.3413	0	0.9972	0.6738	0.3982
PIK3CA:345:01:ENST00000263967	16	BRCA	1	PIK3CA	345	ENST00000263967	16	255	0.3449	1.553	0.41	0.363	0.1326
CTCF:448:01:ENST00000264010	7	UCEC	1	CTCF	448	ENST00000264010	6	41	0.3452	2.3135	0.3181	0.9941	0.9127
TP53:236:01:ENST00000269305	5	HNSC	1	TP53	236	ENST00000269305	4	181	0.3467	0.4113	0.3777	0.9997	0.9829
CDKN2A:80:06:ENST00000304494	4	SKCM	6	CDKN2A	80	ENST00000304494	4	18	0.3505	3.0342	0.2247	0.8892	0.6425
TP53:126:01:ENST00000269305	7	BRCA	1	TP53	126	ENST00000269305	7	186	0.3586	1.9915	0.3555	0.9999	0.996
CELSR1:1849:01:ENST00000262738	4	UCEC	1	CELSR1	1849	ENST00000262738	4	8	0.3596	4.2426	0.3141	0.9236	0.6957
CELSR1:614:01:ENST00000262738	9	UCEC	1	CELSR1	614	ENST00000262738	8	4	0.3596	0.2357	0.3141	0.9236	0.6957
FBXW7:465:01:ENST00000281708	16	UCEC	1	FBXW7	465	ENST00000281708	13	38	0.3612	0.421	0.4243	0.6776	0.3683
TP53:151:01:ENST00000269305	5	HNSC	1	TP53	151	ENST00000269305	5	180	0.3634	1.6134	0.3503	0.8533	0.541
HRAS:13:01:ENST00000311189	11	HNSC	1	HRAS	13	ENST00000311189	10	14	0.3673	2.0612	0.3456	0.3571	0.1671
TP53:273:01:ENST00000269305	22	UCEC	1	TP53	273	ENST00000269305	21	65	0.3703	1.5849	0.3538	0.9965	0.9336
PIK3CA:1047:01:ENST00000263967	8	BLCA	1	PIK3CA	1047	ENST00000263967	7	43	0.3728	0.6092	0.4223	0.9992	0.9679
TP53:187:01:ENST00000269305	4	ESCA	1	TP53	187	ENST00000269305	4	60	0.373	0.4433	0.4281	0.9489	0.754
CIC:215:01:ENST00000575354	12	LGG	1	CIC	215	ENST00000575354	12	18	0.3732	0	0.9995	0.908	0.6594
TP53:237:01:ENST00000269305	4	LGG	1	TP53	237	ENST00000269305	4	138	0.3743	0.6862	0.6162	0.0961	0.0084
PTEN:16:01:ENST00000371953	4	UCEC	1	PTEN	16	ENST00000371953	4	161	0.3754	0	0.998	0.9295	0.6936
CTNNB1:335:01:ENST00000349496	5	LIHC	1	CTNNB1	335	ENST00000349496	4	71	0.3801	2.065	0.3343	0.9814	0.8434
TP53:282:01:ENST00000269305	6	STAD	1	TP53	282	ENST00000269305	5	61	0.3816	1.7408	0.3699	0.949	0.7382
CTCF:318:01:ENST00000264010	4	UCEC	1	CTCF	318	ENST00000264010	4	43	0.3922	2.4831	0.4009	0.4584	0.2667
TP53:175:01:ENST00000269305	13	READ	1	TP53	175	ENST00000269305	12	25	0.3943	2.1119	0.3285	0.6286	0.349
TP53:158:01:ENST00000269305	4	LGG	1	TP53	158	ENST00000269305	4	138	0.3948	4.4785	0.1587	0.5648	0.3353
CDKN2A:51:06:ENST00000304494	4	SKCM	6	CDKN2A	51	ENST00000304494	4	18	0.3959	0.5559	0.4861	0.5173	0.2247
FBXW7:582:01:ENST00000281708	4	COAD	1	FBXW7	582	ENST00000281708	4	25	0.3967	3.7566	0.2834	0.915	0.6836
FGFR3:370:01:ENST00000260795	4	BLCA	1	FGFR3	370	ENST00000260795	4	37	0.3995	4.5994	0.1766	0.0215	0.0336
FGFR2:382:01:ENST00000358487	6	UCEC	1	FGFR2	382	ENST00000358487	6	28	0.4011	0	0.9991	0.9994	0.9722
TP53:193:01:ENST00000269305	5	LUAD	1	TP53	193	ENST00000269305	5	81	0.402	0	0.9972	0.2142	0.1236
TP53:213:01:ENST00000269305	11	COAD	1	TP53	213	ENST00000269305	10	91	0.4028	0.4272	0.4068	0.9149	0.6832
TP53:245:01:ENST00000269305	14	LUSC	1	TP53	245	ENST00000269305	14	214	0.4061	0.7059	0.4495	0.9521	0.7488
PPP2R1A:256:01:ENST00000322088	10	UCEC	1	PPP2R1A	256	ENST00000322088	10	38	0.4096	0.5517	0.445	0.9355	0.7112
COL21A1:701:06:ENST00000244728	5	SKCM	6	COL21A1	701	ENST00000244728	4	9	0.4112	0	0.9991	0.4804	0.2455
KRAS:13:01:ENST00000256078	8	READ	1	KRAS	13	ENST00000256078	7	37	0.4127	1.8191	0.4872	0.9724	0.8144
TP53:331:01:ENST00000269305	5	LUAD	1	TP53	331	ENST00000269305	5	81	0.4135	0.4757	0.4665	0.9358	0.7084
TP53:154:01:ENST00000269305	7	LUSC	1	TP53	154	ENST00000269305	7	221	0.4135	0.5856	0.455	0.999	0.9632
PTPRT:1266:06:ENST00000373187	4	SKCM	6	PTPRT	1266	ENST00000373187	4	9	0.414	2.4963	0.3207	0.7577	0.4773
CTCF:377:01:ENST00000264010	10	UCEC	1	CTCF	377	ENST00000264010	9	38	0.4156	1.9674	0.4224	0.9906	0.8915
PIK3CA:545:01:ENST00000263967	35	COAD	1	PIK3CA	545	ENST00000263967	31	32	0.4188	1.6671	0.4292	0.9498	0.7486
KRAS:13:01:ENST00000256078	32	COAD	1	KRAS	13	ENST00000256078	29	112	0.4194	1.399	0.4118	0.9988	0.9619
PIK3R1:577:01:ENST00000521381	5	UCEC	1	PIK3R1	577	ENST00000521381	5	60	0.424	0	0.9984	0.9935	0.9099
CIC:1515:01:ENST00000575354	4	LGG	1	CIC	1515	ENST00000575354	4	26	0.4307	NA	NA	0.9703	0.809
CIC:201:01:ENST00000575354	4	LGG	1	CIC	201	ENST00000575354	4	26	0.4307	1.7321	0.7082	0.9952	0.9216
CDKN2A:51:01:ENST00000304494	4	HNSC	1	CDKN2A	51	ENST00000304494	4	49	0.4314	2.5171	0.2225	0.0056	0.027
RP1:1055:06:ENST00000220676	5	SKCM	6	RP1	1055	ENST00000220676	4	11	0.4322	1.9379	0.4534	0.986	0.8679
TP53:273:01:ENST00000269305	20	COAD	1	TP53	273	ENST00000269305	19	82	0.4326	1.524	0.412	0.8828	0.6255
ARID1A:766:01:ENST00000324856	5	UCEC	1	ARID1A	766	ENST00000324856	5	72	0.433	2.7282	0.3601	0.757	0.4326
TP53:196:01:ENST00000269305	9	HNSC	1	TP53	196	ENST00000269305	8	177	0.4353	0.6464	0.4574	0.9159	0.6848
APC:943:01:ENST00000257430	4	COAD	1	APC	943	ENST00000257430	4	129	0.4354	1.5558	0.5471	0.6172	0.2789
TP53:307:01:ENST00000269305	4	OV	1	TP53	307	ENST00000269305	4	212	0.4394	1.434	0.4797	0.3788	0.0503
TP53:248:01:ENST00000269305	7	UCS	1	TP53	248	ENST00000269305	6	4	0.4476	NA	0.9992	0.0146	0.0024
TP53:273:01:ENST00000269305	4	UCS	1	TP53	273	ENST00000269305	4	6	0.4476	0	0.9992	0.0146	0.0024
PIK3CA:88:01:ENST00000263967	10	COAD	1	PIK3CA	88	ENST00000263967	5	58	0.4491	1.7469	0.6003	0.5751	0.3315
TP53:278:01:ENST00000269305	6	OV	1	TP53	278	ENST00000269305	6	210	0.4541	0.6892	0.5252	0.9627	0.7768
PIK3R1:564:01:ENST00000521381	6	UCEC	1	PIK3R1	564	ENST00000521381	6	59	0.4544	1.6163	0.5471	0.0845	0.012
PIK3CA:545:01:ENST00000263967	17	LUSC	1	PIK3CA	545	ENST00000263967	15	18	0.4545	0.6772	0.4619	0.2899	0.1163
CDKN2A:110:01:ENST00000304494	9	HNSC	1	CDKN2A	110	ENST00000304494	8	45	0.4547	1.4896	0.4262	0.9795	0.8368
TP53:192:01:ENST00000269305	6	OV	1	TP53	192	ENST00000269305	5	211	0.4552	0.4531	0.4308	0.2129	0.1285
VHL:65:01:ENST00000256474	4	KIRC	1	VHL	65	ENST00000256474	4	43	0.4559	1.5329	0.5107	0.5124	0.1884
TP53:281:01:ENST00000269305	4	OV	1	TP53	281	ENST00000269305	4	212	0.4576	0.4817	0.4673	0.407	0.2412
TTK:192:01:ENST00000369798	5	UCEC	1	TTK	192	ENST00000369798	5	11	0.4615	0	0.9995	0.9821	0.8497
TP53:280:01:ENST00000269305	5	BRCA	1	TP53	280	ENST00000269305	5	188	0.4617	2.5967	0.3529	0.6964	0.4279
PIK3CA:546:01:ENST00000263967	11	BRCA	1	PIK3CA	546	ENST00000263967	11	260	0.4632	0.4977	0.4989	0.7624	0.4458
EGFR:252:01:ENST00000275493	4	GBM	1	EGFR	252	ENST00000275493	4	41	0.4644	0.6645	0.5028	0.9607	0.7703
ATRX:1302:01:ENST00000373344	4	LGG	1	ATRX	1302	ENST00000373344	4	6	0.4667	NA	0.9996	0.9925	0.9026
ATRX:1426:01:ENST00000373344	6	LGG	1	ATRX	1426	ENST00000373344	6	4	0.4667	0	0.9996	0.9925	0.9026
TP53:273:01:ENST00000269305	17	LUSC	1	TP53	273	ENST00000269305	14	214	0.4696	1.422	0.4079	0.6629	0.3889
TP53:193:01:ENST00000269305	4	UCEC	1	TP53	193	ENST00000269305	4	82	0.474	0.5608	0.5751	0.7069	0.3748
CCND1:291:01:ENST00000227507	5	UCEC	1	CCND1	291	ENST00000227507	5	12	0.4751	3	0.4373	0.9573	0.7708
NFE2L2:34:01:ENST00000397062	6	UCEC	1	NFE2L2	34	ENST00000397062	6	4	0.4762	0.3904	0.4482	0.4862	0.2027
PIK3CA:545:01:ENST00000263967	27	UCEC	1	PIK3CA	545	ENST00000263967	26	156	0.4768	0.5893	0.4771	0.8587	0.5855
TP53:244:01:ENST00000269305	7	LUSC	1	TP53	244	ENST00000269305	6	222	0.4813	1.6109	0.4211	0.9251	0.7056
PIK3CA:453:01:ENST00000263967	7	BRCA	1	PIK3CA	453	ENST00000263967	5	266	0.4815	2.2385	0.4299	0.8647	0.6054
TP53:342:01:ENST00000269305	10	BRCA	1	TP53	342	ENST00000269305	9	184	0.4823	0	0.9975	0.277	0.144
TP53:248:01:ENST00000269305	15	ESCA	1	TP53	248	ENST00000269305	14	50	0.4883	1.3306	0.4997	0.7381	0.4207
TP53:245:01:ENST00000269305	8	LUAD	1	TP53	245	ENST00000269305	6	80	0.4885	0.4965	0.4924	0.9324	0.7157
TP53:294:01:ENST00000269305	4	HNSC	1	TP53	294	ENST00000269305	4	181	0.4892	0.491	0.4797	0.2691	0.1704
PIK3CA:542:01:ENST00000263967	13	COAD	1	PIK3CA	542	ENST00000263967	10	53	0.4929	0.5254	0.5416	0.9356	0.7212
TP53:220:01:ENST00000269305	10	LGG	1	TP53	220	ENST00000269305	9	133	0.4954	0.5	0.4957	0.912	0.6753
ARID1A:2236:01:ENST00000324856	4	UCEC	1	ARID1A	2236	ENST00000324856	4	73	0.503	0	0.9989	0.9877	0.8733
TP53:132:01:ENST00000269305	6	OV	1	TP53	132	ENST00000269305	6	210	0.5034	1.4706	0.4496	0.9861	0.8639
APC:232:01:ENST00000257430	7	COAD	1	APC	232	ENST00000257430	5	128	0.5045	0	0.9976	0.1384	0.0905
TP53:331:01:ENST00000269305	7	OV	1	TP53	331	ENST00000269305	7	209	0.5059	1.8231	0.3086	0.1834	0.1176
PTEN:343:01:ENST00000371953	5	UCEC	1	PTEN	343	ENST00000371953	5	160	0.506	0	0.9979	0.8509	0.5551
TP53:225:01:ENST00000269305	4	LUSC	1	TP53	225	ENST00000269305	4	224	0.5071	0.5403	0.5407	0.966	0.7988
CTNNB1:32:01:ENST00000349496	16	UCEC	1	CTNNB1	32	ENST00000349496	14	74	0.5075	0.5241	0.5404	0.8613	0.5923
APC:935:01:ENST00000257430	9	COAD	1	APC	935	ENST00000257430	9	124	0.5085	1.498	0.5109	0.9658	0.7838
ARID1A:1276:01:ENST00000324856	6	UCEC	1	ARID1A	1276	ENST00000324856	6	71	0.5134	2.2415	0.4616	0.9597	0.7756
PIK3CA:542:01:ENST00000263967	23	CESC	1	PIK3CA	542	ENST00000263967	16	33	0.5146	0.6859	0.536	0.9611	0.7735
KMT2D:1235:01:ENST00000301067	10	UCEC	1	KMT2D	1235	ENST00000301067	10	12	0.5167	0.4284	0.4632	0.925	0.6942
PIK3CA:1044:01:ENST00000263967	8	UCEC	1	PIK3CA	1044	ENST00000263967	6	176	0.5179	1.7821	0.5736	0.8937	0.6478
RPL22:89:01:ENST00000234875	5	UCEC	1	RPL22	89	ENST00000234875	4	42	0.5213	0	0.9988	0.8181	0.5453
TP53:187:01:ENST00000269305	6	LUSC	1	TP53	187	ENST00000269305	6	222	0.5229	1.5244	0.4748	0.9686	0.807
TP53:175:01:ENST00000269305	8	LUSC	1	TP53	175	ENST00000269305	8	220	0.5235	1.4263	0.4924	0.9937	0.9088
TP53:193:01:ENST00000269305	8	LUSC	1	TP53	193	ENST00000269305	7	221	0.5238	0.4791	0.4652	0.1313	0.0813
FGFR3:373:01:ENST00000260795	8	BLCA	1	FGFR3	373	ENST00000260795	8	33	0.5263	0.496	0.5095	0.9997	0.9785
PTEN:70:01:ENST00000371953	6	UCEC	1	PTEN	70	ENST00000371953	6	159	0.5263	1.7241	0.5975	0.7648	0.4884
APC:876:01:ENST00000257430	14	COAD	1	APC	876	ENST00000257430	12	121	0.5267	1.3809	0.5474	0.4713	0.1926
TP53:213:01:ENST00000269305	5	LGG	1	TP53	213	ENST00000269305	5	137	0.5307	2.7571	0.3259	0.2746	0.1614
ERBB2:755:01:ENST00000269571	7	BRCA	1	ERBB2	755	ENST00000269571	6	4	0.5333	NA	0.9996	0.5521	0.2663
ERBB2:777:01:ENST00000269571	4	BRCA	1	ERBB2	777	ENST00000269571	4	6	0.5333	0	0.9996	0.5521	0.2663
PTEN:130:01:ENST00000371953	78	UCEC	1	PTEN	130	ENST00000371953	63	102	0.5334	0.7325	0.5284	0.9266	0.6979
DNAH5:920:06:ENST00000265104	7	SKCM	6	DNAH5	920	ENST00000265104	5	21	0.5337	0.6669	0.5629	0.0421	0.0016
TP53:213:01:ENST00000269305	6	STAD	1	TP53	213	ENST00000269305	6	60	0.5352	1.4844	0.5232	0.9873	0.8712
TP53:266:01:ENST00000269305	4	COAD	1	TP53	266	ENST00000269305	4	97	0.5363	0	0.9977	0.5538	0.3182
TP53:336:01:ENST00000269305	5	BLCA	1	TP53	336	ENST00000269305	5	86	0.5424	0.666	0.5752	0.8322	0.5659
PIK3CA:542:01:ENST00000263967	18	BLCA	1	PIK3CA	542	ENST00000263967	15	35	0.5439	0.7689	0.5545	0.9553	0.7642
KRAS:12:01:ENST00000256078	102	COAD	1	KRAS	12	ENST00000256078	94	47	0.545	0.8013	0.5452	0.994	0.9106
TP53:249:01:ENST00000269305	11	LUAD	1	TP53	249	ENST00000269305	8	78	0.5455	1.4943	0.5168	0.8718	0.6136
ARID1A:2141:01:ENST00000324856	6	UCEC	1	ARID1A	2141	ENST00000324856	6	71	0.5488	2.1516	0.4847	0.7145	0.3901
TP53:176:01:ENST00000269305	6	STAD	1	TP53	176	ENST00000269305	5	61	0.5508	0.6672	0.5948	0.5116	0.2028
TP53:282:01:ENST00000269305	9	HNSC	1	TP53	282	ENST00000269305	8	177	0.5512	0.7603	0.5923	0.9337	0.7027
TP53:245:01:ENST00000269305	8	OV	1	TP53	245	ENST00000269305	8	208	0.5517	0.713	0.5636	0.6768	0.4083
NRIP1:516:01:ENST00000318948	5	UCEC	1	NRIP1	516	ENST00000318948	5	4	0.5556	NA	0.9995	0.2685	0.1143
NRIP1:729:01:ENST00000318948	5	UCEC	1	NRIP1	729	ENST00000318948	4	5	0.5556	0	0.9995	0.2685	0.1143
PTEN:233:01:ENST00000371953	26	UCEC	1	PTEN	233	ENST00000371953	24	141	0.5574	0.6425	0.5542	0.7964	0.4934
TP53:331:01:ENST00000269305	9	BLCA	1	TP53	331	ENST00000269305	7	84	0.5575	0.6408	0.5389	0.4221	0.2311
APC:1378:01:ENST00000257430	6	COAD	1	APC	1378	ENST00000257430	6	127	0.5575	1.554	0.5473	0.9716	0.8162
TP53:282:01:ENST00000269305	9	READ	1	TP53	282	ENST00000269305	8	29	0.5577	1.4867	0.5851	0.9753	0.821
CTCF:48:01:ENST00000264010	4	UCEC	1	CTCF	48	ENST00000264010	4	43	0.5597	0	0.9987	0.8362	0.567
THSD7B:1023:06:ENST00000272643	7	SKCM	6	THSD7B	1023	ENST00000272643	4	18	0.5599	0.5155	0.5274	0.9699	0.808
PTEN:290:01:ENST00000371953	6	UCEC	1	PTEN	290	ENST00000371953	6	159	0.5613	0	0.9978	0.9402	0.7307
CIC:1512:01:ENST00000575354	6	LGG	1	CIC	1512	ENST00000575354	6	24	0.5614	NA	NA	0.0142	0.0123
DNAH5:3236:06:ENST00000265104	8	SKCM	6	DNAH5	3236	ENST00000265104	6	20	0.5614	1.4303	0.5554	0.9974	0.942
TP53:248:01:ENST00000269305	13	GBM	1	TP53	248	ENST00000269305	12	36	0.5618	0.797	0.5859	0.7662	0.4545
PIK3R1:567:01:ENST00000521381	4	UCEC	1	PIK3R1	567	ENST00000521381	4	61	0.57	0	0.9986	0.67	0.4048
ASXL3:1370:06:ENST00000269197	7	SKCM	6	ASXL3	1370	ENST00000269197	6	4	0.5714	1.5623	0.5739	0.4794	0.1383
ASXL3:453:06:ENST00000269197	4	SKCM	6	ASXL3	453	ENST00000269197	4	6	0.5714	0.6401	0.5739	0.4794	0.1383
NFE2L2:82:01:ENST00000397062	5	UCEC	1	NFE2L2	82	ENST00000397062	5	5	0.5714	2.1583	0.5304	0.8604	0.5787
TTN:3271:06:ENST00000591111	5	SKCM	6	TTN	3271	ENST00000591111	4	24	0.5735	0.5483	0.5699	0.645	0.381
TP53:176:01:ENST00000269305	4	ESCA	1	TP53	176	ENST00000269305	4	60	0.5749	1.382	0.6016	0.4462	0.1433
TP53:238:01:ENST00000269305	5	OV	1	TP53	238	ENST00000269305	5	211	0.5751	1.99	0.3395	0.1586	0.1165
FBXW7:689:01:ENST00000281708	6	UCEC	1	FBXW7	689	ENST00000281708	4	47	0.577	2.0053	0.5255	0.9199	0.6933
FBXW7:465:01:ENST00000281708	15	COAD	1	FBXW7	465	ENST00000281708	10	19	0.5775	0.5366	0.5784	0.9849	0.862
DNAH5:742:06:ENST00000265104	5	SKCM	6	DNAH5	742	ENST00000265104	4	22	0.5781	0.5276	0.5445	0.2036	0.1214
PTEN:323:01:ENST00000371953	13	UCEC	1	PTEN	323	ENST00000371953	11	154	0.5793	0.6172	0.639	0.12	0.0257
TP53:175:01:ENST00000269305	5	PAAD	1	TP53	175	ENST00000269305	5	32	0.5798	0.6682	0.5908	0.9806	0.8405
TP53:163:01:ENST00000269305	7	LUSC	1	TP53	163	ENST00000269305	7	221	0.586	0.5217	0.5181	0.1491	0.0893
APC:1450:01:ENST00000257430	23	COAD	1	APC	1450	ENST00000257430	19	114	0.5868	1.3136	0.576	0.6633	0.386
VHL:130:01:ENST00000256474	4	KIRC	1	VHL	130	ENST00000256474	4	43	0.5868	0.5828	0.6028	0.9222	0.6991
TP53:282:01:ENST00000269305	7	LGG	1	TP53	282	ENST00000269305	7	135	0.5873	1.3126	0.657	0.5734	0.258
TP53:132:01:ENST00000269305	4	BLCA	1	TP53	132	ENST00000269305	4	87	0.5879	1.6484	0.4957	0.1918	0.1465
COL21A1:695:06:ENST00000244728	5	SKCM	6	COL21A1	695	ENST00000244728	5	8	0.589	0.4011	0.4798	0.3739	0.1509
CDKN2A:153:01:ENST00000304494	10	HNSC	1	CDKN2A	153	ENST00000304494	8	45	0.5893	0.7621	0.6172	0.9947	0.9171
TP53:179:01:ENST00000269305	4	PAAD	1	TP53	179	ENST00000269305	4	33	0.594	1.8274	0.4307	0.032	0.0511
PIK3CA:345:01:ENST00000263967	5	STAD	1	PIK3CA	345	ENST00000263967	4	23	0.5966	1.5422	0.5895	0.9364	0.7259
KMT2D:2354:01:ENST00000301067	10	UCEC	1	KMT2D	2354	ENST00000301067	10	12	0.5991	0.4692	0.5131	0.2296	0.0922
EGFR:598:01:ENST00000275493	4	LGG	1	EGFR	598	ENST00000275493	4	9	0.6014	1.7761	0.5298	0.1925	0.104
CTNNB1:41:01:ENST00000349496	5	COAD	1	CTNNB1	41	ENST00000349496	4	5	0.6032	0	0.9996	0.7381	0.4308
CTNNB1:45:01:ENST00000349496	7	COAD	1	CTNNB1	45	ENST00000349496	5	4	0.6032	NA	0.9996	0.7381	0.4308
GATA3:308:01:ENST00000346208	21	BRCA	1	GATA3	308	ENST00000346208	20	40	0.6039	0.7268	0.6277	0.1496	0.0481
TP53:282:01:ENST00000269305	5	PAAD	1	TP53	282	ENST00000269305	5	32	0.6068	1.3554	0.5913	0.915	0.6578
TP53:220:01:ENST00000269305	4	STAD	1	TP53	220	ENST00000269305	4	62	0.6089	0.5942	0.611	0.9297	0.712
TP53:135:01:ENST00000269305	4	BRCA	1	TP53	135	ENST00000269305	4	189	0.6092	1.7605	0.58	0.9798	0.8358
MORC1:55:06:ENST00000232603	4	SKCM	6	MORC1	55	ENST00000232603	4	6	0.6095	0.6478	0.621	0.7105	0.4096
CTNNB1:41:01:ENST00000349496	6	LIHC	1	CTNNB1	41	ENST00000349496	6	69	0.6115	0.5715	0.5848	0.896	0.6495
CCND1:287:01:ENST00000227507	6	UCEC	1	CCND1	287	ENST00000227507	5	12	0.6131	2.4495	0.5285	0.7607	0.4736
CTNNB1:45:01:ENST00000349496	5	UCEC	1	CTNNB1	45	ENST00000349496	4	84	0.6155	2.002	0.5106	0.9673	0.7917
TP53:261:01:ENST00000269305	5	OV	1	TP53	261	ENST00000269305	4	212	0.6174	1.3795	0.5837	0.9363	0.7015
HRAS:13:01:ENST00000311189	4	BLCA	1	HRAS	13	ENST00000311189	4	6	0.619	1.6526	0.6232	0.7171	0.3941
HRAS:61:01:ENST00000311189	6	BLCA	1	HRAS	61	ENST00000311189	6	4	0.619	0.6051	0.6232	0.7171	0.3941
SMAD4:361:01:ENST00000342988	4	READ	1	SMAD4	361	ENST00000342988	4	5	0.619	0.4082	0.5285	0.1741	0.0598
SMAD4:537:01:ENST00000342988	5	READ	1	SMAD4	537	ENST00000342988	5	4	0.619	2.4495	0.5285	0.1741	0.0598
PLCB4:876:06:ENST00000278655	4	SKCM	6	PLCB4	876	ENST00000278655	4	5	0.619	2.1077	0.5463	0.1003	0.0132
TP53:175:01:ENST00000269305	7	GBM	1	TP53	175	ENST00000269305	4	44	0.6293	0.5828	0.5982	0.0159	0.0269
TP53:331:01:ENST00000269305	4	COAD	1	TP53	331	ENST00000269305	4	97	0.6327	1.5567	0.6677	0.6741	0.4077
CTNNB1:33:01:ENST00000349496	27	UCEC	1	CTNNB1	33	ENST00000349496	26	62	0.6327	0.6375	0.5695	0.723	0.4255
FBXW7:479:01:ENST00000281708	6	UCEC	1	FBXW7	479	ENST00000281708	6	45	0.6331	0	0.9986	0.7197	0.4385
TP53:280:01:ENST00000269305	5	HNSC	1	TP53	280	ENST00000269305	5	180	0.6338	1.3676	0.5946	0.9661	0.7994
TP53:213:01:ENST00000269305	4	SARC	1	TP53	213	ENST00000269305	4	12	0.6341	0.5471	0.583	0.9887	0.8808
ZMYM2:1044:01:ENST00000382871	6	UCEC	1	ZMYM2	1044	ENST00000382871	5	4	0.6349	NA	0.9994	0.2071	0.073
ZMYM2:1250:01:ENST00000382871	4	UCEC	1	ZMYM2	1250	ENST00000382871	4	5	0.6349	0	0.9994	0.2071	0.073
PTPRT:695:06:ENST00000373187	4	SKCM	6	PTPRT	695	ENST00000373187	4	9	0.635	0.575	0.6224	0.5675	0.308
TP53:205:01:ENST00000269305	4	LUAD	1	TP53	205	ENST00000269305	4	82	0.6354	2.0632	0.4901	0.1046	0.0861
PIK3CA:542:01:ENST00000263967	12	LUSC	1	PIK3CA	542	ENST00000263967	11	22	0.638	1.3029	0.6309	0.7175	0.4276
PIK3CA:1047:01:ENST00000263967	6	LGG	1	PIK3CA	1047	ENST00000263967	6	7	0.6387	1.9433	0.589	0.6674	0.363
CTNNB1:45:01:ENST00000349496	17	LIHC	1	CTNNB1	45	ENST00000349496	16	59	0.6421	0.7982	0.6593	0.5031	0.2276
GATA3:350:01:ENST00000346208	4	BRCA	1	GATA3	350	ENST00000346208	4	56	0.6435	0	0.9989	0.7091	0.4378
TP53:175:01:ENST00000269305	19	BRCA	1	TP53	175	ENST00000269305	19	174	0.6441	1.3559	0.6213	0.8122	0.5303
PTEN:173:01:ENST00000371953	11	UCEC	1	PTEN	173	ENST00000371953	7	158	0.6491	1.3999	0.7434	0.9127	0.6751
PIK3CA:546:01:ENST00000263967	19	UCEC	1	PIK3CA	546	ENST00000263967	18	164	0.6507	1.2723	0.6998	0.9798	0.8404
TMC5:276:06:ENST00000396229	7	SKCM	6	TMC5	276	ENST00000396229	5	4	0.6508	NA	0.9996	0.7513	0.452
TMC5:690:06:ENST00000396229	6	SKCM	6	TMC5	690	ENST00000396229	4	5	0.6508	0	0.9996	0.7513	0.452
TP53:224:01:ENST00000269305	5	HNSC	1	TP53	224	ENST00000269305	4	181	0.6532	1.5252	0.5554	0.4953	0.3079
TP53:241:01:ENST00000269305	5	BLCA	1	TP53	241	ENST00000269305	5	86	0.6542	0.7975	0.7062	0.2831	0.0733
PTPRB:1560:06:ENST00000261266	5	SKCM	6	PTPRB	1560	ENST00000261266	4	4	0.6571	1.4142	0.6743	0.6065	0.239
PTPRB:529:06:ENST00000261266	4	SKCM	6	PTPRB	529	ENST00000261266	4	4	0.6571	0.7071	0.6743	0.6065	0.239
PIK3CA:545:01:ENST00000263967	24	HNSC	1	PIK3CA	545	ENST00000263967	22	31	0.6577	1.1944	0.6615	0.0716	0.0201
APC:805:01:ENST00000257430	7	COAD	1	APC	805	ENST00000257430	5	128	0.6584	0.6355	0.6559	0.683	0.3535
TP53:245:01:ENST00000269305	4	PAAD	1	TP53	245	ENST00000269305	4	33	0.6591	0.8052	0.7296	0.7361	0.3935
LMAN1:275:01:ENST00000251047	4	UCEC	1	LMAN1	275	ENST00000251047	4	10	0.6593	0	0.9995	0.9999	0.9876
LMAN1:305:01:ENST00000251047	11	UCEC	1	LMAN1	305	ENST00000251047	10	4	0.6593	NA	0.9995	0.9999	0.9876
TP53:248:01:ENST00000269305	16	UCEC	1	TP53	248	ENST00000269305	15	71	0.6593	0.6863	0.6167	0.6781	0.3936
CDKN2A:84:01:ENST00000304494	7	LUSC	1	CDKN2A	84	ENST00000304494	6	11	0.6601	0.7467	0.6694	0.5419	0.2815
APC:564:01:ENST00000257430	6	COAD	1	APC	564	ENST00000257430	4	129	0.663	1.6062	0.6429	0.4939	0.2944
TP53:248:01:ENST00000269305	13	HNSC	1	TP53	248	ENST00000269305	13	172	0.6638	0.837	0.6737	0.7365	0.4559
PCBP1:100:01:ENST00000303577	8	COAD	1	PCBP1	100	ENST00000303577	8	4	0.6667	0	0.9996	0.8003	0.4886
PCBP1:102:01:ENST00000303577	5	COAD	1	PCBP1	102	ENST00000303577	4	8	0.6667	NA	0.9996	0.8003	0.4886
PIK3CA:345:01:ENST00000263967	8	UCEC	1	PIK3CA	345	ENST00000263967	8	174	0.6675	1.3352	0.7783	0.59	0.336
KRAS:12:01:ENST00000256078	40	READ	1	KRAS	12	ENST00000256078	34	10	0.6685	0.7349	0.7158	0.9984	0.9628
PIK3CA:118:01:ENST00000263967	5	BRCA	1	PIK3CA	118	ENST00000263967	5	266	0.6691	1.5455	0.6697	0.972	0.8075
NRAS:61:06:ENST00000369535	94	SKCM	6	NRAS	61	ENST00000369535	86	4	0.6696	0.7657	0.6561	0.7502	0.4023
NRAS:12:06:ENST00000369535	5	SKCM	6	NRAS	12	ENST00000369535	4	86	0.6703	1.3061	0.6561	0.7502	0.4023
TP53:248:01:ENST00000269305	19	COAD	1	TP53	248	ENST00000269305	19	82	0.6715	0.7928	0.6748	0.7757	0.4705
TP53:337:01:ENST00000269305	6	LUAD	1	TP53	337	ENST00000269305	4	82	0.6731	1.8435	0.5551	0.3233	0.1961
CDKN2A:80:01:ENST00000304494	6	PAAD	1	CDKN2A	80	ENST00000304494	6	5	0.6753	1.4047	0.6603	0.884	0.6154
CDKN2A:83:01:ENST00000304494	5	PAAD	1	CDKN2A	83	ENST00000304494	5	6	0.6753	0.7119	0.6603	0.884	0.6154
TP53:173:01:ENST00000269305	4	LGG	1	TP53	173	ENST00000269305	4	138	0.6784	0	0.9973	0.2504	0.1498
XIRP2:2264:06:ENST00000628543	6	SKCM	6	XIRP2	2264	ENST00000628543	6	8	0.6833	1.3175	0.6973	0.9961	0.9291
BRINP3:497:06:ENST00000367462	5	SKCM	6	BRINP3	497	ENST00000367462	4	4	0.6857	0.5774	0.5901	0.684	0.3861
BRINP3:618:06:ENST00000367462	4	SKCM	6	BRINP3	618	ENST00000367462	4	4	0.6857	1.7321	0.5901	0.684	0.3861
NIPBL:2776:01:ENST00000282516	11	UCEC	1	NIPBL	2776	ENST00000282516	10	6	0.6858	0.8148	0.8695	0.1633	0.0729
NIPBL:603:01:ENST00000282516	6	UCEC	1	NIPBL	603	ENST00000282516	6	10	0.6858	1.2274	0.8695	0.1633	0.0729
CDKN2A:114:06:ENST00000304494	9	SKCM	6	CDKN2A	114	ENST00000304494	6	16	0.6868	1.3387	0.682	0.9998	0.9855
EGFR:598:01:ENST00000275493	14	GBM	1	EGFR	598	ENST00000275493	13	32	0.692	0.8815	0.7386	0.9326	0.7059
TP53:193:01:ENST00000269305	9	BRCA	1	TP53	193	ENST00000269305	9	184	0.6922	0	0.997	0.0241	0.0198
TP53:126:01:ENST00000269305	5	LIHC	1	TP53	126	ENST00000269305	5	15	0.6925	0.7333	0.7064	0.174	0.0397
TP53:331:01:ENST00000269305	7	LUSC	1	TP53	331	ENST00000269305	7	221	0.6952	0.6043	0.6175	0.0194	0.0215
FGFR2:549:01:ENST00000358487	11	UCEC	1	FGFR2	549	ENST00000358487	6	28	0.6965	0	0.9992	0.4375	0.2278
TP53:286:01:ENST00000269305	5	LUAD	1	TP53	286	ENST00000269305	5	81	0.6975	1.3181	0.7092	0.996	0.9279
APC:499:01:ENST00000257430	7	COAD	1	APC	499	ENST00000257430	6	127	0.6977	0.6534	0.6757	0.9729	0.8142
TP53:245:01:ENST00000269305	4	COAD	1	TP53	245	ENST00000269305	4	97	0.7004	0	0.9979	0.0452	0.0466
PTEN:268:01:ENST00000371953	9	UCEC	1	PTEN	268	ENST00000371953	8	157	0.7014	0	0.9979	0.9865	0.8707
TP53:125:01:ENST00000269305	4	HNSC	1	TP53	125	ENST00000269305	4	181	0.7015	1.4102	0.6312	0.354	0.2308
KDM6A:1293:01:ENST00000377967	4	BLCA	1	KDM6A	1293	ENST00000377967	4	8	0.703	2.2112	0.5246	0.0704	0.0437
KDM6A:555:01:ENST00000377967	8	BLCA	1	KDM6A	555	ENST00000377967	8	4	0.703	0.4522	0.5246	0.0704	0.0437
TP53:282:01:ENST00000269305	5	UCEC	1	TP53	282	ENST00000269305	5	81	0.7033	1.5943	0.6546	0.536	0.3082
TP53:245:01:ENST00000269305	5	BRCA	1	TP53	245	ENST00000269305	5	188	0.7073	1.5085	0.6906	0.957	0.7606
TP53:342:01:ENST00000269305	4	OV	1	TP53	342	ENST00000269305	4	212	0.7082	1.1957	0.727	0.2385	0.0179
ARID1A:1407:01:ENST00000324856	4	UCEC	1	ARID1A	1407	ENST00000324856	4	73	0.7104	0	0.9989	0.1469	0.0992
PIK3CA:1043:01:ENST00000263967	10	UCEC	1	PIK3CA	1043	ENST00000263967	7	175	0.7134	1.3336	0.7788	0.5061	0.2107
PTEN:127:01:ENST00000371953	6	UCEC	1	PTEN	127	ENST00000371953	5	160	0.7142	1.5651	0.663	0.8898	0.6161
MBD6:671:01:ENST00000355673	5	UCEC	1	MBD6	671	ENST00000355673	5	5	0.7143	NA	0.9996	0.3917	0.1775
MBD6:734:01:ENST00000355673	7	UCEC	1	MBD6	734	ENST00000355673	5	5	0.7143	0	0.9996	0.3917	0.1775
APC:941:01:ENST00000257430	4	COAD	1	APC	941	ENST00000257430	4	129	0.7158	0	0.997	0.0085	0.0192
PIK3CA:1047:01:ENST00000263967	15	HNSC	1	PIK3CA	1047	ENST00000263967	14	39	0.7172	0.8233	0.7021	0.163	0.0738
PTEN:342:01:ENST00000371953	5	UCEC	1	PTEN	342	ENST00000371953	4	161	0.7195	1.6088	0.6439	0.8843	0.6057
PTEN:212:01:ENST00000371953	7	UCEC	1	PTEN	212	ENST00000371953	7	158	0.7217	0	0.9978	0.1268	0.0746
TP53:176:01:ENST00000269305	9	OV	1	TP53	176	ENST00000269305	8	208	0.7255	0.856	0.7604	0.9822	0.8527
APC:1556:01:ENST00000257430	12	COAD	1	APC	1556	ENST00000257430	9	124	0.728	1.1948	0.7707	0.8721	0.5897
TP53:242:01:ENST00000269305	6	LUSC	1	TP53	242	ENST00000269305	5	223	0.7282	0.8001	0.7558	0.9443	0.7277
PIK3CA:1047:01:ENST00000263967	7	LUSC	1	PIK3CA	1047	ENST00000263967	7	26	0.7285	1.3071	0.6883	0.5286	0.2881
TP53:273:01:ENST00000269305	8	BLCA	1	TP53	273	ENST00000269305	7	84	0.7295	1.2022	0.7262	0.7903	0.4704
MGAM:1091:06:ENST00000549489	4	SKCM	6	MGAM	1091	ENST00000549489	4	5	0.7302	1.4011	0.7149	0.376	0.0828
PTEN:267:01:ENST00000371953	10	UCEC	1	PTEN	267	ENST00000371953	9	156	0.7342	0.7558	0.786	0.7711	0.4565
TP53:220:01:ENST00000269305	5	ESCA	1	TP53	220	ENST00000269305	4	60	0.7364	1.8429	0.5577	0.0041	0.0163
TP53:173:01:ENST00000269305	7	HNSC	1	TP53	173	ENST00000269305	7	178	0.7364	0.8195	0.7363	0.7315	0.4027
TP53:195:01:ENST00000269305	12	OV	1	TP53	195	ENST00000269305	12	204	0.7368	1.1894	0.6796	0.7029	0.4275
MROH2B:173:06:ENST00000399564	6	SKCM	6	MROH2B	173	ENST00000399564	4	4	0.7429	1.9441	0.479	0.3679	0.1383
CTNNB1:33:01:ENST00000349496	12	LIHC	1	CTNNB1	33	ENST00000349496	12	63	0.7442	1.1551	0.7791	0.5807	0.2769
TP53:331:01:ENST00000269305	4	HNSC	1	TP53	331	ENST00000269305	4	181	0.7466	0.8108	0.7699	0.8203	0.5027
TP53:242:01:ENST00000269305	5	BRCA	1	TP53	242	ENST00000269305	5	188	0.7477	1.3964	0.7439	0.9967	0.9338
PIK3CA:88:01:ENST00000263967	31	UCEC	1	PIK3CA	88	ENST00000263967	17	165	0.748	0.6315	0.6538	0.6706	0.3881
CTNNB1:34:01:ENST00000349496	14	UCEC	1	CTNNB1	34	ENST00000349496	14	74	0.7559	0.6155	0.6459	0.7808	0.4717
TP53:179:01:ENST00000269305	4	STAD	1	TP53	179	ENST00000269305	4	62	0.7565	0.7	0.7281	0.8448	0.5811
CTNNB1:32:01:ENST00000349496	17	LIHC	1	CTNNB1	32	ENST00000349496	17	58	0.7592	1.1608	0.7701	0.9144	0.6763
FBXW7:367:01:ENST00000281708	5	COAD	1	FBXW7	367	ENST00000281708	4	25	0.7602	0	0.999	0.2687	0.1481
GATA3:330:01:ENST00000346208	6	BRCA	1	GATA3	330	ENST00000346208	6	54	0.7606	1.4149	0.7469	0.9858	0.8676
APC:1397:01:ENST00000257430	6	COAD	1	APC	1397	ENST00000257430	6	127	0.7627	1.1737	0.8269	0.7927	0.4768
PIK3R1:457:01:ENST00000521381	5	UCEC	1	PIK3R1	457	ENST00000521381	5	60	0.7627	0	0.998	0.2057	0.1188
CDKN2A:58:01:ENST00000304494	11	HNSC	1	CDKN2A	58	ENST00000304494	10	43	0.7641	1.1762	0.7449	0.7558	0.4725
TP53:248:01:ENST00000269305	11	READ	1	TP53	248	ENST00000269305	8	29	0.7658	0.7965	0.7772	0.8204	0.5201
STK11:245:01:ENST00000326873	4	LUAD	1	STK11	245	ENST00000326873	4	6	0.7714	0.7536	0.7629	0.9222	0.6901
STK11:53:01:ENST00000326873	6	LUAD	1	STK11	53	ENST00000326873	6	4	0.7714	1.327	0.7629	0.9222	0.6901
TP53:272:01:ENST00000269305	6	OV	1	TP53	272	ENST00000269305	6	210	0.7758	0.8701	0.8137	0.8555	0.5595
SPOP:87:01:ENST00000347630	7	PRAD	1	SPOP	87	ENST00000347630	7	41	0.777	0	0.9994	0.3863	0.2004
PTEN:92:01:ENST00000371953	8	UCEC	1	PTEN	92	ENST00000371953	7	158	0.7867	1.2491	0.8289	0.7612	0.4824
PTEN:132:01:ENST00000371953	4	GBM	1	PTEN	132	ENST00000371953	4	15	0.7879	0.9125	0.8772	0.6584	0.2249
APC:1429:01:ENST00000257430	4	COAD	1	APC	1429	ENST00000257430	4	129	0.7882	1.3272	0.7814	0.7898	0.5244
PIK3CA:1047:01:ENST00000263967	41	UCEC	1	PIK3CA	1047	ENST00000263967	41	141	0.7905	0.8446	0.7615	0.9674	0.7984
TP53:152:01:ENST00000269305	4	LUAD	1	TP53	152	ENST00000269305	4	82	0.7916	1.4082	0.7392	0.4316	0.251
KRAS:13:01:ENST00000256078	8	LUAD	1	KRAS	13	ENST00000256078	8	121	0.7918	0.8595	0.8013	0.639	0.3164
TP53:275:01:ENST00000269305	5	LGG	1	TP53	275	ENST00000269305	4	138	0.7919	1.3855	0.7505	0.9984	0.9552
PIK3R1:376:01:ENST00000521381	4	UCEC	1	PIK3R1	376	ENST00000521381	4	61	0.7934	1.441	0.7293	0.8112	0.4964
APC:554:01:ENST00000257430	4	COAD	1	APC	554	ENST00000257430	4	129	0.7983	0.7484	0.7762	0.8033	0.4959
TP53:175:01:ENST00000269305	12	HNSC	1	TP53	175	ENST00000269305	12	173	0.7985	1.1082	0.794	0.8718	0.5872
TP53:105:01:ENST00000269305	5	LUSC	1	TP53	105	ENST00000269305	5	223	0.8017	0.8921	0.8464	0.3998	0.1254
PIK3CA:108:01:ENST00000263967	9	UCEC	1	PIK3CA	108	ENST00000263967	6	176	0.8031	1.282	0.8089	0.5409	0.2366
VHL:115:01:ENST00000256474	4	KIRC	1	VHL	115	ENST00000256474	4	43	0.8042	0	0.9978	0	0.0008
CDH1:23:01:ENST00000261769	9	BRCA	1	CDH1	23	ENST00000261769	9	10	0.805	0	0.9996	0.8972	0.6429
PIK3R1:582:01:ENST00000521381	13	UCEC	1	PIK3R1	582	ENST00000521381	12	53	0.8086	0.6967	0.7329	0.0302	0.0172
PIK3CA:545:01:ENST00000263967	5	UCS	1	PIK3CA	545	ENST00000263967	5	4	0.8095	0.6325	0.5789	0.3679	0.1383
TP53:157:01:ENST00000269305	4	BRCA	1	TP53	157	ENST00000269305	4	189	0.8125	0	0.9977	0.4798	0.2769
PIK3CA:420:01:ENST00000263967	7	UCEC	1	PIK3CA	420	ENST00000263967	7	175	0.813	0	0.9973	0.0241	0.0227
TP53:282:01:ENST00000269305	6	LUSC	1	TP53	282	ENST00000269305	6	222	0.8201	1.1437	0.8195	0.9378	0.7106
TP53:196:01:ENST00000269305	5	LGG	1	TP53	196	ENST00000269305	5	137	0.8214	0.8691	0.8515	0.2929	0.0746
TP53:266:01:ENST00000269305	6	LUSC	1	TP53	266	ENST00000269305	5	223	0.8234	1.208	0.7919	0.925	0.7026
TP53:157:01:ENST00000269305	5	OV	1	TP53	157	ENST00000269305	5	211	0.8237	0.8753	0.852	0.7116	0.4478
NFE2L2:79:01:ENST00000397062	10	LUSC	1	NFE2L2	79	ENST00000397062	9	40	0.8248	0.8231	0.7996	0.2993	0.1484
TP53:158:01:ENST00000269305	4	GBM	1	TP53	158	ENST00000269305	4	44	0.829	0.93	0.8957	0.3059	0.0361
VHL:117:01:ENST00000256474	5	KIRC	1	VHL	117	ENST00000256474	5	42	0.8308	1.1894	0.8188	1	0.9929
TP53:195:01:ENST00000269305	5	BRCA	1	TP53	195	ENST00000269305	4	189	0.8337	0	0.9977	0.4766	0.2737
PIK3CA:1047:01:ENST00000263967	17	STAD	1	PIK3CA	1047	ENST00000263967	7	20	0.8347	1.1486	0.8415	0.9369	0.7141
CHD4:1105:01:ENST00000357008	11	UCEC	1	CHD4	1105	ENST00000357008	10	18	0.8416	1.1895	0.8496	0.689	0.381
TP53:307:01:ENST00000269305	4	HNSC	1	TP53	307	ENST00000269305	4	181	0.8445	0.8801	0.8587	0.7635	0.4294
TP53:214:01:ENST00000269305	4	LUSC	1	TP53	214	ENST00000269305	4	224	0.8453	1.3429	0.7701	0.1794	0.1268
CHD4:975:01:ENST00000357008	6	UCEC	1	CHD4	975	ENST00000357008	6	22	0.8455	1.0956	0.9351	0.9874	0.8744
TP53:273:01:ENST00000269305	13	HNSC	1	TP53	273	ENST00000269305	12	173	0.8457	0.9336	0.8615	0.4345	0.1646
TP53:135:01:ENST00000269305	7	ESCA	1	TP53	135	ENST00000269305	7	57	0.8472	1.1433	0.8285	0.9998	0.9849
TP53:135:01:ENST00000269305	4	LUSC	1	TP53	135	ENST00000269305	4	224	0.8475	1.3335	0.7753	0.2093	0.1422
NRAS:12:01:ENST00000369535	7	COAD	1	NRAS	12	ENST00000369535	6	6	0.8485	0.5834	0.6605	0.8625	0.5867
NRAS:61:01:ENST00000369535	7	COAD	1	NRAS	61	ENST00000369535	6	6	0.8485	1.714	0.6605	0.8625	0.5867
TP53:157:01:ENST00000269305	15	LUSC	1	TP53	157	ENST00000269305	14	214	0.8485	1.0895	0.8394	0.9854	0.8669
TP53:187:01:ENST00000269305	5	BRCA	1	TP53	187	ENST00000269305	5	188	0.8501	0.7696	0.7981	0.6226	0.2967
TP53:132:01:ENST00000269305	5	BRCA	1	TP53	132	ENST00000269305	5	188	0.8509	0.7709	0.7988	0.5472	0.2355
TPTE:423:06:ENST00000618007	5	SKCM	6	TPTE	423	ENST00000618007	4	8	0.8525	0.8573	0.8341	0.944	0.7375
TP53:163:01:ENST00000269305	4	LUAD	1	TP53	163	ENST00000269305	4	82	0.8542	0.7964	0.8236	0.8839	0.6356
ACVR2A:437:01:ENST00000241416	25	UCEC	1	ACVR2A	437	ENST00000241416	23	7	0.8543	0.8983	0.926	0.9729	0.8164
PIK3CA:545:01:ENST00000263967	37	CESC	1	PIK3CA	545	ENST00000263967	29	20	0.857	1.1045	0.8589	0.7205	0.4171
APC:216:01:ENST00000257430	11	COAD	1	APC	216	ENST00000257430	10	123	0.8588	0.8515	0.8261	0.8371	0.5604
TP53:193:01:ENST00000269305	4	LGG	1	TP53	193	ENST00000269305	4	138	0.8603	1.2011	0.8576	0.9856	0.868
TP53:179:01:ENST00000269305	8	BRCA	1	TP53	179	ENST00000269305	8	185	0.8608	0	0.9979	0.0002	0.0016
NFE2L2:30:01:ENST00000397062	4	LUSC	1	NFE2L2	30	ENST00000397062	4	45	0.8625	1.2937	0.8072	0.5188	0.3013
TP53:179:01:ENST00000269305	4	GBM	1	TP53	179	ENST00000269305	4	44	0.8628	0.9373	0.9161	0.7929	0.4598
INPPL1:976:01:ENST00000298229	11	UCEC	1	INPPL1	976	ENST00000298229	11	15	0.8656	1.0915	0.9245	0.9318	0.7091
BRAF:600:01:ENST00000288602	10	LUAD	1	BRAF	600	ENST00000288602	9	11	0.8673	1.1208	0.8662	0.6979	0.4002
KRAS:146:01:ENST00000256078	13	COAD	1	KRAS	146	ENST00000256078	10	131	0.8733	0.8628	0.8402	0.9484	0.7441
TPTE:123:06:ENST00000618007	7	SKCM	6	TPTE	123	ENST00000618007	5	7	0.8737	0.8879	0.8675	0.9979	0.9487
TP53:241:01:ENST00000269305	7	OV	1	TP53	241	ENST00000269305	6	210	0.8807	0.9552	0.9284	0.7935	0.4658
TP53:225:01:ENST00000269305	5	BRCA	1	TP53	225	ENST00000269305	5	188	0.881	1.0926	0.9311	0.9539	0.7538
TP53:337:01:ENST00000269305	5	HNSC	1	TP53	337	ENST00000269305	5	180	0.881	0.8944	0.876	0.5574	0.3319
KRAS:61:01:ENST00000256078	7	COAD	1	KRAS	61	ENST00000256078	5	136	0.8814	0.8375	0.8617	0.9988	0.9645
TP53:159:01:ENST00000269305	4	BLCA	1	TP53	159	ENST00000269305	4	87	0.8818	1.121	0.8753	0.785	0.5208
TP53:298:01:ENST00000269305	5	LUSC	1	TP53	298	ENST00000269305	4	224	0.8822	0.9147	0.902	0.5547	0.2329
TP53:213:01:ENST00000269305	11	HNSC	1	TP53	213	ENST00000269305	11	174	0.8846	1.0692	0.8749	0.6364	0.3146
TP53:110:01:ENST00000269305	5	HNSC	1	TP53	110	ENST00000269305	5	180	0.8853	0.8985	0.8812	0.9913	0.8928
TP53:273:01:ENST00000269305	9	ESCA	1	TP53	273	ENST00000269305	9	55	0.8935	1.0843	0.8818	0.9943	0.9126
TP53:273:01:ENST00000269305	10	LUAD	1	TP53	273	ENST00000269305	5	81	0.9001	1.0773	0.9199	0.9953	0.9216
PIK3CA:542:01:ENST00000263967	18	HNSC	1	PIK3CA	542	ENST00000263967	17	36	0.9009	0.9449	0.8992	0.6709	0.3821
VHL:114:01:ENST00000256474	7	KIRC	1	VHL	114	ENST00000256474	7	40	0.9022	1.088	0.8956	0.9559	0.765
TP53:241:01:ENST00000269305	10	UCEC	1	TP53	241	ENST00000269305	9	77	0.9115	0.8287	0.8562	0.233	0.1194
PTEN:173:01:ENST00000371953	5	GBM	1	PTEN	173	ENST00000371953	4	15	0.9143	1.0021	0.9972	0.6584	0.2249
BRAF:466:01:ENST00000288602	6	LUAD	1	BRAF	466	ENST00000288602	4	16	0.9143	0.9204	0.9187	0.493	0.1918
PCDH15:1522:06:ENST00000617271	4	SKCM	6	PCDH15	1522	ENST00000617271	4	4	0.9143	0.866	0.9192	0.9255	0.6928
PCDH15:764:06:ENST00000320301	5	SKCM	6	PCDH15	764	ENST00000320301	4	4	0.9143	1.1547	0.9192	0.9255	0.6928
ARID1A:1072:01:ENST00000324856	7	UCEC	1	ARID1A	1072	ENST00000324856	7	70	0.9157	0	0.9987	0.3106	0.1631
TP53:175:01:ENST00000269305	5	SARC	1	TP53	175	ENST00000269305	5	11	0.9194	1.0943	0.9182	0.8364	0.5376
GATA3:408:01:ENST00000346208	14	BRCA	1	GATA3	408	ENST00000346208	12	48	0.9215	1.0439	0.9532	0.6418	0.3311
MKI67:1857:01:ENST00000368654	7	UCEC	1	MKI67	1857	ENST00000368654	7	6	0.9231	0.9258	0.9566	0.9994	0.9722
MKI67:233:01:ENST00000368654	4	UCEC	1	MKI67	233	ENST00000368654	4	9	0.9231	2.1213	0.595	0.9921	0.9003
TP53:176:01:ENST00000269305	6	BRCA	1	TP53	176	ENST00000269305	6	187	0.9233	1.0625	0.9526	0.9832	0.8521
CDKN2A:80:01:ENST00000304494	20	HNSC	1	CDKN2A	80	ENST00000304494	19	34	0.9259	0.9638	0.9269	0.3798	0.1552
PIK3CA:420:01:ENST00000263967	5	BRCA	1	PIK3CA	420	ENST00000263967	5	266	0.9284	0	0.9978	0.0005	0.0047
TP53:136:01:ENST00000269305	5	HNSC	1	TP53	136	ENST00000269305	5	180	0.9295	0.9572	0.9408	0.9934	0.9099
CHD4:1162:01:ENST00000357008	6	UCEC	1	CHD4	1162	ENST00000357008	6	22	0.9307	1.006	0.9958	0.9521	0.7576
PIK3CA:1047:01:ENST00000263967	133	BRCA	1	PIK3CA	1047	ENST00000263967	129	142	0.9331	1.0298	0.9312	0.8378	0.554
ACVR2A:96:01:ENST00000241416	8	UCEC	1	ACVR2A	96	ENST00000241416	8	22	0.9342	0.8611	0.8971	0.9481	0.7468
PIK3CA:344:01:ENST00000263967	7	UCEC	1	PIK3CA	344	ENST00000263967	7	175	0.935	0.9411	0.9528	0.5522	0.2464
BRAF:469:01:ENST00000288602	8	LUAD	1	BRAF	469	ENST00000288602	7	13	0.9351	0.9417	0.933	0.9692	0.8036
TP53:248:01:ENST00000269305	9	STAD	1	TP53	248	ENST00000269305	7	59	0.9363	1.0655	0.9317	0.334	0.1815
FBXW7:465:01:ENST00000281708	6	CESC	1	FBXW7	465	ENST00000281708	5	4	0.9365	1.4142	0.8092	0.518	0.2316
FBXW7:505:01:ENST00000281708	7	CESC	1	FBXW7	505	ENST00000281708	4	5	0.9365	0.7071	0.8092	0.518	0.2316
PIK3CA:118:01:ENST00000263967	4	LGG	1	PIK3CA	118	ENST00000263967	4	9	0.9371	1.1699	0.8986	0.9993	0.9708
TP53:158:01:ENST00000269305	7	LUAD	1	TP53	158	ENST00000269305	5	81	0.9373	0.9342	0.9268	0.4602	0.1756
TP53:273:01:ENST00000269305	16	STAD	1	TP53	273	ENST00000269305	11	55	0.9382	1.0397	0.9379	0.5647	0.2643
PIK3CA:545:01:ENST00000263967	69	BRCA	1	PIK3CA	545	ENST00000263967	60	211	0.9415	0.9575	0.9233	0.1431	0.0556
CTNNB1:37:01:ENST00000349496	6	LIHC	1	CTNNB1	37	ENST00000349496	5	70	0.9452	1.0358	0.9728	0.2875	0.1668
ARID1A:1326:01:ENST00000324856	5	UCEC	1	ARID1A	1326	ENST00000324856	5	72	0.9467	0	0.9985	0.5315	0.3006
TP53:179:01:ENST00000269305	4	UCEC	1	TP53	179	ENST00000269305	4	82	0.951	1.0134	0.9897	0.9641	0.782
CDH6:524:06:ENST00000265071	6	SKCM	6	CDH6	524	ENST00000265071	5	4	0.9524	1.0044	0.9962	0.8353	0.545
CDH6:722:06:ENST00000265071	5	SKCM	6	CDH6	722	ENST00000265071	4	5	0.9524	0.9956	0.9962	0.8353	0.545
ARID5B:456:01:ENST00000279873	4	UCEC	1	ARID5B	456	ENST00000279873	4	11	0.9524	1.5811	0.7523	0.8993	0.6401
ARID5B:497:01:ENST00000279873	11	UCEC	1	ARID5B	497	ENST00000279873	11	4	0.9524	0.6325	0.7523	0.8993	0.6401
TP53:220:01:ENST00000269305	5	GBM	1	TP53	220	ENST00000269305	5	43	0.9544	1.0748	0.9066	0.8839	0.6368
SPOP:133:01:ENST00000347630	19	PRAD	1	SPOP	133	ENST00000347630	19	29	0.9561	0	0.9994	0.9744	0.8195
TP53:285:01:ENST00000269305	10	BLCA	1	TP53	285	ENST00000269305	10	81	0.9567	0.9694	0.9529	0.8439	0.5731
TP53:213:01:ENST00000269305	4	PAAD	1	TP53	213	ENST00000269305	4	33	0.957	0.9936	0.9932	0.8523	0.5931
TP53:220:01:ENST00000269305	8	OV	1	TP53	220	ENST00000269305	8	208	0.9609	1.0419	0.9286	0.9254	0.6833
PPP2R1A:257:01:ENST00000322088	4	UCEC	1	PPP2R1A	257	ENST00000322088	4	44	0.9614	0.9367	0.9503	0.9965	0.9334
XIRP2:656:06:ENST00000628543	6	SKCM	6	XIRP2	656	ENST00000628543	5	9	0.964	0.9721	0.9693	0.918	0.6691
TP53:110:01:ENST00000269305	5	BRCA	1	TP53	110	ENST00000269305	5	188	0.9643	0.8429	0.8673	0.7155	0.3872
KRAS:12:01:ENST00000256078	136	LUAD	1	KRAS	12	ENST00000256078	118	11	0.9652	0.9854	0.9777	0.8894	0.6187
MUC16:5119:06:ENST00000397910	8	SKCM	6	MUC16	5119	ENST00000397910	5	7	0.9697	1.0538	0.9468	0.3355	0.0703
TP53:238:01:ENST00000269305	4	BRCA	1	TP53	238	ENST00000269305	4	189	0.9708	0	0.9975	0.0519	0.0518
PCLO:4133:06:ENST00000333891	5	SKCM	6	PCLO	4133	ENST00000333891	5	11	0.9721	1.0411	0.9562	0.8247	0.5493
JAK1:430:01:ENST00000342505	5	UCEC	1	JAK1	430	ENST00000342505	5	40	0.9732	1.007	0.9948	0.6931	0.3682
VHL:155:01:ENST00000256474	10	KIRC	1	VHL	155	ENST00000256474	10	37	0.9811	0.9879	0.9848	0.464	0.2435
TP53:159:01:ENST00000269305	4	LUSC	1	TP53	159	ENST00000269305	4	224	0.9812	1.0336	0.9738	0.2388	0.1561
FGFR3:249:01:ENST00000260795	30	BLCA	1	FGFR3	249	ENST00000260795	29	12	0.9821	1.0446	0.9566	0.618	0.3388
EGFR:108:01:ENST00000275493	5	GBM	1	EGFR	108	ENST00000275493	5	40	0.9841	1.0444	0.9352	0.9339	0.6998
PIK3CA:542:01:ENST00000263967	5	STAD	1	PIK3CA	542	ENST00000263967	4	23	0.9856	0.9559	0.9661	0.8764	0.5936
JAK1:860:01:ENST00000342505	41	UCEC	1	JAK1	860	ENST00000342505	41	4	0.9873	0.937	0.9521	0.7062	0.3765
THSD7B:1180:06:ENST00000272643	8	SKCM	6	THSD7B	1180	ENST00000272643	5	17	0.9879	1.0282	0.9675	0.8348	0.5619
TP53:273:01:ENST00000269305	20	BRCA	1	TP53	273	ENST00000269305	20	173	0.9927	0.9832	0.975	0.5375	0.2482
CTNNB1:387:01:ENST00000349496	5	LIHC	1	CTNNB1	387	ENST00000349496	5	70	0.9993	0.9468	0.9577	0.4362	0.2458
NRAS:12:01:ENST00000369535	5	READ	1	NRAS	12	ENST00000369535	5	5	1	0.8944	0.9372	0.2266	0.0958
NRAS:61:01:ENST00000369535	7	READ	1	NRAS	61	ENST00000369535	5	5	1	1.118	0.9372	0.2266	0.0958
