# Supplementary material for: The Impact of Mutational Hotspots on Cancer Survival
Source: Cancers (Basel). 2024 Mar 6;16(5):1072. doi: 10.3390/cancers16051072 (PMC10931094; doi:10.3390/cancers16051072)
Supplement: Supplementary file 1 [file cancers-16-01072-s001.zip › supplementary Table S4 - Hotspot X vs. Hotspot Y.xlsx]

## Sheet: Hotspot X vs Hotspot Y
Hotspot ID	TCGA Mutated Samples	Cancer	Site	Gene	Position	Transcript	n With HotSpot	n Without HotSpot	p Valorate	Hazard Ratio	p Hazard Ratio	p Log Rank	p Cox PH
TP53:176:01:ENST00000269305	5	LUSC	1	TP53	176 vs 278	ENST00000269305	5	10	0.0013	18.7757	0.0085	0.5761	0.1613
TP53:163:01:ENST00000269305	7	HNSC	1	TP53	163 vs 306	ENST00000269305	7	6	0.0023	0	0.9992	0.9005	0.6603
TP53:125:01:ENST00000269305	7	LUSC	1	TP53	125 vs 176	ENST00000269305	7	5	0.0025	0	0.9991	0.547	0.1473
EGFR:746:01:ENST00000275493	15	LUAD	1	EGFR	746 vs 858	ENST00000275493	15	21	0.0033	0.1992	0.0135	0.9923	0.8939
TP53:175:01:ENST00000269305	15	OV	1	TP53	175 vs 266	ENST00000269305	15	5	0.0035	0.1834	0.0129	0.3714	0.0623
TP53:158:01:ENST00000269305	16	LUSC	1	TP53	158 vs 176	ENST00000269305	16	5	0.0041	0.1382	0.0041	0.6829	0.2331
TP53:220:01:ENST00000269305	5	HNSC	1	TP53	220 vs 306	ENST00000269305	5	6	0.0043	0	0.9991	0.9998	0.9855
TP53:179:01:ENST00000269305	5	OV	1	TP53	179 vs 248	ENST00000269305	5	21	0.0047	0.1241	0.0479	0.8417	0.5535
TP53:126:01:ENST00000269305	6	LUSC	1	TP53	126 vs 278	ENST00000269305	6	10	0.005	16.1058	0.0148	0.9075	0.6691
TP53:193:01:ENST00000269305	9	HNSC	1	TP53	193 vs 220	ENST00000269305	9	5	0.006	NA	0.9989	0.9557	0.7611
TP53:234:01:ENST00000269305	9	LUSC	1	TP53	234 vs 278	ENST00000269305	9	10	0.0071	8.9247	0.0413	0.111	0.0238
TP53:176:01:ENST00000269305	5	LUSC	1	TP53	176 vs 242	ENST00000269305	5	5	0.0079	NA	0.9991	0.4185	0.1134
TP53:220:01:ENST00000269305	5	LUSC	1	TP53	220 vs 278	ENST00000269305	5	10	0.0087	11.6468	0.0289	0.8048	0.4832
TP53:176:01:ENST00000269305	6	BRCA	1	TP53	176 vs 194	ENST00000269305	6	4	0.0095	0	0.9999	0.0437	0.0091
TP53:126:01:ENST00000269305	6	LUSC	1	TP53	126 vs 172	ENST00000269305	6	4	0.0095	NA	0.9992	0.9997	0.9792
TP53:126:01:ENST00000269305	6	LUSC	1	TP53	126 vs 225	ENST00000269305	6	4	0.0095	NA	0.9992	0.9879	0.8767
TP53:282:01:ENST00000269305	8	HNSC	1	TP53	282 vs 306	ENST00000269305	8	6	0.0107	0.0614	0.0124	0.4493	0.1668
TP53:125:01:ENST00000269305	4	LGG	1	TP53	125 vs 248	ENST00000269305	4	13	0.0109	14.3223	0.0235	0.9283	0.6864
TP53:245:01:ENST00000269305	9	HNSC	1	TP53	245 vs 306	ENST00000269305	9	5	0.011	0	0.9991	0.5605	0.3307
TP53:176:01:ENST00000269305	5	LUSC	1	TP53	176 vs 179	ENST00000269305	5	9	0.012	7.7541	0.0166	0.7349	0.2901
TP53:245:01:ENST00000269305	8	OV	1	TP53	245 vs 266	ENST00000269305	8	5	0.0124	0.1876	0.0485	0.3516	0.0668
TP53:176:01:ENST00000269305	5	LUSC	1	TP53	176 vs 249	ENST00000269305	5	7	0.0126	9.2322	0.043	0.5728	0.1613
TP53:193:01:ENST00000269305	9	HNSC	1	TP53	193 vs 245	ENST00000269305	9	9	0.0129	5.2661	0.0179	0.6039	0.2776
TP53:244:01:ENST00000269305	5	OV	1	TP53	244 vs 248	ENST00000269305	5	21	0.0158	0.1547	0.0739	0.7936	0.4871
TP53:236:01:ENST00000269305	4	HNSC	1	TP53	236 vs 306	ENST00000269305	4	5	0.0159	0	0.9991	0.5258	0.1613
TP53:172:01:ENST00000269305	4	LUSC	1	TP53	172 vs 220	ENST00000269305	4	5	0.0159	0	0.9992	0.7229	0.4072
TP53:176:01:ENST00000269305	5	LUSC	1	TP53	176 vs 225	ENST00000269305	5	4	0.0159	NA	0.9991	0.5144	0.1383
TP53:176:01:ENST00000269305	5	LUSC	1	TP53	176 vs 307	ENST00000269305	5	5	0.0159	10.7706	0.0327	0.9048	0.5459
TP53:220:01:ENST00000269305	5	LUSC	1	TP53	220 vs 225	ENST00000269305	5	4	0.0159	NA	0.9992	0.8123	0.5063
TP53:266:01:ENST00000269305	5	OV	1	TP53	266 vs 281	ENST00000269305	5	4	0.0159	NA	0.9991	0.3295	0.0686
TP53:248:01:ENST00000269305	13	HNSC	1	TP53	248 vs 306	ENST00000269305	13	6	0.017	0.1387	0.0086	0.7876	0.5223
TP53:179:01:ENST00000269305	5	OV	1	TP53	179 vs 187	ENST00000269305	5	10	0.0173	0.1254	0.0582	0.9975	0.9439
TP53:125:01:ENST00000269305	7	LUSC	1	TP53	125 vs 126	ENST00000269305	7	5	0.0177	0	0.9995	0.1323	0.0353
TP53:125:01:ENST00000269305	7	LUSC	1	TP53	125 vs 220	ENST00000269305	7	5	0.0177	0.1339	0.0752	0.7538	0.4266
TP53:158:01:ENST00000269305	4	LGG	1	TP53	158 vs 175	ENST00000269305	4	7	0.0182	NA	0.9999	0.2121	0.0887
TP53:213:01:ENST00000269305	10	COAD	1	TP53	213 vs 282	ENST00000269305	10	11	0.0185	0	0.9993	0.2672	0.1082
TP53:176:01:ENST00000269305	5	LUSC	1	TP53	176 vs 245	ENST00000269305	5	14	0.0186	4.441	0.0206	0.6923	0.2478
TP53:157:01:ENST00000269305	4	HNSC	1	TP53	157 vs 306	ENST00000269305	4	6	0.019	0	0.9991	0.9969	0.9372
TP53:278:01:ENST00000269305	4	HNSC	1	TP53	278 vs 306	ENST00000269305	4	6	0.019	0	0.9991	0.9969	0.9372
TP53:157:01:ENST00000269305	14	LUSC	1	TP53	157 vs 176	ENST00000269305	14	5	0.0201	0.2351	0.0323	0.4154	0.0773
TP53:248:01:ENST00000269305	10	LUSC	1	TP53	248 vs 278	ENST00000269305	10	10	0.0209	8.4039	0.0536	0.7831	0.4931
APC:1114:01:ENST00000257430	5	READ	1	APC	1114 vs 213	ENST00000257430	5	6	0.0216	0	0.9994	0.8915	0.634
TP53:132:01:ENST00000269305	4	COAD	1	TP53	132 vs 213	ENST00000269305	4	10	0.022	NA	0.9994	0.4743	0.1793
TP53:126:01:ENST00000269305	6	LUSC	1	TP53	126 vs 249	ENST00000269305	6	7	0.0221	9.3756	0.0474	0.9069	0.6669
TP53:163:01:ENST00000269305	7	HNSC	1	TP53	163 vs 193	ENST00000269305	7	9	0.0233	0.2285	0.0364	0.781	0.4644
TP53:220:01:ENST00000269305	8	OV	1	TP53	220 vs 266	ENST00000269305	8	5	0.0233	0.1865	0.047	0.5096	0.1363
TP53:158:01:ENST00000269305	16	LUSC	1	TP53	158 vs 220	ENST00000269305	16	5	0.0237	0.1703	0.0145	0.9723	0.8074
TP53:151:01:ENST00000269305	5	HNSC	1	TP53	151 vs 220	ENST00000269305	5	5	0.0238	NA	0.9992	0.5918	0.285
TP53:220:01:ENST00000269305	5	LUSC	1	TP53	220 vs 307	ENST00000269305	5	5	0.0238	9.6242	0.0456	0.8669	0.6017
TP53:179:01:ENST00000269305	5	OV	1	TP53	179 vs 237	ENST00000269305	5	5	0.0238	0.0911	0.0358	0.6065	0.239
TP53:179:01:ENST00000269305	5	OV	1	TP53	179 vs 266	ENST00000269305	5	5	0.0238	0.1003	0.0387	1	1
TP53:193:01:ENST00000269305	5	OV	1	TP53	193 vs 266	ENST00000269305	5	5	0.0238	0.1003	0.0387	1	1
TP53:244:01:ENST00000269305	5	OV	1	TP53	244 vs 266	ENST00000269305	5	5	0.0238	0.1075	0.0437	0.8825	0.5041
TP53:278:01:ENST00000269305	10	LUSC	1	TP53	278 vs 280	ENST00000269305	10	4	0.024	0.0766	0.0289	0.5787	0.3653
TP53:173:01:ENST00000269305	4	BRCA	1	TP53	173 vs 196	ENST00000269305	4	8	0.0242	NA	0.9999	0.3185	0.1532
TP53:194:01:ENST00000269305	4	BRCA	1	TP53	194 vs 196	ENST00000269305	4	8	0.0242	NA	0.9999	0.3911	0.1905
TP53:179:01:ENST00000269305	8	HNSC	1	TP53	179 vs 306	ENST00000269305	8	6	0.026	0.1711	0.0384	0.9345	0.7174
TP53:126:01:ENST00000269305	6	LUSC	1	TP53	126 vs 242	ENST00000269305	6	5	0.026	NA	0.9992	0.9784	0.8345
TP53:125:01:ENST00000269305	4	LGG	1	TP53	125 vs 273	ENST00000269305	4	58	0.0265	3.5893	0.0572	0.543	0.2066
TP53:132:01:ENST00000269305	4	COAD	1	TP53	132 vs 248	ENST00000269305	4	19	0.0278	8.328	0.0211	0.7253	0.3806
TP53:193:01:ENST00000269305	9	HNSC	1	TP53	193 vs 236	ENST00000269305	9	4	0.028	NA	0.999	0.8145	0.5216
TP53:161:01:ENST00000269305	5	BLCA	1	TP53	161 vs 192	ENST00000269305	4	4	0.0286	NA	0.9993	0.8961	0.6462
TP53:194:01:ENST00000269305	4	BRCA	1	TP53	194 vs 213	ENST00000269305	4	6	0.0286	NA	0.9998	0.2389	0.0999
TP53:175:01:ENST00000269305	4	GBM	1	TP53	175 vs 238	ENST00000269305	4	4	0.0286	0	0.9992	0.4185	0.1134
TP53:196:01:ENST00000269305	8	HNSC	1	TP53	196 vs 306	ENST00000269305	8	6	0.0286	0.1487	0.0273	0.9152	0.6801
TP53:159:01:ENST00000269305	4	LUAD	1	TP53	159 vs 248	ENST00000269305	4	4	0.0286	NA	0.9992	0.3295	0.0686
TTN:13056:06:ENST00000591111	4	SKCM	6	TTN	13056 vs 20780	ENST00000591111	4	4	0.0286	NA	0.9993	0.9876	0.8761
TP53:175:01:ENST00000269305	11	ESCA	1	TP53	175 vs 213	ENST00000269305	11	4	0.0293	0.1165	0.0632	0.7795	0.4503
TP53:248:01:ENST00000269305	22	BLCA	1	TP53	248 vs 280	ENST00000269305	22	12	0.0298	3.5447	0.0506	0.9992	0.9683
TP53:175:01:ENST00000269305	19	BRCA	1	TP53	175 vs 196	ENST00000269305	19	8	0.0299	NA	0.9993	0.3554	0.1365
PIK3CA:118:01:ENST00000263967	9	UCEC	1	PIK3CA	118 vs 93	ENST00000263967	9	8	0.0299	NA	0.9993	0.7699	0.4703
TP53:266:01:ENST00000269305	5	OV	1	TP53	266 vs 273	ENST00000269305	5	19	0.0301	3.7517	0.0258	0.6645	0.2229
PIK3CA:38:01:ENST00000263967	10	UCEC	1	PIK3CA	38 vs 542	ENST00000263967	10	22	0.0301	9.1193	0.0484	0.0958	0.0208
TP53:220:01:ENST00000269305	5	LUSC	1	TP53	220 vs 249	ENST00000269305	5	7	0.0303	7.3823	0.0741	0.9209	0.6746
TP53:205:01:ENST00000269305	4	UCEC	1	TP53	205 vs 220	ENST00000269305	4	7	0.0303	NA	0.9993	0.5034	0.2144
TP53:157:01:ENST00000269305	4	HNSC	1	TP53	157 vs 193	ENST00000269305	4	9	0.0308	0.1453	0.0791	0.9915	0.8962
CIC:201:01:ENST00000575354	4	LGG	1	CIC	201 vs 215	ENST00000575354	4	12	0.0308	NA	0.9996	0.9956	0.926
ARID1A:1850:01:ENST00000324856	17	UCEC	1	ARID1A	1850 vs 1989	ENST00000324856	17	5	0.0308	NA	0.9993	0.1401	0.0365
TP53:172:01:ENST00000269305	4	LUSC	1	TP53	172 vs 176	ENST00000269305	4	5	0.0317	0	0.9991	0.3437	0.0728
TP53:176:01:ENST00000269305	5	LUSC	1	TP53	176 vs 266	ENST00000269305	5	5	0.0317	6.7972	0.085	0.3609	0.078
TP53:179:01:ENST00000269305	5	OV	1	TP53	179 vs 238	ENST00000269305	5	5	0.0317	0	0.9994	0.145	0.0258
TP53:234:01:ENST00000269305	5	OV	1	TP53	234 vs 266	ENST00000269305	5	5	0.0317	0	0.9991	0.1441	0.02
TP53:193:01:ENST00000269305	9	HNSC	1	TP53	193 vs 282	ENST00000269305	9	8	0.0323	3.8828	0.035	0.9875	0.8746
TP53:248:01:ENST00000269305	14	LGG	1	TP53	248 vs 273	ENST00000269305	14	58	0.0324	0.2898	0.1034	0.4176	0.1716
TP53:273:01:ENST00000269305	15	LUSC	1	TP53	273 vs 278	ENST00000269305	14	10	0.0333	6.6658	0.0797	0.7322	0.4324
TP53:158:01:ENST00000269305	16	LUSC	1	TP53	158 vs 280	ENST00000269305	16	4	0.0334	0.0631	0.0172	0.3036	0.2242
TP53:126:01:ENST00000269305	6	LUSC	1	TP53	126 vs 163	ENST00000269305	6	7	0.0338	7.4856	0.0756	0.9968	0.9459
TP53:179:01:ENST00000269305	8	HNSC	1	TP53	179 vs 193	ENST00000269305	8	8	0.0339	0.1994	0.0511	0.5255	0.2252
TP53:176:01:ENST00000269305	6	BRCA	1	TP53	176 vs 196	ENST00000269305	6	8	0.034	NA	0.9997	0.7178	0.4224
TP53:136:01:ENST00000269305	5	HNSC	1	TP53	136 vs 306	ENST00000269305	5	6	0.0346	0.1021	0.0406	0.6065	0.239
TP53:126:01:ENST00000269305	6	LUSC	1	TP53	126 vs 307	ENST00000269305	6	5	0.0346	9.1885	0.0514	0.5372	0.2719
TP53:234:01:ENST00000269305	9	LUSC	1	TP53	234 vs 249	ENST00000269305	9	7	0.0348	6.1695	0.0871	0.2342	0.0761
CIC:202:01:ENST00000575354	4	LGG	1	CIC	202 vs 215	ENST00000575354	4	12	0.0352	NA	0.9996	0.5867	0.2831
TP53:125:01:ENST00000269305	4	LGG	1	TP53	125 vs 220	ENST00000269305	4	9	0.0364	7.3135	0.0912	0.7768	0.4476
TP53:125:01:ENST00000269305	7	LUSC	1	TP53	125 vs 280	ENST00000269305	7	4	0.0364	0	0.9994	0.8818	0.6379
APC:213:01:ENST00000257430	6	READ	1	APC	213 vs 876	ENST00000257430	6	8	0.0366	NA	0.9995	0.943	0.7344
TP53:126:01:ENST00000269305	6	LUSC	1	TP53	126 vs 158	ENST00000269305	6	16	0.0373	5.8946	0.0153	0.5801	0.344
TP53:196:01:ENST00000269305	8	BRCA	1	TP53	196 vs 280	ENST00000269305	8	5	0.0389	0	0.9997	0.5524	0.2953
TP53:187:01:ENST00000269305	10	OV	1	TP53	187 vs 234	ENST00000269305	10	5	0.0393	NA	0.999	0.8696	0.6
TP53:193:01:ENST00000269305	5	OV	1	TP53	193 vs 237	ENST00000269305	5	5	0.0397	0.0911	0.0358	0.6065	0.239
TP53:234:01:ENST00000269305	9	LUSC	1	TP53	234 vs 307	ENST00000269305	9	5	0.04	4.0589	0.0794	0.9179	0.6755
TP53:176:01:ENST00000269305	6	HNSC	1	TP53	176 vs 306	ENST00000269305	6	6	0.0411	0.2005	0.0588	0.5488	0.2092
TP53:193:01:ENST00000269305	9	BRCA	1	TP53	193 vs 194	ENST00000269305	9	4	0.042	0	0.9998	0.9957	0.9266
TP53:194:01:ENST00000269305	4	BRCA	1	TP53	194 vs 342	ENST00000269305	4	9	0.042	NA	0.9998	0.875	0.6136
TP53:245:01:ENST00000269305	8	OV	1	TP53	245 vs 282	ENST00000269305	8	5	0.042	0	0.9993	0.9357	0.7123
TP53:175:01:ENST00000269305	15	OV	1	TP53	175 vs 237	ENST00000269305	15	5	0.0428	0.2496	0.0552	0.7163	0.3799
TP53:154:01:ENST00000269305	7	LUSC	1	TP53	154 vs 176	ENST00000269305	7	5	0.0429	0.2207	0.0719	0.5836	0.1758
TP53:273:01:ENST00000269305	15	LUSC	1	TP53	273 vs 280	ENST00000269305	14	4	0.0431	0.1045	0.0153	0.7991	0.5436
TP53:193:01:ENST00000269305	5	OV	1	TP53	193 vs 248	ENST00000269305	5	21	0.0431	0.3259	0.0932	0.6286	0.3173
TP53:196:01:ENST00000269305	8	BRCA	1	TP53	196 vs 248	ENST00000269305	8	8	0.0437	0	0.9994	0.6115	0.3266
TP53:244:01:ENST00000269305	6	LUSC	1	TP53	244 vs 278	ENST00000269305	6	10	0.0437	8.8227	0.0636	0.6997	0.4142
PIK3CA:38:01:ENST00000263967	10	UCEC	1	PIK3CA	38 vs 545	ENST00000263967	10	26	0.0438	5.5296	0.049	0.0629	0.0099
FBXW7:505:01:ENST00000281708	12	UCEC	1	FBXW7	505 vs 545	ENST00000281708	12	4	0.044	0	0.9993	0.12	0.0851
TP53:161:01:ENST00000269305	5	BLCA	1	TP53	161 vs 280	ENST00000269305	4	13	0.0445	8.3708	0.0207	0.9075	0.6755
TP53:193:01:ENST00000269305	9	HNSC	1	TP53	193 vs 196	ENST00000269305	9	8	0.0445	3.9851	0.0529	0.974	0.8171
TP53:173:01:ENST00000269305	4	BRCA	1	TP53	173 vs 193	ENST00000269305	4	9	0.0448	NA	0.9996	0.9882	0.8786
TP53:173:01:ENST00000269305	4	BRCA	1	TP53	173 vs 342	ENST00000269305	4	9	0.0448	NA	0.9996	0.9363	0.722
TP53:273:01:ENST00000269305	12	HNSC	1	TP53	273 vs 306	ENST00000269305	12	6	0.0448	0.2111	0.0234	0.7872	0.5124
TP53:179:01:ENST00000269305	9	LUSC	1	TP53	179 vs 280	ENST00000269305	9	4	0.0448	0.0768	0.0305	0.2462	0.1855
PIK3CA:111:01:ENST00000263967	4	UCEC	1	PIK3CA	111 vs 118	ENST00000263967	4	9	0.0448	0	0.9993	0.7234	0.4154
TP53:280:01:ENST00000269305	5	BRCA	1	TP53	280 vs 342	ENST00000269305	5	9	0.045	NA	0.9996	0.9978	0.9473
TP53:175:01:ENST00000269305	11	ESCA	1	TP53	175 vs 176	ENST00000269305	11	4	0.0454	0.1687	0.1308	0.3806	0.1247
TP53:175:01:ENST00000269305	15	OV	1	TP53	175 vs 187	ENST00000269305	15	10	0.0459	0.2698	0.0373	0.9981	0.9505
TP53:176:01:ENST00000269305	6	BRCA	1	TP53	176 vs 342	ENST00000269305	6	9	0.046	NA	0.9996	0.5465	0.2713
TP53:176:01:ENST00000269305	5	LUSC	1	TP53	176 vs 273	ENST00000269305	5	14	0.0466	3.0023	0.0736	0.4453	0.0915
TP53:132:01:ENST00000269305	4	COAD	1	TP53	132 vs 175	ENST00000269305	4	22	0.047	6.183	0.0258	0.9598	0.7662
TP53:187:01:ENST00000269305	10	OV	1	TP53	187 vs 244	ENST00000269305	10	5	0.0473	6.1327	0.0968	0.7621	0.4623
TP53:161:01:ENST00000269305	5	BLCA	1	TP53	161 vs 241	ENST00000269305	4	5	0.0476	NA	0.9991	0.5353	0.2028
NFE2L2:29:01:ENST00000397062	4	HNSC	1	NFE2L2	29 vs 79	ENST00000397062	4	5	0.0476	0.3838	0.26	1	1
TP53:193:01:ENST00000269305	9	HNSC	1	TP53	193 vs 294	ENST00000269305	9	4	0.0476	6.235	0.0914	0.5347	0.2544
TP53:213:01:ENST00000269305	11	HNSC	1	TP53	213 vs 220	ENST00000269305	11	5	0.0476	NA	0.9991	0.9221	0.6897
TP53:220:01:ENST00000269305	5	HNSC	1	TP53	220 vs 298	ENST00000269305	5	5	0.0476	0	0.9992	0.6369	0.3199
TP53:126:01:ENST00000269305	6	LUSC	1	TP53	126 vs 266	ENST00000269305	6	5	0.0476	6.518	0.0992	0.9745	0.8218
TP53:244:01:ENST00000269305	6	LUSC	1	TP53	244 vs 307	ENST00000269305	6	5	0.0476	NA	0.9993	0.2888	0.117
TP53:179:01:ENST00000269305	5	OV	1	TP53	179 vs 306	ENST00000269305	5	4	0.0476	0.1341	0.0734	0.7472	0.3121
TP53:234:01:ENST00000269305	5	OV	1	TP53	234 vs 237	ENST00000269305	5	5	0.0476	0	0.9992	0.5031	0.2223
TP53:234:01:ENST00000269305	5	OV	1	TP53	234 vs 282	ENST00000269305	5	5	0.0476	0	0.9993	0.8108	0.5126
TP53:234:01:ENST00000269305	5	OV	1	TP53	234 vs 306	ENST00000269305	5	4	0.0476	0	0.9992	0.1784	0.0258
TP53:234:01:ENST00000269305	5	OV	1	TP53	234 vs 342	ENST00000269305	5	4	0.0476	0	0.9992	0.1784	0.0258
TP53:237:01:ENST00000269305	5	OV	1	TP53	237 vs 244	ENST00000269305	5	5	0.0476	7.2335	0.0794	0.8961	0.6462
TP53:266:01:ENST00000269305	5	OV	1	TP53	266 vs 278	ENST00000269305	5	6	0.0476	4.4878	0.075	0.638	0.2232
APC:1114:01:ENST00000257430	5	READ	1	APC	1114 vs 1450	ENST00000257430	5	4	0.0476	0	0.9998	0.3461	0.148
TP53:126:01:ENST00000269305	6	LUSC	1	TP53	126 vs 154	ENST00000269305	6	7	0.0478	5.3194	0.0589	0.8122	0.5337
TP53:163:01:ENST00000269305	7	LUSC	1	TP53	163 vs 176	ENST00000269305	7	5	0.048	0.1734	0.1103	0.1997	0.0258
TP53:163:01:ENST00000269305	7	HNSC	1	TP53	163 vs 32	ENST00000269305	7	4	0.0485	0	0.999	0.8818	0.6379
TP53:238:01:ENST00000269305	4	GBM	1	TP53	238 vs 248	ENST00000269305	4	12	0.0495	5.1163	0.0351	0.8338	0.4309
TP53:125:01:ENST00000269305	7	LUSC	1	TP53	125 vs 175	ENST00000269305	7	8	0.0516	0.1509	0.0943	0.8973	0.6576
TP53:176:01:ENST00000269305	6	HNSC	1	TP53	176 vs 193	ENST00000269305	6	9	0.0519	0.2259	0.0676	0.7907	0.504
TP53:306:01:ENST00000269305	6	HNSC	1	TP53	306 vs 337	ENST00000269305	6	5	0.0519	6.2903	0.0953	0.9478	0.7402
TP53:179:01:ENST00000269305	8	BRCA	1	TP53	179 vs 194	ENST00000269305	8	4	0.0525	0	0.9996	0.79	0.4868
TP53:175:01:ENST00000269305	7	LGG	1	TP53	175 vs 213	ENST00000269305	7	5	0.053	0	0.9996	0.7894	0.5005
TP53:175:01:ENST00000269305	15	OV	1	TP53	175 vs 248	ENST00000269305	15	21	0.0534	0.4035	0.069	0.9983	0.9537
TP53:245:01:ENST00000269305	14	LUSC	1	TP53	245 vs 280	ENST00000269305	14	4	0.0536	0.1233	0.0228	0.2956	0.2219
TP53:136:01:ENST00000269305	5	HNSC	1	TP53	136 vs 193	ENST00000269305	5	9	0.0539	0.272	0.0691	0.8508	0.5661
TP53:248:01:ENST00000269305	5	LIHC	1	TP53	248 vs 249	ENST00000269305	5	10	0.0539	0	0.9991	0.4962	0.2399
TP53:126:01:ENST00000269305	6	LUSC	1	TP53	126 vs 245	ENST00000269305	6	14	0.0541	4.4445	0.0286	0.4538	0.2602
TP53:196:01:ENST00000269305	8	BRCA	1	TP53	196 vs 225	ENST00000269305	8	5	0.0544	0	0.9996	0.9873	0.8737
TP53:196:01:ENST00000269305	8	BRCA	1	TP53	196 vs 331	ENST00000269305	8	5	0.0544	0	0.9996	0.9949	0.9197
TP53:157:01:ENST00000269305	14	LUSC	1	TP53	157 vs 280	ENST00000269305	14	4	0.0549	0.1563	0.0258	0.7973	0.542
TP53:126:01:ENST00000269305	6	LUSC	1	TP53	126 vs 179	ENST00000269305	6	9	0.0555	4.7811	0.0449	0.5939	0.3412
TP53:151:01:ENST00000269305	5	HNSC	1	TP53	151 vs 163	ENST00000269305	5	7	0.0556	4.6509	0.0801	0.9214	0.6784
TP53:220:01:ENST00000269305	5	LUSC	1	TP53	220 vs 242	ENST00000269305	5	5	0.0556	6.0067	0.1144	0.758	0.4434
PIK3R1:575:01:ENST00000521381	5	UCEC	1	PIK3R1	575 vs 642	ENST00000521381	5	5	0.0556	NA	0.9995	0.6924	0.3942
TP53:234:01:ENST00000269305	5	OV	1	TP53	234 vs 248	ENST00000269305	5	21	0.0561	0	0.9982	0.7538	0.4683
TP53:161:01:ENST00000269305	5	BLCA	1	TP53	161 vs 245	ENST00000269305	4	4	0.0571	NA	0.9993	0.6065	0.239
TP53:283:01:ENST00000269305	4	HNSC	1	TP53	283 vs 306	ENST00000269305	4	6	0.0571	0.1606	0.1024	0.6703	0.2783
TP53:294:01:ENST00000269305	4	HNSC	1	TP53	294 vs 306	ENST00000269305	4	6	0.0571	0.1632	0.1007	0.9854	0.8628
TP53:159:01:ENST00000269305	4	LUAD	1	TP53	159 vs 245	ENST00000269305	4	6	0.0571	5.105	0.1477	0.2852	0.0485
TP53:225:01:ENST00000269305	4	LUSC	1	TP53	225 vs 244	ENST00000269305	4	6	0.0571	0	0.9993	0.9744	0.8202
TP53:110:01:ENST00000269305	5	BRCA	1	TP53	110 vs 342	ENST00000269305	5	9	0.0579	NA	0.9996	0.5602	0.2761
TP53:132:01:ENST00000269305	5	BRCA	1	TP53	132 vs 342	ENST00000269305	5	9	0.0579	NA	0.9996	0.1156	0.0347
TP53:248:01:ENST00000269305	21	OV	1	TP53	248 vs 273	ENST00000269305	21	18	0.0603	2.2849	0.0575	0.343	0.149
TP53:125:01:ENST00000269305	7	LUSC	1	TP53	125 vs 244	ENST00000269305	7	6	0.0606	0	0.9993	0.9477	0.7427
PIK3CA:118:01:ENST00000263967	9	UCEC	1	PIK3CA	118 vs 542	ENST00000263967	9	23	0.0614	7.0754	0.0906	0.7901	0.4825
PIK3CA:118:01:ENST00000263967	5	BRCA	1	PIK3CA	118 vs 726	ENST00000263967	5	9	0.0619	NA	0.9996	0.8811	0.6119
CTNNB1:37:01:ENST00000349496	19	UCEC	1	CTNNB1	37 vs 41	ENST00000349496	19	11	0.0619	NA	0.9991	0.8272	0.5409
APC:1450:01:ENST00000257430	5	READ	1	APC	1450 vs 876	ENST00000257430	5	8	0.0622	NA	0.9997	0.4267	0.2137
TP53:161:01:ENST00000269305	5	BLCA	1	TP53	161 vs 336	ENST00000269305	4	5	0.0635	8.181	0.0712	0.822	0.5459
TP53:194:01:ENST00000269305	4	BRCA	1	TP53	194 vs 331	ENST00000269305	4	5	0.0635	NA	0.9998	0.3461	0.148
TP53:159:01:ENST00000269305	4	LUAD	1	TP53	159 vs 331	ENST00000269305	4	5	0.0635	5.3876	0.1342	0.4474	0.1095
TP53:242:01:ENST00000269305	5	LUSC	1	TP53	242 vs 280	ENST00000269305	5	4	0.0635	0	0.9993	0.974	0.8219
TP53:266:01:ENST00000269305	5	LUSC	1	TP53	266 vs 280	ENST00000269305	5	4	0.0635	0	0.9993	0.9386	0.731
TP53:179:01:ENST00000269305	5	OV	1	TP53	179 vs 282	ENST00000269305	5	5	0.0635	0.1105	0.062	0.2708	0.0673
TP53:179:01:ENST00000269305	5	OV	1	TP53	179 vs 307	ENST00000269305	5	4	0.0635	0.1527	0.0937	0.7472	0.3121
TP53:192:01:ENST00000269305	5	OV	1	TP53	192 vs 266	ENST00000269305	5	5	0.0635	0.1918	0.1327	0.3295	0.0686
TP53:193:01:ENST00000269305	9	HNSC	1	TP53	193 vs 248	ENST00000269305	9	13	0.0642	2.8935	0.0607	0.6845	0.3507
TP53:175:01:ENST00000269305	15	OV	1	TP53	175 vs 282	ENST00000269305	15	5	0.0646	0.0825	0.0346	0.9996	0.9782
TP53:187:01:ENST00000269305	10	OV	1	TP53	187 vs 193	ENST00000269305	10	5	0.0646	3.7039	0.0796	0.946	0.7378
TP53:193:01:ENST00000269305	9	BRCA	1	TP53	193 vs 245	ENST00000269305	9	5	0.0649	0	0.9997	0.2809	0.1105
TP53:175:01:ENST00000269305	12	HNSC	1	TP53	175 vs 220	ENST00000269305	12	5	0.065	NA	0.999	0.8965	0.644
TP53:195:01:ENST00000269305	12	OV	1	TP53	195 vs 234	ENST00000269305	12	5	0.065	NA	0.9991	0.7603	0.4718
TP53:195:01:ENST00000269305	12	OV	1	TP53	195 vs 266	ENST00000269305	12	5	0.065	0.3278	0.0983	0.3365	0.054
PIK3CA:1047:01:ENST00000263967	41	UCEC	1	PIK3CA	1047 vs 38	ENST00000263967	41	10	0.0651	0.2743	0.0696	0.3886	0.1475
PIK3CA:542:01:ENST00000263967	16	CESC	1	PIK3CA	542 vs 726	ENST00000263967	16	5	0.0653	0.1955	0.0747	0.9007	0.6361
TP53:125:01:ENST00000269305	7	LUSC	1	TP53	125 vs 187	ENST00000269305	7	6	0.0653	0	0.9993	0.9891	0.8825
APC:1114:01:ENST00000257430	7	COAD	1	APC	1114 vs 564	ENST00000257430	7	4	0.0667	0	0.9996	0.8785	0.6199
TP53:238:01:ENST00000269305	4	GBM	1	TP53	238 vs 273	ENST00000269305	4	6	0.0667	7.2063	0.0842	0.7165	0.3121
TP53:125:01:ENST00000269305	4	LGG	1	TP53	125 vs 245	ENST00000269305	4	6	0.0667	7.7861	0.0816	0.9993	0.9693
TP53:280:01:ENST00000269305	4	LUSC	1	TP53	280 vs 331	ENST00000269305	4	7	0.0667	7.7494	0.0788	0.978	0.8117
TP53:237:01:ENST00000269305	5	OV	1	TP53	237 vs 245	ENST00000269305	5	8	0.0668	4.1439	0.1087	0.6536	0.334
FBXW7:465:01:ENST00000281708	13	UCEC	1	FBXW7	465 vs 545	ENST00000281708	13	4	0.0672	0	0.9993	0.5369	0.3105
KRAS:12:01:ENST00000256078	130	PAAD	1	KRAS	12 vs 61	ENST00000256078	128	7	0.0678	0.4054	0.0363	0.9469	0.7288
PTEN:127:01:ENST00000371953	6	UCEC	1	PTEN	127 vs 268	ENST00000371953	5	8	0.0684	NA	0.9996	0.6203	0.3254
TP53:187:01:ENST00000269305	6	LUSC	1	TP53	187 vs 278	ENST00000269305	6	10	0.0687	7.0798	0.0949	0.8879	0.6331
TP53:273:01:ENST00000269305	15	LUSC	1	TP53	273 vs 307	ENST00000269305	14	5	0.0691	5.1691	0.1313	0.0979	0.0203
TP53:132:01:ENST00000269305	6	OV	1	TP53	132 vs 179	ENST00000269305	6	5	0.0693	6.2039	0.107	0.7801	0.4621
TP53:125:01:ENST00000269305	7	LUSC	1	TP53	125 vs 248	ENST00000269305	7	10	0.0697	0.1818	0.1207	0.9296	0.7034
TP53:193:01:ENST00000269305	9	HNSC	1	TP53	193 vs 278	ENST00000269305	9	4	0.0699	5.3677	0.1196	0.9858	0.8659
TP53:225:01:ENST00000269305	4	LUSC	1	TP53	225 vs 248	ENST00000269305	4	10	0.0699	0	0.9991	0.9128	0.6672
TP53:248:01:ENST00000269305	10	PAAD	1	TP53	248 vs 273	ENST00000269305	10	5	0.0699	5.7786	0.1028	0.826	0.5368
PIK3CA:111:01:ENST00000263967	4	UCEC	1	PIK3CA	111 vs 38	ENST00000263967	4	10	0.0699	0	0.9992	0.9707	0.8082
TP53:187:01:ENST00000269305	5	BRCA	1	TP53	187 vs 193	ENST00000269305	5	9	0.0709	NA	0.9997	0.0257	0.0039
TP53:187:01:ENST00000269305	5	BRCA	1	TP53	187 vs 342	ENST00000269305	5	9	0.0709	NA	0.9997	0.4213	0.1851
TP53:193:01:ENST00000269305	9	BRCA	1	TP53	193 vs 242	ENST00000269305	9	5	0.0709	0	0.9996	0.2999	0.1108
TP53:242:01:ENST00000269305	5	BRCA	1	TP53	242 vs 342	ENST00000269305	5	9	0.0709	NA	0.9996	0.7033	0.3954
TP53:245:01:ENST00000269305	5	BRCA	1	TP53	245 vs 342	ENST00000269305	5	9	0.0709	NA	0.9996	0.7477	0.4421
TP53:163:01:ENST00000269305	9	OV	1	TP53	163 vs 179	ENST00000269305	9	5	0.0709	5.3419	0.1341	0.2323	0.0985
TP53:176:01:ENST00000269305	6	BRCA	1	TP53	176 vs 213	ENST00000269305	6	6	0.0714	NA	0.9996	0.9684	0.8001
TP53:244:01:ENST00000269305	5	OV	1	TP53	244 vs 282	ENST00000269305	5	5	0.0714	0.1428	0.0971	0.2708	0.0673
TP53:245:01:ENST00000269305	4	BLCA	1	TP53	245 vs 248	ENST00000269305	4	22	0.072	0.2277	0.1589	0.8168	0.5175
TP53:196:01:ENST00000269305	8	BRCA	1	TP53	196 vs 273	ENST00000269305	8	20	0.0724	0	0.9992	0.8903	0.6258
TP53:193:01:ENST00000269305	7	LUSC	1	TP53	193 vs 280	ENST00000269305	7	4	0.0727	0.1231	0.0721	0.9624	0.7885
PTEN:268:01:ENST00000371953	8	UCEC	1	PTEN	268 vs 342	ENST00000371953	8	4	0.0727	0	0.9997	0.6203	0.3195
TP53:176:01:ENST00000269305	5	LUSC	1	TP53	176 vs 193	ENST00000269305	5	7	0.0732	5.9886	0.1103	0.1663	0.0179
TP53:126:01:ENST00000269305	6	LUSC	1	TP53	126 vs 193	ENST00000269305	6	7	0.0734	7.2808	0.0913	0.8751	0.5973
TP53:176:01:ENST00000269305	5	LUSC	1	TP53	176 vs 282	ENST00000269305	5	6	0.0736	3.8692	0.109	0.5836	0.1758
TP53:132:01:ENST00000269305	6	OV	1	TP53	132 vs 234	ENST00000269305	6	5	0.0736	NA	0.9992	0.7278	0.4207
TP53:175:01:ENST00000269305	11	ESCA	1	TP53	175 vs 248	ENST00000269305	11	14	0.0745	0.2867	0.1153	0.6944	0.3888
PTEN:170:01:ENST00000371953	4	UCEC	1	PTEN	170 vs 233	ENST00000371953	4	24	0.0748	6.7231	0.0602	0.9984	0.9545
TP53:175:01:ENST00000269305	8	LUSC	1	TP53	175 vs 278	ENST00000269305	8	10	0.0755	4.5916	0.0861	0.9996	0.9999
APC:1378:01:ENST00000257430	6	COAD	1	APC	1378 vs 499	ENST00000257430	6	6	0.0758	NA	0.9994	0.9982	0.9516
TP53:176:01:ENST00000269305	5	LUSC	1	TP53	176 vs 331	ENST00000269305	5	7	0.0758	5.8694	0.115	0.1561	0.0166
TP53:110:01:ENST00000269305	5	BRCA	1	TP53	110 vs 196	ENST00000269305	5	8	0.0761	NA	0.9996	0.9843	0.8594
TP53:132:01:ENST00000269305	5	BRCA	1	TP53	132 vs 196	ENST00000269305	5	8	0.0761	NA	0.9996	0.9973	0.9418
TP53:173:01:ENST00000269305	4	BRCA	1	TP53	173 vs 213	ENST00000269305	4	6	0.0762	NA	0.9996	0.6292	0.358
CTNNB1:41:01:ENST00000349496	11	UCEC	1	CTNNB1	41 vs 45	ENST00000349496	11	4	0.0762	0	0.9996	0.9939	0.9112
TP53:126:01:ENST00000269305	7	BRCA	1	TP53	126 vs 196	ENST00000269305	7	8	0.0765	NA	0.9994	0.8403	0.5485
TP53:213:01:ENST00000269305	6	BRCA	1	TP53	213 vs 225	ENST00000269305	6	5	0.0779	0	0.9996	1	0.9986
TP53:213:01:ENST00000269305	6	BRCA	1	TP53	213 vs 280	ENST00000269305	6	5	0.0779	0	0.9996	0.8416	0.5634
TP53:172:01:ENST00000269305	4	LUSC	1	TP53	172 vs 248	ENST00000269305	4	10	0.0779	0	0.9991	0.9945	0.9165
TP53:158:01:ENST00000269305	16	LUSC	1	TP53	158 vs 244	ENST00000269305	16	6	0.0782	0.0667	0.0234	0.4714	0.2521
TP53:245:01:ENST00000269305	9	HNSC	1	TP53	245 vs 32	ENST00000269305	9	4	0.0783	0.214	0.0656	0.3089	0.2107
ARID1A:1519:01:ENST00000324856	4	UCEC	1	ARID1A	1519 vs 1850	ENST00000324856	4	17	0.0785	0	0.9994	0.3859	0.1459
ARID1A:1850:01:ENST00000324856	17	UCEC	1	ARID1A	1850 vs 693	ENST00000324856	17	4	0.0785	NA	0.9994	0.4253	0.1685
TP53:175:01:ENST00000269305	15	OV	1	TP53	175 vs 306	ENST00000269305	15	4	0.0789	0.3643	0.1339	0.3905	0.0683
TP53:237:01:ENST00000269305	5	OV	1	TP53	237 vs 273	ENST00000269305	5	19	0.0791	3.9477	0.0381	0.9991	0.9667
APC:1450:01:ENST00000257430	19	COAD	1	APC	1450 vs 1489	ENST00000257430	19	4	0.0793	NA	0.9988	0.6053	0.294
EGFR:222:01:ENST00000275493	5	GBM	1	EGFR	222 vs 252	ENST00000275493	5	4	0.0794	5.9687	0.1118	1	1
TP53:151:01:ENST00000269305	5	HNSC	1	TP53	151 vs 236	ENST00000269305	5	4	0.0794	NA	0.9992	0.5075	0.2379
TP53:220:01:ENST00000269305	5	HNSC	1	TP53	220 vs 337	ENST00000269305	5	5	0.0794	0	0.9994	0.9331	0.7112
TP53:236:01:ENST00000269305	4	HNSC	1	TP53	236 vs 298	ENST00000269305	4	5	0.0794	0	0.9992	0.7229	0.4072
TP53:157:01:ENST00000269305	5	LUAD	1	TP53	157 vs 159	ENST00000269305	5	4	0.0794	0.209	0.077	0.8825	0.5041
TP53:280:01:ENST00000269305	4	LUSC	1	TP53	280 vs 307	ENST00000269305	4	5	0.0794	NA	0.9993	0.0821	0.0584
TP53:179:01:ENST00000269305	5	OV	1	TP53	179 vs 261	ENST00000269305	5	4	0.0794	0.1559	0.1138	0.5353	0.2028
TP53:234:01:ENST00000269305	5	OV	1	TP53	234 vs 238	ENST00000269305	5	5	0.0794	0	0.9994	0.9147	0.6749
TP53:234:01:ENST00000269305	5	OV	1	TP53	234 vs 307	ENST00000269305	5	4	0.0794	0	0.9992	0.1203	0.0162
TP53:244:01:ENST00000269305	5	OV	1	TP53	244 vs 306	ENST00000269305	5	4	0.0794	0.1862	0.1337	0.5144	0.1383
PIK3CA:38:01:ENST00000263967	10	UCEC	1	PIK3CA	38 vs 93	ENST00000263967	10	8	0.0797	NA	0.9992	0.4645	0.2165
TP53:193:01:ENST00000269305	9	HNSC	1	TP53	193 vs 283	ENST00000269305	9	4	0.0811	5.2167	0.1256	0.9716	0.8108
TP53:158:01:ENST00000269305	16	LUSC	1	TP53	158 vs 234	ENST00000269305	16	9	0.0813	0.4181	0.1111	0.313	0.0925
TP53:179:01:ENST00000269305	9	LUSC	1	TP53	179 vs 220	ENST00000269305	9	5	0.0819	0.2636	0.0878	0.909	0.6493
TP53:151:01:ENST00000269305	5	HNSC	1	TP53	151 vs 306	ENST00000269305	5	6	0.0823	0.2412	0.0938	0.8961	0.6462
TP53:176:01:ENST00000269305	5	LUSC	1	TP53	176 vs 187	ENST00000269305	5	6	0.0823	3.6994	0.1225	0.4497	0.1095
TP53:132:01:ENST00000269305	6	OV	1	TP53	132 vs 244	ENST00000269305	6	5	0.0823	5.3895	0.1376	0.9999	0.9918
TP53:175:01:ENST00000269305	8	LUSC	1	TP53	175 vs 249	ENST00000269305	8	7	0.0827	5.55	0.1274	0.9029	0.6409
TP53:193:01:ENST00000269305	9	HNSC	1	TP53	193 vs 273	ENST00000269305	9	12	0.0828	2.721	0.0689	0.9999	0.9868
PIK3CA:1047:01:ENST00000263967	41	UCEC	1	PIK3CA	1047 vs 118	ENST00000263967	41	9	0.083	0.2281	0.0705	0.9594	0.7705
APC:1114:01:ENST00000257430	7	COAD	1	APC	1114 vs 805	ENST00000257430	7	5	0.0833	0	0.9996	0.3862	0.1623
PTEN:268:01:ENST00000371953	8	UCEC	1	PTEN	268 vs 92	ENST00000371953	8	7	0.0848	0	0.9997	0.7088	0.4097
SPOP:102:01:ENST00000347630	8	PRAD	1	SPOP	102 vs 131	ENST00000347630	8	14	0.0851	NA	0.9996	0.9964	0.932
TP53:173:01:ENST00000269305	4	BRCA	1	TP53	173 vs 195	ENST00000269305	4	4	0.0857	NA	0.9996	0.7476	0.4481
TP53:173:01:ENST00000269305	4	BRCA	1	TP53	173 vs 278	ENST00000269305	4	4	0.0857	NA	0.9996	0.5962	0.3178
APC:1489:01:ENST00000257430	4	COAD	1	APC	1489 vs 564	ENST00000257430	4	4	0.0857	0	0.9996	0.4588	0.2265
CDKN2A:51:01:ENST00000304494	4	HNSC	1	CDKN2A	51 vs 88	ENST00000304494	4	4	0.0857	NA	0.9995	0.3136	0.0792
TP53:261:01:ENST00000269305	4	OV	1	TP53	261 vs 281	ENST00000269305	4	4	0.0857	NA	0.9993	0.7407	0.4251
DDX17:121:01:ENST00000403230	4	UCEC	1	DDX17	121 vs 163	ENST00000403230	4	4	0.0857	NA	0.9996	0.5962	0.3178
PTEN:170:01:ENST00000371953	4	UCEC	1	PTEN	170 vs 7	ENST00000371953	4	4	0.0857	NA	0.9995	0.8032	0.5052
PTEN:57:01:ENST00000371953	4	UCEC	1	PTEN	57 vs 7	ENST00000371953	4	4	0.0857	NA	0.9994	0.7359	0.4336
TP53:163:01:ENST00000269305	7	HNSC	1	TP53	163 vs 298	ENST00000269305	7	5	0.0859	0.2217	0.0862	0.9828	0.85
TP53:126:01:ENST00000269305	6	LUSC	1	TP53	126 vs 157	ENST00000269305	6	14	0.0859	3.4996	0.0692	0.9468	0.7475
TP53:187:01:ENST00000269305	6	LUSC	1	TP53	187 vs 242	ENST00000269305	6	5	0.0866	NA	0.9993	0.963	0.7827
TP53:242:01:ENST00000269305	5	LUSC	1	TP53	242 vs 244	ENST00000269305	5	6	0.0866	0	0.9993	0.9944	0.9153
TP53:175:01:ENST00000269305	12	HNSC	1	TP53	175 vs 306	ENST00000269305	12	6	0.0871	0.2664	0.0523	0.7883	0.5134
TP53:105:01:ENST00000269305	5	LUSC	1	TP53	105 vs 176	ENST00000269305	5	5	0.0873	0.2242	0.0823	1	1
TP53:175:01:ENST00000269305	7	LGG	1	TP53	175 vs 179	ENST00000269305	7	9	0.0881	0	0.9994	0.6061	0.3188
NFE2L2:29:01:ENST00000397062	14	LUSC	1	NFE2L2	29 vs 34	ENST00000397062	14	16	0.0884	2.9315	0.0818	0.9444	0.7368
TP53:154:01:ENST00000269305	7	LUSC	1	TP53	154 vs 220	ENST00000269305	7	5	0.0884	0.2574	0.118	0.9913	0.8936
PIK3R1:575:01:ENST00000521381	5	UCEC	1	PIK3R1	575 vs 576	ENST00000521381	5	7	0.0884	NA	0.9994	0.9999	0.9883
TP53:172:01:ENST00000269305	4	LUSC	1	TP53	172 vs 175	ENST00000269305	4	8	0.0889	0	0.9992	0.7557	0.4772
TP53:248:01:ENST00000269305	10	LUSC	1	TP53	248 vs 307	ENST00000269305	10	5	0.0899	5.3183	0.1324	0.1229	0.0366
TP53:125:01:ENST00000269305	4	LGG	1	TP53	125 vs 175	ENST00000269305	4	7	0.0909	NA	0.9995	0.5816	0.2615
TP53:175:01:ENST00000269305	7	LGG	1	TP53	175 vs 275	ENST00000269305	7	4	0.0909	0	0.9996	0.9902	0.8879
TP53:126:01:ENST00000269305	6	LUSC	1	TP53	126 vs 282	ENST00000269305	6	6	0.0909	4.3384	0.1018	0.9399	0.7289
TP53:249:01:ENST00000269305	7	LUSC	1	TP53	249 vs 280	ENST00000269305	7	4	0.0909	0.128	0.0769	0.4017	0.2547
TP53:241:01:ENST00000269305	6	OV	1	TP53	241 vs 266	ENST00000269305	6	5	0.0909	0.2414	0.0942	0.7788	0.3678
TP53:220:01:ENST00000269305	8	OV	1	TP53	220 vs 237	ENST00000269305	8	5	0.0917	0.2335	0.0988	0.9055	0.6468
TP53:175:01:ENST00000269305	8	UCEC	1	TP53	175 vs 220	ENST00000269305	8	7	0.092	NA	0.9993	0.9555	0.7624
APC:1114:01:ENST00000257430	7	COAD	1	APC	1114 vs 1414	ENST00000257430	7	6	0.0921	0	0.9997	0.1717	0.0614
TP53:213:01:ENST00000269305	11	HNSC	1	TP53	213 vs 306	ENST00000269305	11	6	0.0923	0.2933	0.0743	0.9958	0.9275
PTEN:130:01:ENST00000371953	66	UCEC	1	PTEN	130 vs 57	ENST00000371953	63	4	0.0926	0.2217	0.0674	0.9469	0.7327
TP53:179:01:ENST00000269305	5	OV	1	TP53	179 vs 195	ENST00000269305	5	12	0.0928	0.2154	0.1659	0.7839	0.4838
TP53:175:01:ENST00000269305	11	STAD	1	TP53	175 vs 213	ENST00000269305	11	6	0.0932	0.1906	0.1551	0.6135	0.2968
CCND1:286:01:ENST00000227507	7	UCEC	1	CCND1	286 vs 287	ENST00000227507	7	5	0.0934	0	0.9996	0.6328	0.351
TP53:249:01:ENST00000269305	7	LUSC	1	TP53	249 vs 273	ENST00000269305	7	14	0.0937	0.213	0.1549	0.6511	0.3482
TP53:245:01:ENST00000269305	6	LGG	1	TP53	245 vs 273	ENST00000269305	6	59	0.0941	0.3191	0.272	0.6018	0.2882
PIK3CA:38:01:ENST00000263967	10	UCEC	1	PIK3CA	38 vs 88	ENST00000263967	10	17	0.0944	5.232	0.1397	0.1747	0.0535
TP53:158:01:ENST00000269305	16	LUSC	1	TP53	158 vs 273	ENST00000269305	16	14	0.0949	0.303	0.0691	0.2213	0.0934
TP53:234:01:ENST00000269305	9	LUSC	1	TP53	234 vs 271	ENST00000269305	9	4	0.0951	4.8314	0.14	0.7208	0.4183
APC:232:01:ENST00000257430	5	COAD	1	APC	232 vs 564	ENST00000257430	5	4	0.0952	0	0.9996	0.9819	0.8483
TP53:151:01:ENST00000269305	5	HNSC	1	TP53	151 vs 157	ENST00000269305	5	4	0.0952	6.1347	0.1125	0.9837	0.8569
TP53:220:01:ENST00000269305	5	HNSC	1	TP53	220 vs 32	ENST00000269305	5	4	0.0952	0	0.9993	0.8598	0.6049
TP53:176:01:ENST00000269305	5	LUSC	1	TP53	176 vs 271	ENST00000269305	5	4	0.0952	5.3661	0.1301	0.8465	0.4481
TP53:244:01:ENST00000269305	6	LUSC	1	TP53	244 vs 280	ENST00000269305	6	4	0.0952	0.1224	0.0745	0.4656	0.2857
TP53:237:01:ENST00000269305	5	OV	1	TP53	237 vs 281	ENST00000269305	5	4	0.0952	NA	0.9992	0.6198	0.3171
TP53:244:01:ENST00000269305	5	OV	1	TP53	244 vs 307	ENST00000269305	5	4	0.0952	0.2016	0.1532	0.4355	0.104
TP53:244:01:ENST00000269305	5	OV	1	TP53	244 vs 342	ENST00000269305	5	4	0.0952	0.1898	0.145	0.3437	0.0728
TP53:261:01:ENST00000269305	4	OV	1	TP53	261 vs 282	ENST00000269305	4	5	0.0952	0	0.9993	0.9326	0.7052
TP53:266:01:ENST00000269305	5	OV	1	TP53	266 vs 275	ENST00000269305	5	4	0.0952	6.3625	0.0978	1	1
TP53:281:01:ENST00000269305	4	OV	1	TP53	281 vs 282	ENST00000269305	4	5	0.0952	0	0.9993	0.9741	0.8194
PTEN:170:01:ENST00000371953	4	UCEC	1	PTEN	170 vs 290	ENST00000371953	4	6	0.0952	NA	0.9995	0.9322	0.7067
PTEN:170:01:ENST00000371953	4	UCEC	1	PTEN	170 vs 343	ENST00000371953	4	5	0.0952	NA	0.9995	0.9999	0.9873
TP53:126:01:ENST00000269305	6	LUSC	1	TP53	126 vs 331	ENST00000269305	6	7	0.0956	6.6359	0.1081	0.8355	0.5506
PIK3CA:118:01:ENST00000263967	9	UCEC	1	PIK3CA	118 vs 545	ENST00000263967	9	26	0.0961	4.486	0.1031	0.9952	0.9256
TP53:179:01:ENST00000269305	5	OV	1	TP53	179 vs 220	ENST00000269305	5	8	0.0963	0.1959	0.1471	0.9981	0.9514
TP53:220:01:ENST00000269305	8	OV	1	TP53	220 vs 234	ENST00000269305	8	5	0.0963	NA	0.9991	0.5572	0.2895
TP53:195:01:ENST00000269305	12	OV	1	TP53	195 vs 244	ENST00000269305	12	5	0.0966	4.3177	0.1782	0.7849	0.481
TP53:248:01:ENST00000269305	10	LUSC	1	TP53	248 vs 249	ENST00000269305	10	7	0.097	4.8474	0.1501	0.6163	0.3318
TP53:245:01:ENST00000269305	9	HNSC	1	TP53	245 vs 298	ENST00000269305	9	5	0.0979	0.2734	0.0919	0.9869	0.8732
TP53:110:01:ENST00000269305	5	BRCA	1	TP53	110 vs 213	ENST00000269305	5	6	0.0996	NA	0.9996	0.8313	0.544
TP53:132:01:ENST00000269305	5	BRCA	1	TP53	132 vs 213	ENST00000269305	5	6	0.0996	NA	0.9996	0.6642	0.3698
TP53:220:01:ENST00000269305	5	LUSC	1	TP53	220 vs 245	ENST00000269305	5	14	0.1006	3.0655	0.0999	0.8974	0.6248
TP53:172:01:ENST00000269305	4	LUSC	1	TP53	172 vs 234	ENST00000269305	4	9	0.1007	0	0.9991	0.1285	0.0457
TP53:158:01:ENST00000269305	16	LUSC	1	TP53	158 vs 248	ENST00000269305	16	10	0.1009	0.2826	0.0659	0.3265	0.1602
ARID1A:1072:01:ENST00000324856	7	UCEC	1	ARID1A	1072 vs 1276	ENST00000324856	7	6	0.1026	0	0.9997	0.7172	0.418
TP53:163:01:ENST00000269305	7	LUSC	1	TP53	163 vs 280	ENST00000269305	7	4	0.103	0.1404	0.0901	0.9833	0.8519
ARID1A:1072:01:ENST00000324856	7	UCEC	1	ARID1A	1072 vs 766	ENST00000324856	7	4	0.103	0	0.9996	0.7262	0.4179
TP53:125:01:ENST00000269305	7	LUSC	1	TP53	125 vs 273	ENST00000269305	7	14	0.1033	0.2168	0.161	0.9744	0.8191
ARID1A:1072:01:ENST00000324856	7	UCEC	1	ARID1A	1072 vs 2141	ENST00000324856	7	5	0.1035	0	0.9997	0.2444	0.0921
ARID1A:1072:01:ENST00000324856	7	UCEC	1	ARID1A	1072 vs 551	ENST00000324856	7	5	0.1035	0	0.9996	0.8445	0.5594
TP53:273:01:ENST00000269305	6	GBM	1	TP53	273 vs 282	ENST00000269305	6	6	0.1039	0.1972	0.1396	0.6418	0.3249
TP53:175:01:ENST00000269305	11	ESCA	1	TP53	175 vs 282	ENST00000269305	11	4	0.104	0.1218	0.0917	0.5614	0.3277
TP53:306:01:ENST00000269305	6	HNSC	1	TP53	306 vs 331	ENST00000269305	6	4	0.1048	3.8869	0.1116	0.6703	0.2783
TP53:187:01:ENST00000269305	6	LUSC	1	TP53	187 vs 280	ENST00000269305	6	4	0.1048	0.1505	0.1031	0.8598	0.6049
TP53:176:01:ENST00000269305	8	OV	1	TP53	176 vs 266	ENST00000269305	8	5	0.1057	0.3351	0.1074	0.6221	0.2137
TP53:192:01:ENST00000269305	4	BLCA	1	TP53	192 vs 248	ENST00000269305	4	22	0.1064	0.2694	0.208	0.9983	0.9533
TP53:242:01:ENST00000269305	5	LUSC	1	TP53	242 vs 248	ENST00000269305	5	10	0.1066	0.1962	0.153	0.9371	0.7166
TP53:248:01:ENST00000269305	21	OV	1	TP53	248 vs 281	ENST00000269305	21	4	0.107	4.1331	0.1765	0.8089	0.5315
TP53:176:01:ENST00000269305	6	BRCA	1	TP53	176 vs 248	ENST00000269305	6	8	0.1072	0	0.9994	0.9363	0.7167
CTNNB1:33:01:ENST00000349496	27	UCEC	1	CTNNB1	33 vs 37	ENST00000349496	26	19	0.1077	0.2722	0.1202	0.6843	0.3776
PTEN:127:01:ENST00000371953	6	UCEC	1	PTEN	127 vs 290	ENST00000371953	5	6	0.1082	NA	0.9996	0.6224	0.3254
TP53:193:01:ENST00000269305	9	HNSC	1	TP53	193 vs 331	ENST00000269305	9	4	0.1091	3.265	0.1483	0.9358	0.7123
TP53:278:01:ENST00000269305	10	LUSC	1	TP53	278 vs 282	ENST00000269305	10	6	0.1091	0.1973	0.1646	0.9919	0.898
TP53:193:01:ENST00000269305	9	HNSC	1	TP53	193 vs 213	ENST00000269305	9	11	0.1101	2.6473	0.1062	0.9957	0.9257
TP53:132:01:ENST00000269305	4	COAD	1	TP53	132 vs 273	ENST00000269305	4	19	0.1107	3.369	0.1156	0.6761	0.3325
TP53:163:01:ENST00000269305	9	OV	1	TP53	163 vs 234	ENST00000269305	9	5	0.1109	NA	0.9991	0.9778	0.8324
TP53:220:01:ENST00000269305	5	HNSC	1	TP53	220 vs 224	ENST00000269305	5	4	0.1111	0	0.9994	0.944	0.7383
TP53:220:01:ENST00000269305	5	LUSC	1	TP53	220 vs 266	ENST00000269305	5	5	0.1111	4.6367	0.1711	0.8201	0.5162
TP53:193:01:ENST00000269305	5	OV	1	TP53	193 vs 282	ENST00000269305	5	5	0.1111	0.1105	0.062	0.2708	0.0673
TP53:244:01:ENST00000269305	5	OV	1	TP53	244 vs 261	ENST00000269305	5	4	0.1111	0.1917	0.1536	0.9907	0.8922
TP53:266:01:ENST00000269305	5	OV	1	TP53	266 vs 307	ENST00000269305	5	4	0.1111	3.9556	0.1062	1	1
TP53:248:01:ENST00000269305	21	OV	1	TP53	248 vs 275	ENST00000269305	21	4	0.1119	2.7868	0.1889	0.4269	0.1549
PIK3CA:1021:01:ENST00000263967	4	UCEC	1	PIK3CA	1021 vs 118	ENST00000263967	4	9	0.1119	0	0.9993	0.9639	0.7873
TP53:242:01:ENST00000269305	5	LUSC	1	TP53	242 vs 273	ENST00000269305	5	14	0.1125	0.2073	0.1644	0.8355	0.5406
TP53:179:01:ENST00000269305	5	OV	1	TP53	179 vs 241	ENST00000269305	5	6	0.1126	0.1998	0.1518	0.72	0.3964
TP53:126:01:ENST00000269305	7	BRCA	1	TP53	126 vs 331	ENST00000269305	7	5	0.1136	NA	0.9994	0.8841	0.606
TP53:157:01:ENST00000269305	4	BRCA	1	TP53	157 vs 173	ENST00000269305	4	4	0.1143	0	0.9996	0.8834	0.6217
TP53:157:01:ENST00000269305	4	BRCA	1	TP53	157 vs 194	ENST00000269305	4	4	0.1143	0	0.9997	0.5844	0.2898
TP53:194:01:ENST00000269305	4	BRCA	1	TP53	194 vs 278	ENST00000269305	4	4	0.1143	NA	0.9997	0.4983	0.2317
TP53:187:01:ENST00000269305	4	ESCA	1	TP53	187 vs 213	ENST00000269305	4	4	0.1143	0	0.9993	0.7057	0.3904
TP53:158:01:ENST00000269305	4	LGG	1	TP53	158 vs 173	ENST00000269305	4	4	0.1143	NA	0.9996	0.987	0.8716
TP53:172:01:ENST00000269305	4	LUSC	1	TP53	172 vs 225	ENST00000269305	4	4	0.1143	0	0.9996	0.9147	0.675
TP53:151:01:ENST00000269305	5	HNSC	1	TP53	151 vs 245	ENST00000269305	5	9	0.1149	3.3046	0.1251	0.8773	0.5623
TP53:154:01:ENST00000269305	7	LUSC	1	TP53	154 vs 280	ENST00000269305	7	4	0.1152	0.2251	0.1075	0.4656	0.2857
TP53:173:01:ENST00000269305	7	HNSC	1	TP53	173 vs 306	ENST00000269305	7	6	0.1154	0.3285	0.1311	0.935	0.7184
TP53:175:01:ENST00000269305	12	HNSC	1	TP53	175 vs 236	ENST00000269305	12	4	0.1154	NA	0.9986	0.9065	0.6636
TP53:193:01:ENST00000269305	7	LUSC	1	TP53	193 vs 220	ENST00000269305	7	5	0.1162	0.1915	0.153	0.4868	0.198
TP53:105:01:ENST00000269305	5	LUSC	1	TP53	105 vs 126	ENST00000269305	5	6	0.1169	0.229	0.0964	0.3259	0.0828
TP53:175:01:ENST00000269305	8	LUSC	1	TP53	175 vs 331	ENST00000269305	8	7	0.1172	4.8261	0.1627	0.7105	0.4093
TP53:187:01:ENST00000269305	10	OV	1	TP53	187 vs 245	ENST00000269305	10	8	0.1172	3.0835	0.1253	0.9903	0.8891
PIK3CA:111:01:ENST00000263967	5	BRCA	1	PIK3CA	111 vs 545	ENST00000263967	5	60	0.1175	2.6382	0.2739	0.1648	0.033
TP53:126:01:ENST00000269305	6	LUSC	1	TP53	126 vs 234	ENST00000269305	6	9	0.1187	3.9169	0.0592	0.3248	0.1606
TP53:220:01:ENST00000269305	5	HNSC	1	TP53	220 vs 280	ENST00000269305	5	5	0.119	0	0.9993	0.9944	0.9159
TP53:225:01:ENST00000269305	4	LUSC	1	TP53	225 vs 273	ENST00000269305	4	14	0.1216	0	0.9992	0.9859	0.8649
TP53:151:01:ENST00000269305	5	HNSC	1	TP53	151 vs 179	ENST00000269305	5	8	0.1228	3.426	0.1575	0.8897	0.6164
TP53:281:01:ENST00000269305	4	OV	1	TP53	281 vs 331	ENST00000269305	4	6	0.1238	0	0.9993	0.8686	0.5947
TP53:213:01:ENST00000269305	10	COAD	1	TP53	213 vs 245	ENST00000269305	10	4	0.1239	1	NA	0.1444	0.0745
TP53:213:01:ENST00000269305	10	COAD	1	TP53	213 vs 266	ENST00000269305	10	4	0.1239	1	NA	0.5976	0.3288
TP53:220:01:ENST00000269305	5	HNSC	1	TP53	220 vs 248	ENST00000269305	5	13	0.1242	0	0.9991	1	0.9924
SCAF4:120:01:ENST00000286835	4	UCEC	1	SCAF4	120 vs 250	ENST00000286835	4	12	0.1242	NA	0.9996	0.7153	0.4371
TP53:175:01:ENST00000269305	11	ESCA	1	TP53	175 vs 273	ENST00000269305	11	9	0.1253	0.2097	0.167	0.8484	0.5629
TP53:179:01:ENST00000269305	8	HNSC	1	TP53	179 vs 32	ENST00000269305	8	4	0.1253	0.2236	0.107	0.9805	0.846
TP53:157:01:ENST00000269305	14	LUSC	1	TP53	157 vs 220	ENST00000269305	14	5	0.1254	0.3679	0.14	0.8274	0.5128
TP53:161:01:ENST00000269305	5	BLCA	1	TP53	161 vs 285	ENST00000269305	4	10	0.1259	3.8754	0.0996	0.9989	0.9625
TP53:163:01:ENST00000269305	9	OV	1	TP53	163 vs 244	ENST00000269305	9	5	0.1259	4.3326	0.183	0.5408	0.2767
TP53:220:01:ENST00000269305	7	UCEC	1	TP53	220 vs 273	ENST00000269305	7	21	0.1267	0	0.9987	0.9544	0.7578
EGFR:252:01:ENST00000275493	5	LGG	1	EGFR	252 vs 289	ENST00000275493	5	4	0.127	5.5137	0.1349	0.9533	0.7542
TP53:105:01:ENST00000269305	5	LUSC	1	TP53	105 vs 280	ENST00000269305	5	4	0.127	0.1628	0.1198	0.1353	0.0728
TP53:187:01:ENST00000269305	5	BRCA	1	TP53	187 vs 196	ENST00000269305	5	8	0.1274	NA	0.9996	0.9762	0.8268
TP53:196:01:ENST00000269305	8	BRCA	1	TP53	196 vs 242	ENST00000269305	8	5	0.1274	0	0.9996	0.7604	0.4694
TP53:196:01:ENST00000269305	8	BRCA	1	TP53	196 vs 245	ENST00000269305	8	5	0.1274	0	0.9996	0.6358	0.3525
FBXW7:423:01:ENST00000281708	8	UCEC	1	FBXW7	423 vs 505	ENST00000281708	8	12	0.1294	4.8884	0.2022	0.2605	0.1228
TP53:187:01:ENST00000269305	5	BRCA	1	TP53	187 vs 213	ENST00000269305	5	6	0.1299	NA	0.9997	0.7698	0.4714
TP53:213:01:ENST00000269305	6	BRCA	1	TP53	213 vs 242	ENST00000269305	6	5	0.1299	0	0.9996	0.9836	0.8553
TP53:213:01:ENST00000269305	6	BRCA	1	TP53	213 vs 245	ENST00000269305	6	5	0.1299	0	0.9996	0.9255	0.6938
TP53:248:01:ENST00000269305	14	LGG	1	TP53	248 vs 280	ENST00000269305	14	4	0.1301	0.298	0.1917	0.4507	0.1641
TP53:176:01:ENST00000269305	8	OV	1	TP53	176 vs 187	ENST00000269305	8	10	0.1301	0.3691	0.1307	0.9965	0.9333
TP53:238:01:ENST00000269305	5	OV	1	TP53	238 vs 245	ENST00000269305	5	8	0.1305	NA	0.9993	0.9523	0.7567
TP53:193:01:ENST00000269305	9	HNSC	1	TP53	193 vs 337	ENST00000269305	9	5	0.1309	3.0159	0.1718	0.5521	0.2673
KRAS:12:01:ENST00000256078	65	UCEC	1	KRAS	12 vs 13	ENST00000256078	65	14	0.1312	NA	0.9986	0.589	0.3194
TP53:175:01:ENST00000269305	7	LGG	1	TP53	175 vs 245	ENST00000269305	7	6	0.1317	0	0.9996	0.2653	0.1019
PIK3CA:108:01:ENST00000263967	6	UCEC	1	PIK3CA	108 vs 420	ENST00000263967	6	7	0.1317	NA	0.9996	0.1176	0.0358
PIK3CA:344:01:ENST00000263967	7	UCEC	1	PIK3CA	344 vs 93	ENST00000263967	7	8	0.1321	NA	0.9996	0.7951	0.4959
TP53:126:01:ENST00000269305	6	LUSC	1	TP53	126 vs 273	ENST00000269305	6	14	0.1324	2.8579	0.1124	0.8625	0.6029
PIK3CA:111:01:ENST00000263967	4	UCEC	1	PIK3CA	111 vs 545	ENST00000263967	4	26	0.1328	0	0.9993	0.5028	0.2093
KRAS:12:01:ENST00000256078	15	STAD	1	KRAS	12 vs 13	ENST00000256078	15	6	0.1332	0.2685	0.0893	0.4819	0.2679
TP53:135:01:ENST00000269305	4	BRCA	1	TP53	135 vs 179	ENST00000269305	4	8	0.1333	NA	0.9996	0.0542	0.0101
TP53:175:01:ENST00000269305	8	LUSC	1	TP53	175 vs 193	ENST00000269305	8	7	0.1333	4.4612	0.1828	0.7647	0.4765
PTEN:290:01:ENST00000371953	6	UCEC	1	PTEN	290 vs 342	ENST00000371953	6	4	0.1333	0	0.9996	0.9992	0.9732
PTEN:290:01:ENST00000371953	6	UCEC	1	PTEN	290 vs 57	ENST00000371953	6	4	0.1333	0	0.9994	0.9686	0.7989
TP53:179:01:ENST00000269305	5	OV	1	TP53	179 vs 272	ENST00000269305	5	6	0.1342	0.2109	0.1845	0.9904	0.8891
TP53:176:01:ENST00000269305	5	COAD	1	TP53	176 vs 213	ENST00000269305	5	10	0.1345	NA	0.9995	0.9999	0.9887
TP53:105:01:ENST00000269305	5	LUSC	1	TP53	105 vs 220	ENST00000269305	5	5	0.1349	0.2602	0.1266	0.9311	0.7096
TP53:125:01:ENST00000269305	7	LUSC	1	TP53	125 vs 234	ENST00000269305	7	9	0.1355	0.2153	0.1583	0.1214	0.032
PTEN:170:01:ENST00000371953	4	UCEC	1	PTEN	170 vs 323	ENST00000371953	4	11	0.1363	7.2716	0.1111	0.9642	0.7904
PTEN:130:01:ENST00000371953	66	UCEC	1	PTEN	130 vs 136	ENST00000371953	63	7	0.137	0.2624	0.1043	0.9997	0.9804
TP53:179:01:ENST00000269305	9	LUSC	1	TP53	179 vs 234	ENST00000269305	9	9	0.1387	0.3807	0.1617	0.2899	0.0992
TP53:244:01:ENST00000269305	6	LUSC	1	TP53	244 vs 249	ENST00000269305	6	7	0.1387	5.6298	0.1464	0.7372	0.4375
TP53:136:01:ENST00000269305	5	HNSC	1	TP53	136 vs 163	ENST00000269305	5	7	0.1389	NA	0.9993	0.9701	0.8072
TP53:163:01:ENST00000269305	7	HNSC	1	TP53	163 vs 280	ENST00000269305	7	5	0.1389	0.1527	0.1093	0.9564	0.7682
PTEN:323:01:ENST00000371953	11	UCEC	1	PTEN	323 vs 57	ENST00000371953	11	4	0.1407	0.1427	0.1188	0.8927	0.6445
TP53:187:01:ENST00000269305	10	OV	1	TP53	187 vs 273	ENST00000269305	10	19	0.141	2.5704	0.0839	0.5525	0.2995
APC:1114:01:ENST00000257430	7	COAD	1	APC	1114 vs 1450	ENST00000257430	7	19	0.1413	0	0.9987	0.8588	0.5868
CDKN2A:110:01:ENST00000304494	8	HNSC	1	CDKN2A	110 vs 88	ENST00000304494	8	4	0.1414	3.7396	0.2308	0.9051	0.6622
PIK3CA:111:01:ENST00000263967	4	UCEC	1	PIK3CA	111 vs 345	ENST00000263967	4	8	0.1414	0	0.9996	0.6074	0.3094
PIK3CA:111:01:ENST00000263967	5	BRCA	1	PIK3CA	111 vs 542	ENST00000263967	5	38	0.1424	3.9384	0.1368	0.7502	0.4249
PIK3CA:1044:01:ENST00000263967	6	UCEC	1	PIK3CA	1044 vs 93	ENST00000263967	6	8	0.1425	NA	0.9996	0.8792	0.6163
PIK3CA:108:01:ENST00000263967	6	UCEC	1	PIK3CA	108 vs 93	ENST00000263967	6	8	0.1425	NA	0.9996	0.6765	0.3708
APC:1378:01:ENST00000257430	6	COAD	1	APC	1378 vs 1489	ENST00000257430	6	4	0.1429	NA	0.9994	0.8574	0.5742
TP53:158:01:ENST00000269305	4	GBM	1	TP53	158 vs 273	ENST00000269305	4	6	0.1429	3.996	0.2188	0.2464	0.0395
TP53:179:01:ENST00000269305	4	GBM	1	TP53	179 vs 238	ENST00000269305	4	4	0.1429	0.183	0.1374	1	1
TP53:176:01:ENST00000269305	6	HNSC	1	TP53	176 vs 32	ENST00000269305	6	4	0.1429	0.2555	0.1427	0.9596	0.7797
TP53:236:01:ENST00000269305	4	HNSC	1	TP53	236 vs 32	ENST00000269305	4	4	0.1429	0	0.9993	0.9999	0.9882
TP53:294:01:ENST00000269305	4	HNSC	1	TP53	294 vs 32	ENST00000269305	4	4	0.1429	0.1728	0.1389	0.9948	0.9178
TP53:125:01:ENST00000269305	4	LGG	1	TP53	125 vs 280	ENST00000269305	4	4	0.1429	5.8063	0.1326	0.8434	0.5729
TP53:159:01:ENST00000269305	4	LUAD	1	TP53	159 vs 193	ENST00000269305	4	5	0.1429	NA	0.9993	0.1155	0.0126
TP53:135:01:ENST00000269305	4	LUSC	1	TP53	135 vs 172	ENST00000269305	4	4	0.1429	NA	0.9996	0.7896	0.4989
TP53:135:01:ENST00000269305	4	LUSC	1	TP53	135 vs 225	ENST00000269305	4	4	0.1429	NA	0.9996	0.7896	0.4989
TP53:172:01:ENST00000269305	4	LUSC	1	TP53	172 vs 280	ENST00000269305	4	4	0.1429	0	0.9993	0.9596	0.7797
TP53:225:01:ENST00000269305	4	LUSC	1	TP53	225 vs 280	ENST00000269305	4	4	0.1429	0	0.9993	0.6471	0.395
TP53:280:01:ENST00000269305	4	LUSC	1	TP53	280 vs 282	ENST00000269305	4	6	0.1429	3.9134	0.1427	0.6471	0.395
TP53:238:01:ENST00000269305	5	OV	1	TP53	238 vs 244	ENST00000269305	5	5	0.1429	5.5018	0.1679	0.145	0.0258
TP53:273:01:ENST00000269305	5	PAAD	1	TP53	273 vs 282	ENST00000269305	5	5	0.1429	0.186	0.1409	0.926	0.7002
CSMD3:258:06:ENST00000297405	4	SKCM	6	CSMD3	258 vs 334	ENST00000297405	4	4	0.1429	NA	0.9994	0.529	0.2715
RP1:1055:06:ENST00000220676	4	SKCM	6	RP1	1055 vs 1118	ENST00000220676	4	4	0.1429	NA	0.9994	0.9618	0.7825
RP1:1118:06:ENST00000220676	4	SKCM	6	RP1	1118 vs 1282	ENST00000220676	4	4	0.1429	0	0.9993	0.1353	0.0728
PRKDC:2704:01:ENST00000314191	4	UCEC	1	PRKDC	2704 vs 3605	ENST00000314191	4	5	0.1429	NA	0.9996	0.54	0.259
PTEN:127:01:ENST00000371953	6	UCEC	1	PTEN	127 vs 343	ENST00000371953	5	5	0.1429	NA	0.9996	0.9999	0.9916
PTEN:16:01:ENST00000371953	4	UCEC	1	PTEN	16 vs 57	ENST00000371953	4	4	0.1429	0	0.9994	0.9996	0.977
PTEN:343:01:ENST00000371953	5	UCEC	1	PTEN	343 vs 57	ENST00000371953	5	4	0.1429	0	0.9994	0.9998	0.983
TP53:220:01:ENST00000269305	8	OV	1	TP53	220 vs 244	ENST00000269305	8	5	0.143	4.0266	0.2055	0.9929	0.9051
TP53:271:01:ENST00000269305	4	BLCA	1	TP53	271 vs 280	ENST00000269305	4	13	0.1437	3.3863	0.1154	0.2413	0.028
PTEN:130:01:ENST00000371953	66	UCEC	1	PTEN	130 vs 7	ENST00000371953	63	4	0.145	NA	0.9987	0.434	0.1637
TP53:161:01:ENST00000269305	5	BLCA	1	TP53	161 vs 331	ENST00000269305	4	7	0.1455	3.7016	0.1533	0.999	0.9636
TP53:248:01:ENST00000269305	4	LUAD	1	TP53	248 vs 249	ENST00000269305	4	8	0.1455	0	0.9993	0.9547	0.7592
TP53:175:01:ENST00000269305	15	OV	1	TP53	175 vs 307	ENST00000269305	15	4	0.1455	0.4393	0.2232	0.3291	0.0495
PTEN:170:01:ENST00000371953	4	UCEC	1	PTEN	170 vs 267	ENST00000371953	4	9	0.1455	6.8229	0.1255	0.8225	0.5413
PTEN:170:01:ENST00000371953	4	UCEC	1	PTEN	170 vs 268	ENST00000371953	4	8	0.1455	NA	0.9994	0.2798	0.0989
TP53:248:01:ENST00000269305	8	BRCA	1	TP53	248 vs 331	ENST00000269305	8	5	0.1476	NA	0.9994	0.9163	0.6744
PIK3CA:1021:01:ENST00000263967	4	UCEC	1	PIK3CA	1021 vs 38	ENST00000263967	4	10	0.1499	0	0.9992	0.4575	0.2246
TP53:176:01:ENST00000269305	5	LUSC	1	TP53	176 vs 234	ENST00000269305	5	9	0.1508	3.063	0.0984	0.8007	0.3911
TP53:245:01:ENST00000269305	4	BLCA	1	TP53	245 vs 273	ENST00000269305	4	7	0.1515	0.2455	0.2131	0.9704	0.8057
TP53:175:01:ENST00000269305	12	HNSC	1	TP53	175 vs 193	ENST00000269305	12	9	0.1527	0.4352	0.1336	0.9932	0.9067
PIK3CA:38:01:ENST00000263967	10	UCEC	1	PIK3CA	38 vs 546	ENST00000263967	10	18	0.1533	2.9733	0.1558	0.2525	0.0831
TP53:135:01:ENST00000269305	4	BRCA	1	TP53	135 vs 193	ENST00000269305	4	9	0.1538	NA	0.9996	0.2767	0.0915
PIK3CA:1044:01:ENST00000263967	6	UCEC	1	PIK3CA	1044 vs 420	ENST00000263967	6	7	0.1538	NA	0.9996	0.5629	0.2751
TP53:179:01:ENST00000269305	5	OV	1	TP53	179 vs 331	ENST00000269305	5	7	0.154	0.1881	0.1717	0.0245	0.0034
PIK3CA:1047:01:ENST00000263967	16	COAD	1	PIK3CA	1047 vs 545	ENST00000263967	16	31	0.1553	0.2674	0.2241	0.7222	0.4169
TP53:220:01:ENST00000269305	8	OV	1	TP53	220 vs 282	ENST00000269305	8	5	0.1554	0.2431	0.1258	0.9409	0.7312
PIK3CA:1043:01:ENST00000263967	7	UCEC	1	PIK3CA	1043 vs 93	ENST00000263967	7	8	0.1554	NA	0.9996	0.9746	0.8198
PIK3CA:111:01:ENST00000263967	4	UCEC	1	PIK3CA	111 vs 546	ENST00000263967	4	18	0.1558	0	0.9991	0.6035	0.2914
TP53:173:01:ENST00000269305	4	LGG	1	TP53	173 vs 179	ENST00000269305	4	9	0.1566	0	0.9994	0.9998	0.9852
TP53:179:01:ENST00000269305	5	OV	1	TP53	179 vs 245	ENST00000269305	5	8	0.157	0.2429	0.2233	0.9398	0.7252
TP53:175:01:ENST00000269305	19	BRCA	1	TP53	175 vs 282	ENST00000269305	19	5	0.1576	0.1478	0.1192	0.9799	0.8424
TP53:248:01:ENST00000269305	21	OV	1	TP53	248 vs 278	ENST00000269305	21	6	0.1578	2.2703	0.2119	0.9809	0.8431
TP53:179:01:ENST00000269305	8	HNSC	1	TP53	179 vs 298	ENST00000269305	8	5	0.1585	0.312	0.181	0.7954	0.4792
TP53:173:01:ENST00000269305	4	BRCA	1	TP53	173 vs 331	ENST00000269305	4	5	0.1587	NA	0.9997	0.4197	0.2049
TP53:194:01:ENST00000269305	4	BRCA	1	TP53	194 vs 225	ENST00000269305	4	5	0.1587	NA	0.9997	0.7177	0.4192
TP53:236:01:ENST00000269305	4	HNSC	1	TP53	236 vs 337	ENST00000269305	4	5	0.1587	0	0.9994	0.9653	0.7911
TP53:193:01:ENST00000269305	5	OV	1	TP53	193 vs 238	ENST00000269305	5	5	0.1587	0	0.9994	0.145	0.0258
TP53:237:01:ENST00000269305	5	OV	1	TP53	237 vs 275	ENST00000269305	5	4	0.1587	5.4635	0.1374	0.6703	0.2783
TP53:238:01:ENST00000269305	5	OV	1	TP53	238 vs 261	ENST00000269305	5	4	0.1587	NA	0.9995	0.5944	0.2971
TP53:238:01:ENST00000269305	5	OV	1	TP53	238 vs 281	ENST00000269305	5	4	0.1587	NA	0.9994	0.9322	0.7067
TP53:261:01:ENST00000269305	4	OV	1	TP53	261 vs 266	ENST00000269305	4	5	0.1587	0.3098	0.1736	0.5353	0.2028
PIK3CA:118:01:ENST00000263967	9	UCEC	1	PIK3CA	118 vs 88	ENST00000263967	9	16	0.1587	4.4134	0.2003	0.8942	0.6336
PIK3R1:567:01:ENST00000521381	4	UCEC	1	PIK3R1	567 vs 575	ENST00000521381	4	5	0.1587	0	0.9994	0.9984	0.9545
PIK3R1:575:01:ENST00000521381	5	UCEC	1	PIK3R1	575 vs 577	ENST00000521381	5	5	0.1587	NA	0.9994	0.9946	0.9172
PTEN:127:01:ENST00000371953	6	UCEC	1	PTEN	127 vs 170	ENST00000371953	5	4	0.1587	0	0.9995	0.9919	0.8986
TP53:158:01:ENST00000269305	16	LUSC	1	TP53	158 vs 175	ENST00000269305	16	8	0.1593	0.3405	0.1083	0.7819	0.4864
TP53:163:01:ENST00000269305	9	OV	1	TP53	163 vs 175	ENST00000269305	9	15	0.1604	2.5957	0.1386	0.7898	0.5047
TP53:192:01:ENST00000269305	5	OV	1	TP53	192 vs 248	ENST00000269305	5	21	0.1606	0.2729	0.2117	0.6968	0.4136
TP53:175:01:ENST00000269305	8	LUSC	1	TP53	175 vs 179	ENST00000269305	8	9	0.161	3.0667	0.1504	0.733	0.4309
TP53:175:01:ENST00000269305	19	BRCA	1	TP53	175 vs 331	ENST00000269305	19	5	0.1613	NA	0.9994	0.8067	0.4998
TP53:126:01:ENST00000269305	6	LUSC	1	TP53	126 vs 271	ENST00000269305	6	4	0.1619	4.6132	0.1772	0.7947	0.4935
PTEN:267:01:ENST00000371953	9	UCEC	1	PTEN	267 vs 57	ENST00000371953	9	4	0.1622	0.1667	0.1566	0.6976	0.4155
TP53:176:01:ENST00000269305	8	OV	1	TP53	176 vs 282	ENST00000269305	8	5	0.1632	0.2392	0.0872	0.5568	0.2906
PIK3CA:111:01:ENST00000263967	5	BRCA	1	PIK3CA	111 vs 726	ENST00000263967	5	9	0.1648	NA	0.9994	0.2318	0.0828
TP53:175:01:ENST00000269305	11	ESCA	1	TP53	175 vs 220	ENST00000269305	11	4	0.1656	0	0.9995	0.1001	0.0639
PIK3CA:344:01:ENST00000263967	7	UCEC	1	PIK3CA	344 vs 38	ENST00000263967	7	10	0.1656	0.2491	0.2157	0.8734	0.6034
CTNNB1:32:01:ENST00000349496	14	UCEC	1	CTNNB1	32 vs 37	ENST00000349496	14	19	0.1657	0.2466	0.2024	0.897	0.6418
TP53:157:01:ENST00000269305	14	LUSC	1	TP53	157 vs 249	ENST00000269305	14	7	0.1665	3.7246	0.2253	0.926	0.6934
TP53:136:01:ENST00000269305	5	HNSC	1	TP53	136 vs 220	ENST00000269305	5	5	0.1667	NA	0.9993	0.9361	0.7182
ARID1A:1989:01:ENST00000324856	5	UCEC	1	ARID1A	1989 vs 551	ENST00000324856	5	5	0.1667	0	0.9996	0.0994	0.035
CCND1:286:01:ENST00000227507	7	UCEC	1	CCND1	286 vs 291	ENST00000227507	7	5	0.1667	0	0.9996	0.897	0.646
TP53:125:01:ENST00000269305	7	LUSC	1	TP53	125 vs 157	ENST00000269305	7	14	0.1675	0.2587	0.2228	0.9807	0.8439
TP53:175:01:ENST00000269305	19	BRCA	1	TP53	175 vs 194	ENST00000269305	19	4	0.1676	0	0.9994	0.5408	0.3053
TP53:248:01:ENST00000269305	13	HNSC	1	TP53	248 vs 32	ENST00000269305	13	4	0.1681	0.315	0.1205	0.9229	0.7039
NFE2L2:29:01:ENST00000397062	14	LUSC	1	NFE2L2	29 vs 31	ENST00000397062	14	6	0.1681	3.921	0.1982	0.9137	0.6675
TP53:248:01:ENST00000269305	12	GBM	1	TP53	248 vs 282	ENST00000269305	12	6	0.1691	0.4043	0.1439	0.9992	0.9677
TP53:173:01:ENST00000269305	4	BRCA	1	TP53	173 vs 179	ENST00000269305	4	8	0.1697	1	NA	0.7261	0.4127
TP53:175:01:ENST00000269305	8	LUSC	1	TP53	175 vs 225	ENST00000269305	8	4	0.1697	3.798	0.2347	0.9963	0.912
PTEN:170:01:ENST00000371953	4	UCEC	1	PTEN	170 vs 212	ENST00000371953	4	7	0.1697	NA	0.9994	0.5116	0.2334
TP53:234:01:ENST00000269305	9	LUSC	1	TP53	234 vs 245	ENST00000269305	9	14	0.1703	2.136	0.1944	0.1829	0.0452
TP53:159:01:ENST00000269305	4	BLCA	1	TP53	159 vs 161	ENST00000269305	4	4	0.1714	0.1966	0.1602	0.9311	0.7096
TP53:245:01:ENST00000269305	4	BLCA	1	TP53	245 vs 271	ENST00000269305	4	4	0.1714	0.1899	0.1569	0.4298	0.104
TP53:176:01:ENST00000269305	4	ESCA	1	TP53	176 vs 187	ENST00000269305	4	4	0.1714	NA	0.9993	0.4527	0.204
PTEN:170:01:ENST00000371953	4	UCEC	1	PTEN	170 vs 342	ENST00000371953	4	4	0.1714	NA	0.9995	0.884	0.6154
PTEN:57:01:ENST00000371953	4	UCEC	1	PTEN	57 vs 92	ENST00000371953	4	6	0.1714	NA	0.9994	0.9185	0.6747
TP53:205:01:ENST00000269305	4	UCEC	1	TP53	205 vs 245	ENST00000269305	4	4	0.1714	NA	0.9993	0.5616	0.2735
TP53:175:01:ENST00000269305	22	COAD	1	TP53	175 vs 282	ENST00000269305	22	10	0.1716	0.3607	0.2189	0.0177	0.0115
ARID1A:1335:01:ENST00000324856	4	UCEC	1	ARID1A	1335 vs 1850	ENST00000324856	4	17	0.1721	0	0.9994	0.2182	0.0585
ARID1A:1721:01:ENST00000324856	4	UCEC	1	ARID1A	1721 vs 1850	ENST00000324856	4	17	0.1721	0	0.9994	0.2319	0.0637
TP53:151:01:ENST00000269305	5	HNSC	1	TP53	151 vs 196	ENST00000269305	5	8	0.1725	2.8117	0.1884	0.8662	0.5771
TP53:220:01:ENST00000269305	5	HNSC	1	TP53	220 vs 282	ENST00000269305	5	8	0.1725	0	0.9992	0.9395	0.7249
TP53:175:01:ENST00000269305	22	COAD	1	TP53	175 vs 176	ENST00000269305	22	5	0.1732	0.2833	0.1695	0.6149	0.3635
TP53:151:01:ENST00000269305	5	HNSC	1	TP53	151 vs 278	ENST00000269305	5	4	0.1746	4.016	0.2166	0.8621	0.5823
TP53:32:01:ENST00000269305	4	HNSC	1	TP53	32 vs 337	ENST00000269305	4	5	0.1746	5.1122	0.1632	0.9987	0.9595
KIT:418:03:ENST00000288135	4	LAML	3	KIT	418 vs 816	ENST00000288135	4	5	0.1746	0	0.9993	0.4514	0.2262
PTEN:342:01:ENST00000371953	4	UCEC	1	PTEN	342 vs 343	ENST00000371953	4	5	0.1746	NA	0.9996	0.9923	0.9009
APC:1489:01:ENST00000257430	4	COAD	1	APC	1489 vs 876	ENST00000257430	4	11	0.1758	0	0.9993	0.7742	0.4661
TP53:220:01:ENST00000269305	5	LUSC	1	TP53	220 vs 331	ENST00000269305	5	7	0.1768	4.3623	0.205	0.3441	0.1163
TP53:175:01:ENST00000269305	8	UCEC	1	TP53	175 vs 193	ENST00000269305	8	4	0.1778	4.1516	0.2332	0.9022	0.6497
CDKN2A:58:01:ENST00000304494	10	HNSC	1	CDKN2A	58 vs 88	ENST00000304494	10	4	0.1798	3.4081	0.2703	0.9403	0.7271
TP53:176:01:ENST00000269305	5	LUSC	1	TP53	176 vs 248	ENST00000269305	5	9	0.1808	2.5209	0.2075	0.3465	0.0656
TP53:248:01:ENST00000269305	19	COAD	1	TP53	248 vs 282	ENST00000269305	19	11	0.1811	0.2509	0.1355	0.0375	0.0188
TP53:273:01:ENST00000269305	19	OV	1	TP53	273 vs 306	ENST00000269305	19	4	0.1816	0.4436	0.179	0.5387	0.1339
TP53:196:01:ENST00000269305	8	BRCA	1	TP53	196 vs 285	ENST00000269305	8	4	0.1818	0	0.9994	0.7741	0.4612
TP53:244:01:ENST00000269305	5	OV	1	TP53	244 vs 272	ENST00000269305	5	6	0.1818	0.2517	0.2408	0.9336	0.7076
PIK3R1:464:01:ENST00000521381	5	UCEC	1	PIK3R1	464 vs 576	ENST00000521381	4	7	0.1818	NA	0.9994	0.3261	0.1051
TP53:152:01:ENST00000269305	5	STAD	1	TP53	152 vs 282	ENST00000269305	5	5	0.1825	0.2429	0.2233	0.5985	0.2893
FBXW7:423:01:ENST00000281708	8	UCEC	1	FBXW7	423 vs 465	ENST00000281708	8	13	0.1826	4.6177	0.2137	0.693	0.4054
TP53:236:01:ENST00000269305	4	HNSC	1	TP53	236 vs 248	ENST00000269305	4	13	0.1832	0	0.9987	0.9789	0.8381
TP53:248:01:ENST00000269305	10	LUSC	1	TP53	248 vs 280	ENST00000269305	10	4	0.1838	0.3118	0.1322	0.9743	0.8241
APC:1378:01:ENST00000257430	6	COAD	1	APC	1378 vs 1414	ENST00000257430	6	6	0.184	4.6056	0.2143	0.5855	0.3086
TP53:135:01:ENST00000269305	7	ESCA	1	TP53	135 vs 175	ENST00000269305	7	11	0.1848	4.8122	0.1737	0.8446	0.5553
TP53:126:01:ENST00000269305	6	LUSC	1	TP53	126 vs 248	ENST00000269305	6	10	0.1848	2.772	0.1543	0.9412	0.725
TP53:266:01:ENST00000269305	5	LUSC	1	TP53	266 vs 278	ENST00000269305	5	10	0.1851	4.6454	0.2105	0.9284	0.7059
TP53:175:01:ENST00000269305	8	LUSC	1	TP53	175 vs 280	ENST00000269305	8	4	0.1859	0.298	0.145	0.9967	0.9583
TP53:151:01:ENST00000269305	5	HNSC	1	TP53	151 vs 176	ENST00000269305	5	6	0.1861	3.0477	0.2004	0.9979	0.9486
TP53:237:01:ENST00000269305	5	OV	1	TP53	237 vs 278	ENST00000269305	5	6	0.1861	3.1579	0.1917	0.93	0.6996
TP53:241:01:ENST00000269305	6	OV	1	TP53	241 vs 248	ENST00000269305	6	21	0.1865	0.4893	0.2364	0.7817	0.4678
TP53:175:01:ENST00000269305	22	COAD	1	TP53	175 vs 273	ENST00000269305	22	19	0.1866	0.3933	0.2037	0.3213	0.1401
TP53:213:01:ENST00000269305	6	BRCA	1	TP53	213 vs 248	ENST00000269305	6	8	0.1871	0	0.9994	0.9874	0.8736
TP53:176:01:ENST00000269305	8	OV	1	TP53	176 vs 248	ENST00000269305	8	21	0.1877	0.5025	0.2322	0.9919	0.8981
TP53:179:01:ENST00000269305	9	LGG	1	TP53	179 vs 220	ENST00000269305	9	9	0.1891	5.0436	0.1986	0.4445	0.2085
TP53:282:01:ENST00000269305	8	HNSC	1	TP53	282 vs 32	ENST00000269305	8	4	0.1899	0.3268	0.1523	0.9213	0.6967
TP53:271:01:ENST00000269305	4	BLCA	1	TP53	271 vs 336	ENST00000269305	4	5	0.1905	3.4917	0.1793	0.4412	0.1095
TP53:173:01:ENST00000269305	4	BRCA	1	TP53	173 vs 176	ENST00000269305	4	6	0.1905	NA	0.9997	0.3463	0.1751
TP53:220:01:ENST00000269305	5	GBM	1	TP53	220 vs 238	ENST00000269305	5	4	0.1905	0.3123	0.1855	0.7788	0.3678
TP53:157:01:ENST00000269305	4	HNSC	1	TP53	157 vs 298	ENST00000269305	4	5	0.1905	0.2509	0.2185	0.971	0.8096
TP53:236:01:ENST00000269305	4	HNSC	1	TP53	236 vs 280	ENST00000269305	4	5	0.1905	0	0.9993	0.9472	0.7408
TP53:220:01:ENST00000269305	5	LUSC	1	TP53	220 vs 271	ENST00000269305	5	4	0.1905	4.3011	0.1972	0.9993	0.971
TP53:234:01:ENST00000269305	5	OV	1	TP53	234 vs 241	ENST00000269305	5	6	0.1905	0	0.9993	0.555	0.2775
OR51S1:194:06:ENST00000322101	4	SKCM	6	OR51S1	194 vs 241	ENST00000322101	4	5	0.1905	4.0266	0.2293	0.8924	0.6235
TP53:110:01:ENST00000269305	5	BRCA	1	TP53	110 vs 175	ENST00000269305	5	19	0.192	0	0.9993	0.4107	0.1571
TP53:173:01:ENST00000269305	7	HNSC	1	TP53	173 vs 193	ENST00000269305	7	9	0.1921	0.4255	0.2176	0.9998	0.9844
GATA3:335:01:ENST00000346208	12	BRCA	1	GATA3	335 vs 350	ENST00000346208	12	4	0.1934	NA	0.9994	0.5338	0.2455
CTNNB1:34:01:ENST00000349496	14	UCEC	1	CTNNB1	34 vs 37	ENST00000349496	14	19	0.1936	0.2569	0.2155	0.9752	0.8225
TP53:175:01:ENST00000269305	8	UCEC	1	TP53	175 vs 245	ENST00000269305	8	4	0.1939	NA	0.9993	0.9923	0.9006
TP53:175:01:ENST00000269305	8	LUSC	1	TP53	175 vs 245	ENST00000269305	8	14	0.1943	2.6638	0.1542	0.9901	0.9036
TP53:152:01:ENST00000269305	5	STAD	1	TP53	152 vs 213	ENST00000269305	5	6	0.1948	0.2222	0.1974	0.9731	0.8138
TP53:248:01:ENST00000269305	12	GBM	1	TP53	248 vs 273	ENST00000269305	12	6	0.1949	3.6772	0.2236	0.4181	0.2085
TP53:175:01:ENST00000269305	15	OV	1	TP53	175 vs 238	ENST00000269305	15	5	0.1952	0.1031	0.0681	0.6284	0.3649
TP53:135:01:ENST00000269305	4	LUSC	1	TP53	135 vs 278	ENST00000269305	4	10	0.1958	6	0.2099	0.4381	0.2357
TP53:176:01:ENST00000269305	8	OV	1	TP53	176 vs 179	ENST00000269305	8	5	0.1958	3.8109	0.2328	0.9629	0.7848
TP53:179:01:ENST00000269305	5	OV	1	TP53	179 vs 273	ENST00000269305	5	19	0.1959	0.2852	0.2349	0.7364	0.4482
EGFR:222:01:ENST00000275493	5	GBM	1	EGFR	222 vs 289	ENST00000275493	5	21	0.1965	2.1204	0.1612	0.8314	0.4103
TP53:179:01:ENST00000269305	9	LUSC	1	TP53	179 vs 248	ENST00000269305	9	10	0.1971	0.3952	0.208	0.6885	0.3956
TP53:194:01:ENST00000269305	4	BRCA	1	TP53	194 vs 248	ENST00000269305	4	8	0.198	NA	0.9995	0.4542	0.2255
TP53:187:01:ENST00000269305	5	BRCA	1	TP53	187 vs 282	ENST00000269305	5	5	0.1984	0	0.9994	0.2339	0.0959
APC:1114:01:ENST00000257430	7	COAD	1	APC	1114 vs 876	ENST00000257430	7	12	0.1996	0	0.9992	0.3059	0.1348
TP53:132:01:ENST00000269305	4	BLCA	1	TP53	132 vs 192	ENST00000269305	4	4	0.2	NA	0.9994	0.098	0.0266
TP53:132:01:ENST00000269305	4	BLCA	1	TP53	132 vs 245	ENST00000269305	4	4	0.2	NA	0.9994	0.098	0.0266
TP53:159:01:ENST00000269305	4	BLCA	1	TP53	159 vs 245	ENST00000269305	4	4	0.2	NA	0.9994	0.098	0.0266
TP53:192:01:ENST00000269305	4	BLCA	1	TP53	192 vs 271	ENST00000269305	4	4	0.2	0.2147	0.186	0.4699	0.1207
TP53:157:01:ENST00000269305	4	HNSC	1	TP53	157 vs 32	ENST00000269305	4	4	0.2	0.2048	0.1769	0.8825	0.6274
TP53:125:01:ENST00000269305	4	LGG	1	TP53	125 vs 237	ENST00000269305	4	4	0.2	4.7919	0.1777	0.8874	0.634
TP53:179:01:ENST00000269305	4	UCEC	1	TP53	179 vs 245	ENST00000269305	4	4	0.2	NA	0.9996	1	0.9969
TP53:244:01:ENST00000269305	5	OV	1	TP53	244 vs 273	ENST00000269305	5	19	0.2001	0.3	0.2498	0.7498	0.4626
TP53:151:01:ENST00000269305	5	HNSC	1	TP53	151 vs 282	ENST00000269305	5	8	0.2005	2.618	0.1802	0.9775	0.834
TP53:158:01:ENST00000269305	4	LGG	1	TP53	158 vs 220	ENST00000269305	4	9	0.2014	NA	0.9995	0.4882	0.2564
TP53:175:01:ENST00000269305	15	OV	1	TP53	175 vs 244	ENST00000269305	15	5	0.2018	3.1921	0.2827	0.8197	0.5182
TP53:248:01:ENST00000269305	8	BRCA	1	TP53	248 vs 278	ENST00000269305	8	4	0.202	NA	0.9994	0.9577	0.7668
TP53:163:01:ENST00000269305	7	LUSC	1	TP53	163 vs 175	ENST00000269305	7	8	0.2026	0.2703	0.2423	0.6638	0.376
RHOB:172:01:ENST00000272233	5	BLCA	1	RHOB	172 vs 75	ENST00000272233	5	6	0.2035	0.2592	0.2284	0.774	0.4725
TP53:220:01:ENST00000269305	5	LUSC	1	TP53	220 vs 282	ENST00000269305	5	6	0.2035	2.862	0.2301	0.8644	0.5781
TP53:278:01:ENST00000269305	6	OV	1	TP53	278 vs 282	ENST00000269305	6	5	0.2035	0.1904	0.1558	0.8459	0.5706
TP53:135:01:ENST00000269305	4	BRCA	1	TP53	135 vs 342	ENST00000269305	4	9	0.2042	NA	0.9996	0.7147	0.4012
TP53:163:01:ENST00000269305	7	LUSC	1	TP53	163 vs 220	ENST00000269305	7	5	0.2045	0.2484	0.2293	0.4019	0.1475
TP53:234:01:ENST00000269305	5	OV	1	TP53	234 vs 331	ENST00000269305	5	7	0.2045	0	0.9993	0.9952	0.9221
TP53:193:01:ENST00000269305	9	BRCA	1	TP53	193 vs 225	ENST00000269305	9	5	0.2048	1	NA	0.6001	0.3038
TP53:193:01:ENST00000269305	9	BRCA	1	TP53	193 vs 280	ENST00000269305	9	5	0.2048	1	NA	0.7531	0.4438
TP53:193:01:ENST00000269305	9	BRCA	1	TP53	193 vs 331	ENST00000269305	9	5	0.2048	1	NA	0.1967	0.0654
TP53:225:01:ENST00000269305	5	BRCA	1	TP53	225 vs 342	ENST00000269305	5	9	0.2048	1	NA	0.6712	0.3634
TP53:331:01:ENST00000269305	5	BRCA	1	TP53	331 vs 342	ENST00000269305	5	9	0.2048	1	NA	0.4794	0.218
TP53:187:01:ENST00000269305	4	ESCA	1	TP53	187 vs 248	ENST00000269305	4	14	0.2052	0.3112	0.2769	0.786	0.5024
CDKN2A:108:01:ENST00000304494	6	LUSC	1	CDKN2A	108 vs 84	ENST00000304494	6	6	0.2056	2.6495	0.2346	0.3009	0.0604
TP53:125:01:ENST00000269305	4	HNSC	1	TP53	125 vs 163	ENST00000269305	4	7	0.2061	NA	0.9991	0.6416	0.3786
TP53:136:01:ENST00000269305	5	HNSC	1	TP53	136 vs 32	ENST00000269305	5	4	0.2063	0.2562	0.1482	0.2231	0.0959
TP53:157:01:ENST00000269305	5	OV	1	TP53	157 vs 234	ENST00000269305	5	5	0.2063	NA	0.9994	0.9603	0.7754
TP53:282:01:ENST00000269305	5	OV	1	TP53	282 vs 307	ENST00000269305	5	4	0.2063	5.4078	0.1498	0.3502	0.0902
THSD7B:1023:06:ENST00000272643	4	SKCM	6	THSD7B	1023 vs 305	ENST00000272643	4	5	0.2063	0.2645	0.229	0.3359	0.0858
TP53:187:01:ENST00000269305	10	OV	1	TP53	187 vs 192	ENST00000269305	10	5	0.2065	3.4597	0.2533	0.7055	0.4082
PTEN:157:01:ENST00000371953	4	UCEC	1	PTEN	157 vs 233	ENST00000371953	4	24	0.2067	4.2341	0.2464	0.9924	0.901
TP53:220:01:ENST00000269305	5	HNSC	1	TP53	220 vs 273	ENST00000269305	5	12	0.2072	0.2911	0.2518	0.5317	0.2782
TP53:245:01:ENST00000269305	8	OV	1	TP53	245 vs 248	ENST00000269305	8	21	0.2072	0.4702	0.2415	0.7521	0.4609
TP53:175:01:ENST00000269305	11	STAD	1	TP53	175 vs 282	ENST00000269305	11	5	0.2074	0.2845	0.2856	0.2292	0.0563
TP53:132:01:ENST00000269305	6	OV	1	TP53	132 vs 192	ENST00000269305	6	5	0.2078	3.7798	0.2386	0.3964	0.1596
TP53:248:01:ENST00000269305	8	BRCA	1	TP53	248 vs 342	ENST00000269305	8	9	0.2085	NA	0.9994	0.7232	0.4213
TP53:245:01:ENST00000269305	6	LGG	1	TP53	245 vs 280	ENST00000269305	6	4	0.2095	0.2605	0.2517	0.7376	0.4216
TP53:172:01:ENST00000269305	4	LUSC	1	TP53	172 vs 244	ENST00000269305	4	6	0.2095	0	0.9993	0.536	0.2861
APC:1408:01:ENST00000257430	4	COAD	1	APC	1408 vs 216	ENST00000257430	4	10	0.2098	3.4742	0.2164	0.4382	0.1604
CTNNB1:335:01:ENST00000349496	4	LIHC	1	CTNNB1	335 vs 45	ENST00000349496	4	16	0.2118	4.8202	0.1168	0.9332	0.7191
TP53:187:01:ENST00000269305	10	OV	1	TP53	187 vs 281	ENST00000269305	10	4	0.2118	3.5421	0.2474	0.79	0.5006
APC:1114:01:ENST00000257430	7	COAD	1	APC	1114 vs 943	ENST00000257430	7	4	0.2121	0	0.9994	0.2846	0.0863
TP53:193:01:ENST00000269305	7	LUSC	1	TP53	193 vs 225	ENST00000269305	7	4	0.2121	NA	0.9996	0.8714	0.5954
TP53:225:01:ENST00000269305	4	LUSC	1	TP53	225 vs 331	ENST00000269305	4	7	0.2121	0	0.9996	0.5842	0.2902
PTEN:136:01:ENST00000371953	7	UCEC	1	PTEN	136 vs 7	ENST00000371953	7	4	0.2121	NA	0.9994	0.5796	0.297
CDKN2A:80:01:ENST00000304494	19	HNSC	1	CDKN2A	80 vs 88	ENST00000304494	19	4	0.2134	3.0891	0.2871	0.7319	0.4485
TP53:192:01:ENST00000269305	5	OV	1	TP53	192 vs 282	ENST00000269305	5	5	0.2143	0.2628	0.2532	0.9985	0.9556
TP53:248:01:ENST00000269305	22	BLCA	1	TP53	248 vs 336	ENST00000269305	22	5	0.2146	2.2817	0.2798	0.9928	0.9046
TP53:234:01:ENST00000269305	9	LUSC	1	TP53	234 vs 280	ENST00000269305	9	4	0.2154	0.2913	0.1142	0.5386	0.3263
TP53:187:01:ENST00000269305	6	LUSC	1	TP53	187 vs 249	ENST00000269305	6	7	0.2156	4.0496	0.2289	0.9088	0.6661
PTEN:136:01:ENST00000371953	7	UCEC	1	PTEN	136 vs 233	ENST00000371953	7	22	0.2156	5.9655	0.145	0.904	0.6606
TP53:244:01:ENST00000269305	6	LUSC	1	TP53	244 vs 245	ENST00000269305	6	14	0.2162	3.4023	0.1445	0.5604	0.3032
PTEN:130:01:ENST00000371953	6	GBM	1	PTEN	130 vs 233	ENST00000371953	6	5	0.2165	4.6463	0.1861	0.9491	0.7435
TP53:237:01:ENST00000269305	4	LGG	1	TP53	237 vs 273	ENST00000269305	4	58	0.2166	0.5487	0.4491	0.1504	0.0202
TP53:244:01:ENST00000269305	5	OV	1	TP53	244 vs 331	ENST00000269305	5	7	0.2172	0.2896	0.2875	0.0974	0.0342
APC:1114:01:ENST00000257430	7	COAD	1	APC	1114 vs 1408	ENST00000257430	7	4	0.2182	0	0.9995	0.4794	0.1886
CDKN2A:153:01:ENST00000304494	9	HNSC	1	CDKN2A	153 vs 51	ENST00000304494	8	4	0.2182	0.121	0.0907	0.1152	0.0319
TP53:163:01:ENST00000269305	7	HNSC	1	TP53	163 vs 224	ENST00000269305	7	4	0.2182	0.1633	0.1412	0.6518	0.3852
PTEN:212:01:ENST00000371953	7	UCEC	1	PTEN	212 vs 27	ENST00000371953	7	4	0.2182	0	0.9996	0.8622	0.5751
PIK3CA:1047:01:ENST00000263967	41	UCEC	1	PIK3CA	1047 vs 111	ENST00000263967	41	4	0.2188	NA	0.9988	0.7303	0.4061
CDKN2A:114:06:ENST00000304494	6	SKCM	6	CDKN2A	114 vs 80	ENST00000304494	6	4	0.219	0	0.9994	0.9744	0.8213
PIK3CA:108:01:ENST00000263967	6	UCEC	1	PIK3CA	108 vs 38	ENST00000263967	6	8	0.2191	0.2566	0.2262	0.984	0.8577
TTK:192:01:ENST00000369798	5	UCEC	1	TTK	192 vs 854	ENST00000369798	5	8	0.2191	0	0.9994	0.4381	0.1971
GATA3:308:01:ENST00000346208	20	BRCA	1	GATA3	308 vs 335	ENST00000346208	20	12	0.2194	0.1989	0.1089	0.0128	0.0062
TP53:193:01:ENST00000269305	9	BRCA	1	TP53	193 vs 282	ENST00000269305	9	5	0.2198	0	0.9994	0.5193	0.2409
TP53:282:01:ENST00000269305	5	BRCA	1	TP53	282 vs 342	ENST00000269305	5	9	0.2198	NA	0.9994	0.7792	0.4699
TP53:175:01:ENST00000269305	15	OV	1	TP53	175 vs 195	ENST00000269305	15	12	0.2198	0.469	0.2137	0.9687	0.8017
TP53:187:01:ENST00000269305	10	OV	1	TP53	187 vs 275	ENST00000269305	10	4	0.2198	2.6875	0.2468	0.562	0.2618
FBXW7:465:01:ENST00000281708	10	COAD	1	FBXW7	465 vs 505	ENST00000281708	10	5	0.2204	0.2743	0.2673	0.4492	0.185
CTNNB1:32:01:ENST00000349496	17	LIHC	1	CTNNB1	32 vs 35	ENST00000349496	17	4	0.2206	NA	0.9989	0.9496	0.7433
TP53:273:01:ENST00000269305	12	HNSC	1	TP53	273 vs 32	ENST00000269305	12	4	0.2209	0.329	0.1339	0.3757	0.2426
TP53:154:01:ENST00000269305	7	LUSC	1	TP53	154 vs 248	ENST00000269305	7	10	0.221	0.3798	0.2499	0.4853	0.2332
TP53:157:01:ENST00000269305	14	LUSC	1	TP53	157 vs 307	ENST00000269305	14	5	0.2212	2.4414	0.2861	0.2917	0.1006
TP53:273:01:ENST00000269305	19	OV	1	TP53	273 vs 282	ENST00000269305	19	5	0.2212	0.2828	0.092	0.693	0.4242
TP53:163:01:ENST00000269305	7	LUSC	1	TP53	163 vs 248	ENST00000269305	7	10	0.222	0.2892	0.2586	0.9547	0.7599
TP53:175:01:ENST00000269305	15	OV	1	TP53	175 vs 179	ENST00000269305	15	5	0.222	3.2907	0.2792	0.9968	0.9364
TP53:173:01:ENST00000269305	4	BRCA	1	TP53	173 vs 245	ENST00000269305	4	5	0.2222	NA	0.9996	0.1634	0.0677
TP53:196:01:ENST00000269305	8	HNSC	1	TP53	196 vs 32	ENST00000269305	8	4	0.2222	0.3339	0.1903	0.9019	0.6648
TP53:278:01:ENST00000269305	4	HNSC	1	TP53	278 vs 298	ENST00000269305	4	5	0.2222	0.2822	0.2628	0.8465	0.5599
TP53:266:01:ENST00000269305	5	LUSC	1	TP53	266 vs 307	ENST00000269305	5	5	0.2222	5.5558	0.1673	0.2165	0.0873
TP53:193:01:ENST00000269305	5	OV	1	TP53	193 vs 306	ENST00000269305	5	4	0.2222	0.3708	0.2048	0.7788	0.3678
PTEN:268:01:ENST00000371953	8	UCEC	1	PTEN	268 vs 27	ENST00000371953	8	4	0.2222	0	0.9996	0.9401	0.722
TP53:245:01:ENST00000269305	4	UCEC	1	TP53	245 vs 273	ENST00000269305	4	21	0.2225	0	0.9989	0.8904	0.6205
TP53:213:01:ENST00000269305	10	COAD	1	TP53	213 vs 273	ENST00000269305	10	19	0.223	0.3091	0.286	0.9643	0.7882
TP53:151:01:ENST00000269305	5	HNSC	1	TP53	151 vs 248	ENST00000269305	5	13	0.2232	2.2624	0.2258	0.8922	0.6165
TP53:248:01:ENST00000269305	14	LGG	1	TP53	248 vs 282	ENST00000269305	14	7	0.2233	0.3719	0.2849	0.9401	0.7216
TP53:273:01:ENST00000269305	20	BRCA	1	TP53	273 vs 282	ENST00000269305	20	5	0.2238	0.2764	0.168	0.8058	0.5307
TP53:161:01:ENST00000269305	5	BLCA	1	TP53	161 vs 273	ENST00000269305	4	7	0.2242	2.9104	0.1956	0.9704	0.8104
TP53:241:01:ENST00000269305	6	OV	1	TP53	241 vs 244	ENST00000269305	6	5	0.2251	3.768	0.237	0.9722	0.8116
TP53:172:01:ENST00000269305	4	LUSC	1	TP53	172 vs 273	ENST00000269305	4	14	0.2275	0	0.9988	0.9978	0.9474
PIK3CA:345:01:ENST00000263967	16	BRCA	1	PIK3CA	345 vs 545	ENST00000263967	16	60	0.228	2.2187	0.2655	0.1151	0.0289
TP53:278:01:ENST00000269305	4	ESCA	1	TP53	278 vs 282	ENST00000269305	4	4	0.2286	0	0.9994	0.4514	0.2262
TP53:158:01:ENST00000269305	4	GBM	1	TP53	158 vs 238	ENST00000269305	4	4	0.2286	0.3229	0.1996	1	1
TP53:278:01:ENST00000269305	4	HNSC	1	TP53	278 vs 32	ENST00000269305	4	4	0.2286	0.2181	0.1966	0.9533	0.7542
TP53:32:01:ENST00000269305	4	HNSC	1	TP53	32 vs 331	ENST00000269305	4	4	0.2286	3.0781	0.2319	0.971	0.8096
EGFR:289:01:ENST00000275493	4	LGG	1	EGFR	289 vs 598	ENST00000275493	4	4	0.2286	0	0.9994	0.4744	0.239
ACVR1:206:01:ENST00000263640	4	UCEC	1	ACVR1	206 vs 375	ENST00000263640	4	4	0.2286	0	0.9996	0.392	0.1694
PTEN:16:01:ENST00000371953	4	UCEC	1	PTEN	16 vs 342	ENST00000371953	4	4	0.2286	0	0.9996	0.8645	0.5888
TP53:248:01:ENST00000269305	13	HNSC	1	TP53	248 vs 298	ENST00000269305	13	5	0.229	0.4322	0.2133	0.8187	0.5028
TP53:176:01:ENST00000269305	5	COAD	1	TP53	176 vs 248	ENST00000269305	5	19	0.2291	3.1933	0.2053	0.7443	0.4693
TP53:245:01:ENST00000269305	4	BLCA	1	TP53	245 vs 285	ENST00000269305	4	10	0.2298	0.2899	0.2769	0.8063	0.5092
TP53:193:01:ENST00000269305	4	UCEC	1	TP53	193 vs 273	ENST00000269305	4	21	0.2302	0.3498	0.339	0.6187	0.3068
PTEN:170:01:ENST00000371953	4	UCEC	1	PTEN	170 vs 92	ENST00000371953	4	7	0.2303	3.7064	0.292	0.9971	0.9395
TP53:163:01:ENST00000269305	9	OV	1	TP53	163 vs 176	ENST00000269305	9	8	0.2309	2.3605	0.2157	0.5447	0.2802
TP53:266:01:ENST00000269305	5	OV	1	TP53	266 vs 272	ENST00000269305	5	6	0.2338	2.7602	0.2303	0.3679	0.0959
TP53:248:01:ENST00000269305	14	ESCA	1	TP53	248 vs 278	ENST00000269305	14	4	0.2346	3.0308	0.2967	0.9573	0.7702
TP53:157:01:ENST00000269305	5	LUAD	1	TP53	157 vs 249	ENST00000269305	5	8	0.2347	0.3192	0.2347	0.1074	0.0312
TP53:154:01:ENST00000269305	7	LUSC	1	TP53	154 vs 175	ENST00000269305	7	8	0.2347	0.3655	0.2481	0.998	0.9701
TP53:159:01:ENST00000269305	4	LUSC	1	TP53	159 vs 278	ENST00000269305	4	10	0.2358	4.4721	0.3097	0.1887	0.1071
TP53:172:01:ENST00000269305	4	LUSC	1	TP53	172 vs 193	ENST00000269305	4	7	0.2364	0	0.9996	0.9651	0.7881
TP53:158:01:ENST00000269305	4	LGG	1	TP53	158 vs 248	ENST00000269305	4	14	0.2366	5.9791	0.2271	0.0445	0.0323
TP53:179:01:ENST00000269305	8	BRCA	1	TP53	179 vs 225	ENST00000269305	8	5	0.2378	1	NA	0.3003	0.1143
TP53:179:01:ENST00000269305	8	BRCA	1	TP53	179 vs 280	ENST00000269305	8	5	0.2378	1	NA	0.496	0.2352
TP53:179:01:ENST00000269305	8	BRCA	1	TP53	179 vs 331	ENST00000269305	8	5	0.2378	1	NA	0.0714	0.0191
TP53:176:01:ENST00000269305	8	OV	1	TP53	176 vs 234	ENST00000269305	8	5	0.2378	NA	0.9993	0.7424	0.4481
TP53:157:01:ENST00000269305	14	LUSC	1	TP53	157 vs 278	ENST00000269305	14	10	0.2379	2.4979	0.2762	0.9753	0.8232
APC:1489:01:ENST00000257430	4	COAD	1	APC	1489 vs 499	ENST00000257430	4	6	0.2381	0	0.9996	0.7577	0.4581
TP53:136:01:ENST00000269305	5	HNSC	1	TP53	136 vs 236	ENST00000269305	5	4	0.2381	NA	0.9993	0.9992	0.9678
TP53:151:01:ENST00000269305	5	HNSC	1	TP53	151 vs 283	ENST00000269305	5	4	0.2381	3.4958	0.2643	0.9364	0.7136
TP53:298:01:ENST00000269305	5	HNSC	1	TP53	298 vs 306	ENST00000269305	5	6	0.2381	0.3943	0.2104	0.6065	0.239
TP53:172:01:ENST00000269305	4	LUSC	1	TP53	172 vs 187	ENST00000269305	4	6	0.2381	0	0.9993	0.8466	0.5691
TP53:187:01:ENST00000269305	6	LUSC	1	TP53	187 vs 225	ENST00000269305	6	4	0.2381	NA	0.9993	0.9786	0.8355
TP53:234:01:ENST00000269305	5	OV	1	TP53	234 vs 261	ENST00000269305	5	4	0.2381	0	0.9993	0.4738	0.2035
ARID1A:1335:01:ENST00000324856	4	UCEC	1	ARID1A	1335 vs 551	ENST00000324856	4	5	0.2381	0	0.9996	0.3799	0.1697
ARID1A:1721:01:ENST00000324856	4	UCEC	1	ARID1A	1721 vs 551	ENST00000324856	4	5	0.2381	0	0.9996	0.3799	0.1697
ARID1A:551:01:ENST00000324856	5	UCEC	1	ARID1A	551 vs 693	ENST00000324856	5	4	0.2381	NA	0.9996	0.3799	0.1697
PIK3R1:457:01:ENST00000521381	5	UCEC	1	PIK3R1	457 vs 575	ENST00000521381	5	5	0.2381	0	0.9994	0.8443	0.5614
PIK3R1:464:01:ENST00000521381	5	UCEC	1	PIK3R1	464 vs 642	ENST00000521381	4	5	0.2381	NA	0.9994	0.5459	0.2432
TP53:179:01:ENST00000269305	9	LGG	1	TP53	179 vs 245	ENST00000269305	9	6	0.2382	5.7989	0.1725	0.0511	0.011
TP53:179:01:ENST00000269305	9	LUSC	1	TP53	179 vs 244	ENST00000269305	9	6	0.2382	0.2937	0.1922	0.4469	0.2183
TP53:248:01:ENST00000269305	10	LUSC	1	TP53	248 vs 266	ENST00000269305	10	5	0.2398	3.2116	0.2888	0.9579	0.7681
TP53:193:01:ENST00000269305	7	LUSC	1	TP53	193 vs 248	ENST00000269305	7	10	0.24	0.2716	0.2458	0.7042	0.4021
TP53:110:01:ENST00000269305	5	BRCA	1	TP53	110 vs 248	ENST00000269305	5	8	0.2409	0	0.9994	0.6409	0.3479
TP53:163:01:ENST00000269305	9	OV	1	TP53	163 vs 278	ENST00000269305	9	6	0.241	2.7371	0.2412	0.5598	0.2806
TP53:126:01:ENST00000269305	7	BRCA	1	TP53	126 vs 220	ENST00000269305	7	10	0.2417	4.7847	0.2027	0.5721	0.2982
PIK3CA:118:01:ENST00000263967	9	UCEC	1	PIK3CA	118 vs 344	ENST00000263967	9	7	0.2421	3.596	0.2691	0.7366	0.4331
TP53:196:01:ENST00000269305	5	LGG	1	TP53	196 vs 248	ENST00000269305	5	13	0.2423	4.8424	0.1992	0.5132	0.2175
TP53:179:01:ENST00000269305	9	LUSC	1	TP53	179 vs 273	ENST00000269305	9	14	0.2423	0.4495	0.2639	0.5601	0.2805
TP53:175:01:ENST00000269305	7	LGG	1	TP53	175 vs 193	ENST00000269305	7	4	0.2424	0	0.9996	0.768	0.4519
TP53:125:01:ENST00000269305	7	LUSC	1	TP53	125 vs 135	ENST00000269305	7	4	0.2424	0	0.9996	0.403	0.2115
TP53:187:01:ENST00000269305	6	LUSC	1	TP53	187 vs 307	ENST00000269305	6	5	0.2424	4.2919	0.2189	0.4299	0.1915
ARID1A:1276:01:ENST00000324856	6	UCEC	1	ARID1A	1276 vs 1989	ENST00000324856	6	5	0.2424	NA	0.9996	0.3105	0.1345
ARID1A:1989:01:ENST00000324856	5	UCEC	1	ARID1A	1989 vs 2141	ENST00000324856	5	6	0.2424	0	0.9996	0.9934	0.9086
TP53:132:01:ENST00000269305	6	OV	1	TP53	132 vs 175	ENST00000269305	6	15	0.2437	2.2473	0.2345	0.9402	0.7192
TP53:187:01:ENST00000269305	10	OV	1	TP53	187 vs 278	ENST00000269305	10	6	0.2438	2.2373	0.2695	0.8132	0.515
TP53:244:01:ENST00000269305	5	OV	1	TP53	244 vs 245	ENST00000269305	5	8	0.244	0.2828	0.2754	0.663	0.3633
PIK3CA:546:01:ENST00000263967	18	UCEC	1	PIK3CA	546 vs 93	ENST00000263967	18	8	0.2441	NA	0.9993	0.8548	0.5712
TP53:193:01:ENST00000269305	5	OV	1	TP53	193 vs 331	ENST00000269305	5	7	0.2449	0.1881	0.1717	0.0245	0.0034
TP53:194:01:ENST00000269305	4	BRCA	1	TP53	194 vs 273	ENST00000269305	4	20	0.2469	NA	0.9989	0.1324	0.0878
TP53:273:01:ENST00000269305	7	BLCA	1	TP53	273 vs 280	ENST00000269305	7	13	0.2473	2.3138	0.2416	0.6783	0.3559
TP53:157:01:ENST00000269305	4	BRCA	1	TP53	157 vs 176	ENST00000269305	4	6	0.2476	1	NA	0.4278	0.2074
TP53:176:01:ENST00000269305	6	BRCA	1	TP53	176 vs 195	ENST00000269305	6	4	0.2476	1	NA	0.3622	0.1712
TP53:176:01:ENST00000269305	6	BRCA	1	TP53	176 vs 238	ENST00000269305	6	4	0.2476	1	NA	0.1321	0.0639
APC:1397:01:ENST00000257430	6	COAD	1	APC	1397 vs 1489	ENST00000257430	6	4	0.2476	NA	0.9994	0.9099	0.673
APC:499:01:ENST00000257430	6	COAD	1	APC	499 vs 941	ENST00000257430	6	4	0.2476	1	NA	0.1418	0.0617
PTEN:130:01:ENST00000371953	6	GBM	1	PTEN	130 vs 173	ENST00000371953	6	4	0.2476	4.4797	0.1985	0.4537	0.1272
CIC:1512:01:ENST00000575354	6	LGG	1	CIC	1512 vs 201	ENST00000575354	6	4	0.2476	1	NA	0.6824	0.3675
TP53:158:01:ENST00000269305	4	LGG	1	TP53	158 vs 245	ENST00000269305	4	6	0.2476	NA	0.9996	0.173	0.0735
TP53:278:01:ENST00000269305	6	OV	1	TP53	278 vs 306	ENST00000269305	6	4	0.2476	0.3713	0.2558	0.5098	0.1513
TP53:278:01:ENST00000269305	6	OV	1	TP53	278 vs 307	ENST00000269305	6	4	0.2476	0.3713	0.2558	0.5098	0.1513
TP53:187:01:ENST00000269305	10	OV	1	TP53	187 vs 220	ENST00000269305	10	8	0.2481	2.1113	0.2555	0.9089	0.6617
TP53:175:01:ENST00000269305	15	OV	1	TP53	175 vs 234	ENST00000269305	15	5	0.2494	NA	0.9988	0.9039	0.6598
TP53:154:01:ENST00000269305	7	LUSC	1	TP53	154 vs 234	ENST00000269305	7	9	0.2512	0.4108	0.2686	0.2051	0.0651
TP53:179:01:ENST00000269305	9	LGG	1	TP53	179 vs 280	ENST00000269305	9	4	0.2517	NA	0.9994	0.1571	0.0397
TP53:193:01:ENST00000269305	7	LUSC	1	TP53	193 vs 244	ENST00000269305	7	6	0.2517	0.2595	0.2624	0.9797	0.8397
APC:1114:01:ENST00000257430	7	COAD	1	APC	1114 vs 302	ENST00000257430	7	5	0.2525	0	0.9994	0.9622	0.7796
TP53:132:01:ENST00000269305	5	BRCA	1	TP53	132 vs 194	ENST00000269305	5	4	0.254	0	0.9997	0.0729	0.0136
PIK3CA:1047:01:ENST00000263967	4	ESCA	1	PIK3CA	1047 vs 545	ENST00000263967	4	5	0.254	0	0.9994	0.392	0.1694
TP53:158:01:ENST00000269305	5	LUAD	1	TP53	158 vs 159	ENST00000269305	5	4	0.254	0.3644	0.2472	0.6873	0.2901
TP53:225:01:ENST00000269305	4	LUSC	1	TP53	225 vs 266	ENST00000269305	4	5	0.254	0	0.9994	0.9923	0.9009
TP53:237:01:ENST00000269305	5	OV	1	TP53	237 vs 261	ENST00000269305	5	4	0.254	2.8451	0.239	0.9667	0.7963
PIK3CA:1047:01:ENST00000263967	5	UCS	1	PIK3CA	1047 vs 545	ENST00000263967	5	4	0.254	2.464	0.3027	0.3679	0.1383
TP53:187:01:ENST00000269305	4	ESCA	1	TP53	187 vs 273	ENST00000269305	4	9	0.2545	0	0.9993	0.9858	0.8663
PPP2R1A:179:01:ENST00000322088	26	UCEC	1	PPP2R1A	179 vs 183	ENST00000322088	26	8	0.2561	3.0512	0.2999	0.968	0.7973
TP53:179:01:ENST00000269305	8	BRCA	1	TP53	179 vs 282	ENST00000269305	8	5	0.2564	0	0.9994	0.1686	0.0507
TP53:196:01:ENST00000269305	8	BRCA	1	TP53	196 vs 282	ENST00000269305	8	5	0.2564	0	0.9994	0.5964	0.3326
TP53:176:01:ENST00000269305	8	OV	1	TP53	176 vs 238	ENST00000269305	8	5	0.2564	0.1919	0.1016	0.1855	0.0786
TP53:163:01:ENST00000269305	9	OV	1	TP53	163 vs 193	ENST00000269305	9	5	0.2567	2.371	0.2637	0.2231	0.08
TP53:159:01:ENST00000269305	4	BLCA	1	TP53	159 vs 192	ENST00000269305	4	4	0.2571	NA	0.9994	0.8766	0.6131
PIK3CA:542:01:ENST00000263967	10	COAD	1	PIK3CA	542 vs 88	ENST00000263967	10	5	0.2571	0.2981	0.3972	0.9658	0.7941
TP53:176:01:ENST00000269305	4	ESCA	1	TP53	176 vs 213	ENST00000269305	4	4	0.2571	0.248	0.231	0.9411	0.7313
EGFR:252:01:ENST00000275493	4	GBM	1	EGFR	252 vs 774	ENST00000275493	4	4	0.2571	0.2549	0.2514	0.4724	0.1758
PTEN:130:01:ENST00000371953	6	GBM	1	PTEN	130 vs 132	ENST00000371953	6	4	0.2571	4.4797	0.1985	0.4537	0.1272
TP53:224:01:ENST00000269305	4	HNSC	1	TP53	224 vs 236	ENST00000269305	4	4	0.2571	NA	0.9994	0.9999	0.9912
TP53:283:01:ENST00000269305	4	HNSC	1	TP53	283 vs 32	ENST00000269305	4	4	0.2571	0.2321	0.2085	0.8091	0.535
TP53:135:01:ENST00000269305	4	LUSC	1	TP53	135 vs 280	ENST00000269305	4	4	0.2571	0.2557	0.2415	0.9625	0.7797
TP53:271:01:ENST00000269305	4	LUSC	1	TP53	271 vs 280	ENST00000269305	4	4	0.2571	0.2321	0.2085	0.8091	0.535
TP53:179:01:ENST00000269305	4	PAAD	1	TP53	179 vs 245	ENST00000269305	4	4	0.2571	NA	0.9994	0.346	0.1703
CDK4:22:06:ENST00000257904	4	SKCM	6	CDK4	22 vs 24	ENST00000257904	4	4	0.2571	0.2628	0.2532	0.321	0.0673
PIK3CA:345:01:ENST00000263967	16	BRCA	1	PIK3CA	345 vs 542	ENST00000263967	16	38	0.2574	2.2286	0.2616	0.9323	0.7116
TP53:163:01:ENST00000269305	7	HNSC	1	TP53	163 vs 220	ENST00000269305	7	5	0.2576	NA	0.9993	0.8854	0.6244
TP53:163:01:ENST00000269305	9	OV	1	TP53	163 vs 273	ENST00000269305	9	19	0.2594	2.1685	0.1775	0.3374	0.1726
PTEN:130:01:ENST00000371953	66	UCEC	1	PTEN	130 vs 27	ENST00000371953	63	4	0.2596	0.2734	0.2306	0.7342	0.4657
TP53:175:01:ENST00000269305	15	OV	1	TP53	175 vs 331	ENST00000269305	15	7	0.2598	0.3459	0.176	0.6856	0.4038
TP53:224:01:ENST00000269305	4	HNSC	1	TP53	224 vs 245	ENST00000269305	4	9	0.2601	3.4664	0.1803	0.1647	0.0923
TP53:220:01:ENST00000269305	5	LUSC	1	TP53	220 vs 273	ENST00000269305	5	14	0.2604	2.0573	0.2747	0.7751	0.4454
TP53:173:01:ENST00000269305	4	BRCA	1	TP53	173 vs 175	ENST00000269305	4	19	0.2606	9.1652	0.1206	0.6497	0.3882
TP53:125:01:ENST00000269305	4	LGG	1	TP53	125 vs 282	ENST00000269305	4	7	0.2606	2.5362	0.3132	0.9779	0.8293
TP53:125:01:ENST00000269305	7	LUSC	1	TP53	125 vs 298	ENST00000269305	7	4	0.2606	0.2151	0.2121	0.5569	0.2457
TP53:179:01:ENST00000269305	9	LGG	1	TP53	179 vs 248	ENST00000269305	9	14	0.2607	6.0699	0.1683	0.0416	0.0186
TP53:236:01:ENST00000269305	4	HNSC	1	TP53	236 vs 282	ENST00000269305	4	8	0.2626	0	0.9993	0.9475	0.7449
TP53:175:01:ENST00000269305	19	BRCA	1	TP53	175 vs 225	ENST00000269305	19	5	0.2631	NA	0.9994	0.9483	0.7405
TP53:241:01:ENST00000269305	5	BLCA	1	TP53	241 vs 248	ENST00000269305	5	22	0.2633	0.535	0.3378	0.5416	0.2463
PIK3R1:575:01:ENST00000521381	5	UCEC	1	PIK3R1	575 vs 582	ENST00000521381	5	12	0.2634	3.8944	0.2677	0.9063	0.6511
TP53:205:01:ENST00000269305	4	UCEC	1	TP53	205 vs 248	ENST00000269305	4	15	0.2637	2.2025	0.4074	0.194	0.0416
TP53:175:01:ENST00000269305	12	HNSC	1	TP53	175 vs 245	ENST00000269305	12	9	0.2638	2.1178	0.278	0.5317	0.2391
TP53:245:01:ENST00000269305	14	LUSC	1	TP53	245 vs 248	ENST00000269305	14	10	0.2639	0.475	0.2489	0.6978	0.409
TP53:280:01:ENST00000269305	5	HNSC	1	TP53	280 vs 306	ENST00000269305	5	6	0.2641	0.3613	0.2371	0.7408	0.3323
CDKN2A:108:01:ENST00000304494	6	LUSC	1	CDKN2A	108 vs 110	ENST00000304494	6	5	0.2641	2.4291	0.2791	0.3679	0.0959
PIK3CA:345:01:ENST00000263967	16	BRCA	1	PIK3CA	345 vs 726	ENST00000263967	16	9	0.2642	NA	0.9989	0.307	0.1391
APC:213:01:ENST00000257430	12	COAD	1	APC	213 vs 943	ENST00000257430	12	4	0.2648	0.2364	0.25	0.5174	0.2241
PIK3R1:464:01:ENST00000521381	5	UCEC	1	PIK3R1	464 vs 582	ENST00000521381	4	12	0.2648	3.8005	0.2847	0.1921	0.0422
TP53:249:01:ENST00000269305	7	LUSC	1	TP53	249 vs 266	ENST00000269305	7	5	0.2652	0.2775	0.2955	0.8137	0.531
APC:213:01:ENST00000257430	12	COAD	1	APC	213 vs 876	ENST00000257430	12	12	0.2662	0.2562	0.2291	0.4762	0.2225
TP53:187:01:ENST00000269305	6	LUSC	1	TP53	187 vs 244	ENST00000269305	6	6	0.2662	0.2391	0.2302	0.9792	0.8368
TP53:179:01:ENST00000269305	4	GBM	1	TP53	179 vs 282	ENST00000269305	4	6	0.2667	0.3761	0.258	0.971	0.8096
TP53:306:01:ENST00000269305	6	HNSC	1	TP53	306 vs 307	ENST00000269305	6	4	0.2667	2.4169	0.2984	0.6703	0.2783
FBXW7:479:01:ENST00000281708	6	UCEC	1	FBXW7	479 vs 545	ENST00000281708	6	4	0.2667	0	0.9994	0.7699	0.4889
PTEN:27:01:ENST00000371953	4	UCEC	1	PTEN	27 vs 290	ENST00000371953	4	6	0.2667	NA	0.9996	0.8664	0.5993
TP53:176:01:ENST00000269305	6	BRCA	1	TP53	176 vs 193	ENST00000269305	6	9	0.2669	1	NA	0.2503	0.0977
APC:1378:01:ENST00000257430	6	COAD	1	APC	1378 vs 213	ENST00000257430	6	12	0.2669	4	0.2577	0.9998	0.9838
APC:1450:01:ENST00000257430	19	COAD	1	APC	1450 vs 213	ENST00000257430	19	11	0.2673	3.1476	0.2955	0.9906	0.8907
TP53:193:01:ENST00000269305	5	LUAD	1	TP53	193 vs 249	ENST00000269305	5	8	0.2673	0	0.9994	0.5112	0.2556
TP53:193:01:ENST00000269305	7	LUSC	1	TP53	193 vs 273	ENST00000269305	7	14	0.2676	0.321	0.2947	0.5683	0.2984
CTCF:204:01:ENST00000264010	27	UCEC	1	CTCF	204 vs 377	ENST00000264010	27	9	0.268	0.3712	0.2833	0.8684	0.6034
NFE2L2:29:01:ENST00000397062	14	LUSC	1	NFE2L2	29 vs 79	ENST00000397062	14	9	0.2691	2.3738	0.2794	0.1972	0.0772
TP53:175:01:ENST00000269305	7	LGG	1	TP53	175 vs 273	ENST00000269305	7	59	0.2693	0	0.9981	0.9848	0.8632
PIK3CA:1044:01:ENST00000263967	6	UCEC	1	PIK3CA	1044 vs 545	ENST00000263967	6	26	0.2693	3.1927	0.344	0.8738	0.6168
TP53:245:01:ENST00000269305	4	PAAD	1	TP53	245 vs 248	ENST00000269305	4	10	0.2697	0.4421	0.3112	0.8513	0.5595
TP53:132:01:ENST00000269305	4	BLCA	1	TP53	132 vs 241	ENST00000269305	4	5	0.2698	NA	0.9991	0.0579	0.0185
TP53:245:01:ENST00000269305	4	BLCA	1	TP53	245 vs 336	ENST00000269305	4	5	0.2698	0	0.9994	0.1846	0.0766
TP53:194:01:ENST00000269305	4	BRCA	1	TP53	194 vs 245	ENST00000269305	4	5	0.2698	NA	0.9996	0.0729	0.0136
TP53:294:01:ENST00000269305	4	HNSC	1	TP53	294 vs 298	ENST00000269305	4	5	0.2698	0.2747	0.2513	0.266	0.0514
TP53:193:01:ENST00000269305	5	OV	1	TP53	193 vs 261	ENST00000269305	5	4	0.2698	0.2966	0.1914	0.5353	0.2028
TP53:266:01:ENST00000269305	5	OV	1	TP53	266 vs 342	ENST00000269305	5	4	0.2698	2.6875	0.2429	1	1
TP53:275:01:ENST00000269305	4	OV	1	TP53	275 vs 282	ENST00000269305	4	5	0.2698	0.2304	0.216	0.4076	0.1095
PTEN:127:01:ENST00000371953	6	UCEC	1	PTEN	127 vs 7	ENST00000371953	5	4	0.2698	NA	0.9996	0.7685	0.4699
TP53:248:01:ENST00000269305	10	LUSC	1	TP53	248 vs 331	ENST00000269305	10	7	0.2703	3.4861	0.2674	0.6287	0.3289
TP53:195:01:ENST00000269305	12	OV	1	TP53	195 vs 282	ENST00000269305	12	5	0.2708	0.368	0.2295	0.9852	0.8616
APC:1408:01:ENST00000257430	4	COAD	1	APC	1408 vs 213	ENST00000257430	4	12	0.2714	6.2465	0.1353	0.4196	0.1427
PIK3CA:1047:01:ENST00000263967	7	BLCA	1	PIK3CA	1047 vs 545	ENST00000263967	7	28	0.2727	0.5351	0.3225	0.9985	0.9569
TP53:271:01:ENST00000269305	4	BLCA	1	TP53	271 vs 331	ENST00000269305	4	7	0.2727	2.8641	0.2508	0.2752	0.0423
TP53:196:01:ENST00000269305	8	HNSC	1	TP53	196 vs 298	ENST00000269305	8	5	0.2735	0.4249	0.2692	0.6899	0.3667
TP53:179:01:ENST00000269305	9	LGG	1	TP53	179 vs 275	ENST00000269305	9	4	0.2741	NA	0.9994	0.5287	0.2407
TP53:125:01:ENST00000269305	4	HNSC	1	TP53	125 vs 179	ENST00000269305	4	8	0.2747	2.8284	0.3022	0.6416	0.3786
TP53:126:01:ENST00000269305	6	LUSC	1	TP53	126 vs 298	ENST00000269305	6	4	0.2762	2.4036	0.3176	0.7713	0.4692
TP53:220:01:ENST00000269305	8	OV	1	TP53	220 vs 248	ENST00000269305	8	21	0.2765	0.5914	0.3274	0.909	0.6576
APC:302:01:ENST00000257430	5	COAD	1	APC	302 vs 499	ENST00000257430	5	6	0.2771	NA	0.9994	0.9996	0.9768
TP53:110:01:ENST00000269305	5	HNSC	1	TP53	110 vs 306	ENST00000269305	5	6	0.2771	0.4069	0.291	0.9949	0.9192
TP53:237:01:ENST00000269305	5	OV	1	TP53	237 vs 241	ENST00000269305	5	6	0.2771	2.9097	0.2251	0.9862	0.8682
PIK3CA:344:01:ENST00000263967	7	UCEC	1	PIK3CA	344 vs 420	ENST00000263967	7	7	0.2774	NA	NA	0.0612	0.0177
TP53:245:01:ENST00000269305	14	LUSC	1	TP53	245 vs 273	ENST00000269305	14	14	0.2777	0.4998	0.2616	0.493	0.241
TP53:280:01:ENST00000269305	5	BRCA	1	TP53	280 vs 331	ENST00000269305	5	5	0.2778	NA	0.9996	0.6096	0.3272
TP53:126:01:ENST00000269305	6	LUSC	1	TP53	126 vs 175	ENST00000269305	6	8	0.2784	2.2262	0.2702	0.9857	0.8925
TP53:175:01:ENST00000269305	8	LUSC	1	TP53	175 vs 271	ENST00000269305	8	4	0.2788	2.9672	0.3336	0.993	0.9277
EGFR:222:01:ENST00000275493	5	GBM	1	EGFR	222 vs 598	ENST00000275493	5	13	0.2803	1.9329	0.2503	0.8669	0.4783
TP53:105:01:ENST00000269305	5	LUSC	1	TP53	105 vs 249	ENST00000269305	5	7	0.2803	3.4323	0.2864	0.6508	0.3441
APC:1114:01:ENST00000257430	7	COAD	1	APC	1114 vs 935	ENST00000257430	7	9	0.2804	0	0.9993	0.7419	0.445
TP53:132:01:ENST00000269305	4	BLCA	1	TP53	132 vs 280	ENST00000269305	4	13	0.2807	3.3166	0.2319	0.4603	0.2603
TP53:175:01:ENST00000269305	19	BRCA	1	TP53	175 vs 278	ENST00000269305	19	4	0.2807	NA	0.9994	0.8077	0.4973
TP53:176:01:ENST00000269305	8	OV	1	TP53	176 vs 237	ENST00000269305	8	5	0.2813	0.4558	0.2704	0.998	0.9498
TP53:273:01:ENST00000269305	9	READ	1	TP53	273 vs 282	ENST00000269305	9	8	0.2819	0.3218	0.3335	0.9996	0.9764
TP53:163:01:ENST00000269305	7	HNSC	1	TP53	163 vs 248	ENST00000269305	7	13	0.2835	0.4202	0.2939	0.6069	0.3086
PTEN:233:01:ENST00000371953	24	UCEC	1	PTEN	233 vs 27	ENST00000371953	24	4	0.2842	0.2709	0.2864	0.7323	0.46
TP53:249:01:ENST00000269305	8	LUAD	1	TP53	249 vs 331	ENST00000269305	8	5	0.2844	3.3546	0.3063	0.8757	0.6034
TP53:163:01:ENST00000269305	7	HNSC	1	TP53	163 vs 236	ENST00000269305	7	4	0.2848	NA	0.9994	0.9011	0.653
TP53:175:01:ENST00000269305	12	HNSC	1	TP53	175 vs 179	ENST00000269305	12	8	0.2856	2.3164	0.2967	0.373	0.1675
TP53:110:01:ENST00000269305	5	BRCA	1	TP53	110 vs 173	ENST00000269305	5	4	0.2857	0	0.9996	0.3634	0.1667
TP53:110:01:ENST00000269305	5	BRCA	1	TP53	110 vs 194	ENST00000269305	5	4	0.2857	0	0.9996	0.4198	0.1857
TP53:132:01:ENST00000269305	5	BRCA	1	TP53	132 vs 173	ENST00000269305	5	4	0.2857	0	0.9996	0.1634	0.0677
TP53:194:01:ENST00000269305	4	BRCA	1	TP53	194 vs 285	ENST00000269305	4	4	0.2857	NA	0.9994	0.1217	0.0216
APC:1429:01:ENST00000257430	4	COAD	1	APC	1429 vs 232	ENST00000257430	4	5	0.2857	NA	0.9996	0.5739	0.2833
APC:232:01:ENST00000257430	5	COAD	1	APC	232 vs 554	ENST00000257430	5	4	0.2857	0	0.9996	0.1144	0.0338
TP53:283:01:ENST00000269305	4	HNSC	1	TP53	283 vs 298	ENST00000269305	4	5	0.2857	0.2756	0.2495	0.9625	0.7797
TP53:125:01:ENST00000269305	4	LGG	1	TP53	125 vs 193	ENST00000269305	4	4	0.2857	3.1365	0.325	0.926	0.6913
TP53:125:01:ENST00000269305	4	LGG	1	TP53	125 vs 196	ENST00000269305	4	5	0.2857	2.9239	0.2573	0.9706	0.805
CTNNB1:335:01:ENST00000349496	4	LIHC	1	CTNNB1	335 vs 35	ENST00000349496	4	4	0.2857	NA	0.9994	0.6962	0.3987
TP53:105:01:ENST00000269305	5	LUSC	1	TP53	105 vs 172	ENST00000269305	5	4	0.2857	NA	0.9994	0.1806	0.0632
TP53:157:01:ENST00000269305	5	OV	1	TP53	157 vs 179	ENST00000269305	5	5	0.2857	3.5129	0.3093	0.9947	0.9179
TP53:157:01:ENST00000269305	5	OV	1	TP53	157 vs 244	ENST00000269305	5	5	0.2857	3.5129	0.3093	0.7394	0.4469
PIK3R1:376:01:ENST00000521381	4	UCEC	1	PIK3R1	376 vs 457	ENST00000521381	4	5	0.2857	NA	0.9996	0.4246	0.1857
PIK3R1:464:01:ENST00000521381	5	UCEC	1	PIK3R1	464 vs 577	ENST00000521381	4	5	0.2857	NA	0.9994	0.4407	0.1754
PTEN:27:01:ENST00000371953	4	UCEC	1	PTEN	27 vs 343	ENST00000371953	4	5	0.2857	NA	0.9996	0.8192	0.5339
TP53:175:01:ENST00000269305	15	OV	1	TP53	175 vs 261	ENST00000269305	15	4	0.2874	0.4654	0.3007	0.8456	0.539
TP53:179:01:ENST00000269305	8	HNSC	1	TP53	179 vs 280	ENST00000269305	8	5	0.2875	0.3472	0.2489	0.9871	0.8713
TP53:273:01:ENST00000269305	20	BRCA	1	TP53	273 vs 331	ENST00000269305	20	5	0.2879	NA	0.999	0.9725	0.8111
TP53:163:01:ENST00000269305	9	OV	1	TP53	163 vs 245	ENST00000269305	9	8	0.288	2.1917	0.2954	0.9837	0.8562
TP53:157:01:ENST00000269305	14	LUSC	1	TP53	157 vs 172	ENST00000269305	14	4	0.2882	NA	0.9989	0.811	0.5297
INPPL1:1156:01:ENST00000298229	15	UCEC	1	INPPL1	1156 vs 976	ENST00000298229	15	8	0.2882	0.3657	0.3186	0.4559	0.2326
TP53:176:01:ENST00000269305	6	HNSC	1	TP53	176 vs 298	ENST00000269305	6	5	0.29	0.3807	0.2661	0.9968	0.9355
TP53:175:01:ENST00000269305	7	LGG	1	TP53	175 vs 196	ENST00000269305	7	5	0.2904	0	0.9994	0.4156	0.1693
TP53:157:01:ENST00000269305	14	LUSC	1	TP53	157 vs 234	ENST00000269305	14	9	0.2911	0.5484	0.3074	0.1664	0.0396
PIK3CA:420:01:ENST00000263967	7	UCEC	1	PIK3CA	420 vs 88	ENST00000263967	7	17	0.2912	0	0.9994	0.5748	0.3053
TP53:163:01:ENST00000269305	7	HNSC	1	TP53	163 vs 337	ENST00000269305	7	5	0.2929	0.2065	0.1992	0.6436	0.3636
PIK3CA:118:01:ENST00000263967	9	UCEC	1	PIK3CA	118 vs 546	ENST00000263967	9	18	0.2931	2.3671	0.2926	0.9482	0.7469
TP53:126:01:ENST00000269305	7	BRCA	1	TP53	126 vs 213	ENST00000269305	7	6	0.2937	NA	0.9996	0.9946	0.9367
TP53:157:01:ENST00000269305	5	OV	1	TP53	157 vs 266	ENST00000269305	5	5	0.2937	0.4303	0.3171	0.4794	0.1383
CTNNB1:33:01:ENST00000349496	12	LIHC	1	CTNNB1	33 vs 35	ENST00000349496	12	4	0.2945	NA	0.9989	0.8829	0.627
PIK3CA:1021:01:ENST00000263967	4	UCEC	1	PIK3CA	1021 vs 546	ENST00000263967	4	17	0.2947	0	0.9991	0.9577	0.7719
APC:1408:01:ENST00000257430	4	COAD	1	APC	1408 vs 1414	ENST00000257430	4	6	0.2952	4.2154	0.2444	0.7213	0.3923
TP53:248:01:ENST00000269305	21	OV	1	TP53	248 vs 266	ENST00000269305	21	5	0.2964	0.5734	0.3043	0.4322	0.0855
APC:1408:01:ENST00000257430	4	COAD	1	APC	1408 vs 935	ENST00000257430	4	9	0.2965	2.3843	0.3462	0.6759	0.344
TP53:248:01:ENST00000269305	22	BLCA	1	TP53	248 vs 331	ENST00000269305	22	7	0.2978	2.1404	0.3169	0.6751	0.3895
TP53:157:01:ENST00000269305	4	HNSC	1	TP53	157 vs 248	ENST00000269305	4	13	0.2983	0.3558	0.3466	0.6363	0.3234
TP53:220:01:ENST00000269305	8	OV	1	TP53	220 vs 238	ENST00000269305	8	5	0.2984	0.1859	0.1739	0.5996	0.3308
TP53:176:01:ENST00000269305	5	LUSC	1	TP53	176 vs 244	ENST00000269305	5	6	0.2987	2.2414	0.2959	0.6326	0.2063
TP53:175:01:ENST00000269305	11	STAD	1	TP53	175 vs 273	ENST00000269305	11	11	0.2987	0.3115	0.2956	0.02	0.0051
PTEN:233:01:ENST00000371953	24	UCEC	1	PTEN	233 vs 7	ENST00000371953	24	4	0.2989	NA	0.9994	0.7012	0.3803
TP53:163:01:ENST00000269305	9	OV	1	TP53	163 vs 281	ENST00000269305	9	4	0.2993	2.8702	0.3395	0.9783	0.8343
TP53:179:01:ENST00000269305	9	LGG	1	TP53	179 vs 213	ENST00000269305	9	5	0.3007	NA	0.9994	0.9552	0.7644
TP53:132:01:ENST00000269305	4	BLCA	1	TP53	132 vs 336	ENST00000269305	4	5	0.3016	4.4693	0.2333	0.3876	0.1926
TP53:241:01:ENST00000269305	5	BLCA	1	TP53	241 vs 245	ENST00000269305	5	4	0.3016	3.4255	0.2889	0.7903	0.4797
TP53:157:01:ENST00000269305	4	BRCA	1	TP53	157 vs 225	ENST00000269305	4	5	0.3016	1	NA	0.8683	0.5953
TP53:157:01:ENST00000269305	4	BRCA	1	TP53	157 vs 280	ENST00000269305	4	5	0.3016	1	NA	0.9999	0.9916
TP53:157:01:ENST00000269305	4	BRCA	1	TP53	157 vs 331	ENST00000269305	4	5	0.3016	1	NA	0.6096	0.3272
TP53:195:01:ENST00000269305	4	BRCA	1	TP53	195 vs 225	ENST00000269305	4	5	0.3016	1	NA	0.7151	0.4167
TP53:195:01:ENST00000269305	4	BRCA	1	TP53	195 vs 280	ENST00000269305	4	5	0.3016	1	NA	0.9911	0.8964
TP53:195:01:ENST00000269305	4	BRCA	1	TP53	195 vs 331	ENST00000269305	4	5	0.3016	1	NA	0.6551	0.3638
TP53:225:01:ENST00000269305	5	BRCA	1	TP53	225 vs 238	ENST00000269305	5	4	0.3016	1	NA	0.5249	0.2671
TP53:225:01:ENST00000269305	5	BRCA	1	TP53	225 vs 278	ENST00000269305	5	4	0.3016	1	NA	0.9905	0.8899
TP53:238:01:ENST00000269305	4	BRCA	1	TP53	238 vs 280	ENST00000269305	4	5	0.3016	1	NA	0.8324	0.5491
TP53:238:01:ENST00000269305	4	BRCA	1	TP53	238 vs 331	ENST00000269305	4	5	0.3016	1	NA	0.1693	0.0724
TP53:278:01:ENST00000269305	4	BRCA	1	TP53	278 vs 331	ENST00000269305	4	5	0.3016	1	NA	0.933	0.7107
PIK3CA:542:01:ENST00000263967	4	LUAD	1	PIK3CA	542 vs 545	ENST00000263967	4	5	0.3016	4.4693	0.2333	0.5108	0.2605
TP53:192:01:ENST00000269305	5	OV	1	TP53	192 vs 237	ENST00000269305	5	5	0.3016	0.3232	0.3149	0.7319	0.4161
TP53:192:01:ENST00000269305	5	OV	1	TP53	192 vs 307	ENST00000269305	5	4	0.3016	0.3232	0.3149	0.2474	0.0469
TP53:237:01:ENST00000269305	5	OV	1	TP53	237 vs 307	ENST00000269305	5	4	0.3016	2.8451	0.239	0.6703	0.2783
TP53:163:01:ENST00000269305	7	LUSC	1	TP53	163 vs 244	ENST00000269305	7	6	0.3019	0.3046	0.3118	0.69	0.3939
TP53:273:01:ENST00000269305	19	OV	1	TP53	273 vs 307	ENST00000269305	19	4	0.3024	0.5357	0.3005	0.5559	0.1469
TP53:225:01:ENST00000269305	5	BRCA	1	TP53	225 vs 248	ENST00000269305	5	8	0.303	0	0.9994	0.9995	0.9746
TP53:125:01:ENST00000269305	7	LUSC	1	TP53	125 vs 214	ENST00000269305	7	4	0.303	0	0.9994	0.7079	0.4208
TP53:135:01:ENST00000269305	4	LUSC	1	TP53	135 vs 249	ENST00000269305	4	7	0.303	2.6458	0.4923	0.3259	0.1651
TP53:220:01:ENST00000269305	10	BRCA	1	TP53	220 vs 285	ENST00000269305	10	4	0.3037	0.289	0.315	0.8722	0.5918
TP53:175:01:ENST00000269305	12	HNSC	1	TP53	175 vs 32	ENST00000269305	12	4	0.3044	0.4394	0.25	0.4782	0.2931
PIK3CA:1043:01:ENST00000263967	4	LGG	1	PIK3CA	1043 vs 1047	ENST00000263967	4	6	0.3048	0	0.9994	0.8145	0.5231
TP53:261:01:ENST00000269305	4	OV	1	TP53	261 vs 278	ENST00000269305	4	6	0.3048	2.7111	0.2819	0.9716	0.8082
PIK3CA:545:01:ENST00000263967	60	BRCA	1	PIK3CA	545 vs 546	ENST00000263967	60	11	0.3054	2.2124	0.4732	0.7103	0.3933
TP53:176:01:ENST00000269305	6	BRCA	1	TP53	176 vs 179	ENST00000269305	6	8	0.3064	1	NA	0.066	0.021
TP53:154:01:ENST00000269305	7	LUSC	1	TP53	154 vs 278	ENST00000269305	7	10	0.3066	3.3535	0.325	0.9758	0.8313
TP53:173:01:ENST00000269305	4	BRCA	1	TP53	173 vs 273	ENST00000269305	4	20	0.307	11.4891	0.0844	0.1686	0.1086
TP53:220:01:ENST00000269305	10	BRCA	1	TP53	220 vs 282	ENST00000269305	10	5	0.307	0.2228	0.2207	0.446	0.2415
APC:1414:01:ENST00000257430	7	COAD	1	APC	1414 vs 302	ENST00000257430	6	5	0.3074	0.2689	0.2914	0.6135	0.3406
TP53:234:01:ENST00000269305	5	OV	1	TP53	234 vs 278	ENST00000269305	5	6	0.3074	0	0.9994	0.7712	0.4733
TP53:195:01:ENST00000269305	12	OV	1	TP53	195 vs 237	ENST00000269305	12	5	0.3077	0.4937	0.3241	0.6417	0.3123
FBXW7:423:01:ENST00000281708	8	UCEC	1	FBXW7	423 vs 479	ENST00000281708	8	6	0.3077	NA	0.9994	0.9861	0.8668
TP53:192:01:ENST00000269305	4	BLCA	1	TP53	192 vs 273	ENST00000269305	4	7	0.3091	0.3278	0.3214	0.9278	0.6974
PTEN:130:01:ENST00000371953	66	UCEC	1	PTEN	130 vs 70	ENST00000371953	63	4	0.3101	0.3012	0.2686	0.9619	0.7858
PIK3CA:1047:01:ENST00000263967	129	BRCA	1	PIK3CA	1047 vs 542	ENST00000263967	129	38	0.3106	1.6849	0.3538	0.4411	0.1919
TP53:175:01:ENST00000269305	12	READ	1	TP53	175 vs 273	ENST00000269305	12	9	0.311	3	0.3414	0.8974	0.6413
PTEN:173:01:ENST00000371953	7	UCEC	1	PTEN	173 vs 268	ENST00000371953	7	8	0.3111	NA	0.9996	0.8858	0.6225
TP53:220:01:ENST00000269305	5	GBM	1	TP53	220 vs 273	ENST00000269305	5	6	0.3117	3.0738	0.3323	0.9095	0.6593
TP53:266:01:ENST00000269305	4	COAD	1	TP53	266 vs 282	ENST00000269305	4	11	0.3121	0	0.9994	0.9325	0.7066
PPP2R1A:179:01:ENST00000322088	26	UCEC	1	PPP2R1A	179 vs 256	ENST00000322088	26	10	0.3131	2.1004	0.3513	0.8578	0.5744
TP53:225:01:ENST00000269305	4	LUSC	1	TP53	225 vs 234	ENST00000269305	4	9	0.3133	0.3275	0.3049	0.3329	0.1413
TP53:187:01:ENST00000269305	10	OV	1	TP53	187 vs 195	ENST00000269305	10	12	0.3136	1.8519	0.3167	0.9959	0.9276
TP53:132:01:ENST00000269305	4	COAD	1	TP53	132 vs 245	ENST00000269305	4	4	0.3143	NA	0.9994	0.1033	0.0136
TP53:132:01:ENST00000269305	4	COAD	1	TP53	132 vs 266	ENST00000269305	4	4	0.3143	NA	0.9994	0.125	0.0167
TP53:175:01:ENST00000269305	4	GBM	1	TP53	175 vs 282	ENST00000269305	4	6	0.3143	0.3502	0.3406	0.1906	0.0346
TP53:157:01:ENST00000269305	4	HNSC	1	TP53	157 vs 224	ENST00000269305	4	4	0.3143	0.2698	0.292	0.6065	0.325
TP53:158:01:ENST00000269305	4	LGG	1	TP53	158 vs 280	ENST00000269305	4	4	0.3143	NA	0.9996	0.1217	0.0216
TP53:214:01:ENST00000269305	4	LUSC	1	TP53	214 vs 280	ENST00000269305	4	4	0.3143	0.2781	0.2691	0.8825	0.6274
TP53:280:01:ENST00000269305	4	LUSC	1	TP53	280 vs 298	ENST00000269305	4	4	0.3143	2.4966	0.3243	0.3679	0.1383
TP53:275:01:ENST00000269305	4	OV	1	TP53	275 vs 306	ENST00000269305	4	4	0.3143	0.3974	0.2984	0.7788	0.3678
CLMN:842:01:ENST00000298912	4	UCEC	1	CLMN	842 vs 865	ENST00000298912	4	4	0.3143	0	0.9996	0.6769	0.3817
PTEN:342:01:ENST00000371953	4	UCEC	1	PTEN	342 vs 57	ENST00000371953	4	4	0.3143	0.2655	0.2891	0.7359	0.4336
TP53:187:01:ENST00000269305	10	OV	1	TP53	187 vs 261	ENST00000269305	10	4	0.3157	2.0462	0.3331	0.965	0.7852
PIK3CA:345:01:ENST00000263967	8	UCEC	1	PIK3CA	345 vs 420	ENST00000263967	8	7	0.3158	NA	NA	0.4904	0.2312
TP53:132:01:ENST00000269305	6	OV	1	TP53	132 vs 193	ENST00000269305	6	5	0.316	2.2117	0.3091	0.9478	0.7402
TP53:173:01:ENST00000269305	4	BRCA	1	TP53	173 vs 225	ENST00000269305	4	5	0.3175	NA	0.9996	0.8068	0.5192
TP53:173:01:ENST00000269305	4	BRCA	1	TP53	173 vs 242	ENST00000269305	4	5	0.3175	NA	0.9997	0.5556	0.2896
TP53:194:01:ENST00000269305	4	BRCA	1	TP53	194 vs 242	ENST00000269305	4	5	0.3175	NA	0.9997	0.6462	0.3571
TP53:194:01:ENST00000269305	4	BRCA	1	TP53	194 vs 280	ENST00000269305	4	5	0.3175	NA	0.9996	0.9828	0.8523
APC:232:01:ENST00000257430	5	COAD	1	APC	232 vs 943	ENST00000257430	5	4	0.3175	0	0.9994	0.2452	0.0804
TP53:158:01:ENST00000269305	4	LGG	1	TP53	158 vs 196	ENST00000269305	4	5	0.3175	NA	0.9994	0.4198	0.1857
TP53:158:01:ENST00000269305	4	LGG	1	TP53	158 vs 213	ENST00000269305	4	5	0.3175	NA	0.9996	0.9955	0.9242
TP53:220:01:ENST00000269305	5	LUSC	1	TP53	220 vs 280	ENST00000269305	5	4	0.3175	0.3681	0.2788	0.8435	0.5749
PIK3R1:457:01:ENST00000521381	5	UCEC	1	PIK3R1	457 vs 464	ENST00000521381	5	4	0.3175	0	0.9994	0.2452	0.0804
TP53:126:01:ENST00000269305	5	LIHC	1	TP53	126 vs 249	ENST00000269305	5	10	0.3183	0.4558	0.3424	0.3644	0.1431
TP53:157:01:ENST00000269305	4	HNSC	1	TP53	157 vs 175	ENST00000269305	4	12	0.3187	0.3483	0.3251	0.9598	0.7716
TP53:245:01:ENST00000269305	8	OV	1	TP53	245 vs 331	ENST00000269305	8	7	0.3201	0.36	0.2804	0.8844	0.6226
TP53:175:01:ENST00000269305	19	BRCA	1	TP53	175 vs 213	ENST00000269305	19	6	0.3203	NA	0.9994	0.9605	0.774
PTEN:170:01:ENST00000371953	4	UCEC	1	PTEN	170 vs 173	ENST00000371953	4	7	0.3212	3.8423	0.2778	0.9774	0.8299
PIK3CA:1047:01:ENST00000263967	129	BRCA	1	PIK3CA	1047 vs 111	ENST00000263967	129	5	0.3231	0.5961	0.4944	0.3466	0.1051
TP53:175:01:ENST00000269305	8	LUSC	1	TP53	175 vs 307	ENST00000269305	8	5	0.3232	2.1782	0.3242	0.6641	0.3626
APC:1414:01:ENST00000257430	7	COAD	1	APC	1414 vs 1450	ENST00000257430	6	19	0.3235	0.3828	0.3835	0.5556	0.2673
TP53:248:01:ENST00000269305	19	COAD	1	TP53	248 vs 273	ENST00000269305	19	19	0.3238	0.4943	0.3356	0.6586	0.3641
TP53:158:01:ENST00000269305	4	GBM	1	TP53	158 vs 282	ENST00000269305	4	6	0.3238	0.6424	0.55	0.6065	0.239
TP53:125:01:ENST00000269305	4	HNSC	1	TP53	125 vs 306	ENST00000269305	4	6	0.3238	0.4527	0.3528	0.6703	0.2783
TP53:110:01:ENST00000269305	5	HNSC	1	TP53	110 vs 193	ENST00000269305	5	9	0.3247	0.4577	0.3338	0.989	0.882
TP53:110:01:ENST00000269305	5	BRCA	1	TP53	110 vs 282	ENST00000269305	5	5	0.3254	0	0.9994	0.7017	0.412
TP53:132:01:ENST00000269305	5	BRCA	1	TP53	132 vs 282	ENST00000269305	5	5	0.3254	0	0.9994	0.1371	0.0596
TP53:220:01:ENST00000269305	5	LUSC	1	TP53	220 vs 234	ENST00000269305	5	9	0.3257	2.1603	0.2538	0.8808	0.6249
TP53:213:01:ENST00000269305	6	BRCA	1	TP53	213 vs 273	ENST00000269305	6	20	0.3262	0	0.999	0.857	0.5869
TP53:179:01:ENST00000269305	8	HNSC	1	TP53	179 vs 224	ENST00000269305	8	4	0.3273	0.3826	0.3372	0.8952	0.6481
PTEN:136:01:ENST00000371953	7	UCEC	1	PTEN	136 vs 268	ENST00000371953	7	8	0.3282	NA	0.9994	0.7117	0.4095
CTCF:204:01:ENST00000264010	27	UCEC	1	CTCF	204 vs 318	ENST00000264010	27	4	0.3285	0.3225	0.328	0.37	0.2134
FBXW7:465:01:ENST00000281708	13	UCEC	1	FBXW7	465 vs 689	ENST00000281708	13	4	0.3286	0	0.9995	0.8891	0.6381
PIK3R1:564:01:ENST00000521381	6	UCEC	1	PIK3R1	564 vs 575	ENST00000521381	6	5	0.329	0.2197	0.2362	0.1071	0.0189
TP53:244:01:ENST00000269305	6	LUSC	1	TP53	244 vs 331	ENST00000269305	6	7	0.3298	2.8439	0.3658	0.6633	0.3554
PIK3CA:453:01:ENST00000263967	5	BRCA	1	PIK3CA	453 vs 542	ENST00000263967	5	38	0.3299	3.1647	0.3199	0.5946	0.3451
TP53:135:01:ENST00000269305	4	BRCA	1	TP53	135 vs 196	ENST00000269305	4	8	0.3313	NA	0.9996	0.6968	0.4165
PTEN:157:01:ENST00000371953	4	UCEC	1	PTEN	157 vs 268	ENST00000371953	4	8	0.3313	NA	0.9996	0.9994	0.9732
TP53:213:01:ENST00000269305	5	LGG	1	TP53	213 vs 248	ENST00000269305	5	14	0.3314	5.8878	0.2153	0.0989	0.0575
TP53:220:01:ENST00000269305	8	OV	1	TP53	220 vs 331	ENST00000269305	8	7	0.3319	0.3452	0.255	0.466	0.2297
TP53:242:01:ENST00000269305	5	LUSC	1	TP53	242 vs 278	ENST00000269305	5	10	0.3323	2.8629	0.4025	0.9281	0.6948
TP53:175:01:ENST00000269305	8	LUSC	1	TP53	175 vs 242	ENST00000269305	8	5	0.3326	2.2971	0.3533	0.9401	0.7504
APC:499:01:ENST00000257430	6	COAD	1	APC	499 vs 935	ENST00000257430	6	9	0.3329	0	0.9993	0.9338	0.7131
TP53:195:01:ENST00000269305	12	OV	1	TP53	195 vs 248	ENST00000269305	12	21	0.3331	0.6305	0.355	0.9314	0.7077
TP53:213:01:ENST00000269305	6	BRCA	1	TP53	213 vs 285	ENST00000269305	6	4	0.3333	0	0.9995	0.4659	0.2102
TP53:213:01:ENST00000269305	6	BRCA	1	TP53	213 vs 331	ENST00000269305	6	5	0.3333	1	NA	0.7834	0.4834
TP53:285:01:ENST00000269305	4	BRCA	1	TP53	285 vs 331	ENST00000269305	4	5	0.3333	NA	0.9994	0.6569	0.3557
APC:1408:01:ENST00000257430	4	COAD	1	APC	1408 vs 232	ENST00000257430	4	5	0.3333	NA	0.9994	0.5176	0.2236
APC:232:01:ENST00000257430	5	COAD	1	APC	232 vs 499	ENST00000257430	5	6	0.3333	1	NA	0.6193	0.3382
TP53:125:01:ENST00000269305	4	HNSC	1	TP53	125 vs 220	ENST00000269305	4	5	0.3333	NA	0.9994	0.7313	0.4453
TP53:220:01:ENST00000269305	5	HNSC	1	TP53	220 vs 307	ENST00000269305	5	4	0.3333	0	0.9994	0.9563	0.7626
TP53:220:01:ENST00000269305	5	HNSC	1	TP53	220 vs 331	ENST00000269305	5	4	0.3333	0	0.9994	0.9554	0.7603
TP53:152:01:ENST00000269305	4	LUAD	1	TP53	152 vs 193	ENST00000269305	4	5	0.3333	NA	0.9996	0.9368	0.7207
TP53:244:01:ENST00000269305	6	LUSC	1	TP53	244 vs 271	ENST00000269305	6	4	0.3333	2.9937	0.3536	0.8764	0.5968
TP53:249:01:ENST00000269305	7	LUSC	1	TP53	249 vs 307	ENST00000269305	7	5	0.3333	0.3518	0.371	0.3831	0.1618
CDKN2A:114:06:ENST00000304494	6	SKCM	6	CDKN2A	114 vs 51	ENST00000304494	6	4	0.3333	2.2738	0.3808	0.3653	0.0792
ARID1A:1276:01:ENST00000324856	6	UCEC	1	ARID1A	1276 vs 1721	ENST00000324856	6	4	0.3333	NA	0.9996	0.5227	0.2468
ARID1A:1276:01:ENST00000324856	6	UCEC	1	ARID1A	1276 vs 693	ENST00000324856	6	4	0.3333	NA	0.9996	0.6979	0.395
ARID1A:1721:01:ENST00000324856	4	UCEC	1	ARID1A	1721 vs 2141	ENST00000324856	4	6	0.3333	0	0.9996	0.9999	0.99
ARID1A:2141:01:ENST00000324856	6	UCEC	1	ARID1A	2141 vs 693	ENST00000324856	6	4	0.3333	NA	0.9996	0.9085	0.6631
CTCF:448:01:ENST00000264010	7	UCEC	1	CTCF	448 vs 48	ENST00000264010	6	4	0.3333	NA	0.9994	0.9995	0.9753
PIK3CA:108:01:ENST00000263967	6	UCEC	1	PIK3CA	108 vs 111	ENST00000263967	6	4	0.3333	NA	0.9996	0.9999	0.9909
TP53:158:01:ENST00000269305	16	LUSC	1	TP53	158 vs 266	ENST00000269305	16	5	0.3336	0.3288	0.2104	0.56	0.318
TP53:282:01:ENST00000269305	8	HNSC	1	TP53	282 vs 298	ENST00000269305	8	5	0.3341	0.489	0.3179	0.9984	0.9557
TP53:220:01:ENST00000269305	10	BRCA	1	TP53	220 vs 248	ENST00000269305	10	8	0.3357	0.2589	0.2758	0.572	0.3008
TP53:249:01:ENST00000269305	7	LUSC	1	TP53	249 vs 282	ENST00000269305	7	6	0.3357	0.3204	0.3245	0.9999	0.9887
TP53:245:01:ENST00000269305	9	HNSC	1	TP53	245 vs 273	ENST00000269305	9	12	0.3364	0.5196	0.3467	0.2995	0.1128
TP53:157:01:ENST00000269305	14	LUSC	1	TP53	157 vs 158	ENST00000269305	14	16	0.3364	1.7715	0.3318	0.5862	0.3105
CDKN2A:51:01:ENST00000304494	4	HNSC	1	CDKN2A	51 vs 80	ENST00000304494	4	19	0.3383	3.4	0.1401	0.1072	0.0816
TP53:125:01:ENST00000269305	7	LUSC	1	TP53	125 vs 266	ENST00000269305	7	5	0.3384	0.3333	0.3851	0.9993	0.971
TP53:157:01:ENST00000269305	14	LUSC	1	TP53	157 vs 179	ENST00000269305	14	9	0.3403	1.8897	0.3702	0.7979	0.4992
TP53:273:01:ENST00000269305	9	ESCA	1	TP53	273 vs 282	ENST00000269305	9	4	0.3413	0.311	0.2546	0.5351	0.3052
TP53:245:01:ENST00000269305	9	HNSC	1	TP53	245 vs 280	ENST00000269305	9	5	0.3417	0.4466	0.3246	0.494	0.2696
APC:1489:01:ENST00000257430	4	COAD	1	APC	1489 vs 943	ENST00000257430	4	4	0.3429	0	0.9994	0.9892	0.8825
TP53:176:01:ENST00000269305	4	ESCA	1	TP53	176 vs 278	ENST00000269305	4	4	0.3429	2.9031	0.3621	0.8032	0.5052
TP53:237:01:ENST00000269305	4	LGG	1	TP53	237 vs 280	ENST00000269305	4	4	0.3429	0.2987	0.3029	0.9411	0.7313
PIK3R1:464:01:ENST00000521381	5	UCEC	1	PIK3R1	464 vs 567	ENST00000521381	4	4	0.3429	NA	0.9994	0.4285	0.1775
TP53:245:01:ENST00000269305	8	LUAD	1	TP53	245 vs 249	ENST00000269305	6	8	0.3443	0.3252	0.3436	1	0.9937
TP53:237:01:ENST00000269305	4	LGG	1	TP53	237 vs 248	ENST00000269305	4	14	0.3451	2.5317	0.3692	0.2851	0.0756
TP53:248:01:ENST00000269305	10	LUSC	1	TP53	248 vs 282	ENST00000269305	10	6	0.3457	2.1396	0.3696	0.7628	0.4596
TP53:161:01:ENST00000269305	5	BLCA	1	TP53	161 vs 248	ENST00000269305	4	22	0.3472	2.0293	0.2747	0.8191	0.5619
PTEN:136:01:ENST00000371953	7	UCEC	1	PTEN	136 vs 212	ENST00000371953	7	7	0.3473	NA	0.9994	0.5607	0.2798
TP53:176:01:ENST00000269305	8	OV	1	TP53	176 vs 306	ENST00000269305	8	4	0.3475	0.5096	0.3515	0.4355	0.104
ARID1A:1326:01:ENST00000324856	5	UCEC	1	ARID1A	1326 vs 1850	ENST00000324856	5	17	0.3483	0	0.9991	0.976	0.8238
TP53:158:01:ENST00000269305	16	LUSC	1	TP53	158 vs 172	ENST00000269305	16	4	0.3484	NA	0.999	0.4866	0.261
TP53:213:01:ENST00000269305	11	HNSC	1	TP53	213 vs 32	ENST00000269305	11	4	0.3487	0.4669	0.3056	0.9075	0.6738
TP53:105:01:ENST00000269305	5	LUSC	1	TP53	105 vs 234	ENST00000269305	5	9	0.3487	0.5378	0.363	0.9528	0.7585
TP53:173:01:ENST00000269305	4	BRCA	1	TP53	173 vs 187	ENST00000269305	4	5	0.3492	NA	0.9996	0.261	0.109
TP53:187:01:ENST00000269305	5	BRCA	1	TP53	187 vs 194	ENST00000269305	5	4	0.3492	0	0.9996	0.1634	0.0677
TP53:225:01:ENST00000269305	5	BRCA	1	TP53	225 vs 285	ENST00000269305	5	4	0.3492	0	0.9994	0.6203	0.3258
TP53:159:01:ENST00000269305	4	LUSC	1	TP53	159 vs 176	ENST00000269305	4	5	0.3492	0.3463	0.3451	0.266	0.0514
TP53:193:01:ENST00000269305	5	OV	1	TP53	193 vs 307	ENST00000269305	5	4	0.3492	0.4707	0.3303	0.7788	0.3678
PIK3CA:345:01:ENST00000263967	8	UCEC	1	PIK3CA	345 vs 542	ENST00000263967	8	23	0.3496	3.446	0.3878	0.9511	0.7542
TP53:154:01:ENST00000269305	7	LUSC	1	TP53	154 vs 273	ENST00000269305	7	13	0.35	0.483	0.3745	0.6098	0.311
TP53:105:01:ENST00000269305	5	LUSC	1	TP53	105 vs 244	ENST00000269305	5	6	0.3506	0.3659	0.2941	0.2292	0.0428
TP53:241:01:ENST00000269305	6	OV	1	TP53	241 vs 282	ENST00000269305	6	5	0.3506	0.3528	0.2613	0.5148	0.2607
APC:1556:01:ENST00000257430	9	COAD	1	APC	1556 vs 213	ENST00000257430	9	12	0.3511	3.2271	0.3162	0.823	0.5296
TP53:105:01:ENST00000269305	5	LUSC	1	TP53	105 vs 273	ENST00000269305	5	14	0.3521	0.4841	0.3832	0.1149	0.0247
TP53:152:01:ENST00000269305	4	LUAD	1	TP53	152 vs 245	ENST00000269305	4	6	0.3524	NA	0.9996	0.8304	0.5514
TP53:126:01:ENST00000269305	6	LUSC	1	TP53	126 vs 214	ENST00000269305	6	4	0.3524	3.0619	0.3362	0.9593	0.7723
TP53:132:01:ENST00000269305	6	OV	1	TP53	132 vs 281	ENST00000269305	6	4	0.3524	2.8763	0.3467	0.4527	0.204
TP53:278:01:ENST00000269305	10	LUSC	1	TP53	278 vs 331	ENST00000269305	10	7	0.3535	0.3333	0.442	0.0664	0.0279
TP53:179:01:ENST00000269305	9	LUSC	1	TP53	179 vs 187	ENST00000269305	9	6	0.354	0.4474	0.3316	0.5421	0.2898
TP53:273:01:ENST00000269305	12	HNSC	1	TP53	273 vs 298	ENST00000269305	12	5	0.3542	0.53	0.3269	0.8729	0.6221
APC:1114:01:ENST00000257430	7	COAD	1	APC	1114 vs 499	ENST00000257430	7	6	0.3555	1	NA	0.795	0.5028
TP53:163:01:ENST00000269305	7	HNSC	1	TP53	163 vs 175	ENST00000269305	7	12	0.3556	0.5433	0.3785	0.7519	0.453
TP53:163:01:ENST00000269305	9	OV	1	TP53	163 vs 192	ENST00000269305	9	5	0.3556	2.7776	0.3519	0.7664	0.4682
TP53:157:01:ENST00000269305	4	HNSC	1	TP53	157 vs 273	ENST00000269305	4	12	0.356	0.3905	0.3798	0.8912	0.6368
PIK3CA:453:01:ENST00000263967	5	BRCA	1	PIK3CA	453 vs 726	ENST00000263967	5	9	0.3566	NA	0.9996	0.991	0.8934
TP53:220:01:ENST00000269305	9	LGG	1	TP53	220 vs 273	ENST00000269305	9	58	0.357	0.4242	0.4098	0.9859	0.8665
PIK3CA:542:01:ENST00000263967	15	BLCA	1	PIK3CA	542 vs 545	ENST00000263967	15	28	0.3573	0.6673	0.3743	0.9485	0.7464
TP53:266:01:ENST00000269305	4	COAD	1	TP53	266 vs 273	ENST00000269305	4	19	0.3573	0	0.999	0.9087	0.6623
TP53:132:01:ENST00000269305	5	BRCA	1	TP53	132 vs 248	ENST00000269305	5	8	0.3574	0.3904	0.4482	0.4269	0.1906
TP53:157:01:ENST00000269305	4	HNSC	1	TP53	157 vs 213	ENST00000269305	4	11	0.3575	0.3855	0.386	0.8407	0.5646
TP53:179:01:ENST00000269305	8	HNSC	1	TP53	179 vs 273	ENST00000269305	8	12	0.3575	0.4815	0.3637	0.1943	0.0761
TP53:194:01:ENST00000269305	4	BRCA	1	TP53	194 vs 220	ENST00000269305	4	10	0.3576	4.7434	0.2953	0.0095	0.0035
TP53:213:01:ENST00000269305	4	ESCA	1	TP53	213 vs 273	ENST00000269305	4	9	0.358	2.0845	0.3724	0.9168	0.6661
TP53:157:01:ENST00000269305	14	LUSC	1	TP53	157 vs 271	ENST00000269305	14	4	0.3582	2.5503	0.3953	0.6773	0.3569
TP53:196:01:ENST00000269305	8	HNSC	1	TP53	196 vs 220	ENST00000269305	8	5	0.359	NA	0.9993	0.9515	0.7522
TP53:176:01:ENST00000269305	8	OV	1	TP53	176 vs 244	ENST00000269305	8	5	0.359	2.9799	0.3302	0.8571	0.579
FGFR3:370:01:ENST00000260795	4	BLCA	1	FGFR3	370 vs 373	ENST00000260795	4	8	0.3596	2.6458	0.4923	0.3785	0.1916
TP53:245:01:ENST00000269305	8	OV	1	TP53	245 vs 306	ENST00000269305	8	4	0.3596	0.5232	0.4003	0.338	0.0626
CELSR1:1849:01:ENST00000262738	4	UCEC	1	CELSR1	1849 vs 614	ENST00000262738	4	8	0.3596	4.2426	0.3141	0.9236	0.6957
APC:213:01:ENST00000257430	12	COAD	1	APC	213 vs 302	ENST00000257430	12	5	0.3597	0.2412	0.2468	0.9767	0.8261
TP53:213:01:ENST00000269305	11	HNSC	1	TP53	213 vs 245	ENST00000269305	11	9	0.3598	1.977	0.3528	0.5952	0.282
TP53:179:01:ENST00000269305	9	LUSC	1	TP53	179 vs 298	ENST00000269305	9	4	0.3608	0.4494	0.3843	0.7558	0.4266
TP53:179:01:ENST00000269305	4	GBM	1	TP53	179 vs 273	ENST00000269305	4	6	0.3619	2.9037	0.3581	0.5717	0.2691
PIK3CA:542:01:ENST00000263967	23	UCEC	1	PIK3CA	542 vs 88	ENST00000263967	23	16	0.3622	0.5083	0.6325	0.9447	0.7349
TP53:176:01:ENST00000269305	8	OV	1	TP53	176 vs 331	ENST00000269305	8	7	0.363	0.4322	0.2975	0.2368	0.1006
TP53:179:01:ENST00000269305	9	LGG	1	TP53	179 vs 273	ENST00000269305	9	59	0.3631	2.9003	0.1989	0.7358	0.453
TP53:175:01:ENST00000269305	8	LUSC	1	TP53	175 vs 273	ENST00000269305	8	14	0.3632	1.8797	0.3327	0.9527	0.7688
TP53:176:01:ENST00000269305	6	BRCA	1	TP53	176 vs 282	ENST00000269305	6	5	0.3636	0	0.9994	0.8564	0.5854
TP53:213:01:ENST00000269305	6	BRCA	1	TP53	213 vs 282	ENST00000269305	6	5	0.3636	0	0.9994	0.9909	0.8927
TP53:238:01:ENST00000269305	5	OV	1	TP53	238 vs 278	ENST00000269305	5	6	0.3636	4.2154	0.2444	0.6521	0.3618
PTEN:157:01:ENST00000371953	4	UCEC	1	PTEN	157 vs 267	ENST00000371953	4	7	0.3636	NA	0.9996	0.9189	0.6738
APC:1450:01:ENST00000257430	19	COAD	1	APC	1450 vs 232	ENST00000257430	19	5	0.3646	NA	0.999	0.6078	0.3424
TP53:236:01:ENST00000269305	4	HNSC	1	TP53	236 vs 273	ENST00000269305	4	12	0.3648	0.3862	0.3812	0.5286	0.2877
TP53:248:01:ENST00000269305	21	OV	1	TP53	248 vs 272	ENST00000269305	21	6	0.365	1.7642	0.3947	0.9008	0.6381
TP53:110:01:ENST00000269305	5	HNSC	1	TP53	110 vs 32	ENST00000269305	5	4	0.3651	0.4127	0.3383	0.926	0.7002
TP53:280:01:ENST00000269305	5	HNSC	1	TP53	280 vs 283	ENST00000269305	5	4	0.3651	3.0738	0.3323	0.9977	0.9458
TP53:248:01:ENST00000269305	4	LUAD	1	TP53	248 vs 273	ENST00000269305	4	5	0.3651	0	0.9994	0.9999	0.9896
TP53:242:01:ENST00000269305	5	LUSC	1	TP53	242 vs 266	ENST00000269305	5	5	0.3651	0.3333	0.3851	0.9841	0.8614
TP53:234:01:ENST00000269305	5	OV	1	TP53	234 vs 275	ENST00000269305	5	4	0.3651	0	0.9995	0.6049	0.3138
TP53:245:01:ENST00000269305	4	PAAD	1	TP53	245 vs 282	ENST00000269305	4	5	0.3651	0.4259	0.3297	0.9949	0.9192
TP53:220:01:ENST00000269305	4	STAD	1	TP53	220 vs 282	ENST00000269305	4	5	0.3651	0.3191	0.3319	0.9985	0.9556
PIK3CA:1044:01:ENST00000263967	6	UCEC	1	PIK3CA	1044 vs 542	ENST00000263967	6	23	0.3665	4.2205	0.3094	0.9727	0.8119
TP53:187:01:ENST00000269305	5	BRCA	1	TP53	187 vs 248	ENST00000269305	5	8	0.3667	0.3279	0.3713	0.3193	0.1225
TP53:261:01:ENST00000269305	4	OV	1	TP53	261 vs 273	ENST00000269305	4	19	0.3675	2.0723	0.2874	0.9884	0.8806
TP53:271:01:ENST00000269305	4	BLCA	1	TP53	271 vs 285	ENST00000269305	4	10	0.3676	2.0216	0.3634	0.2678	0.0377
TP53:151:01:ENST00000269305	5	HNSC	1	TP53	151 vs 193	ENST00000269305	5	9	0.3676	0.5753	0.3844	0.9994	0.9717
CDKN2A:153:01:ENST00000304494	9	HNSC	1	CDKN2A	153 vs 88	ENST00000304494	8	4	0.3677	2.6281	0.3901	0.9968	0.9359
TP53:157:01:ENST00000269305	4	HNSC	1	TP53	157 vs 282	ENST00000269305	4	8	0.3677	0.3543	0.363	0.9037	0.6552
PIK3CA:453:01:ENST00000263967	5	BRCA	1	PIK3CA	453 vs 545	ENST00000263967	5	58	0.368	3.1888	0.3005	0.999	0.9655
APC:213:01:ENST00000257430	12	COAD	1	APC	213 vs 935	ENST00000257430	12	9	0.3692	0.3247	0.3334	0.7649	0.4625
TP53:175:01:ENST00000269305	15	OV	1	TP53	175 vs 220	ENST00000269305	15	8	0.3695	0.5645	0.3692	0.8509	0.5619
TP53:278:01:ENST00000269305	10	LUSC	1	TP53	278 vs 298	ENST00000269305	10	4	0.3696	0.4355	0.4206	0.7551	0.4205
TP53:135:01:ENST00000269305	7	ESCA	1	TP53	135 vs 187	ENST00000269305	7	4	0.3697	NA	0.9994	0.9457	0.7406
TP53:157:01:ENST00000269305	14	LUSC	1	TP53	157 vs 248	ENST00000269305	14	10	0.3702	0.5611	0.3666	0.8132	0.5278
TP53:213:01:ENST00000269305	4	ESCA	1	TP53	213 vs 278	ENST00000269305	4	4	0.3714	2.9031	0.3621	0.884	0.6154
TP53:125:01:ENST00000269305	4	HNSC	1	TP53	125 vs 157	ENST00000269305	4	4	0.3714	3.2819	0.344	0.5292	0.2731
TP53:224:01:ENST00000269305	4	HNSC	1	TP53	224 vs 283	ENST00000269305	4	4	0.3714	3.1898	0.3452	0.909	0.6655
TP53:224:01:ENST00000269305	4	HNSC	1	TP53	224 vs 294	ENST00000269305	4	4	0.3714	3.1898	0.3452	0.909	0.6655
TP53:224:01:ENST00000269305	4	HNSC	1	TP53	224 vs 306	ENST00000269305	4	6	0.3714	0.4527	0.3528	0.9667	0.7963
TP53:193:01:ENST00000269305	4	LGG	1	TP53	193 vs 245	ENST00000269305	4	6	0.3714	3.1623	0.4277	0.5051	0.2664
TP53:159:01:ENST00000269305	4	LUSC	1	TP53	159 vs 280	ENST00000269305	4	4	0.3714	0.2781	0.2691	0.9948	0.9178
PTEN:268:01:ENST00000371953	8	UCEC	1	PTEN	268 vs 57	ENST00000371953	8	4	0.3717	0	0.9995	0.4192	0.1711
TP53:163:01:ENST00000269305	7	LUSC	1	TP53	163 vs 278	ENST00000269305	7	10	0.372	2.4495	0.5386	0.4044	0.1961
TP53:245:01:ENST00000269305	5	BRCA	1	TP53	245 vs 282	ENST00000269305	5	5	0.373	0.3111	0.3532	0.9997	0.9808
TP53:159:01:ENST00000269305	4	BLCA	1	TP53	159 vs 280	ENST00000269305	4	13	0.3731	2.3875	0.3493	0.6309	0.3701
TP53:152:01:ENST00000269305	5	STAD	1	TP53	152 vs 273	ENST00000269305	5	11	0.3732	0.3769	0.3736	0.4325	0.2101
TP53:175:01:ENST00000269305	19	BRCA	1	TP53	175 vs 342	ENST00000269305	19	9	0.3734	NA	0.9994	0.792	0.5036
EGFR:598:01:ENST00000275493	13	GBM	1	EGFR	598 vs 774	ENST00000275493	13	4	0.3739	0.4606	0.2668	0.3943	0.2503
TP53:248:01:ENST00000269305	10	LUSC	1	TP53	248 vs 271	ENST00000269305	10	4	0.3756	2.6481	0.3789	0.4306	0.1703
TP53:193:01:ENST00000269305	7	LUSC	1	TP53	193 vs 298	ENST00000269305	7	4	0.3758	0.2743	0.2918	0.5338	0.229
TP53:105:01:ENST00000269305	5	LUSC	1	TP53	105 vs 125	ENST00000269305	5	7	0.3763	2.6463	0.4054	0.2103	0.0614
TP53:244:01:ENST00000269305	5	OV	1	TP53	244 vs 278	ENST00000269305	5	6	0.3766	0.3513	0.3709	0.976	0.8258
TP53:175:01:ENST00000269305	11	STAD	1	TP53	175 vs 176	ENST00000269305	11	5	0.3773	0.3493	0.4094	0.0884	0.0151
TP53:105:01:ENST00000269305	5	LUSC	1	TP53	105 vs 248	ENST00000269305	5	10	0.3776	0.4748	0.3828	0.2248	0.0726
TP53:175:01:ENST00000269305	19	BRCA	1	TP53	175 vs 187	ENST00000269305	19	5	0.3777	2.2708	0.4838	0.272	0.0858
TP53:125:01:ENST00000269305	7	LUSC	1	TP53	125 vs 282	ENST00000269305	7	6	0.3788	0.3179	0.363	0.8464	0.5587
TP53:238:01:ENST00000269305	5	OV	1	TP53	238 vs 273	ENST00000269305	5	19	0.3804	4.0813	0.1291	0.2068	0.1166
TP53:157:01:ENST00000269305	4	BRCA	1	TP53	157 vs 187	ENST00000269305	4	5	0.381	NA	NA	0.1086	0.0381
TP53:187:01:ENST00000269305	5	BRCA	1	TP53	187 vs 195	ENST00000269305	5	4	0.381	NA	NA	0.0734	0.0271
TP53:187:01:ENST00000269305	5	BRCA	1	TP53	187 vs 238	ENST00000269305	5	4	0.381	NA	NA	0.0734	0.0271
TP53:125:01:ENST00000269305	4	HNSC	1	TP53	125 vs 176	ENST00000269305	4	6	0.381	2.1787	0.4399	0.611	0.3471
TP53:176:01:ENST00000269305	6	HNSC	1	TP53	176 vs 307	ENST00000269305	6	4	0.381	0.459	0.4399	0.9981	0.9511
TP53:176:01:ENST00000269305	5	LUSC	1	TP53	176 vs 214	ENST00000269305	5	4	0.381	2.7814	0.3624	0.2615	0.0507
TP53:238:01:ENST00000269305	5	OV	1	TP53	238 vs 275	ENST00000269305	5	4	0.381	3.7064	0.292	0.2474	0.0469
TP53:266:01:ENST00000269305	5	OV	1	TP53	266 vs 306	ENST00000269305	5	4	0.381	1.9437	0.3672	1	1
TP53:179:01:ENST00000269305	4	PAAD	1	TP53	179 vs 273	ENST00000269305	4	5	0.381	3.7376	0.2859	0.0762	0.0228
PIK3R1:464:01:ENST00000521381	5	UCEC	1	PIK3R1	464 vs 564	ENST00000521381	4	6	0.381	2.1861	0.4499	0.9461	0.7429
APC:1408:01:ENST00000257430	4	COAD	1	APC	1408 vs 1450	ENST00000257430	4	19	0.3813	2.2386	0.3414	0.4172	0.1378
FGFR2:252:01:ENST00000358487	22	UCEC	1	FGFR2	252 vs 382	ENST00000358487	22	6	0.3818	NA	0.999	0.9746	0.822
TP53:234:01:ENST00000269305	9	LUSC	1	TP53	234 vs 331	ENST00000269305	9	7	0.3822	3.1623	0.3041	0.0305	0.0077
PIK3CA:1047:01:ENST00000263967	41	UCEC	1	PIK3CA	1047 vs 345	ENST00000263967	41	7	0.3839	0.4014	0.4298	0.57	0.3186
TP53:175:01:ENST00000269305	19	BRCA	1	TP53	175 vs 248	ENST00000269305	19	8	0.3846	0.4082	0.3716	0.9993	0.97
PIK3R1:564:01:ENST00000521381	6	UCEC	1	PIK3R1	564 vs 576	ENST00000521381	6	7	0.3846	NA	0.9994	0.2235	0.0753
TP53:175:01:ENST00000269305	12	HNSC	1	TP53	175 vs 176	ENST00000269305	12	6	0.3857	2.0103	0.3851	0.7044	0.392
TP53:163:01:ENST00000269305	7	LUSC	1	TP53	163 vs 187	ENST00000269305	7	6	0.3858	0.3834	0.4076	0.8458	0.5602
CTNNB1:33:01:ENST00000349496	27	UCEC	1	CTNNB1	33 vs 41	ENST00000349496	26	11	0.386	NA	0.9992	0.8136	0.5121
TP53:163:01:ENST00000269305	9	OV	1	TP53	163 vs 220	ENST00000269305	9	8	0.3866	1.805	0.3866	0.7451	0.4461
TP53:214:01:ENST00000269305	4	LUSC	1	TP53	214 vs 278	ENST00000269305	4	10	0.3876	3.4641	0.3809	0.1251	0.0667
TP53:214:01:ENST00000269305	4	LUSC	1	TP53	214 vs 249	ENST00000269305	4	7	0.3879	2.8577	0.4601	0.1958	0.0967
TP53:249:01:ENST00000269305	7	LUSC	1	TP53	249 vs 298	ENST00000269305	7	4	0.3879	0.2477	0.2553	0.9919	0.8981
PTEN:173:01:ENST00000371953	7	UCEC	1	PTEN	173 vs 57	ENST00000371953	7	4	0.3879	0.342	0.3851	0.9756	0.8226
TP53:193:01:ENST00000269305	9	HNSC	1	TP53	193 vs 307	ENST00000269305	9	4	0.3888	1.9546	0.4071	0.8486	0.563
PIK3CA:542:01:ENST00000263967	23	UCEC	1	PIK3CA	542 vs 546	ENST00000263967	23	18	0.3895	0.3528	0.3702	0.6099	0.3207
TP53:213:01:ENST00000269305	5	LGG	1	TP53	213 vs 245	ENST00000269305	5	6	0.3896	4.4721	0.2903	0.0952	0.0344
TP53:195:01:ENST00000269305	12	OV	1	TP53	195 vs 275	ENST00000269305	12	4	0.3901	1.8864	0.4487	0.5194	0.2195
TP53:193:01:ENST00000269305	4	LGG	1	TP53	193 vs 248	ENST00000269305	4	14	0.3915	2.5442	0.4502	0.7828	0.505
APC:1489:01:ENST00000257430	4	COAD	1	APC	1489 vs 1556	ENST00000257430	4	9	0.3916	0	0.9993	0.9636	0.7838
TP53:179:01:ENST00000269305	8	HNSC	1	TP53	179 vs 220	ENST00000269305	8	5	0.3916	NA	0.9994	0.9291	0.7001
PIK3CA:1044:01:ENST00000263967	6	UCEC	1	PIK3CA	1044 vs 1047	ENST00000263967	6	41	0.3931	2.4932	0.4314	0.9484	0.7496
APC:1378:01:ENST00000257430	6	COAD	1	APC	1378 vs 805	ENST00000257430	6	5	0.3939	2.9243	0.3851	0.8567	0.578
TP53:173:01:ENST00000269305	7	HNSC	1	TP53	173 vs 32	ENST00000269305	7	4	0.3939	0.4488	0.3283	0.9596	0.7797
TP53:135:01:ENST00000269305	4	LUSC	1	TP53	135 vs 193	ENST00000269305	4	7	0.3939	3.4641	0.3809	0.9226	0.6926
TP53:175:01:ENST00000269305	8	UCEC	1	TP53	175 vs 248	ENST00000269305	8	15	0.3957	2.0591	0.4306	0.8167	0.5177
PTEN:130:01:ENST00000371953	66	UCEC	1	PTEN	130 vs 16	ENST00000371953	63	4	0.3961	NA	0.9989	0.9024	0.6402
TP53:176:01:ENST00000269305	5	COAD	1	TP53	176 vs 273	ENST00000269305	5	19	0.3965	2.2569	0.3516	0.9619	0.7845
TP53:187:01:ENST00000269305	5	BRCA	1	TP53	187 vs 280	ENST00000269305	5	5	0.3968	0.2887	0.3809	0.1595	0.0562
APC:1489:01:ENST00000257430	4	COAD	1	APC	1489 vs 302	ENST00000257430	4	5	0.3968	0	0.9994	0.8186	0.5271
TP53:176:01:ENST00000269305	5	COAD	1	TP53	176 vs 266	ENST00000269305	5	4	0.3968	NA	0.9994	0.941	0.7244
TP53:110:01:ENST00000269305	5	HNSC	1	TP53	110 vs 283	ENST00000269305	5	4	0.3968	2.0583	0.5575	0.9034	0.651
TP53:110:01:ENST00000269305	5	HNSC	1	TP53	110 vs 294	ENST00000269305	5	4	0.3968	2.395	0.4836	0.596	0.2978
TP53:213:01:ENST00000269305	5	LGG	1	TP53	213 vs 280	ENST00000269305	5	4	0.3968	NA	0.9995	0.2673	0.0981
TP53:172:01:ENST00000269305	4	LUSC	1	TP53	172 vs 242	ENST00000269305	4	5	0.3968	0	0.9995	0.9481	0.7451
TP53:172:01:ENST00000269305	4	LUSC	1	TP53	172 vs 266	ENST00000269305	4	5	0.3968	0	0.9995	0.9481	0.7451
TP53:179:01:ENST00000269305	5	OV	1	TP53	179 vs 342	ENST00000269305	5	4	0.3968	0.2847	0.3093	0.1449	0.02
TP53:151:01:ENST00000269305	5	HNSC	1	TP53	151 vs 273	ENST00000269305	5	12	0.3982	1.8039	0.3657	0.9988	0.9603
TP53:176:01:ENST00000269305	6	HNSC	1	TP53	176 vs 213	ENST00000269305	6	11	0.3987	0.5161	0.4191	0.963	0.7824
APC:232:01:ENST00000257430	5	COAD	1	APC	232 vs 876	ENST00000257430	5	12	0.3988	0	0.999	0.3156	0.1526
CTNNB1:32:01:ENST00000349496	14	UCEC	1	CTNNB1	32 vs 45	ENST00000349496	14	4	0.3993	0.25	0.3368	0.6152	0.2939
TP53:173:01:ENST00000269305	4	BRCA	1	TP53	173 vs 220	ENST00000269305	4	10	0.3996	4.4721	0.2947	0.1045	0.0639
TP53:173:01:ENST00000269305	4	BRCA	1	TP53	173 vs 238	ENST00000269305	4	4	0.4	1	NA	0.9624	0.7813
TP53:194:01:ENST00000269305	4	BRCA	1	TP53	194 vs 195	ENST00000269305	4	4	0.4	NA	0.9996	0.8332	0.5457
APC:564:01:ENST00000257430	4	COAD	1	APC	564 vs 941	ENST00000257430	4	4	0.4	1	NA	0.9732	0.8152
TP53:224:01:ENST00000269305	4	HNSC	1	TP53	224 vs 278	ENST00000269305	4	4	0.4	3.4115	0.3276	0.9711	0.8093
VHL:115:01:ENST00000256474	4	KIRC	1	VHL	115 vs 130	ENST00000256474	4	4	0.4	1	NA	0.2071	0.073
CIC:1515:01:ENST00000575354	4	LGG	1	CIC	1515 vs 201	ENST00000575354	4	4	0.4	1	NA	1	0.9971
TP53:125:01:ENST00000269305	4	LGG	1	TP53	125 vs 173	ENST00000269305	4	4	0.4	NA	0.9994	0.5717	0.2691
TP53:261:01:ENST00000269305	4	OV	1	TP53	261 vs 275	ENST00000269305	4	4	0.4	2.1709	0.4053	0.971	0.8096
TP53:275:01:ENST00000269305	4	OV	1	TP53	275 vs 307	ENST00000269305	4	4	0.4	0.4871	0.4084	0.7788	0.3678
FBXW7:479:01:ENST00000281708	6	UCEC	1	FBXW7	479 vs 689	ENST00000281708	6	4	0.4	0	0.9996	0.9988	0.9612
PTEN:157:01:ENST00000371953	4	UCEC	1	PTEN	157 vs 290	ENST00000371953	4	6	0.4	NA	0.9996	0.8075	0.5014
TP53:175:01:ENST00000269305	11	STAD	1	TP53	175 vs 248	ENST00000269305	11	7	0.4003	0.3474	0.3913	0.8651	0.584
CTNNB1:35:01:ENST00000349496	4	LIHC	1	CTNNB1	35 vs 45	ENST00000349496	4	16	0.4008	0	0.999	0.9396	0.73
PIK3CA:542:01:ENST00000263967	10	COAD	1	PIK3CA	542 vs 545	ENST00000263967	10	31	0.402	0.4426	0.451	0.995	0.9197
TP53:163:01:ENST00000269305	7	LUSC	1	TP53	163 vs 273	ENST00000269305	7	14	0.4039	0.4002	0.3998	0.5914	0.3178
TP53:173:01:ENST00000269305	4	BRCA	1	TP53	173 vs 248	ENST00000269305	4	8	0.404	3.873	0.3423	0.6255	0.3548
TP53:220:01:ENST00000269305	8	OV	1	TP53	220 vs 275	ENST00000269305	8	4	0.404	1.952	0.4321	0.8539	0.5625
TP53:234:01:ENST00000269305	5	OV	1	TP53	234 vs 245	ENST00000269305	5	8	0.404	0	0.9994	0.9267	0.6989
PIK3CA:1043:01:ENST00000263967	7	UCEC	1	PIK3CA	1043 vs 38	ENST00000263967	7	10	0.405	0.3857	0.3955	0.9077	0.6625
TP53:187:01:ENST00000269305	6	LUSC	1	TP53	187 vs 245	ENST00000269305	6	14	0.4061	1.9331	0.3781	0.5901	0.33
TP53:298:01:ENST00000269305	4	LUSC	1	TP53	298 vs 331	ENST00000269305	4	7	0.4061	3.2388	0.3392	0.3816	0.1354
TP53:193:01:ENST00000269305	7	LUSC	1	TP53	193 vs 278	ENST00000269305	7	10	0.4065	2.4495	0.5268	0.3268	0.1477
TP53:173:01:ENST00000269305	7	HNSC	1	TP53	173 vs 220	ENST00000269305	7	5	0.4066	2.6482	0.3998	0.9967	0.935
TP53:195:01:ENST00000269305	12	OV	1	TP53	195 vs 278	ENST00000269305	12	6	0.4079	1.7298	0.4461	0.6748	0.3603
TP53:193:01:ENST00000269305	9	BRCA	1	TP53	193 vs 285	ENST00000269305	9	4	0.4084	0	0.9995	0.0157	0.0006
TP53:285:01:ENST00000269305	4	BRCA	1	TP53	285 vs 342	ENST00000269305	4	9	0.4084	NA	0.9995	0.0157	0.0006
APC:1408:01:ENST00000257430	4	COAD	1	APC	1408 vs 499	ENST00000257430	4	6	0.4095	2.9243	0.3851	0.8354	0.5282
TP53:126:01:ENST00000269305	6	LUSC	1	TP53	126 vs 159	ENST00000269305	6	4	0.4095	2.6323	0.4095	0.9662	0.7925
TP53:187:01:ENST00000269305	6	LUSC	1	TP53	187 vs 271	ENST00000269305	6	4	0.4095	2.6157	0.4198	0.7191	0.4033
TP53:213:01:ENST00000269305	6	STAD	1	TP53	213 vs 220	ENST00000269305	6	4	0.4095	2.8941	0.3705	0.6776	0.3831
CDKN2A:110:01:ENST00000304494	8	HNSC	1	CDKN2A	110 vs 80	ENST00000304494	8	19	0.4097	1.6484	0.3734	0.9684	0.8017
TP53:234:01:ENST00000269305	5	OV	1	TP53	234 vs 273	ENST00000269305	5	19	0.4106	0.3969	0.3899	0.3219	0.1674
GATA3:335:01:ENST00000346208	12	BRCA	1	GATA3	335 vs 408	ENST00000346208	12	12	0.4111	3.5946	0.3066	0.2961	0.1222
TP53:132:01:ENST00000269305	6	OV	1	TP53	132 vs 273	ENST00000269305	6	19	0.4111	1.7304	0.3557	0.8947	0.65
TP53:192:01:ENST00000269305	5	OV	1	TP53	192 vs 272	ENST00000269305	5	6	0.4113	0.3879	0.4192	0.6892	0.3843
TP53:159:01:ENST00000269305	4	BLCA	1	TP53	159 vs 241	ENST00000269305	4	5	0.4127	3.7376	0.2859	0.0762	0.0228
APC:1408:01:ENST00000257430	4	COAD	1	APC	1408 vs 805	ENST00000257430	4	5	0.4127	3.2388	0.3392	0.8537	0.5583
APC:232:01:ENST00000257430	5	COAD	1	APC	232 vs 302	ENST00000257430	5	5	0.4127	0	0.9994	0.9241	0.6907
TP53:158:01:ENST00000269305	5	LUAD	1	TP53	158 vs 193	ENST00000269305	5	5	0.4127	NA	0.9994	0.1966	0.0617
TP53:176:01:ENST00000269305	5	LUSC	1	TP53	176 vs 298	ENST00000269305	5	4	0.4127	2.012	0.4059	0.7788	0.3678
TP53:242:01:ENST00000269305	5	LUSC	1	TP53	242 vs 307	ENST00000269305	5	5	0.4127	3.2819	0.344	0.4299	0.1915
TP53:157:01:ENST00000269305	14	LUSC	1	TP53	157 vs 244	ENST00000269305	14	6	0.4129	0.4993	0.3755	0.9881	0.8776
TP53:163:01:ENST00000269305	7	HNSC	1	TP53	163 vs 273	ENST00000269305	7	12	0.4134	0.5818	0.4335	0.6546	0.3634
TP53:125:01:ENST00000269305	4	HNSC	1	TP53	125 vs 245	ENST00000269305	4	9	0.414	2.0555	0.432	0.1501	0.0868
TP53:245:01:ENST00000269305	9	HNSC	1	TP53	245 vs 307	ENST00000269305	9	4	0.414	0.4865	0.432	0.6666	0.3262
TP53:175:01:ENST00000269305	22	COAD	1	TP53	175 vs 248	ENST00000269305	22	19	0.4145	0.5361	0.4215	0.7302	0.431
TP53:187:01:ENST00000269305	10	OV	1	TP53	187 vs 241	ENST00000269305	10	6	0.4153	1.6782	0.4349	0.4737	0.2035
FGFR3:249:01:ENST00000260795	29	BLCA	1	FGFR3	249 vs 370	ENST00000260795	29	4	0.4155	0.1742	0.1332	0.0126	0.0243
TP53:245:01:ENST00000269305	9	HNSC	1	TP53	245 vs 337	ENST00000269305	9	5	0.4156	0.4435	0.3746	0.2541	0.1224
TP53:271:01:ENST00000269305	4	LUSC	1	TP53	271 vs 273	ENST00000269305	4	14	0.4157	0.4395	0.4497	0.3992	0.1387
TP53:175:01:ENST00000269305	12	READ	1	TP53	175 vs 282	ENST00000269305	12	8	0.4167	2.64	0.4016	0.8858	0.6194
TP53:158:01:ENST00000269305	4	LGG	1	TP53	158 vs 273	ENST00000269305	4	57	0.4168	4.4598	0.1993	0.954	0.7605
KMT2D:2354:01:ENST00000301067	10	UCEC	1	KMT2D	2354 vs 647	ENST00000301067	10	5	0.4169	0.2949	0.3203	0.498	0.2135
TP53:173:01:ENST00000269305	7	HNSC	1	TP53	173 vs 245	ENST00000269305	7	9	0.4175	1.8734	0.4455	0.9677	0.8556
TP53:175:01:ENST00000269305	11	STAD	1	TP53	175 vs 220	ENST00000269305	11	4	0.419	NA	0.9996	0.6174	0.3001
TP53:280:01:ENST00000269305	13	BLCA	1	TP53	280 vs 285	ENST00000269305	13	10	0.4191	0.5563	0.41	0.998	0.9499
TP53:273:01:ENST00000269305	9	ESCA	1	TP53	273 vs 278	ENST00000269305	9	4	0.4196	2.438	0.4298	0.9075	0.6536
TP53:220:01:ENST00000269305	8	OV	1	TP53	220 vs 306	ENST00000269305	8	4	0.4202	0.5635	0.423	0.4497	0.1095
TP53:193:01:ENST00000269305	5	OV	1	TP53	193 vs 234	ENST00000269305	5	5	0.4206	NA	0.9995	0.4206	0.1924
TP53:273:01:ENST00000269305	12	HNSC	1	TP53	273 vs 283	ENST00000269305	12	4	0.422	2.3542	0.4234	0.7224	0.4358
TP53:248:01:ENST00000269305	22	BLCA	1	TP53	248 vs 285	ENST00000269305	22	10	0.4221	1.5745	0.4295	0.8854	0.6254
TP53:179:01:ENST00000269305	8	HNSC	1	TP53	179 vs 213	ENST00000269305	8	11	0.4222	0.5027	0.4122	0.4672	0.222
TP53:193:01:ENST00000269305	9	HNSC	1	TP53	193 vs 298	ENST00000269305	9	5	0.4226	1.6226	0.4494	0.9609	0.7794
TP53:248:01:ENST00000269305	19	COAD	1	TP53	248 vs 331	ENST00000269305	19	4	0.423	0.3689	0.4163	0.6875	0.3951
TP53:175:01:ENST00000269305	15	OV	1	TP53	175 vs 342	ENST00000269305	15	4	0.4241	0.6259	0.4826	0.2893	0.0383
TP53:173:01:ENST00000269305	7	HNSC	1	TP53	173 vs 294	ENST00000269305	7	4	0.4242	2.2533	0.4835	0.8834	0.6217
PIK3CA:1043:01:ENST00000263967	7	UCEC	1	PIK3CA	1043 vs 111	ENST00000263967	7	4	0.4242	NA	0.9996	0.9836	0.8555
TP53:132:01:ENST00000269305	6	OV	1	TP53	132 vs 176	ENST00000269305	6	8	0.4262	1.8372	0.407	0.5794	0.2747
TP53:175:01:ENST00000269305	5	PAAD	1	TP53	175 vs 248	ENST00000269305	5	10	0.4282	0.5393	0.4417	0.9966	0.9346
PTEN:268:01:ENST00000371953	8	UCEC	1	PTEN	268 vs 70	ENST00000371953	8	6	0.4282	0	0.9996	0.6345	0.3414
TP53:187:01:ENST00000269305	5	BRCA	1	TP53	187 vs 245	ENST00000269305	5	5	0.4286	0	0.9996	0.1984	0.0684
TP53:242:01:ENST00000269305	5	BRCA	1	TP53	242 vs 282	ENST00000269305	5	5	0.4286	0.362	0.4265	0.7561	0.4568
TP53:278:01:ENST00000269305	4	BRCA	1	TP53	278 vs 285	ENST00000269305	4	4	0.4286	0	0.9994	0.075	0.0098
APC:1408:01:ENST00000257430	4	COAD	1	APC	1408 vs 1429	ENST00000257430	4	4	0.4286	2.8103	0.4031	0.5536	0.2675
APC:1408:01:ENST00000257430	4	COAD	1	APC	1408 vs 1489	ENST00000257430	4	4	0.4286	NA	0.9994	0.9981	0.9511
APC:1408:01:ENST00000257430	4	COAD	1	APC	1408 vs 554	ENST00000257430	4	4	0.4286	2.8103	0.4031	0.8782	0.6001
APC:1408:01:ENST00000257430	4	COAD	1	APC	1408 vs 941	ENST00000257430	4	4	0.4286	NA	0.9994	0.1449	0.02
TP53:132:01:ENST00000269305	4	COAD	1	TP53	132 vs 331	ENST00000269305	4	4	0.4286	2.8016	0.3772	0.266	0.0514
TP53:187:01:ENST00000269305	4	ESCA	1	TP53	187 vs 282	ENST00000269305	4	4	0.4286	0	0.9994	0.9851	0.8635
HRAS:12:01:ENST00000311189	11	HNSC	1	HRAS	12 vs 13	ENST00000311189	11	10	0.4286	0.4584	0.3683	0.4094	0.1923
TP53:125:01:ENST00000269305	4	HNSC	1	TP53	125 vs 236	ENST00000269305	4	4	0.4286	NA	0.9994	0.9637	0.7866
TP53:125:01:ENST00000269305	4	HNSC	1	TP53	125 vs 283	ENST00000269305	4	4	0.4286	2.8103	0.4031	0.6619	0.3677
TP53:125:01:ENST00000269305	4	HNSC	1	TP53	125 vs 294	ENST00000269305	4	4	0.4286	2.8103	0.4031	0.9977	0.9458
TP53:151:01:ENST00000269305	5	HNSC	1	TP53	151 vs 32	ENST00000269305	5	4	0.4286	0.5018	0.4029	0.8961	0.6462
TP53:157:01:ENST00000269305	4	HNSC	1	TP53	157 vs 280	ENST00000269305	4	5	0.4286	0.3516	0.3658	0.7498	0.4472
TP53:157:01:ENST00000269305	4	HNSC	1	TP53	157 vs 337	ENST00000269305	4	5	0.4286	0.342	0.3851	0.681	0.3677
TP53:175:01:ENST00000269305	12	HNSC	1	TP53	175 vs 278	ENST00000269305	12	4	0.4286	2.2811	0.4415	0.9961	0.9295
TP53:176:01:ENST00000269305	6	HNSC	1	TP53	176 vs 224	ENST00000269305	6	4	0.4286	0.4274	0.3969	0.6624	0.3855
TP53:294:01:ENST00000269305	4	HNSC	1	TP53	294 vs 307	ENST00000269305	4	4	0.4286	0.3558	0.4031	0.1785	0.0319
TP53:152:01:ENST00000269305	4	LUAD	1	TP53	152 vs 248	ENST00000269305	4	4	0.4286	NA	0.9996	0.8435	0.5646
TP53:105:01:ENST00000269305	5	LUSC	1	TP53	105 vs 307	ENST00000269305	5	5	0.4286	2.0798	0.4254	0.9266	0.6985
TP53:126:01:ENST00000269305	6	LUSC	1	TP53	126 vs 135	ENST00000269305	6	4	0.4286	2.5369	0.4261	0.9661	0.7919
TP53:135:01:ENST00000269305	4	LUSC	1	TP53	135 vs 242	ENST00000269305	4	5	0.4286	NA	0.9996	0.5295	0.27
TP53:172:01:ENST00000269305	4	LUSC	1	TP53	172 vs 214	ENST00000269305	4	4	0.4286	0	0.9996	0.9965	0.9335
TP53:172:01:ENST00000269305	4	LUSC	1	TP53	172 vs 298	ENST00000269305	4	4	0.4286	0	0.9994	0.4372	0.1818
TP53:214:01:ENST00000269305	4	LUSC	1	TP53	214 vs 225	ENST00000269305	4	4	0.4286	NA	0.9996	0.6923	0.3958
TP53:306:01:ENST00000269305	4	OV	1	TP53	306 vs 342	ENST00000269305	4	4	0.4286	2.2402	0.3578	1	1
PCLO:4044:06:ENST00000333891	4	SKCM	6	PCLO	4044 vs 4133	ENST00000333891	4	5	0.4286	0.352	0.371	0.5794	0.3048
CTCF:318:01:ENST00000264010	4	UCEC	1	CTCF	318 vs 48	ENST00000264010	4	4	0.4286	NA	0.9996	0.6923	0.3958
FBXW7:545:01:ENST00000281708	4	UCEC	1	FBXW7	545 vs 689	ENST00000281708	4	4	0.4286	2.8103	0.4031	0.1186	0.0319
PTEN:27:01:ENST00000371953	4	UCEC	1	PTEN	27 vs 7	ENST00000371953	4	4	0.4286	NA	0.9996	0.2785	0.1159
TP53:125:01:ENST00000269305	7	LUSC	1	TP53	125 vs 159	ENST00000269305	7	4	0.4303	0	0.9994	0.5697	0.3151
TP53:158:01:ENST00000269305	16	LUSC	1	TP53	158 vs 187	ENST00000269305	16	5	0.4303	0.4214	0.3263	0.379	0.2075
TP53:163:01:ENST00000269305	7	LUSC	1	TP53	163 vs 298	ENST00000269305	7	4	0.4303	0.2917	0.3152	0.403	0.1482
TP53:213:01:ENST00000269305	11	HNSC	1	TP53	213 vs 283	ENST00000269305	11	4	0.4322	2.2941	0.4492	0.8456	0.5709
TP53:273:01:ENST00000269305	19	OV	1	TP53	273 vs 331	ENST00000269305	19	7	0.4327	0.4582	0.2866	0.0747	0.0444
TP53:248:01:ENST00000269305	21	OV	1	TP53	248 vs 261	ENST00000269305	21	4	0.433	1.5024	0.5335	0.8827	0.5982
TP53:220:01:ENST00000269305	5	HNSC	1	TP53	220 vs 245	ENST00000269305	5	9	0.4336	0	0.9994	0.9348	0.7673
TP53:195:01:ENST00000269305	12	OV	1	TP53	195 vs 273	ENST00000269305	12	19	0.4347	1.585	0.3809	0.4001	0.1907
TP53:248:01:ENST00000269305	8	BRCA	1	TP53	248 vs 273	ENST00000269305	8	20	0.4357	2.2452	0.383	0.6053	0.3349
TP53:132:01:ENST00000269305	6	OV	1	TP53	132 vs 220	ENST00000269305	6	8	0.4362	1.7864	0.419	0.9679	0.8005
TP53:196:01:ENST00000269305	8	HNSC	1	TP53	196 vs 224	ENST00000269305	8	4	0.4364	0.4569	0.4008	0.993	0.9064
VHL:130:01:ENST00000256474	4	KIRC	1	VHL	130 vs 158	ENST00000256474	4	7	0.4364	0.4165	0.4343	0.3873	0.168
TP53:193:01:ENST00000269305	5	LUAD	1	TP53	193 vs 286	ENST00000269305	5	5	0.4365	0	0.9995	0.2353	0.0902
TP53:126:01:ENST00000269305	6	LUSC	1	TP53	126 vs 244	ENST00000269305	6	6	0.4372	1.9728	0.4233	0.8527	0.5832
TP53:132:01:ENST00000269305	6	OV	1	TP53	132 vs 278	ENST00000269305	6	6	0.4372	1.8327	0.431	0.902	0.6535
TP53:175:01:ENST00000269305	19	BRCA	1	TP53	175 vs 220	ENST00000269305	19	10	0.4374	2.5965	0.4146	0.2963	0.1096
TP53:193:01:ENST00000269305	5	OV	1	TP53	193 vs 195	ENST00000269305	5	12	0.4376	0.5924	0.4839	0.4895	0.2189
SPOP:102:01:ENST00000347630	8	PRAD	1	SPOP	102 vs 133	ENST00000347630	8	19	0.4379	NA	0.9996	1	0.9949
TP53:105:01:ENST00000269305	5	LUSC	1	TP53	105 vs 175	ENST00000269305	5	8	0.4382	0.5341	0.4311	0.8867	0.6084
TP53:220:01:ENST00000269305	10	BRCA	1	TP53	220 vs 273	ENST00000269305	10	20	0.4384	0.4086	0.4269	0.5722	0.2818
APC:1114:01:ENST00000257430	7	COAD	1	APC	1114 vs 1556	ENST00000257430	7	9	0.4385	0	0.9994	0.5164	0.2576
TP53:163:01:ENST00000269305	9	OV	1	TP53	163 vs 275	ENST00000269305	9	4	0.4392	1.9018	0.464	0.3285	0.1255
TP53:154:01:ENST00000269305	7	LUSC	1	TP53	154 vs 244	ENST00000269305	7	6	0.4406	0.4791	0.4349	0.7711	0.4712
TP53:278:01:ENST00000269305	6	OV	1	TP53	278 vs 331	ENST00000269305	6	7	0.4406	0.4573	0.4011	0.3986	0.1805
TP53:220:01:ENST00000269305	7	UCEC	1	TP53	220 vs 282	ENST00000269305	7	5	0.4419	0	0.9996	0.8797	0.6153
PTEN:136:01:ENST00000371953	7	UCEC	1	PTEN	136 vs 323	ENST00000371953	7	10	0.4423	2.8913	0.3892	0.4476	0.224
TP53:126:01:ENST00000269305	7	BRCA	1	TP53	126 vs 173	ENST00000269305	7	4	0.4424	0.2887	0.3809	0.7087	0.4481
TP53:126:01:ENST00000269305	7	BRCA	1	TP53	126 vs 194	ENST00000269305	7	4	0.4424	0.2887	0.3809	0.8394	0.5871
TP53:213:01:ENST00000269305	5	LGG	1	TP53	213 vs 220	ENST00000269305	5	9	0.4436	3.4641	0.3809	0.4309	0.2203
PTEN:136:01:ENST00000371953	7	UCEC	1	PTEN	136 vs 290	ENST00000371953	7	6	0.4441	NA	0.9994	0.8218	0.5299
TP53:225:01:ENST00000269305	5	BRCA	1	TP53	225 vs 282	ENST00000269305	5	5	0.4444	0	0.9994	0.9985	0.956
TP53:280:01:ENST00000269305	5	BRCA	1	TP53	280 vs 282	ENST00000269305	5	5	0.4444	0	0.9994	0.9425	0.7303
TP53:282:01:ENST00000269305	5	BRCA	1	TP53	282 vs 331	ENST00000269305	5	5	0.4444	NA	0.9994	0.8617	0.5895
TP53:126:01:ENST00000269305	5	LIHC	1	TP53	126 vs 248	ENST00000269305	5	5	0.4444	NA	0.9994	0.1726	0.0532
TP53:238:01:ENST00000269305	5	OV	1	TP53	238 vs 307	ENST00000269305	5	4	0.4444	3.7064	0.292	0.2474	0.0469
ARID1A:1989:01:ENST00000324856	5	UCEC	1	ARID1A	1989 vs 766	ENST00000324856	5	5	0.4444	0	0.9996	0.9016	0.651
PIK3R1:376:01:ENST00000521381	4	UCEC	1	PIK3R1	376 vs 642	ENST00000521381	4	5	0.4444	NA	0.9996	0.7684	0.4583
PTEN:157:01:ENST00000371953	4	UCEC	1	PTEN	157 vs 343	ENST00000371953	4	5	0.4444	NA	0.9996	0.7998	0.4949
TP53:244:01:ENST00000269305	6	LUSC	1	TP53	244 vs 282	ENST00000269305	6	6	0.4459	1.9661	0.4627	0.8438	0.5591
TP53:248:01:ENST00000269305	6	UCS	1	TP53	248 vs 273	ENST00000269305	6	4	0.4476	NA	0.9992	0.0146	0.0024
TP53:126:01:ENST00000269305	6	LUSC	1	TP53	126 vs 187	ENST00000269305	6	6	0.4481	1.8935	0.4465	0.9064	0.664
APC:302:01:ENST00000257430	5	COAD	1	APC	302 vs 935	ENST00000257430	5	9	0.4486	1.9251	0.4802	0.8854	0.6292
PIK3CA:1043:01:ENST00000263967	7	UCEC	1	PIK3CA	1043 vs 542	ENST00000263967	7	22	0.4486	3.3764	0.3904	0.6242	0.3141
TP53:125:01:ENST00000269305	7	LUSC	1	TP53	125 vs 193	ENST00000269305	7	7	0.4493	0	0.9996	0.4741	0.2263
TP53:125:01:ENST00000269305	7	LUSC	1	TP53	125 vs 245	ENST00000269305	7	14	0.4504	0.4159	0.4242	0.8458	0.5679
TP53:195:01:ENST00000269305	12	OV	1	TP53	195 vs 238	ENST00000269305	12	5	0.4505	0.4197	0.345	0.7911	0.5085
TP53:175:01:ENST00000269305	8	LUSC	1	TP53	175 vs 266	ENST00000269305	8	5	0.4507	1.8645	0.4763	0.9802	0.865
TP53:196:01:ENST00000269305	8	BRCA	1	TP53	196 vs 220	ENST00000269305	8	10	0.451	0	0.9994	0.997	0.9381
APC:1414:01:ENST00000257430	7	COAD	1	APC	1414 vs 876	ENST00000257430	6	11	0.4515	0.4778	0.5234	0.9683	0.7991
TP53:163:01:ENST00000269305	9	OV	1	TP53	163 vs 195	ENST00000269305	9	12	0.4522	1.6133	0.4527	0.9933	0.9077
APC:302:01:ENST00000257430	5	COAD	1	APC	302 vs 805	ENST00000257430	5	5	0.4524	2.8103	0.4031	0.8537	0.57
TP53:151:01:ENST00000269305	5	HNSC	1	TP53	151 vs 175	ENST00000269305	5	12	0.4525	1.6556	0.4316	0.995	0.9205
PIK3CA:1043:01:ENST00000263967	7	UCEC	1	PIK3CA	1043 vs 545	ENST00000263967	7	26	0.4529	2.155	0.5307	0.7553	0.4377
TP53:245:01:ENST00000269305	9	HNSC	1	TP53	245 vs 331	ENST00000269305	9	4	0.4531	0.5109	0.465	0.6845	0.3419
TP53:193:01:ENST00000269305	9	HNSC	1	TP53	193 vs 280	ENST00000269305	9	5	0.4535	1.7083	0.4527	0.8187	0.5239
TP53:273:01:ENST00000269305	12	HNSC	1	TP53	273 vs 278	ENST00000269305	12	4	0.4538	2.2222	0.4564	0.9982	0.9523
PIK3CA:38:01:ENST00000263967	10	UCEC	1	PIK3CA	38 vs 420	ENST00000263967	10	7	0.4541	NA	0.9991	0.0237	0.0073
TP53:275:01:ENST00000269305	4	OV	1	TP53	275 vs 331	ENST00000269305	4	7	0.4545	0.4001	0.4296	0.0742	0.0094
DNAH5:3236:06:ENST00000265104	6	SKCM	6	DNAH5	3236 vs 920	ENST00000265104	6	5	0.4545	1.9955	0.3894	0.2366	0.0584
PTEN:136:01:ENST00000371953	7	UCEC	1	PTEN	136 vs 16	ENST00000371953	7	4	0.4545	NA	0.9994	0.9662	0.7936
KRAS:12:01:ENST00000256078	36	READ	1	KRAS	12 vs 13	ENST00000256078	34	7	0.4546	0.5767	0.5214	0.9877	0.8758
TP53:163:01:ENST00000269305	7	LUSC	1	TP53	163 vs 234	ENST00000269305	7	9	0.4561	0.3866	0.389	0.0297	0.0078
TP53:195:01:ENST00000269305	12	OV	1	TP53	195 vs 245	ENST00000269305	12	8	0.4566	1.6744	0.4709	0.999	0.9644
TP53:159:01:ENST00000269305	4	LUAD	1	TP53	159 vs 163	ENST00000269305	4	4	0.4571	2.5369	0.4261	0.2231	0.0414
TP53:281:01:ENST00000269305	4	OV	1	TP53	281 vs 306	ENST00000269305	4	4	0.4571	0.3933	0.4203	0.2921	0.0584
TP53:172:01:ENST00000269305	4	LUSC	1	TP53	172 vs 245	ENST00000269305	4	14	0.4575	0	0.999	0.6987	0.4162
KRAS:12:01:ENST00000256078	94	COAD	1	KRAS	12 vs 13	ENST00000256078	94	29	0.4581	0.7316	0.4556	0.9986	0.9576
TP53:152:01:ENST00000269305	5	STAD	1	TP53	152 vs 175	ENST00000269305	5	11	0.4583	0	0.9996	0.1858	0.0584
TP53:176:01:ENST00000269305	6	HNSC	1	TP53	176 vs 273	ENST00000269305	6	12	0.4586	0.544	0.4488	0.9631	0.7826
TP53:220:01:ENST00000269305	9	LGG	1	TP53	220 vs 280	ENST00000269305	9	4	0.4587	0.4503	0.5009	0.2668	0.0788
TP53:176:01:ENST00000269305	6	HNSC	1	TP53	176 vs 280	ENST00000269305	6	5	0.4589	0.4631	0.4023	0.9901	0.8879
TP53:196:01:ENST00000269305	5	LGG	1	TP53	196 vs 245	ENST00000269305	5	6	0.4589	2.8184	0.3983	0.8855	0.6435
TP53:126:01:ENST00000269305	6	LUSC	1	TP53	126 vs 220	ENST00000269305	6	5	0.4589	1.8203	0.439	0.6553	0.3616
TP53:244:01:ENST00000269305	6	LUSC	1	TP53	244 vs 266	ENST00000269305	6	5	0.4589	2.4857	0.4323	0.9409	0.7285
TP53:193:01:ENST00000269305	5	OV	1	TP53	193 vs 241	ENST00000269305	5	6	0.4589	0.55	0.4426	0.9478	0.7402
PIK3CA:345:01:ENST00000263967	8	UCEC	1	PIK3CA	345 vs 545	ENST00000263967	8	26	0.4602	2.1151	0.5428	0.6332	0.3616
TP53:152:01:ENST00000269305	4	LUAD	1	TP53	152 vs 157	ENST00000269305	4	5	0.4603	NA	0.9994	0.0235	0.0055
TP53:214:01:ENST00000269305	4	LUSC	1	TP53	214 vs 242	ENST00000269305	4	5	0.4603	NA	0.9996	0.6057	0.3249
TP53:245:01:ENST00000269305	4	PAAD	1	TP53	245 vs 273	ENST00000269305	4	5	0.4603	2.0798	0.4254	0.9948	0.9178
TP53:179:01:ENST00000269305	9	LGG	1	TP53	179 vs 196	ENST00000269305	9	5	0.4605	2.8432	0.4158	0.1907	0.0504
TP53:271:01:ENST00000269305	4	BLCA	1	TP53	271 vs 273	ENST00000269305	4	7	0.4606	1.8567	0.4234	0.4699	0.1207
PIK3CA:345:01:ENST00000263967	8	UCEC	1	PIK3CA	345 vs 93	ENST00000263967	8	8	0.4606	NA	0.9996	0.3525	0.1545
TP53:245:01:ENST00000269305	14	LUSC	1	TP53	245 vs 278	ENST00000269305	14	10	0.4609	1.8238	0.4739	0.9674	0.797
PIK3CA:1043:01:ENST00000263967	7	UCEC	1	PIK3CA	1043 vs 118	ENST00000263967	7	9	0.4614	0.4223	0.4568	0.9721	0.8113
CDH1:23:01:ENST00000261769	9	BRCA	1	CDH1	23 vs 63	ENST00000261769	9	4	0.4615	0	0.9996	0.874	0.5968
PTEN:173:01:ENST00000371953	7	UCEC	1	PTEN	173 vs 212	ENST00000371953	7	7	0.4615	NA	0.9996	0.4367	0.1912
APC:232:01:ENST00000257430	5	COAD	1	APC	232 vs 935	ENST00000257430	5	9	0.4635	0	0.9991	0.3752	0.18
TP53:125:01:ENST00000269305	4	HNSC	1	TP53	125 vs 193	ENST00000269305	4	9	0.4643	0.5665	0.4835	0.8174	0.5221
TP53:125:01:ENST00000269305	4	LGG	1	TP53	125 vs 179	ENST00000269305	4	9	0.4643	1.9375	0.5183	0.6741	0.3383
TP53:158:01:ENST00000269305	4	LGG	1	TP53	158 vs 179	ENST00000269305	4	9	0.4643	2.6458	0.4923	0.9703	0.8076
PIK3CA:1021:01:ENST00000263967	4	UCEC	1	PIK3CA	1021 vs 345	ENST00000263967	4	8	0.4646	0	0.9996	0.9523	0.7535
TP53:132:01:ENST00000269305	6	OV	1	TP53	132 vs 195	ENST00000269305	6	12	0.4658	1.6367	0.4667	0.9378	0.7149
TP53:248:01:ENST00000269305	14	ESCA	1	TP53	248 vs 282	ENST00000269305	14	4	0.4667	0.4734	0.3738	0.3009	0.1782
ATRX:1302:01:ENST00000373344	4	LGG	1	ATRX	1302 vs 1426	ENST00000373344	4	6	0.4667	NA	0.9996	0.9925	0.9026
TP53:154:01:ENST00000269305	7	LUSC	1	TP53	154 vs 298	ENST00000269305	7	4	0.4667	0.4704	0.4518	0.7368	0.4086
PTEN:27:01:ENST00000371953	4	UCEC	1	PTEN	27 vs 70	ENST00000371953	4	6	0.4667	2.4495	0.5285	0.849	0.575
TP53:193:01:ENST00000269305	9	HNSC	1	TP53	193 vs 224	ENST00000269305	9	4	0.4671	1.7793	0.4767	0.5054	0.2568
APC:1414:01:ENST00000257430	7	COAD	1	APC	1414 vs 1556	ENST00000257430	6	9	0.4675	0.4096	0.4472	0.9927	0.9039
TP53:192:01:ENST00000269305	5	OV	1	TP53	192 vs 241	ENST00000269305	5	6	0.4675	0.4445	0.4707	0.2358	0.0851
PIK3CA:118:01:ENST00000263967	9	UCEC	1	PIK3CA	118 vs 345	ENST00000263967	9	7	0.4685	2.3431	0.4623	0.8518	0.5719
PTEN:27:01:ENST00000371953	4	UCEC	1	PTEN	27 vs 323	ENST00000371953	4	11	0.4689	3.1623	0.4158	0.2142	0.1188
TP53:179:01:ENST00000269305	8	BRCA	1	TP53	179 vs 187	ENST00000269305	8	5	0.4693	NA	NA	0.0159	0.0028
PTEN:136:01:ENST00000371953	7	UCEC	1	PTEN	136 vs 343	ENST00000371953	7	5	0.4697	NA	0.9994	0.9405	0.7258
TP53:175:01:ENST00000269305	8	LUSC	1	TP53	175 vs 176	ENST00000269305	8	5	0.4709	0.6097	0.4638	0.3476	0.0751
TP53:220:01:ENST00000269305	5	GBM	1	TP53	220 vs 282	ENST00000269305	5	6	0.4719	0.6037	0.4943	0.4185	0.1134
TP53:179:01:ENST00000269305	9	LUSC	1	TP53	179 vs 282	ENST00000269305	9	6	0.4723	0.5543	0.4798	0.8845	0.6278
TP53:175:01:ENST00000269305	12	HNSC	1	TP53	175 vs 294	ENST00000269305	12	4	0.4725	2.2862	0.4442	0.2084	0.103
TP53:159:01:ENST00000269305	4	BLCA	1	TP53	159 vs 248	ENST00000269305	4	22	0.4728	0.633	0.5482	0.9283	0.7076
TP53:175:01:ENST00000269305	8	UCEC	1	TP53	175 vs 241	ENST00000269305	8	9	0.4747	2.2753	0.4824	0.4416	0.1972
TP53:195:01:ENST00000269305	12	OV	1	TP53	195 vs 331	ENST00000269305	12	7	0.4748	0.5399	0.4272	0.8024	0.5174
TP53:193:01:ENST00000269305	5	OV	1	TP53	193 vs 220	ENST00000269305	5	8	0.4755	0.5765	0.4759	0.8994	0.644
TP53:224:01:ENST00000269305	4	HNSC	1	TP53	224 vs 248	ENST00000269305	4	13	0.4756	2.0289	0.4019	0.7657	0.4917
TP53:151:01:ENST00000269305	5	HNSC	1	TP53	151 vs 213	ENST00000269305	5	11	0.4757	1.662	0.4564	0.9368	0.7113
PIK3CA:111:01:ENST00000263967	5	BRCA	1	PIK3CA	111 vs 118	ENST00000263967	5	5	0.4762	0	0.9996	0.5152	0.2494
TP53:110:01:ENST00000269305	5	BRCA	1	TP53	110 vs 242	ENST00000269305	5	5	0.4762	0	0.9996	0.7952	0.5
TP53:132:01:ENST00000269305	5	BRCA	1	TP53	132 vs 245	ENST00000269305	5	5	0.4762	0	0.9996	0.1984	0.0684
TP53:280:01:ENST00000269305	5	HNSC	1	TP53	280 vs 294	ENST00000269305	5	4	0.4762	2.6475	0.4043	0.3744	0.1604
TP53:298:01:ENST00000269305	5	HNSC	1	TP53	298 vs 331	ENST00000269305	5	4	0.4762	1.9708	0.4393	1	1
TP53:214:01:ENST00000269305	4	LUSC	1	TP53	214 vs 307	ENST00000269305	4	5	0.4762	NA	0.9994	0.0235	0.0055
TP53:179:01:ENST00000269305	5	OV	1	TP53	179 vs 281	ENST00000269305	5	4	0.4762	0.3651	0.4767	0.2078	0.0857
TP53:192:01:ENST00000269305	5	OV	1	TP53	192 vs 306	ENST00000269305	5	4	0.4762	0.4293	0.4674	0.1706	0.0244
NFE2L2:34:01:ENST00000397062	6	UCEC	1	NFE2L2	34 vs 82	ENST00000397062	6	4	0.4762	0.3904	0.4482	0.4862	0.2027
TP53:193:01:ENST00000269305	4	UCEC	1	TP53	193 vs 282	ENST00000269305	4	5	0.4762	0	0.9996	0.0511	0.0063
PTEN:173:01:ENST00000371953	7	UCEC	1	PTEN	173 vs 233	ENST00000371953	7	23	0.4764	1.9151	0.5961	0.784	0.4988
TP53:175:01:ENST00000269305	12	HNSC	1	TP53	175 vs 196	ENST00000269305	12	8	0.4769	1.6418	0.4748	0.8978	0.6459
APC:1397:01:ENST00000257430	6	COAD	1	APC	1397 vs 1414	ENST00000257430	6	6	0.4784	2.4776	0.4602	0.9912	0.8938
TP53:163:01:ENST00000269305	9	OV	1	TP53	163 vs 266	ENST00000269305	9	5	0.4785	0.6399	0.4848	0.3916	0.088
TP53:175:01:ENST00000269305	8	LUSC	1	TP53	175 vs 220	ENST00000269305	8	5	0.4786	0.5904	0.4638	0.8423	0.5331
TP53:157:01:ENST00000269305	14	LUSC	1	TP53	157 vs 245	ENST00000269305	14	14	0.4787	1.5308	0.4855	0.8085	0.517
TP53:196:01:ENST00000269305	5	LGG	1	TP53	196 vs 220	ENST00000269305	5	9	0.4795	2.3774	0.4802	0.4726	0.1996
TP53:192:01:ENST00000269305	5	OV	1	TP53	192 vs 331	ENST00000269305	5	7	0.4798	0.4218	0.4558	0.9424	0.7299
TP53:273:01:ENST00000269305	20	BRCA	1	TP53	273 vs 278	ENST00000269305	20	4	0.48	NA	0.9992	0.8051	0.5269
TP53:159:01:ENST00000269305	4	LUSC	1	TP53	159 vs 175	ENST00000269305	4	8	0.4808	0.4532	0.4795	0.9027	0.6757
APC:1408:01:ENST00000257430	4	COAD	1	APC	1408 vs 1556	ENST00000257430	4	9	0.4811	1.9803	0.4595	0.7453	0.4143
TP53:213:01:ENST00000269305	11	HNSC	1	TP53	213 vs 298	ENST00000269305	11	5	0.4817	0.6147	0.469	0.9988	0.9602
PIK3CA:1047:01:ENST00000263967	41	UCEC	1	PIK3CA	1047 vs 93	ENST00000263967	41	8	0.4819	NA	0.9991	0.8654	0.5837
TP53:245:01:ENST00000269305	14	LUSC	1	TP53	245 vs 298	ENST00000269305	14	4	0.4824	0.5406	0.4646	0.6072	0.2764
TP53:110:01:ENST00000269305	5	HNSC	1	TP53	110 vs 245	ENST00000269305	5	9	0.4825	1.8476	0.5057	0.9346	0.6723
TP53:157:01:ENST00000269305	5	OV	1	TP53	157 vs 248	ENST00000269305	5	21	0.4832	0.6017	0.5059	0.8451	0.5748
TP53:298:01:ENST00000269305	5	HNSC	1	TP53	298 vs 337	ENST00000269305	5	5	0.4841	1.7905	0.5025	0.3214	0.0663
TP53:176:01:ENST00000269305	5	STAD	1	TP53	176 vs 261	ENST00000269305	5	5	0.4841	0.535	0.4572	0.3679	0.0959
TP53:248:01:ENST00000269305	21	OV	1	TP53	248 vs 307	ENST00000269305	21	4	0.4844	1.3621	0.5974	0.3242	0.0485
CTNNB1:33:01:ENST00000349496	12	LIHC	1	CTNNB1	33 vs 335	ENST00000349496	12	4	0.4846	0.5004	0.4284	0.7903	0.5143
APC:1378:01:ENST00000257430	6	COAD	1	APC	1378 vs 302	ENST00000257430	6	5	0.4848	0.3684	0.4195	0.9982	0.9524
APC:1397:01:ENST00000257430	6	COAD	1	APC	1397 vs 302	ENST00000257430	6	5	0.4848	0.3367	0.3768	0.9403	0.7271
TP53:196:01:ENST00000269305	8	HNSC	1	TP53	196 vs 236	ENST00000269305	8	4	0.4848	NA	0.9994	0.9583	0.7689
TP53:135:01:ENST00000269305	4	LUSC	1	TP53	135 vs 331	ENST00000269305	4	7	0.4848	3.1623	0.4188	0.8294	0.5182
TP53:179:01:ENST00000269305	4	UCEC	1	TP53	179 vs 220	ENST00000269305	4	7	0.4848	NA	0.9996	0.9872	0.8718
TP53:159:01:ENST00000269305	4	BLCA	1	TP53	159 vs 271	ENST00000269305	4	4	0.4857	0.502	0.4541	0.5258	0.1613
TP53:135:01:ENST00000269305	4	BRCA	1	TP53	135 vs 157	ENST00000269305	4	4	0.4857	NA	0.9996	0.5777	0.2935
TP53:135:01:ENST00000269305	4	BRCA	1	TP53	135 vs 238	ENST00000269305	4	4	0.4857	NA	0.9996	0.1706	0.0596
APC:1429:01:ENST00000257430	4	COAD	1	APC	1429 vs 941	ENST00000257430	4	4	0.4857	NA	0.9996	0.7424	0.4355
TP53:176:01:ENST00000269305	4	ESCA	1	TP53	176 vs 282	ENST00000269305	4	4	0.4857	0.3047	0.344	0.3456	0.1711
TP53:157:01:ENST00000269305	4	HNSC	1	TP53	157 vs 331	ENST00000269305	4	4	0.4857	0.362	0.4265	0.7562	0.4413
TP53:224:01:ENST00000269305	4	HNSC	1	TP53	224 vs 32	ENST00000269305	4	4	0.4857	0.5315	0.493	0.9949	0.9192
TP53:307:01:ENST00000269305	4	HNSC	1	TP53	307 vs 32	ENST00000269305	4	4	0.4857	0.502	0.4541	0.3679	0.1383
TP53:275:01:ENST00000269305	4	LGG	1	TP53	275 vs 280	ENST00000269305	4	4	0.4857	NA	0.9996	0.2941	0.1226
TP53:275:01:ENST00000269305	4	OV	1	TP53	275 vs 342	ENST00000269305	4	4	0.4857	0.5399	0.4817	0.6065	0.239
PTPRT:1266:06:ENST00000373187	4	SKCM	6	PTPRT	1266 vs 695	ENST00000373187	4	4	0.4857	2.5616	0.4482	0.9996	0.977
PIK3R1:376:01:ENST00000521381	4	UCEC	1	PIK3R1	376 vs 567	ENST00000521381	4	4	0.4857	NA	0.9996	0.5777	0.2935
APC:1414:01:ENST00000257430	7	COAD	1	APC	1414 vs 935	ENST00000257430	6	9	0.4859	0.4351	0.4725	0.6637	0.3597
TP53:248:01:ENST00000269305	13	HNSC	1	TP53	248 vs 283	ENST00000269305	13	4	0.4866	2.1234	0.487	0.8992	0.6361
TP53:125:01:ENST00000269305	7	LUSC	1	TP53	125 vs 331	ENST00000269305	7	7	0.4878	0	0.9996	0.3857	0.1701
TP53:175:01:ENST00000269305	11	ESCA	1	TP53	175 vs 187	ENST00000269305	11	4	0.4879	0.378	0.5393	0.9985	0.9567
TP53:248:01:ENST00000269305	8	BRCA	1	TP53	248 vs 282	ENST00000269305	8	5	0.488	0.329	0.3644	0.9605	0.7788
TP53:248:01:ENST00000269305	13	HNSC	1	TP53	248 vs 280	ENST00000269305	13	5	0.4888	0.5653	0.438	0.9556	0.7592
TP53:282:01:ENST00000269305	6	LUSC	1	TP53	282 vs 307	ENST00000269305	6	5	0.4892	1.9333	0.4778	0.4985	0.2518
TP53:193:01:ENST00000269305	5	OV	1	TP53	193 vs 245	ENST00000269305	5	8	0.4895	0.5426	0.4672	0.7457	0.4385
TP53:151:01:ENST00000269305	5	HNSC	1	TP53	151 vs 173	ENST00000269305	5	7	0.4899	1.6677	0.5044	0.789	0.4788
PIK3R1:564:01:ENST00000521381	6	UCEC	1	PIK3R1	564 vs 582	ENST00000521381	6	12	0.4902	2.2497	0.5247	0.0027	0.0001
TP53:248:01:ENST00000269305	13	HNSC	1	TP53	248 vs 278	ENST00000269305	13	4	0.4908	2.0809	0.4989	0.9221	0.6802
TP53:157:01:ENST00000269305	4	HNSC	1	TP53	157 vs 173	ENST00000269305	4	7	0.4909	0.4476	0.4956	1	0.9969
TP53:125:01:ENST00000269305	7	LUSC	1	TP53	125 vs 154	ENST00000269305	7	7	0.4913	0.4092	0.467	0.582	0.2937
VHL:130:01:ENST00000256474	4	KIRC	1	VHL	130 vs 155	ENST00000256474	4	10	0.4915	0.4684	0.5167	0.9616	0.7779
PIK3CA:1047:01:ENST00000263967	129	BRCA	1	PIK3CA	1047 vs 345	ENST00000263967	129	16	0.4918	0.7251	0.5663	0.3629	0.1343
TP53:187:01:ENST00000269305	5	BRCA	1	TP53	187 vs 285	ENST00000269305	5	4	0.4921	0.3558	0.4031	0.1214	0.0162
TP53:176:01:ENST00000269305	5	COAD	1	TP53	176 vs 245	ENST00000269305	5	4	0.4921	NA	0.9994	0.8205	0.5243
TP53:110:01:ENST00000269305	5	HNSC	1	TP53	110 vs 125	ENST00000269305	5	4	0.4921	0.5565	0.561	0.6619	0.3677
TP53:224:01:ENST00000269305	4	HNSC	1	TP53	224 vs 337	ENST00000269305	4	5	0.4921	2.5324	0.4495	0.9999	0.9898
TP53:158:01:ENST00000269305	5	LUAD	1	TP53	158 vs 248	ENST00000269305	5	4	0.4921	NA	0.9994	0.5038	0.2428
TP53:159:01:ENST00000269305	4	LUAD	1	TP53	159 vs 273	ENST00000269305	4	5	0.4921	1.8815	0.493	0.2806	0.055
TP53:248:01:ENST00000269305	4	LUAD	1	TP53	248 vs 286	ENST00000269305	4	5	0.4921	0	0.9994	0.9982	0.9525
TP53:159:01:ENST00000269305	4	LUSC	1	TP53	159 vs 242	ENST00000269305	4	5	0.4921	NA	0.9996	0.6229	0.338
TP53:157:01:ENST00000269305	5	OV	1	TP53	157 vs 192	ENST00000269305	5	5	0.4921	2.4776	0.4602	0.7231	0.4158
TP53:213:01:ENST00000269305	4	PAAD	1	TP53	213 vs 273	ENST00000269305	4	5	0.4921	2.7509	0.4131	0.683	0.4021
TP53:179:01:ENST00000269305	4	STAD	1	TP53	179 vs 261	ENST00000269305	4	5	0.4921	0.4445	0.4707	0.1979	0.0361
PTEN:127:01:ENST00000371953	6	UCEC	1	PTEN	127 vs 57	ENST00000371953	5	4	0.4921	0.3904	0.4482	0.9955	0.9246
TP53:237:01:ENST00000269305	5	OV	1	TP53	237 vs 272	ENST00000269305	5	6	0.4935	1.987	0.4375	0.8358	0.5456
APC:876:01:ENST00000257430	12	COAD	1	APC	876 vs 941	ENST00000257430	12	4	0.4945	NA	0.9991	0.1107	0.0562
TP53:173:01:ENST00000269305	7	HNSC	1	TP53	173 vs 298	ENST00000269305	7	5	0.4949	0.6014	0.5079	0.7954	0.4855
TP53:192:01:ENST00000269305	4	BLCA	1	TP53	192 vs 285	ENST00000269305	4	10	0.4955	0.4717	0.5037	0.9724	0.812
TP53:132:01:ENST00000269305	6	OV	1	TP53	132 vs 245	ENST00000269305	6	8	0.4955	1.693	0.4987	0.9505	0.7473
TP53:248:01:ENST00000269305	22	BLCA	1	TP53	248 vs 273	ENST00000269305	22	7	0.4976	1.4392	0.5277	0.8924	0.627
TP53:132:01:ENST00000269305	6	OV	1	TP53	132 vs 266	ENST00000269305	6	5	0.4978	0.5764	0.4554	0.6873	0.2901
TP53:213:01:ENST00000269305	11	HNSC	1	TP53	213 vs 294	ENST00000269305	11	4	0.4982	2.1066	0.4991	0.4976	0.2619
PIK3CA:420:01:ENST00000263967	5	BRCA	1	PIK3CA	420 vs 453	ENST00000263967	5	5	0.5	0	0.9996	0.3165	0.1278
APC:1489:01:ENST00000257430	4	COAD	1	APC	1489 vs 213	ENST00000257430	4	12	0.5	0	0.9995	0.4731	0.208
APC:213:01:ENST00000257430	12	COAD	1	APC	213 vs 941	ENST00000257430	12	4	0.5	NA	0.9995	0.1824	0.0954
TP53:136:01:ENST00000269305	5	HNSC	1	TP53	136 vs 151	ENST00000269305	5	5	0.5	0.5426	0.4672	0.926	0.6913
TP53:152:01:ENST00000269305	5	STAD	1	TP53	152 vs 261	ENST00000269305	5	5	0.5	0.4309	0.4747	0.13	0.0175
PTEN:290:01:ENST00000371953	6	UCEC	1	PTEN	290 vs 70	ENST00000371953	6	6	0.5	0	0.9996	0.8715	0.6001
APC:1556:01:ENST00000257430	9	COAD	1	APC	1556 vs 302	ENST00000257430	9	4	0.5007	0.4271	0.3978	0.9996	0.9761
APC:1408:01:ENST00000257430	4	COAD	1	APC	1408 vs 876	ENST00000257430	4	12	0.5022	1.8115	0.4967	0.9657	0.7883
TP53:261:01:ENST00000269305	4	OV	1	TP53	261 vs 331	ENST00000269305	4	7	0.503	0.5559	0.541	0.5142	0.2293
PTEN:27:01:ENST00000371953	4	UCEC	1	PTEN	27 vs 92	ENST00000371953	4	7	0.503	2.8284	0.4689	0.94	0.7201
TP53:245:01:ENST00000269305	6	LGG	1	TP53	245 vs 282	ENST00000269305	6	7	0.5035	0.4383	0.5047	0.9992	0.9673
TP53:154:01:ENST00000269305	7	LUSC	1	TP53	154 vs 187	ENST00000269305	7	6	0.5035	0.5354	0.4973	0.8923	0.636
TP53:234:01:ENST00000269305	9	LUSC	1	TP53	234 vs 282	ENST00000269305	9	6	0.5035	1.6037	0.5024	0.3924	0.1712
TP53:192:01:ENST00000269305	5	OV	1	TP53	192 vs 195	ENST00000269305	5	12	0.5042	0.4813	0.5057	0.8255	0.5448
TP53:241:01:ENST00000269305	5	BLCA	1	TP53	241 vs 273	ENST00000269305	5	7	0.5051	0.5908	0.5047	0.5988	0.3005
TP53:179:01:ENST00000269305	8	HNSC	1	TP53	179 vs 248	ENST00000269305	8	13	0.5053	0.574	0.4973	0.9901	0.8882
TP53:132:01:ENST00000269305	4	COAD	1	TP53	132 vs 282	ENST00000269305	4	11	0.5055	1.7432	0.5179	0.1364	0.0112
TP53:195:01:ENST00000269305	12	OV	1	TP53	195 vs 220	ENST00000269305	12	8	0.5059	1.5253	0.5183	0.7452	0.4374
TP53:193:01:ENST00000269305	4	LGG	1	TP53	193 vs 220	ENST00000269305	4	9	0.5063	3.0551	0.4339	1	0.9972
TP53:105:01:ENST00000269305	5	LUSC	1	TP53	105 vs 278	ENST00000269305	5	10	0.5068	1.817	0.5239	0.2416	0.0655
TP53:278:01:ENST00000269305	4	HNSC	1	TP53	278 vs 280	ENST00000269305	4	5	0.5079	0.4107	0.4439	0.9588	0.7727
TP53:176:01:ENST00000269305	8	OV	1	TP53	176 vs 193	ENST00000269305	8	5	0.5082	1.6669	0.515	0.8035	0.5091
TP53:245:01:ENST00000269305	4	BLCA	1	TP53	245 vs 280	ENST00000269305	4	13	0.5084	0.5334	0.5757	0.9826	0.8502
TP53:213:01:ENST00000269305	6	STAD	1	TP53	213 vs 273	ENST00000269305	6	11	0.5089	1.6529	0.4977	0.8717	0.6086
APC:1114:01:ENST00000257430	7	COAD	1	APC	1114 vs 216	ENST00000257430	7	10	0.509	0	0.9994	0.87	0.5983
TP53:245:01:ENST00000269305	4	BLCA	1	TP53	245 vs 331	ENST00000269305	4	7	0.5091	0.4011	0.4798	0.3496	0.1452
PIK3CA:545:01:ENST00000263967	60	BRCA	1	PIK3CA	545 vs 726	ENST00000263967	60	6	0.5092	NA	0.9989	0.9847	0.8573
TP53:193:01:ENST00000269305	7	LUSC	1	TP53	193 vs 234	ENST00000269305	7	9	0.5096	0.4063	0.4212	0.0321	0.0082
CTCF:204:01:ENST00000264010	27	UCEC	1	CTCF	204 vs 448	ENST00000264010	27	5	0.5101	0.4794	0.5289	0.8029	0.5259
APC:1450:01:ENST00000257430	19	COAD	1	APC	1450 vs 499	ENST00000257430	19	6	0.5105	1.9892	0.5307	0.9931	0.9063
TP53:245:01:ENST00000269305	8	LUAD	1	TP53	245 vs 286	ENST00000269305	6	5	0.5108	0.4132	0.48	0.9052	0.655
TP53:175:01:ENST00000269305	11	STAD	1	TP53	175 vs 261	ENST00000269305	11	5	0.511	0.3934	0.472	0.0457	0.002
TP53:157:01:ENST00000269305	14	LUSC	1	TP53	157 vs 175	ENST00000269305	14	8	0.5114	0.6381	0.496	0.9999	0.9938
TP53:187:01:ENST00000269305	10	OV	1	TP53	187 vs 307	ENST00000269305	10	4	0.5115	1.4942	0.5498	0.4482	0.109
TP53:179:01:ENST00000269305	9	LGG	1	TP53	179 vs 237	ENST00000269305	9	4	0.5119	2.1821	0.5359	0.2456	0.0705
PIK3CA:1047:01:ENST00000263967	129	BRCA	1	PIK3CA	1047 vs 453	ENST00000263967	129	5	0.5124	0.4808	0.4834	0.9309	0.7111
TP53:234:01:ENST00000269305	9	LUSC	1	TP53	234 vs 248	ENST00000269305	9	10	0.5155	0.6242	0.4655	0.1043	0.0308
APC:1450:01:ENST00000257430	19	COAD	1	APC	1450 vs 302	ENST00000257430	19	4	0.5156	0.5666	0.4993	0.9138	0.6735
TP53:157:01:ENST00000269305	5	LUAD	1	TP53	157 vs 286	ENST00000269305	5	5	0.5159	0.4472	0.4411	0.1637	0.069
TP53:245:01:ENST00000269305	4	COAD	1	TP53	245 vs 273	ENST00000269305	4	19	0.517	0	0.9991	0.4217	0.2269
TP53:224:01:ENST00000269305	4	HNSC	1	TP53	224 vs 282	ENST00000269305	4	8	0.5172	2.0083	0.4241	0.5382	0.2956
APC:1489:01:ENST00000257430	4	COAD	1	APC	1489 vs 935	ENST00000257430	4	9	0.5175	0	0.9994	0.704	0.3877
TP53:157:01:ENST00000269305	5	OV	1	TP53	157 vs 187	ENST00000269305	5	10	0.5175	0.6018	0.5374	0.9464	0.7373
FBXW7:505:01:ENST00000281708	12	UCEC	1	FBXW7	505 vs 689	ENST00000281708	12	4	0.5176	0.3015	0.3986	0.364	0.1923
TP53:242:01:ENST00000269305	5	LUSC	1	TP53	242 vs 249	ENST00000269305	5	7	0.5177	2.1596	0.5367	0.9786	0.8346
TP53:175:01:ENST00000269305	12	HNSC	1	TP53	175 vs 298	ENST00000269305	12	5	0.5178	0.6501	0.4947	0.949	0.7535
CTNNB1:33:01:ENST00000349496	12	LIHC	1	CTNNB1	33 vs 41	ENST00000349496	12	6	0.5182	2.1131	0.4966	0.578	0.3106
TP53:248:01:ENST00000269305	15	UCEC	1	TP53	248 vs 273	ENST00000269305	15	21	0.5186	0.5845	0.511	0.8258	0.5393
TP53:234:01:ENST00000269305	5	OV	1	TP53	234 vs 272	ENST00000269305	5	6	0.5195	0.4386	0.4779	0.7356	0.4285
APC:1450:01:ENST00000257430	19	COAD	1	APC	1450 vs 941	ENST00000257430	19	4	0.5204	NA	0.9991	0.1912	0.1045
TP53:273:01:ENST00000269305	20	BRCA	1	TP53	273 vs 342	ENST00000269305	20	9	0.5205	NA	0.9992	0.1619	0.0735
TP53:125:01:ENST00000269305	7	LUSC	1	TP53	125 vs 172	ENST00000269305	7	4	0.5212	NA	0.9997	0.9974	0.9421
TP53:176:01:ENST00000269305	8	OV	1	TP53	176 vs 307	ENST00000269305	8	4	0.5212	0.6377	0.5292	0.4355	0.104
PTEN:136:01:ENST00000371953	7	UCEC	1	PTEN	136 vs 342	ENST00000371953	7	4	0.5212	2.3431	0.514	0.9585	0.7704
PIK3CA:108:01:ENST00000263967	6	UCEC	1	PIK3CA	108 vs 542	ENST00000263967	6	23	0.5226	3.6469	0.3603	0.3914	0.1473
PIK3CA:345:01:ENST00000263967	4	STAD	1	PIK3CA	345 vs 545	ENST00000263967	4	9	0.5231	2.1487	0.4452	0.983	0.8544
APC:232:01:ENST00000257430	5	COAD	1	APC	232 vs 805	ENST00000257430	5	5	0.5238	0	0.9996	0.3695	0.1653
TP53:110:01:ENST00000269305	5	HNSC	1	TP53	110 vs 298	ENST00000269305	5	5	0.5238	0.569	0.5189	0.8921	0.6288
TP53:136:01:ENST00000269305	5	HNSC	1	TP53	136 vs 157	ENST00000269305	5	4	0.5238	2.2403	0.4864	0.7713	0.4692
TP53:152:01:ENST00000269305	4	LUAD	1	TP53	152 vs 331	ENST00000269305	4	5	0.5238	NA	0.9996	0.7104	0.4198
TP53:157:01:ENST00000269305	5	LUAD	1	TP53	157 vs 205	ENST00000269305	5	4	0.5238	0	0.9993	0.0168	0.0045
TP53:157:01:ENST00000269305	5	LUAD	1	TP53	157 vs 337	ENST00000269305	5	4	0.5238	0	0.9993	0.0168	0.0045
TP53:286:01:ENST00000269305	5	LUAD	1	TP53	286 vs 331	ENST00000269305	5	5	0.5238	2.395	0.4836	0.9731	0.8156
TP53:132:01:ENST00000269305	6	OV	1	TP53	132 vs 275	ENST00000269305	6	4	0.5238	1.7508	0.5232	0.884	0.6154
TP53:179:01:ENST00000269305	5	OV	1	TP53	179 vs 193	ENST00000269305	5	5	0.5238	0.3516	0.3658	0.942	0.7315
TP53:125:01:ENST00000269305	7	LUSC	1	TP53	125 vs 179	ENST00000269305	7	9	0.5241	0.4344	0.4719	0.8113	0.5194
TP53:187:01:ENST00000269305	10	OV	1	TP53	187 vs 342	ENST00000269305	10	4	0.5255	1.6702	0.5334	0.2164	0.0328
TP53:234:01:ENST00000269305	9	LUSC	1	TP53	234 vs 298	ENST00000269305	9	4	0.5259	1.6754	0.5194	0.8091	0.535
PTEN:136:01:ENST00000371953	7	UCEC	1	PTEN	136 vs 92	ENST00000371953	7	7	0.5262	2.2674	0.5056	0.9664	0.7929
VHL:155:01:ENST00000256474	10	KIRC	1	VHL	155 vs 158	ENST00000256474	10	7	0.5266	0.6334	0.5346	0.3146	0.1209
TP53:179:01:ENST00000269305	5	OV	1	TP53	179 vs 278	ENST00000269305	5	6	0.5281	0.4013	0.46	0.7795	0.475
CTCF:318:01:ENST00000264010	4	UCEC	1	CTCF	318 vs 377	ENST00000264010	4	9	0.5287	1.7991	0.6326	0.7154	0.43
PIK3CA:545:01:ENST00000263967	26	UCEC	1	PIK3CA	545 vs 546	ENST00000263967	26	18	0.5307	0.5419	0.5034	0.7725	0.468
TP53:176:01:ENST00000269305	6	HNSC	1	TP53	176 vs 248	ENST00000269305	6	13	0.5313	0.6153	0.5549	0.6252	0.3135
PIK3CA:1021:01:ENST00000263967	4	UCEC	1	PIK3CA	1021 vs 545	ENST00000263967	4	26	0.5313	0	0.9994	0.9609	0.7845
TP53:179:01:ENST00000269305	9	LGG	1	TP53	179 vs 282	ENST00000269305	9	7	0.5315	2.7533	0.4276	0.3239	0.1301
TP53:192:01:ENST00000269305	5	OV	1	TP53	192 vs 238	ENST00000269305	5	5	0.5317	0.3904	0.4482	0.8397	0.5543
ERBB2:755:01:ENST00000269571	7	BRCA	1	ERBB2	755 vs 777	ENST00000269571	6	4	0.5333	NA	0.9996	0.5521	0.2663
APC:1378:01:ENST00000257430	6	COAD	1	APC	1378 vs 941	ENST00000257430	6	4	0.5333	NA	NA	0.4497	0.2241
APC:499:01:ENST00000257430	6	COAD	1	APC	499 vs 564	ENST00000257430	6	4	0.5333	0	0.9996	0.8227	0.5441
TP53:241:01:ENST00000269305	6	OV	1	TP53	241 vs 281	ENST00000269305	6	4	0.5333	2.2444	0.4753	0.3296	0.1401
TP53:245:01:ENST00000269305	8	OV	1	TP53	245 vs 275	ENST00000269305	8	4	0.5333	1.8017	0.5339	0.4091	0.1571
TP53:245:01:ENST00000269305	8	OV	1	TP53	245 vs 342	ENST00000269305	8	4	0.5333	0.6097	0.5256	0.3738	0.0737
TP53:213:01:ENST00000269305	4	PAAD	1	TP53	213 vs 248	ENST00000269305	4	10	0.5335	0.6264	0.562	0.9242	0.6838
TP53:179:01:ENST00000269305	8	HNSC	1	TP53	179 vs 337	ENST00000269305	8	5	0.5346	0.5233	0.5176	0.9665	0.7955
TP53:158:01:ENST00000269305	16	LUSC	1	TP53	158 vs 214	ENST00000269305	16	4	0.5346	0.2236	0.2903	0.0544	0.0458
GATA3:350:01:ENST00000346208	4	BRCA	1	GATA3	350 vs 408	ENST00000346208	4	12	0.5352	0	0.9994	0.8094	0.5279
TP53:175:01:ENST00000269305	19	BRCA	1	TP53	175 vs 176	ENST00000269305	19	6	0.5356	1.6651	0.6635	0.9546	0.7578
TP53:187:01:ENST00000269305	6	LUSC	1	TP53	187 vs 266	ENST00000269305	6	5	0.5368	2.1673	0.5094	0.8951	0.6409
TP53:193:01:ENST00000269305	5	OV	1	TP53	193 vs 272	ENST00000269305	5	6	0.5368	0.5901	0.5276	0.9565	0.7667
PIK3CA:118:01:ENST00000263967	5	BRCA	1	PIK3CA	118 vs 542	ENST00000263967	5	38	0.5372	2.1222	0.5151	0.974	0.821
TP53:125:01:ENST00000269305	4	HNSC	1	TP53	125 vs 196	ENST00000269305	4	8	0.5374	1.716	0.5601	0.4726	0.2588
TP53:175:01:ENST00000269305	8	LUSC	1	TP53	175 vs 282	ENST00000269305	8	6	0.5375	1.6009	0.5444	0.9576	0.7518
EGFR:289:01:ENST00000275493	21	GBM	1	EGFR	289 vs 598	ENST00000275493	21	12	0.5378	0.7706	0.5314	0.8953	0.6302
TP53:245:01:ENST00000269305	14	LUSC	1	TP53	245 vs 282	ENST00000269305	14	6	0.5379	0.6226	0.531	0.9811	0.8469
TP53:278:01:ENST00000269305	4	HNSC	1	TP53	278 vs 337	ENST00000269305	4	5	0.5397	0.4343	0.4977	0.9826	0.8509
TP53:159:01:ENST00000269305	4	LUSC	1	TP53	159 vs 220	ENST00000269305	4	5	0.5397	0.4434	0.4836	0.5833	0.2889
TP53:242:01:ENST00000269305	5	LUSC	1	TP53	242 vs 271	ENST00000269305	5	4	0.5397	2.2743	0.5122	0.681	0.3677
TP53:244:01:ENST00000269305	5	OV	1	TP53	244 vs 281	ENST00000269305	5	4	0.5397	0.4472	0.5699	0.5306	0.2726
PIK3CA:1047:01:ENST00000263967	7	STAD	1	PIK3CA	1047 vs 545	ENST00000263967	7	9	0.5406	1.8022	0.5193	0.7575	0.4479
TP53:105:01:ENST00000269305	5	LUSC	1	TP53	105 vs 187	ENST00000269305	5	6	0.5411	0.5176	0.4819	0.1982	0.0361
TP53:213:01:ENST00000269305	4	ESCA	1	TP53	213 vs 248	ENST00000269305	4	14	0.5412	1.5945	0.5148	0.8837	0.6029
TP53:196:01:ENST00000269305	8	HNSC	1	TP53	196 vs 213	ENST00000269305	8	11	0.5413	0.6302	0.5288	0.5292	0.2677
TP53:273:01:ENST00000269305	20	BRCA	1	TP53	273 vs 280	ENST00000269305	20	5	0.542	0.3896	0.4164	0.3078	0.1656
TP53:110:01:ENST00000269305	5	HNSC	1	TP53	110 vs 179	ENST00000269305	5	8	0.5423	1.8485	0.5431	0.7658	0.452
TP53:132:01:ENST00000269305	4	BLCA	1	TP53	132 vs 271	ENST00000269305	4	4	0.5429	0.5447	0.5096	0.4376	0.1207
TP53:192:01:ENST00000269305	4	BLCA	1	TP53	192 vs 245	ENST00000269305	4	4	0.5429	2.4495	0.5285	0.9994	0.9714
TP53:220:01:ENST00000269305	4	ESCA	1	TP53	220 vs 278	ENST00000269305	4	4	0.5429	NA	0.9996	0.2443	0.1015
VHL:115:01:ENST00000256474	4	KIRC	1	VHL	115 vs 65	ENST00000256474	4	4	0.5429	0	0.9996	0.0599	0.0077
TP53:152:01:ENST00000269305	4	LUAD	1	TP53	152 vs 159	ENST00000269305	4	4	0.5429	0.4935	0.5483	0.204	0.0373
TP53:179:01:ENST00000269305	4	PAAD	1	TP53	179 vs 213	ENST00000269305	4	4	0.5429	2	0.5006	0.6099	0.3261
CDKN2A:51:06:ENST00000304494	4	SKCM	6	CDKN2A	51 vs 80	ENST00000304494	4	4	0.5429	0.4529	0.5187	0.1186	0.0319
TP53:193:01:ENST00000269305	4	UCEC	1	TP53	193 vs 205	ENST00000269305	4	4	0.5429	0.4782	0.5561	0.6997	0.3851
CDKN2A:110:01:ENST00000304494	8	HNSC	1	CDKN2A	110 vs 58	ENST00000304494	8	10	0.5438	1.4749	0.5408	0.9885	0.8794
TP53:126:01:ENST00000269305	7	BRCA	1	TP53	126 vs 342	ENST00000269305	7	9	0.5446	NA	0.9996	0.8278	0.5503
APC:1414:01:ENST00000257430	7	COAD	1	APC	1414 vs 216	ENST00000257430	6	10	0.5447	0.5328	0.613	0.7129	0.4135
TP53:110:01:ENST00000269305	5	BRCA	1	TP53	110 vs 176	ENST00000269305	5	6	0.5455	0	0.9996	0.7874	0.4869
TP53:176:01:ENST00000269305	6	BRCA	1	TP53	176 vs 225	ENST00000269305	6	5	0.5455	NA	0.9996	0.9789	0.8277
TP53:176:01:ENST00000269305	6	BRCA	1	TP53	176 vs 280	ENST00000269305	6	5	0.5455	0	0.9996	0.7919	0.5033
TP53:176:01:ENST00000269305	6	BRCA	1	TP53	176 vs 331	ENST00000269305	6	5	0.5455	NA	0.9996	0.9934	0.9086
TP53:135:01:ENST00000269305	4	LUSC	1	TP53	135 vs 179	ENST00000269305	4	9	0.5455	3.2414	0.3414	0.1649	0.0908
TP53:172:01:ENST00000269305	4	LUSC	1	TP53	172 vs 179	ENST00000269305	4	9	0.5455	0	0.9992	0.475	0.2454
TP53:234:01:ENST00000269305	9	LUSC	1	TP53	234 vs 242	ENST00000269305	9	5	0.5455	1.6821	0.5283	0.259	0.1085
TP53:273:01:ENST00000269305	19	OV	1	TP53	273 vs 275	ENST00000269305	19	4	0.5455	1.5203	0.5873	0.915	0.6836
PIK3R1:457:01:ENST00000521381	5	UCEC	1	PIK3R1	457 vs 564	ENST00000521381	5	6	0.5455	0	0.9995	0.0269	0.009
PIK3R1:564:01:ENST00000521381	6	UCEC	1	PIK3R1	564 vs 577	ENST00000521381	6	5	0.5455	NA	0.9994	0.3917	0.1775
PIK3R1:564:01:ENST00000521381	6	UCEC	1	PIK3R1	564 vs 642	ENST00000521381	6	5	0.5455	NA	0.9994	0.1788	0.068
PTEN:343:01:ENST00000371953	5	UCEC	1	PTEN	343 vs 70	ENST00000371953	5	6	0.5455	0	0.9996	0.6726	0.3716
APC:1397:01:ENST00000257430	6	COAD	1	APC	1397 vs 213	ENST00000257430	6	11	0.5464	2.0371	0.5727	0.4502	0.1949
TP53:158:01:ENST00000269305	16	LUSC	1	TP53	158 vs 298	ENST00000269305	16	4	0.5474	0.5782	0.5101	0.9968	0.9353
TP53:110:01:ENST00000269305	5	HNSC	1	TP53	110 vs 280	ENST00000269305	5	5	0.5476	0.5416	0.5036	0.7982	0.4991
TP53:196:01:ENST00000269305	8	HNSC	1	TP53	196 vs 273	ENST00000269305	8	12	0.5485	0.6596	0.549	0.3882	0.1812
TP53:220:01:ENST00000269305	10	BRCA	1	TP53	220 vs 331	ENST00000269305	10	5	0.5495	NA	0.9995	0.9848	0.8621
TP53:132:01:ENST00000269305	6	OV	1	TP53	132 vs 157	ENST00000269305	6	5	0.5498	1.669	0.5597	0.5616	0.2735
FGFR2:252:01:ENST00000358487	22	UCEC	1	FGFR2	252 vs 549	ENST00000358487	22	6	0.5506	NA	0.9991	0.4262	0.2174
TP53:245:01:ENST00000269305	14	LUSC	1	TP53	245 vs 249	ENST00000269305	14	7	0.5513	2.1587	0.4828	0.9745	0.8194
VHL:158:01:ENST00000256474	7	KIRC	1	VHL	158 vs 65	ENST00000256474	7	4	0.5515	1.6402	0.5592	0.9992	0.9675
TP53:175:01:ENST00000269305	19	BRCA	1	TP53	175 vs 280	ENST00000269305	19	5	0.5519	0.4073	0.4647	0.7769	0.496
TP53:173:01:ENST00000269305	7	HNSC	1	TP53	173 vs 179	ENST00000269305	7	8	0.5529	1.8389	0.5056	0.8161	0.5185
TP53:213:01:ENST00000269305	5	LGG	1	TP53	213 vs 273	ENST00000269305	5	59	0.5534	2.6071	0.3761	0.6653	0.395
PIK3CA:345:01:ENST00000263967	8	UCEC	1	PIK3CA	345 vs 38	ENST00000263967	8	9	0.5539	0.4877	0.5347	0.1809	0.0656
PIK3CA:1047:01:ENST00000263967	7	LUSC	1	PIK3CA	1047 vs 545	ENST00000263967	7	15	0.5551	1.6512	0.4907	0.317	0.1521
TP53:175:01:ENST00000269305	8	LUSC	1	TP53	175 vs 187	ENST00000269305	8	6	0.5554	1.5668	0.5654	0.9968	0.9155
PIK3CA:111:01:ENST00000263967	5	BRCA	1	PIK3CA	111 vs 420	ENST00000263967	5	5	0.5556	NA	NA	0.0078	0.0009
TP53:110:01:ENST00000269305	5	BRCA	1	TP53	110 vs 280	ENST00000269305	5	5	0.5556	0	0.9996	0.6148	0.33
TP53:132:01:ENST00000269305	5	BRCA	1	TP53	132 vs 280	ENST00000269305	5	5	0.5556	0	0.9996	0.422	0.203
TP53:135:01:ENST00000269305	4	BRCA	1	TP53	135 vs 187	ENST00000269305	4	5	0.5556	2.2361	0.5852	0.9823	0.8492
TP53:157:01:ENST00000269305	4	BRCA	1	TP53	157 vs 282	ENST00000269305	4	5	0.5556	0	0.9994	0.832	0.5392
TP53:173:01:ENST00000269305	4	BRCA	1	TP53	173 vs 280	ENST00000269305	4	5	0.5556	NA	0.9996	0.9897	0.886
TP53:195:01:ENST00000269305	4	BRCA	1	TP53	195 vs 282	ENST00000269305	4	5	0.5556	0	0.9994	0.7072	0.4011
TP53:225:01:ENST00000269305	5	BRCA	1	TP53	225 vs 280	ENST00000269305	5	5	0.5556	0	0.9996	0.949	0.7469
TP53:225:01:ENST00000269305	5	BRCA	1	TP53	225 vs 331	ENST00000269305	5	5	0.5556	NA	0.9996	0.9217	0.6879
TP53:238:01:ENST00000269305	4	BRCA	1	TP53	238 vs 282	ENST00000269305	4	5	0.5556	0	0.9995	0.3788	0.1692
TP53:278:01:ENST00000269305	4	BRCA	1	TP53	278 vs 282	ENST00000269305	4	5	0.5556	0	0.9994	0.9985	0.956
TP53:110:01:ENST00000269305	5	HNSC	1	TP53	110 vs 157	ENST00000269305	5	4	0.5556	2.1487	0.5354	0.9722	0.8116
TP53:110:01:ENST00000269305	5	HNSC	1	TP53	110 vs 220	ENST00000269305	5	4	0.5556	NA	0.9994	0.9898	0.8861
TP53:110:01:ENST00000269305	5	HNSC	1	TP53	110 vs 236	ENST00000269305	5	4	0.5556	NA	0.9994	0.9949	0.9194
TP53:125:01:ENST00000269305	4	HNSC	1	TP53	125 vs 337	ENST00000269305	4	5	0.5556	2.717	0.4147	0.8931	0.6389
TP53:151:01:ENST00000269305	5	HNSC	1	TP53	151 vs 294	ENST00000269305	5	4	0.5556	2.1908	0.4995	0.4527	0.204
TP53:220:01:ENST00000269305	5	HNSC	1	TP53	220 vs 236	ENST00000269305	5	4	0.5556	0	0.9996	0.9999	0.9886
TP53:213:01:ENST00000269305	5	LGG	1	TP53	213 vs 275	ENST00000269305	5	4	0.5556	NA	0.9996	0.568	0.2865
TP53:135:01:ENST00000269305	4	LUSC	1	TP53	135 vs 266	ENST00000269305	4	5	0.5556	2.4495	0.5285	0.8513	0.5793
TP53:135:01:ENST00000269305	4	LUSC	1	TP53	135 vs 307	ENST00000269305	4	5	0.5556	3.1623	0.4188	0.1457	0.0612
TP53:172:01:ENST00000269305	4	LUSC	1	TP53	172 vs 307	ENST00000269305	4	5	0.5556	0	0.9995	0.2121	0.0888
TP53:225:01:ENST00000269305	4	LUSC	1	TP53	225 vs 307	ENST00000269305	4	5	0.5556	3.4641	0.3809	0.1634	0.0677
TP53:193:01:ENST00000269305	5	OV	1	TP53	193 vs 244	ENST00000269305	5	5	0.5556	2.1908	0.4995	0.7995	0.5043
TP53:234:01:ENST00000269305	5	OV	1	TP53	234 vs 281	ENST00000269305	5	4	0.5556	0	0.9996	0.9052	0.655
TP53:237:01:ENST00000269305	5	OV	1	TP53	237 vs 342	ENST00000269305	5	4	0.5556	1.8317	0.4941	0.6703	0.2783
TP53:175:01:ENST00000269305	5	SARC	1	TP53	175 vs 187	ENST00000269305	5	4	0.5556	2.0583	0.5575	0.9999	0.9876
ARID1A:1335:01:ENST00000324856	4	UCEC	1	ARID1A	1335 vs 766	ENST00000324856	4	5	0.5556	0	0.9996	0.568	0.2865
ARID1A:1721:01:ENST00000324856	4	UCEC	1	ARID1A	1721 vs 766	ENST00000324856	4	5	0.5556	0	0.9996	0.9425	0.7303
ARID1A:693:01:ENST00000324856	4	UCEC	1	ARID1A	693 vs 766	ENST00000324856	4	5	0.5556	0	0.9996	0.9148	0.6726
NRIP1:516:01:ENST00000318948	5	UCEC	1	NRIP1	516 vs 729	ENST00000318948	5	4	0.5556	NA	0.9995	0.2685	0.1143
PIK3R1:376:01:ENST00000521381	4	UCEC	1	PIK3R1	376 vs 575	ENST00000521381	4	5	0.5556	0.4175	0.4836	0.4801	0.2187
TP53:179:01:ENST00000269305	4	UCEC	1	TP53	179 vs 282	ENST00000269305	4	5	0.5556	0	0.9996	0.6683	0.3655
TP53:195:01:ENST00000269305	12	OV	1	TP53	195 vs 306	ENST00000269305	12	4	0.556	0.6879	0.583	0.2568	0.0344
TP53:179:01:ENST00000269305	8	HNSC	1	TP53	179 vs 307	ENST00000269305	8	4	0.5576	0.4857	0.4735	0.403	0.1482
TP53:175:01:ENST00000269305	7	LGG	1	TP53	175 vs 237	ENST00000269305	7	4	0.5576	0	0.9996	0.2786	0.0837
TP53:163:01:ENST00000269305	7	LUSC	1	TP53	163 vs 214	ENST00000269305	7	4	0.5576	0.4082	0.5285	0.9552	0.7641
TP53:175:01:ENST00000269305	8	UCEC	1	TP53	175 vs 179	ENST00000269305	8	4	0.5576	1.8813	0.5874	0.7934	0.4869
TP53:241:01:ENST00000269305	9	UCEC	1	TP53	241 vs 273	ENST00000269305	9	21	0.5591	0.5054	0.5307	0.4263	0.2102
TP53:179:01:ENST00000269305	8	HNSC	1	TP53	179 vs 282	ENST00000269305	8	8	0.5593	0.5807	0.5309	0.5478	0.2688
TP53:157:01:ENST00000269305	14	LUSC	1	TP53	157 vs 242	ENST00000269305	14	5	0.5593	1.5968	0.5899	0.9516	0.7496
PIK3CA:345:01:ENST00000263967	16	BRCA	1	PIK3CA	345 vs 546	ENST00000263967	16	11	0.5597	2.067	0.5183	0.8368	0.5546
TP53:175:01:ENST00000269305	11	STAD	1	TP53	175 vs 179	ENST00000269305	11	4	0.5597	0.5	0.644	0.9004	0.6361
TP53:175:01:ENST00000269305	8	LUSC	1	TP53	175 vs 214	ENST00000269305	8	4	0.5616	1.899	0.5679	0.8766	0.6352
TP53:241:01:ENST00000269305	6	OV	1	TP53	241 vs 261	ENST00000269305	6	4	0.5619	0.5671	0.493	0.9702	0.807
TP53:261:01:ENST00000269305	4	OV	1	TP53	261 vs 272	ENST00000269305	4	6	0.5619	1.853	0.506	0.9326	0.7052
TP53:220:01:ENST00000269305	8	OV	1	TP53	220 vs 278	ENST00000269305	8	6	0.5621	1.5433	0.5584	0.9983	0.953
KRAS:13:01:ENST00000256078	29	COAD	1	KRAS	13 vs 146	ENST00000256078	29	10	0.5628	1.5435	0.5834	0.9994	0.9805
TP53:163:01:ENST00000269305	7	HNSC	1	TP53	163 vs 173	ENST00000269305	7	7	0.5629	0.6096	0.5511	0.9607	0.7724
TP53:157:01:ENST00000269305	5	OV	1	TP53	157 vs 282	ENST00000269305	5	5	0.5635	0.5853	0.5641	0.9087	0.6577
TP53:179:01:ENST00000269305	5	OV	1	TP53	179 vs 192	ENST00000269305	5	5	0.5635	0.4899	0.6157	0.2326	0.0983
TP53:192:01:ENST00000269305	5	OV	1	TP53	192 vs 244	ENST00000269305	5	5	0.5635	2.0412	0.6157	0.5103	0.2564
TP53:248:01:ENST00000269305	21	OV	1	TP53	248 vs 342	ENST00000269305	21	4	0.5638	1.3027	0.6604	0.3589	0.0584
TP53:126:01:ENST00000269305	7	BRCA	1	TP53	126 vs 273	ENST00000269305	7	20	0.5642	1.682	0.5675	0.8564	0.5735
GATA3:308:01:ENST00000346208	20	BRCA	1	GATA3	308 vs 330	ENST00000346208	20	6	0.5652	0.505	0.555	0.5794	0.322
TP53:220:01:ENST00000269305	8	OV	1	TP53	220 vs 261	ENST00000269305	8	4	0.5657	0.5738	0.5033	0.9452	0.731
APC:499:01:ENST00000257430	6	COAD	1	APC	499 vs 876	ENST00000257430	6	12	0.5665	0.5135	0.5561	0.6216	0.3427
APC:216:01:ENST00000257430	10	COAD	1	APC	216 vs 943	ENST00000257430	10	4	0.5674	0.539	0.543	0.6686	0.3514
PIK3CA:542:01:ENST00000263967	11	LUSC	1	PIK3CA	542 vs 545	ENST00000263967	11	15	0.5677	1.4055	0.5656	0.5184	0.2631
TP53:236:01:ENST00000269305	4	HNSC	1	TP53	236 vs 245	ENST00000269305	4	9	0.5678	0	0.9991	0.9199	0.7475
TP53:273:01:ENST00000269305	19	COAD	1	TP53	273 vs 282	ENST00000269305	19	11	0.5688	0.6421	0.5644	0.4312	0.2092
TP53:245:01:ENST00000269305	8	OV	1	TP53	245 vs 281	ENST00000269305	8	4	0.5697	1.9551	0.5647	0.9125	0.673
TP53:307:01:ENST00000269305	4	OV	1	TP53	307 vs 331	ENST00000269305	4	7	0.5697	0.5779	0.5629	0.085	0.0112
CTNNB1:32:01:ENST00000349496	17	LIHC	1	CTNNB1	32 vs 41	ENST00000349496	17	6	0.5704	1.9383	0.546	0.9745	0.8218
TP53:135:01:ENST00000269305	4	BRCA	1	TP53	135 vs 273	ENST00000269305	4	20	0.5707	2.0764	0.5326	0.9269	0.7049
TP53:220:01:ENST00000269305	9	LGG	1	TP53	220 vs 282	ENST00000269305	9	7	0.5708	0.5068	0.5864	0.6378	0.3371
TP53:132:01:ENST00000269305	4	BLCA	1	TP53	132 vs 159	ENST00000269305	4	4	0.5714	2.5324	0.4495	0.1677	0.0414
TP53:110:01:ENST00000269305	5	BRCA	1	TP53	110 vs 245	ENST00000269305	5	5	0.5714	0	0.9996	0.5183	0.2515
TP53:173:01:ENST00000269305	4	BRCA	1	TP53	173 vs 194	ENST00000269305	4	4	0.5714	0	0.9996	1	0.9969
TP53:213:01:ENST00000269305	10	COAD	1	TP53	213 vs 331	ENST00000269305	10	4	0.5714	0	0.9996	0.9343	0.7182
TP53:298:01:ENST00000269305	5	HNSC	1	TP53	298 vs 32	ENST00000269305	5	4	0.5714	0.5859	0.517	0.3679	0.1383
TP53:125:01:ENST00000269305	4	LGG	1	TP53	125 vs 275	ENST00000269305	4	4	0.5714	2.5616	0.4482	0.7954	0.4855
TP53:158:01:ENST00000269305	4	LGG	1	TP53	158 vs 275	ENST00000269305	4	4	0.5714	NA	0.9996	0.8332	0.5457
TP53:173:01:ENST00000269305	4	LGG	1	TP53	173 vs 196	ENST00000269305	4	5	0.5714	0	0.9995	0.198	0.0703
TP53:159:01:ENST00000269305	4	LUAD	1	TP53	159 vs 286	ENST00000269305	4	5	0.5714	1.8063	0.5184	0.3753	0.0828
TP53:205:01:ENST00000269305	4	LUAD	1	TP53	205 vs 273	ENST00000269305	4	5	0.5714	NA	0.9993	0.6649	0.3716
TP53:135:01:ENST00000269305	4	LUSC	1	TP53	135 vs 176	ENST00000269305	4	5	0.5714	0.5411	0.5875	0.1906	0.0346
TP53:179:01:ENST00000269305	5	OV	1	TP53	179 vs 275	ENST00000269305	5	4	0.5714	0.3548	0.3983	0.8332	0.529
TP53:192:01:ENST00000269305	5	OV	1	TP53	192 vs 342	ENST00000269305	5	4	0.5714	0.4343	0.4977	0.1156	0.0153
TP53:241:01:ENST00000269305	6	OV	1	TP53	241 vs 306	ENST00000269305	6	4	0.5714	0.6368	0.5281	0.7788	0.3678
TP53:179:01:ENST00000269305	4	PAAD	1	TP53	179 vs 282	ENST00000269305	4	5	0.5714	1.8667	0.5058	0.1609	0.0414
ASXL3:1370:06:ENST00000269197	6	SKCM	6	ASXL3	1370 vs 453	ENST00000269197	6	4	0.5714	1.5623	0.5739	0.4794	0.1383
TP53:152:01:ENST00000269305	5	STAD	1	TP53	152 vs 179	ENST00000269305	5	4	0.5714	0.4472	0.5699	0.9983	0.9539
TP53:241:01:ENST00000269305	5	BLCA	1	TP53	241 vs 280	ENST00000269305	5	13	0.5724	1.5143	0.5878	0.3855	0.1282
CDKN2A:110:01:ENST00000304494	8	HNSC	1	CDKN2A	110 vs 153	ENST00000304494	8	8	0.573	1.4563	0.5777	0.8285	0.5449
TP53:158:01:ENST00000269305	16	LUSC	1	TP53	158 vs 271	ENST00000269305	16	4	0.5746	1.8879	0.5624	0.9977	0.9461
TP53:273:01:ENST00000269305	12	HNSC	1	TP53	273 vs 280	ENST00000269305	12	5	0.5747	0.6396	0.5304	0.2099	0.1105
TP53:126:01:ENST00000269305	7	BRCA	1	TP53	126 vs 157	ENST00000269305	7	4	0.5758	NA	0.9996	0.7697	0.4986
TP53:126:01:ENST00000269305	7	BRCA	1	TP53	126 vs 278	ENST00000269305	7	4	0.5758	NA	0.9996	0.9867	0.8522
TP53:135:01:ENST00000269305	7	ESCA	1	TP53	135 vs 278	ENST00000269305	7	4	0.5758	2.1623	0.5063	0.9829	0.8517
TP53:125:01:ENST00000269305	4	HNSC	1	TP53	125 vs 173	ENST00000269305	4	7	0.5758	1.513	0.6514	0.7651	0.478
APC:1114:01:ENST00000257430	7	COAD	1	APC	1114 vs 1397	ENST00000257430	7	6	0.5781	0	0.9996	0.5976	0.3076
TP53:175:01:ENST00000269305	8	LUSC	1	TP53	175 vs 244	ENST00000269305	8	6	0.5781	1.5426	0.5797	0.9461	0.7235
TP53:261:01:ENST00000269305	5	STAD	1	TP53	261 vs 273	ENST00000269305	5	11	0.5783	1.4648	0.5829	0.1177	0.0112
PIK3CA:453:01:ENST00000263967	5	BRCA	1	PIK3CA	453 vs 546	ENST00000263967	5	11	0.5788	2.9665	0.447	0.7212	0.4359
TP53:158:01:ENST00000269305	16	LUSC	1	TP53	158 vs 282	ENST00000269305	16	6	0.5791	0.6671	0.5779	0.9159	0.6831
PTEN:127:01:ENST00000371953	6	UCEC	1	PTEN	127 vs 267	ENST00000371953	5	9	0.5794	2.1909	0.5838	0.9571	0.7693
APC:1450:01:ENST00000257430	19	COAD	1	APC	1450 vs 805	ENST00000257430	19	5	0.5795	1.8238	0.5842	0.4549	0.1918
TP53:248:01:ENST00000269305	10	LUSC	1	TP53	248 vs 273	ENST00000269305	10	14	0.5796	1.4222	0.5693	0.96	0.7763
TP53:163:01:ENST00000269305	7	HNSC	1	TP53	163 vs 282	ENST00000269305	7	8	0.5809	0.6465	0.5721	0.6615	0.3598
APC:1397:01:ENST00000257430	6	COAD	1	APC	1397 vs 1408	ENST00000257430	6	4	0.581	0.5372	0.5351	0.6792	0.3577
TP53:136:01:ENST00000269305	5	HNSC	1	TP53	136 vs 179	ENST00000269305	5	8	0.5812	1.6231	0.5985	0.9582	0.768
PIK3CA:1044:01:ENST00000263967	6	UCEC	1	PIK3CA	1044 vs 38	ENST00000263967	6	10	0.5812	0.5164	0.556	0.2475	0.1058
APC:1556:01:ENST00000257430	9	COAD	1	APC	1556 vs 232	ENST00000257430	9	5	0.5814	NA	0.9993	0.3017	0.1422
PTEN:157:01:ENST00000371953	4	UCEC	1	PTEN	157 vs 92	ENST00000371953	4	7	0.5818	2.6458	0.5006	0.9473	0.7377
TP53:205:01:ENST00000269305	4	UCEC	1	TP53	205 vs 273	ENST00000269305	4	21	0.5821	1.3868	0.6533	0.4097	0.1335
TP53:173:01:ENST00000269305	7	HNSC	1	TP53	173 vs 280	ENST00000269305	7	5	0.5833	0.6113	0.5502	0.9472	0.7408
VHL:155:01:ENST00000256474	10	KIRC	1	VHL	155 vs 65	ENST00000256474	10	4	0.5834	0.659	0.6205	0.4574	0.1795
APC:213:01:ENST00000257430	12	COAD	1	APC	213 vs 564	ENST00000257430	12	4	0.5835	0.4082	0.5285	0.6808	0.41
ARID1A:1072:01:ENST00000324856	7	UCEC	1	ARID1A	1072 vs 1850	ENST00000324856	7	17	0.5842	0	0.9992	0.7661	0.4781
TP53:105:01:ENST00000269305	5	LUSC	1	TP53	105 vs 154	ENST00000269305	5	7	0.5859	1.6513	0.5847	0.3144	0.1103
PIK3CA:118:01:ENST00000263967	5	BRCA	1	PIK3CA	118 vs 545	ENST00000263967	5	60	0.5866	2.0089	0.5344	0.7896	0.4715
PTEN:127:01:ENST00000371953	6	UCEC	1	PTEN	127 vs 233	ENST00000371953	5	23	0.5871	2.3118	0.494	0.9923	0.9006
TP53:187:01:ENST00000269305	5	BRCA	1	TP53	187 vs 242	ENST00000269305	5	5	0.5873	0.433	0.5685	0.3195	0.1391
APC:1114:01:ENST00000257430	7	COAD	1	APC	1114 vs 1378	ENST00000257430	7	6	0.5874	0	0.9996	0.9089	0.6595
TP53:135:01:ENST00000269305	7	ESCA	1	TP53	135 vs 282	ENST00000269305	7	4	0.5879	0.6068	0.5937	0.157	0.0893
APC:213:01:ENST00000257430	12	COAD	1	APC	213 vs 232	ENST00000257430	12	5	0.5882	NA	0.9994	0.5148	0.2738
PIK3R1:457:01:ENST00000521381	5	UCEC	1	PIK3R1	457 vs 582	ENST00000521381	5	11	0.5893	0	0.9994	0.9941	0.9128
PTEN:323:01:ENST00000371953	11	UCEC	1	PTEN	323 vs 343	ENST00000371953	11	5	0.5893	NA	0.9994	0.94	0.728
KRAS:13:01:ENST00000256078	29	COAD	1	KRAS	13 vs 61	ENST00000256078	29	5	0.5905	1.6418	0.6413	0.9809	0.8427
CTNNB1:335:01:ENST00000349496	4	LIHC	1	CTNNB1	335 vs 41	ENST00000349496	4	6	0.5905	2.3028	0.4977	0.9345	0.7096
TP53:193:01:ENST00000269305	7	LUSC	1	TP53	193 vs 242	ENST00000269305	7	5	0.5909	NA	0.9996	0.4071	0.1764
TP53:242:01:ENST00000269305	5	LUSC	1	TP53	242 vs 331	ENST00000269305	5	7	0.5909	0	0.9996	0.4049	0.1649
PIK3CA:108:01:ENST00000263967	6	UCEC	1	PIK3CA	108 vs 545	ENST00000263967	6	25	0.5919	2.0874	0.548	0.2876	0.0875
PIK3CA:108:01:ENST00000263967	6	UCEC	1	PIK3CA	108 vs 118	ENST00000263967	6	9	0.5922	0.4906	0.54	0.8409	0.5509
CDKN2A:153:01:ENST00000304494	9	HNSC	1	CDKN2A	153 vs 58	ENST00000304494	8	10	0.5923	0.695	0.5927	0.6509	0.3537
PTEN:130:01:ENST00000371953	66	UCEC	1	PTEN	130 vs 290	ENST00000371953	63	6	0.593	NA	0.9987	0.919	0.6858
TP53:273:01:ENST00000269305	19	OV	1	TP53	273 vs 342	ENST00000269305	19	4	0.5933	0.7281	0.5909	0.4729	0.1028
PIK3CA:1021:01:ENST00000263967	4	UCEC	1	PIK3CA	1021 vs 344	ENST00000263967	4	7	0.5939	0	0.9996	0.8064	0.5172
PIK3CA:111:01:ENST00000263967	4	UCEC	1	PIK3CA	111 vs 344	ENST00000263967	4	7	0.5939	0	0.9996	0.9992	0.9684
PTEN:16:01:ENST00000371953	4	UCEC	1	PTEN	16 vs 92	ENST00000371953	4	7	0.5939	0	0.9996	0.5733	0.277
PTEN:7:01:ENST00000371953	4	UCEC	1	PTEN	7 vs 92	ENST00000371953	4	7	0.5939	0	0.9996	0.1627	0.044
TP53:163:01:ENST00000269305	7	HNSC	1	TP53	163 vs 213	ENST00000269305	7	11	0.5941	0.6761	0.5933	0.8119	0.5195
TP53:158:01:ENST00000269305	5	LUAD	1	TP53	158 vs 331	ENST00000269305	5	5	0.5952	2.0583	0.5575	0.754	0.4474
TP53:132:01:ENST00000269305	6	OV	1	TP53	132 vs 241	ENST00000269305	6	6	0.5952	1.475	0.5867	0.6958	0.3963
TP53:132:01:ENST00000269305	6	OV	1	TP53	132 vs 272	ENST00000269305	6	6	0.5952	1.5141	0.5897	0.9964	0.9324
APC:1556:01:ENST00000257430	9	COAD	1	APC	1556 vs 805	ENST00000257430	9	5	0.5954	1.9699	0.56	0.7387	0.4307
TP53:175:01:ENST00000269305	8	UCEC	1	TP53	175 vs 273	ENST00000269305	8	21	0.5959	1.461	0.5941	0.9542	0.7624
TP53:248:01:ENST00000269305	8	READ	1	TP53	248 vs 282	ENST00000269305	8	8	0.5964	0.6163	0.6028	0.9252	0.6944
TP53:157:01:ENST00000269305	14	LUSC	1	TP53	157 vs 163	ENST00000269305	14	7	0.5965	1.8804	0.5648	0.4379	0.216
PTEN:70:01:ENST00000371953	6	UCEC	1	PTEN	70 vs 92	ENST00000371953	6	7	0.5967	2	0.644	0.9911	0.8934
TP53:132:01:ENST00000269305	5	BRCA	1	TP53	132 vs 175	ENST00000269305	5	19	0.597	0.6154	0.6751	0.3541	0.1257
CDKN2A:153:01:ENST00000304494	9	HNSC	1	CDKN2A	153 vs 80	ENST00000304494	8	19	0.5972	0.739	0.6123	0.9722	0.8138
TP53:238:01:ENST00000269305	5	OV	1	TP53	238 vs 241	ENST00000269305	5	6	0.5974	2.1135	0.4568	0.2757	0.1132
PIK3CA:1044:01:ENST00000263967	6	UCEC	1	PIK3CA	1044 vs 118	ENST00000263967	6	9	0.5974	0.5359	0.5933	0.9992	0.9683
TP53:176:01:ENST00000269305	8	OV	1	TP53	176 vs 281	ENST00000269305	8	4	0.598	1.9174	0.5676	0.8063	0.5188
APC:1450:01:ENST00000257430	19	COAD	1	APC	1450 vs 876	ENST00000257430	19	10	0.5999	0.706	0.6079	0.5605	0.2696
APC:1408:01:ENST00000257430	4	COAD	1	APC	1408 vs 564	ENST00000257430	4	4	0.6	2.2078	0.5187	0.6483	0.3393
TP53:176:01:ENST00000269305	4	ESCA	1	TP53	176 vs 220	ENST00000269305	4	4	0.6	0	0.9993	0.0364	0.0077
TP53:236:01:ENST00000269305	4	HNSC	1	TP53	236 vs 307	ENST00000269305	4	4	0.6	0.5486	0.6246	0.5536	0.2675
TP53:205:01:ENST00000269305	4	LUAD	1	TP53	205 vs 245	ENST00000269305	4	6	0.6	NA	0.9996	0.671	0.3864
TP53:245:01:ENST00000269305	8	LUAD	1	TP53	245 vs 337	ENST00000269305	6	4	0.6	0	0.9996	0.8564	0.5854
TP53:225:01:ENST00000269305	4	LUSC	1	TP53	225 vs 298	ENST00000269305	4	4	0.6	0.4529	0.5187	0.8421	0.5457
TP53:272:01:ENST00000269305	6	OV	1	TP53	272 vs 306	ENST00000269305	6	4	0.6	0.6472	0.5738	0.4076	0.1095
TP53:307:01:ENST00000269305	4	OV	1	TP53	307 vs 342	ENST00000269305	4	4	0.6	1.8317	0.4941	1	1
TP53:213:01:ENST00000269305	4	PAAD	1	TP53	213 vs 245	ENST00000269305	4	4	0.6	1.8662	0.5404	0.56	0.2892
PTEN:212:01:ENST00000371953	7	UCEC	1	PTEN	212 vs 267	ENST00000371953	7	9	0.6	0	0.9996	0.0462	0.0132
TP53:220:01:ENST00000269305	10	BRCA	1	TP53	220 vs 225	ENST00000269305	10	5	0.6001	0.3651	0.4767	0.5776	0.3175
PTEN:323:01:ENST00000371953	11	UCEC	1	PTEN	323 vs 92	ENST00000371953	11	7	0.6008	0.5916	0.7115	0.1733	0.0715
TP53:152:01:ENST00000269305	5	STAD	1	TP53	152 vs 248	ENST00000269305	5	7	0.601	0.4574	0.5331	0.933	0.7107
TP53:136:01:ENST00000269305	5	HNSC	1	TP53	136 vs 245	ENST00000269305	5	9	0.6014	1.6114	0.56	0.2901	0.1443
PTEN:136:01:ENST00000371953	7	UCEC	1	PTEN	136 vs 267	ENST00000371953	7	9	0.6017	2.4048	0.4751	0.8273	0.5442
TP53:196:01:ENST00000269305	8	HNSC	1	TP53	196 vs 331	ENST00000269305	8	4	0.602	0.6224	0.6104	0.7071	0.3782
FGFR3:249:01:ENST00000260795	29	BLCA	1	FGFR3	249 vs 373	ENST00000260795	29	8	0.6023	1.8501	0.5657	0.9781	0.831
TP53:273:01:ENST00000269305	15	LUSC	1	TP53	273 vs 282	ENST00000269305	14	6	0.603	1.5114	0.6136	0.8642	0.5817
TP53:159:01:ENST00000269305	4	BLCA	1	TP53	159 vs 336	ENST00000269305	4	5	0.6032	1.6488	0.6222	0.6418	0.3517
CTNNB1:41:01:ENST00000349496	4	COAD	1	CTNNB1	41 vs 45	ENST00000349496	4	5	0.6032	0	0.9996	0.7381	0.4308
TP53:132:01:ENST00000269305	4	COAD	1	TP53	132 vs 176	ENST00000269305	4	5	0.6032	1.6783	0.578	0.884	0.6154
TP53:110:01:ENST00000269305	5	HNSC	1	TP53	110 vs 176	ENST00000269305	5	5	0.6032	1.5811	0.6522	0.8779	0.6091
TP53:110:01:ENST00000269305	5	HNSC	1	TP53	110 vs 224	ENST00000269305	5	4	0.6032	0.5875	0.5999	0.6208	0.3358
TP53:136:01:ENST00000269305	5	HNSC	1	TP53	136 vs 337	ENST00000269305	5	5	0.6032	1.8774	0.5862	0.9937	0.9102
TP53:151:01:ENST00000269305	5	HNSC	1	TP53	151 vs 331	ENST00000269305	5	4	0.6032	1.5447	0.6177	0.971	0.8096
TP53:283:01:ENST00000269305	4	HNSC	1	TP53	283 vs 337	ENST00000269305	4	5	0.6032	0.5	0.5714	0.8437	0.5596
TP53:105:01:ENST00000269305	5	LUSC	1	TP53	105 vs 266	ENST00000269305	5	5	0.6032	0.5263	0.5316	0.3319	0.1397
TP53:282:01:ENST00000269305	5	OV	1	TP53	282 vs 306	ENST00000269305	5	4	0.6032	1.7835	0.5321	0.4076	0.1095
TP53:175:01:ENST00000269305	5	SARC	1	TP53	175 vs 213	ENST00000269305	5	4	0.6032	2.0112	0.5807	0.9195	0.6809
ARID1A:1519:01:ENST00000324856	4	UCEC	1	ARID1A	1519 vs 551	ENST00000324856	4	5	0.6032	0	0.9996	0.2257	0.0802
ARID1A:2236:01:ENST00000324856	4	UCEC	1	ARID1A	2236 vs 551	ENST00000324856	4	5	0.6032	0	0.9996	0.6398	0.3414
ARID1A:551:01:ENST00000324856	5	UCEC	1	ARID1A	551 vs 766	ENST00000324856	5	4	0.6032	NA	0.9996	0.5592	0.2794
TP53:273:01:ENST00000269305	20	BRCA	1	TP53	273 vs 285	ENST00000269305	20	4	0.6049	0.6979	0.6785	0.4025	0.1444
PIK3CA:88:01:ENST00000263967	17	UCEC	1	PIK3CA	88 vs 93	ENST00000263967	17	8	0.6056	NA	0.9994	0.7893	0.4874
TP53:245:01:ENST00000269305	9	HNSC	1	TP53	245 vs 248	ENST00000269305	9	13	0.6059	0.6976	0.6114	0.6686	0.4136
TP53:157:01:ENST00000269305	4	HNSC	1	TP53	157 vs 196	ENST00000269305	4	8	0.6061	0.5253	0.5803	0.9924	0.9014
TP53:187:01:ENST00000269305	6	LUSC	1	TP53	187 vs 220	ENST00000269305	6	5	0.6061	0.6453	0.5967	0.9118	0.6588
CTNNB1:34:01:ENST00000349496	14	UCEC	1	CTNNB1	34 vs 41	ENST00000349496	14	11	0.6065	NA	0.9996	0.9902	0.8883
PTEN:267:01:ENST00000371953	9	UCEC	1	PTEN	267 vs 27	ENST00000371953	9	4	0.607	0.4009	0.5183	0.6361	0.3672
TP53:193:01:ENST00000269305	9	HNSC	1	TP53	193 vs 306	ENST00000269305	9	6	0.6074	0.6982	0.5555	0.8808	0.6249
TP53:195:01:ENST00000269305	12	OV	1	TP53	195 vs 261	ENST00000269305	12	4	0.6077	0.6774	0.6138	0.7581	0.4277
PIK3CA:111:01:ENST00000263967	5	BRCA	1	PIK3CA	111 vs 546	ENST00000263967	5	11	0.6081	1.8002	0.637	0.4972	0.223
PIK3CA:545:01:ENST00000263967	26	UCEC	1	PIK3CA	545 vs 93	ENST00000263967	26	8	0.6081	NA	0.9993	0.6832	0.3693
PIK3CA:1021:01:ENST00000263967	4	UCEC	1	PIK3CA	1021 vs 88	ENST00000263967	4	17	0.6082	0	0.9995	0.9931	0.9055
PIK3CA:111:01:ENST00000263967	4	UCEC	1	PIK3CA	111 vs 88	ENST00000263967	4	17	0.6082	0	0.9995	0.6927	0.3758
TP53:241:01:ENST00000269305	6	OV	1	TP53	241 vs 307	ENST00000269305	6	4	0.6095	0.6602	0.5626	0.6873	0.2901
TP53:278:01:ENST00000269305	6	OV	1	TP53	278 vs 342	ENST00000269305	6	4	0.6095	0.6544	0.5847	0.638	0.2232
APC:216:01:ENST00000257430	10	COAD	1	APC	216 vs 876	ENST00000257430	10	12	0.6101	0.6035	0.5648	0.7025	0.4037
TP53:125:01:ENST00000269305	4	HNSC	1	TP53	125 vs 282	ENST00000269305	4	8	0.6101	1.6233	0.5798	0.5916	0.3338
TP53:273:01:ENST00000269305	15	LUSC	1	TP53	273 vs 331	ENST00000269305	14	7	0.6101	1.8707	0.5692	0.2641	0.1166
TP53:273:01:ENST00000269305	12	HNSC	1	TP53	273 vs 294	ENST00000269305	12	4	0.611	1.8493	0.5722	0.0543	0.0298
TP53:154:01:ENST00000269305	7	LUSC	1	TP53	154 vs 266	ENST00000269305	7	5	0.6111	0.5987	0.609	0.7579	0.4662
TP53:248:01:ENST00000269305	7	STAD	1	TP53	248 vs 282	ENST00000269305	7	5	0.6111	0.6228	0.61	0.848	0.5609
TP53:125:01:ENST00000269305	4	HNSC	1	TP53	125 vs 248	ENST00000269305	4	13	0.6118	1.5822	0.5852	0.6306	0.3756
TP53:158:01:ENST00000269305	16	LUSC	1	TP53	158 vs 278	ENST00000269305	16	10	0.6122	1.5215	0.6124	0.6242	0.3399
TP53:249:01:ENST00000269305	8	LUAD	1	TP53	249 vs 273	ENST00000269305	8	5	0.6123	1.9481	0.5674	0.7677	0.457
TP53:245:01:ENST00000269305	4	COAD	1	TP53	245 vs 282	ENST00000269305	4	11	0.6154	0	0.9992	0.8823	0.6237
TP53:241:01:ENST00000269305	6	OV	1	TP53	241 vs 331	ENST00000269305	6	7	0.6154	0.583	0.5572	0.0974	0.0342
PIK3CA:542:01:ENST00000263967	38	BRCA	1	PIK3CA	542 vs 726	ENST00000263967	38	8	0.6156	NA	0.9992	0.455	0.2363
TP53:273:01:ENST00000269305	11	STAD	1	TP53	273 vs 282	ENST00000269305	11	5	0.6181	0.6919	0.6148	0.7725	0.4924
TP53:173:01:ENST00000269305	4	LGG	1	TP53	173 vs 220	ENST00000269305	4	9	0.6182	0	0.9997	0.4604	0.2403
PTEN:127:01:ENST00000371953	6	UCEC	1	PTEN	127 vs 136	ENST00000371953	5	7	0.6187	0.4726	0.5514	0.6181	0.3263
TP53:273:01:ENST00000269305	7	BLCA	1	TP53	273 vs 331	ENST00000269305	7	7	0.6189	1.5473	0.6159	0.5535	0.2683
HRAS:13:01:ENST00000311189	4	BLCA	1	HRAS	13 vs 61	ENST00000311189	4	6	0.619	1.6526	0.6232	0.7171	0.3941
TP53:132:01:ENST00000269305	5	BRCA	1	TP53	132 vs 285	ENST00000269305	5	4	0.619	0.4529	0.5187	0.4653	0.1981
TP53:238:01:ENST00000269305	4	GBM	1	TP53	238 vs 282	ENST00000269305	4	6	0.619	2.2457	0.294	1	1
TP53:110:01:ENST00000269305	5	HNSC	1	TP53	110 vs 151	ENST00000269305	5	5	0.619	0.634	0.6026	0.75	0.4481
TP53:136:01:ENST00000269305	5	HNSC	1	TP53	136 vs 224	ENST00000269305	5	4	0.619	0.603	0.5836	0.9478	0.7402
TP53:136:01:ENST00000269305	5	HNSC	1	TP53	136 vs 280	ENST00000269305	5	5	0.619	0.6584	0.6138	0.926	0.6913
TP53:157:01:ENST00000269305	5	LUAD	1	TP53	157 vs 248	ENST00000269305	5	4	0.619	NA	0.9996	0.2685	0.1143
CDKN2A:110:01:ENST00000304494	5	LUSC	1	CDKN2A	110 vs 84	ENST00000304494	5	6	0.619	0.5981	0.5778	0.9553	0.7665
TP53:105:01:ENST00000269305	5	LUSC	1	TP53	105 vs 271	ENST00000269305	5	4	0.619	2.137	0.5135	1	0.9961
TP53:126:01:ENST00000269305	6	LUSC	1	TP53	126 vs 280	ENST00000269305	6	4	0.619	0.6362	0.5822	0.9896	0.884
TP53:266:01:ENST00000269305	5	LUSC	1	TP53	266 vs 271	ENST00000269305	5	4	0.619	2.1154	0.5517	0.7191	0.4033
TP53:271:01:ENST00000269305	4	LUSC	1	TP53	271 vs 282	ENST00000269305	4	6	0.619	0.4906	0.54	0.9553	0.7611
TP53:157:01:ENST00000269305	5	OV	1	TP53	157 vs 306	ENST00000269305	5	4	0.619	0.6225	0.5868	0.4076	0.1095
TP53:157:01:ENST00000269305	5	OV	1	TP53	157 vs 307	ENST00000269305	5	4	0.619	0.6225	0.5868	0.4076	0.1095
TP53:237:01:ENST00000269305	5	OV	1	TP53	237 vs 282	ENST00000269305	5	5	0.619	0.6179	0.563	0.8358	0.5456
SMAD4:361:01:ENST00000342988	4	READ	1	SMAD4	361 vs 537	ENST00000342988	4	5	0.619	0.4082	0.5285	0.1741	0.0598
CTNNB1:33:01:ENST00000349496	27	UCEC	1	CTNNB1	33 vs 45	ENST00000349496	26	4	0.6196	0.4041	0.4607	0.9631	0.7776
TP53:173:01:ENST00000269305	7	HNSC	1	TP53	173 vs 196	ENST00000269305	7	8	0.6213	1.411	0.6775	0.9826	0.8507
PIK3CA:1047:01:ENST00000263967	16	COAD	1	PIK3CA	1047 vs 88	ENST00000263967	16	5	0.6232	0.3086	0.4061	0.4897	0.2679
TP53:196:01:ENST00000269305	5	LGG	1	TP53	196 vs 273	ENST00000269305	5	59	0.6241	0.7684	0.7359	0.363	0.1104
PTEN:127:01:ENST00000371953	6	UCEC	1	PTEN	127 vs 323	ENST00000371953	5	11	0.625	2.4495	0.5285	0.9235	0.6946
TP53:273:01:ENST00000269305	7	BLCA	1	TP53	273 vs 336	ENST00000269305	7	5	0.6263	1.6222	0.599	0.8891	0.6267
TP53:224:01:ENST00000269305	4	HNSC	1	TP53	224 vs 273	ENST00000269305	4	12	0.6264	1.6632	0.5358	0.1067	0.0696
PIK3CA:542:01:ENST00000263967	16	CESC	1	PIK3CA	542 vs 545	ENST00000263967	16	28	0.6265	0.743	0.6386	0.9361	0.7161
TP53:273:01:ENST00000269305	5	LUAD	1	TP53	273 vs 331	ENST00000269305	5	5	0.627	1.8002	0.637	0.9828	0.8523
TP53:157:01:ENST00000269305	5	OV	1	TP53	157 vs 237	ENST00000269305	5	5	0.627	0.6474	0.6177	0.8619	0.5818
TP53:159:01:ENST00000269305	4	LUSC	1	TP53	159 vs 248	ENST00000269305	4	10	0.6274	0.5571	0.602	0.8937	0.6406
TP53:173:01:ENST00000269305	4	BRCA	1	TP53	173 vs 285	ENST00000269305	4	4	0.6286	3.4641	0.3809	0.1217	0.0216
TP53:213:01:ENST00000269305	4	ESCA	1	TP53	213 vs 282	ENST00000269305	4	4	0.6286	0.4529	0.5187	0.4514	0.2262
TP53:187:01:ENST00000269305	6	LUSC	1	TP53	187 vs 214	ENST00000269305	6	4	0.6286	0.4082	0.5285	0.445	0.22
PTEN:170:01:ENST00000371953	4	UCEC	1	PTEN	170 vs 57	ENST00000371953	4	4	0.6286	2	0.5714	1	0.9961
APC:1450:01:ENST00000257430	19	COAD	1	APC	1450 vs 943	ENST00000257430	19	4	0.6295	0.7063	0.6807	0.5256	0.2249
TP53:179:01:ENST00000269305	9	LUSC	1	TP53	179 vs 278	ENST00000269305	9	10	0.6295	1.541	0.6358	0.958	0.7687
PTEN:157:01:ENST00000371953	4	UCEC	1	PTEN	157 vs 323	ENST00000371953	4	11	0.63	2.8868	0.4546	0.9814	0.8481
TP53:163:01:ENST00000269305	7	HNSC	1	TP53	163 vs 331	ENST00000269305	7	4	0.6303	0.625	0.6106	0.8804	0.6003
TP53:158:01:ENST00000269305	4	LGG	1	TP53	158 vs 282	ENST00000269305	4	7	0.6303	2.958	0.4586	0.2389	0.0999
TP53:135:01:ENST00000269305	4	LUSC	1	TP53	135 vs 163	ENST00000269305	4	7	0.6303	2.2361	0.5699	0.7456	0.4577
TP53:175:01:ENST00000269305	15	OV	1	TP53	175 vs 241	ENST00000269305	15	6	0.6304	0.7192	0.6266	0.765	0.4461
APC:1450:01:ENST00000257430	19	COAD	1	APC	1450 vs 216	ENST00000257430	19	10	0.6306	1.4805	0.6392	0.997	0.9378
APC:805:01:ENST00000257430	5	COAD	1	APC	805 vs 876	ENST00000257430	5	12	0.6306	0.5605	0.6055	0.9589	0.7742
SPOP:102:01:ENST00000347630	8	PRAD	1	SPOP	102 vs 87	ENST00000347630	8	7	0.6312	NA	0.9996	0.6178	0.3282
TP53:307:01:ENST00000269305	5	LUSC	1	TP53	307 vs 331	ENST00000269305	5	7	0.6313	0.4472	0.5852	0.0263	0.0067
PTEN:267:01:ENST00000371953	9	UCEC	1	PTEN	267 vs 92	ENST00000371953	9	6	0.6318	0.6124	0.7301	0.1351	0.0496
ARID1A:1276:01:ENST00000324856	6	UCEC	1	ARID1A	1276 vs 1326	ENST00000324856	6	5	0.632	NA	0.9996	0.8137	0.5223
ARID1A:1326:01:ENST00000324856	5	UCEC	1	ARID1A	1326 vs 2141	ENST00000324856	5	6	0.632	0	0.9996	0.6231	0.3369
TP53:158:01:ENST00000269305	16	LUSC	1	TP53	158 vs 159	ENST00000269305	16	4	0.6324	0.4507	0.4973	0.0274	0.0309
NFE2L2:31:01:ENST00000397062	6	LUSC	1	NFE2L2	31 vs 79	ENST00000397062	6	9	0.6326	0.4633	0.5402	0.6663	0.3585
NFE2L2:31:01:ENST00000397062	6	LUSC	1	NFE2L2	31 vs 34	ENST00000397062	6	16	0.6345	0.6849	0.6476	0.8917	0.6392
APC:302:01:ENST00000257430	5	COAD	1	APC	302 vs 941	ENST00000257430	5	4	0.6349	NA	0.9996	0.1489	0.0521
TP53:280:01:ENST00000269305	5	HNSC	1	TP53	280 vs 337	ENST00000269305	5	5	0.6349	1.5696	0.6218	0.7495	0.434
TP53:196:01:ENST00000269305	5	LGG	1	TP53	196 vs 213	ENST00000269305	5	5	0.6349	0.2887	0.3809	0.2658	0.0974
TP53:157:01:ENST00000269305	5	LUAD	1	TP53	157 vs 158	ENST00000269305	5	5	0.6349	0.6325	0.6511	0.7178	0.419
TP53:193:01:ENST00000269305	5	LUAD	1	TP53	193 vs 273	ENST00000269305	5	5	0.6349	0	0.9996	0.5008	0.2322
TP53:237:01:ENST00000269305	5	OV	1	TP53	237 vs 238	ENST00000269305	5	5	0.6349	0.538	0.5402	0.4916	0.2274
ZMYM2:1044:01:ENST00000382871	5	UCEC	1	ZMYM2	1044 vs 1250	ENST00000382871	5	4	0.6349	NA	0.9994	0.2071	0.073
APC:1414:01:ENST00000257430	7	COAD	1	APC	1414 vs 499	ENST00000257430	6	6	0.6364	0.4082	0.5285	0.4439	0.2067
TP53:173:01:ENST00000269305	7	HNSC	1	TP53	173 vs 236	ENST00000269305	7	4	0.6364	1.8415	0.6008	0.9931	0.9064
TP53:173:01:ENST00000269305	7	HNSC	1	TP53	173 vs 278	ENST00000269305	7	4	0.6364	1.9632	0.5619	0.9358	0.7172
TP53:176:01:ENST00000269305	6	HNSC	1	TP53	176 vs 337	ENST00000269305	6	5	0.6364	0.6224	0.6363	0.7321	0.4328
TP53:105:01:ENST00000269305	5	LUSC	1	TP53	105 vs 193	ENST00000269305	5	7	0.6364	1.9433	0.589	0.0321	0.0023
TP53:154:01:ENST00000269305	7	LUSC	1	TP53	154 vs 307	ENST00000269305	7	5	0.6364	1.9893	0.5771	0.1114	0.0329
TP53:241:01:ENST00000269305	6	OV	1	TP53	241 vs 278	ENST00000269305	6	6	0.6364	1.4329	0.6414	0.9999	0.9873
TP53:175:01:ENST00000269305	15	OV	1	TP53	175 vs 275	ENST00000269305	15	4	0.6367	1.3901	0.6889	0.4265	0.1508
APC:1414:01:ENST00000257430	7	COAD	1	APC	1414 vs 564	ENST00000257430	6	4	0.6381	0.4082	0.5285	0.3463	0.1751
TP53:187:01:ENST00000269305	10	OV	1	TP53	187 vs 272	ENST00000269305	10	6	0.6389	1.3915	0.6486	0.9716	0.8087
PPP2R1A:256:01:ENST00000322088	10	UCEC	1	PPP2R1A	256 vs 257	ENST00000322088	10	4	0.6394	0.5631	0.6434	0.9974	0.943
CTNNB1:32:01:ENST00000349496	14	UCEC	1	CTNNB1	32 vs 33	ENST00000349496	14	26	0.6405	0.7004	0.7728	0.9733	0.8203
TP53:187:01:ENST00000269305	6	LUSC	1	TP53	187 vs 282	ENST00000269305	6	6	0.6407	1.4887	0.6664	0.971	0.8087
TP53:266:01:ENST00000269305	5	OV	1	TP53	266 vs 331	ENST00000269305	5	7	0.6414	1.4398	0.6374	0.1831	0.0266
TP53:195:01:ENST00000269305	12	OV	1	TP53	195 vs 281	ENST00000269305	12	4	0.6418	1.7347	0.6228	0.9804	0.8435
TP53:157:01:ENST00000269305	4	HNSC	1	TP53	157 vs 163	ENST00000269305	4	7	0.6424	0.5562	0.6125	0.9517	0.7506
TP53:237:01:ENST00000269305	4	LGG	1	TP53	237 vs 282	ENST00000269305	4	7	0.6424	0.6695	0.6667	0.7585	0.4363
TP53:192:01:ENST00000269305	5	OV	1	TP53	192 vs 234	ENST00000269305	5	5	0.6429	NA	0.9996	0.9905	0.8899
TP53:152:01:ENST00000269305	5	STAD	1	TP53	152 vs 176	ENST00000269305	5	5	0.6429	0.4633	0.5304	0.4548	0.1917
ARID1A:1326:01:ENST00000324856	5	UCEC	1	ARID1A	1326 vs 551	ENST00000324856	5	5	0.6429	0	0.9996	0.9996	0.9774
PIK3CA:1047:01:ENST00000263967	41	UCEC	1	PIK3CA	1047 vs 542	ENST00000263967	41	23	0.6436	2.0147	0.5361	0.7798	0.4841
PIK3R1:582:01:ENST00000521381	13	UCEC	1	PIK3R1	582 vs 642	ENST00000521381	12	5	0.6471	NA	0.9995	0.2422	0.0801
APC:1378:01:ENST00000257430	6	COAD	1	APC	1378 vs 1408	ENST00000257430	6	4	0.6476	0.6381	0.6565	0.8787	0.5969
TP53:132:01:ENST00000269305	6	OV	1	TP53	132 vs 342	ENST00000269305	6	4	0.6476	1.4354	0.6409	0.4185	0.1134
PTEN:130:01:ENST00000371953	66	UCEC	1	PTEN	130 vs 173	ENST00000371953	63	6	0.6479	0.5974	0.634	0.9971	0.943
APC:1378:01:ENST00000257430	6	COAD	1	APC	1378 vs 1556	ENST00000257430	6	9	0.6498	1.6378	0.6223	0.897	0.6448
TP53:163:01:ENST00000269305	9	OV	1	TP53	163 vs 241	ENST00000269305	9	6	0.6505	1.3531	0.6607	0.261	0.0954
TP53:110:01:ENST00000269305	5	BRCA	1	TP53	110 vs 135	ENST00000269305	5	4	0.6508	0	0.9996	0.672	0.3864
TP53:132:01:ENST00000269305	5	BRCA	1	TP53	132 vs 278	ENST00000269305	5	4	0.6508	NA	0.9996	0.422	0.203
TP53:157:01:ENST00000269305	4	BRCA	1	TP53	157 vs 245	ENST00000269305	4	5	0.6508	NA	NA	0.0734	0.0271
TP53:195:01:ENST00000269305	4	BRCA	1	TP53	195 vs 245	ENST00000269305	4	5	0.6508	NA	NA	0.0734	0.0271
TP53:238:01:ENST00000269305	4	BRCA	1	TP53	238 vs 242	ENST00000269305	4	5	0.6508	NA	NA	0.2545	0.1089
TP53:238:01:ENST00000269305	4	BRCA	1	TP53	238 vs 245	ENST00000269305	4	5	0.6508	NA	NA	0.0389	0.0159
PTEN:173:01:ENST00000371953	4	GBM	1	PTEN	173 vs 233	ENST00000371953	4	5	0.6508	1.5548	0.5687	0.6873	0.2901
TP53:205:01:ENST00000269305	4	LUAD	1	TP53	205 vs 331	ENST00000269305	4	5	0.6508	NA	0.9996	0.2339	0.0959
TP53:248:01:ENST00000269305	4	LUAD	1	TP53	248 vs 331	ENST00000269305	4	5	0.6508	0	0.9996	0.9937	0.9109
TP53:331:01:ENST00000269305	5	LUAD	1	TP53	331 vs 337	ENST00000269305	5	4	0.6508	0	0.9996	0.3861	0.1865
TP53:220:01:ENST00000269305	5	LUSC	1	TP53	220 vs 298	ENST00000269305	5	4	0.6508	1.5447	0.6177	0.984	0.858
TMC5:276:06:ENST00000396229	5	SKCM	6	TMC5	276 vs 690	ENST00000396229	5	4	0.6508	NA	0.9996	0.7513	0.452
PIK3CA:546:01:ENST00000263967	18	UCEC	1	PIK3CA	546 vs 88	ENST00000263967	18	16	0.6508	1.8123	0.6074	0.9128	0.6703
PTEN:173:01:ENST00000371953	7	UCEC	1	PTEN	173 vs 323	ENST00000371953	7	11	0.652	1.8257	0.6707	0.2157	0.0945
PTEN:127:01:ENST00000371953	6	UCEC	1	PTEN	127 vs 130	ENST00000371953	5	63	0.6523	1.7367	0.61	0.8746	0.5918
PIK3CA:420:01:ENST00000263967	5	BRCA	1	PIK3CA	420 vs 546	ENST00000263967	5	11	0.6525	NA	NA	0.0407	0.0227
TP53:173:01:ENST00000269305	4	LGG	1	TP53	173 vs 273	ENST00000269305	4	59	0.6525	0	0.9983	0.6049	0.3505
CTNNB1:32:01:ENST00000349496	17	LIHC	1	CTNNB1	32 vs 45	ENST00000349496	17	16	0.6533	1.333	0.6511	0.5733	0.2945
PIK3CA:1047:01:ENST00000263967	41	UCEC	1	PIK3CA	1047 vs 546	ENST00000263967	41	18	0.6535	0.7231	0.6733	0.9397	0.7228
TP53:245:01:ENST00000269305	4	UCEC	1	TP53	245 vs 248	ENST00000269305	4	15	0.6538	0	0.9993	0.9521	0.7509
TP53:195:01:ENST00000269305	4	BRCA	1	TP53	195 vs 285	ENST00000269305	4	4	0.6571	0	0.9994	0.0417	0.0056
APC:554:01:ENST00000257430	4	COAD	1	APC	554 vs 564	ENST00000257430	4	4	0.6571	0.7071	0.8092	0.4122	0.1801
TP53:125:01:ENST00000269305	4	HNSC	1	TP53	125 vs 278	ENST00000269305	4	4	0.6571	2.3028	0.4977	0.9711	0.8093
TP53:125:01:ENST00000269305	4	HNSC	1	TP53	125 vs 307	ENST00000269305	4	4	0.6571	1.4142	0.7309	0.2366	0.0584
TP53:125:01:ENST00000269305	4	HNSC	1	TP53	125 vs 331	ENST00000269305	4	4	0.6571	1.4142	0.7309	0.926	0.6913
TP53:157:01:ENST00000269305	4	HNSC	1	TP53	157 vs 307	ENST00000269305	4	4	0.6571	0.4744	0.5463	0.6997	0.3851
TP53:224:01:ENST00000269305	4	HNSC	1	TP53	224 vs 331	ENST00000269305	4	4	0.6571	1.8588	0.5402	0.7351	0.4325
TP53:278:01:ENST00000269305	4	HNSC	1	TP53	278 vs 307	ENST00000269305	4	4	0.6571	0.4744	0.5463	0.9858	0.866
TP53:278:01:ENST00000269305	4	HNSC	1	TP53	278 vs 331	ENST00000269305	4	4	0.6571	0.4744	0.5463	0.9858	0.866
TP53:307:01:ENST00000269305	4	HNSC	1	TP53	307 vs 331	ENST00000269305	4	4	0.6571	1.4142	0.7309	0.926	0.6913
TP53:173:01:ENST00000269305	4	LGG	1	TP53	173 vs 193	ENST00000269305	4	4	0.6571	0	0.9996	0.6644	0.3621
TP53:225:01:ENST00000269305	4	LUSC	1	TP53	225 vs 271	ENST00000269305	4	4	0.6571	1.4142	0.8092	0.7057	0.3904
TP53:261:01:ENST00000269305	4	OV	1	TP53	261 vs 342	ENST00000269305	4	4	0.6571	1.7037	0.5656	0.6065	0.239
TP53:281:01:ENST00000269305	4	OV	1	TP53	281 vs 307	ENST00000269305	4	4	0.6571	0.5115	0.5647	0.1906	0.0346
TP53:187:01:ENST00000269305	4	SARC	1	TP53	187 vs 213	ENST00000269305	4	4	0.6571	0.7071	0.8065	0.997	0.9382
PTPRB:1560:06:ENST00000261266	4	SKCM	6	PTPRB	1560 vs 529	ENST00000261266	4	4	0.6571	1.4142	0.6743	0.6065	0.239
TTN:13056:06:ENST00000591111	4	SKCM	6	TTN	13056 vs 3271	ENST00000591111	4	4	0.6571	2.1077	0.5463	0.8294	0.529
PTEN:27:01:ENST00000371953	4	UCEC	1	PTEN	27 vs 342	ENST00000371953	4	4	0.6571	2	0.6311	0.6923	0.3958
TP53:193:01:ENST00000269305	4	UCEC	1	TP53	193 vs 245	ENST00000269305	4	4	0.6571	NA	0.9996	0.9447	0.737
TP53:132:01:ENST00000269305	4	BLCA	1	TP53	132 vs 285	ENST00000269305	4	10	0.6573	1.5499	0.6325	0.7829	0.5025
TP53:125:01:ENST00000269305	7	LUSC	1	TP53	125 vs 158	ENST00000269305	7	16	0.6573	0.5796	0.6201	0.376	0.1831
TP53:157:01:ENST00000269305	14	LUSC	1	TP53	157 vs 273	ENST00000269305	14	14	0.6584	0.7732	0.6721	0.8799	0.6134
TP53:220:01:ENST00000269305	8	OV	1	TP53	220 vs 307	ENST00000269305	8	4	0.6586	0.7056	0.6261	0.4497	0.1095
TP53:151:01:ENST00000269305	5	HNSC	1	TP53	151 vs 298	ENST00000269305	5	5	0.6587	0.7186	0.6691	0.971	0.8096
LMAN1:275:01:ENST00000251047	4	UCEC	1	LMAN1	275 vs 305	ENST00000251047	4	10	0.6593	0	0.9995	0.9999	0.9876
TP53:157:01:ENST00000269305	14	LUSC	1	TP53	157 vs 187	ENST00000269305	14	6	0.6596	0.7249	0.6609	0.9751	0.8244
PIK3CA:1047:01:ENST00000263967	129	BRCA	1	PIK3CA	1047 vs 546	ENST00000263967	129	10	0.66	1.5972	0.6505	0.7065	0.386
TP53:285:01:ENST00000269305	10	BLCA	1	TP53	285 vs 336	ENST00000269305	10	5	0.6613	1.4507	0.6686	0.9891	0.8827
TP53:245:01:ENST00000269305	14	LUSC	1	TP53	245 vs 266	ENST00000269305	14	5	0.6639	0.6687	0.6358	0.8064	0.5285
PTEN:233:01:ENST00000371953	24	UCEC	1	PTEN	233 vs 267	ENST00000371953	24	9	0.664	0.6985	0.7699	0.9354	0.7142
CTNNB1:37:01:ENST00000349496	5	LIHC	1	CTNNB1	37 vs 45	ENST00000349496	5	16	0.6649	2.2799	0.5117	0.1009	0.0647
TP53:248:01:ENST00000269305	14	ESCA	1	TP53	248 vs 273	ENST00000269305	14	9	0.6651	1.2993	0.6704	0.9305	0.7053
TP53:125:01:ENST00000269305	7	LUSC	1	TP53	125 vs 163	ENST00000269305	7	7	0.6655	0.5345	0.6666	0.5827	0.3054
TP53:175:01:ENST00000269305	22	COAD	1	TP53	175 vs 331	ENST00000269305	22	4	0.6656	0.5219	0.5738	0.2029	0.127
TP53:175:01:ENST00000269305	19	BRCA	1	TP53	175 vs 245	ENST00000269305	19	5	0.6657	0.4564	0.5796	0.9734	0.8145
PIK3CA:542:01:ENST00000263967	4	STAD	1	PIK3CA	542 vs 545	ENST00000263967	4	9	0.6657	1.6634	0.6788	0.9391	0.7176
TP53:214:01:ENST00000269305	4	LUSC	1	TP53	214 vs 245	ENST00000269305	4	14	0.666	2.1741	0.5035	0.0807	0.0552
TP53:157:01:ENST00000269305	14	LUSC	1	TP53	157 vs 193	ENST00000269305	14	7	0.6662	1.7482	0.618	0.458	0.2281
TP53:132:01:ENST00000269305	4	BLCA	1	TP53	132 vs 331	ENST00000269305	4	7	0.6667	1.5811	0.648	0.7057	0.4213
TP53:282:01:ENST00000269305	5	BRCA	1	TP53	282 vs 285	ENST00000269305	5	4	0.6667	1.759	0.5939	0.072	0.0136
PCBP1:100:01:ENST00000303577	8	COAD	1	PCBP1	100 vs 102	ENST00000303577	8	4	0.6667	0	0.9996	0.8003	0.4886
PTEN:132:01:ENST00000371953	4	GBM	1	PTEN	132 vs 233	ENST00000371953	4	5	0.6667	1.4416	0.6359	0.6873	0.2901
TP53:173:01:ENST00000269305	7	HNSC	1	TP53	173 vs 224	ENST00000269305	7	4	0.6667	0.6827	0.6779	0.9786	0.8364
TP53:173:01:ENST00000269305	7	HNSC	1	TP53	173 vs 307	ENST00000269305	7	4	0.6667	0.7241	0.7255	0.9347	0.712
TP53:278:01:ENST00000269305	4	HNSC	1	TP53	278 vs 282	ENST00000269305	4	8	0.6667	0.5959	0.6441	0.9529	0.7537
TP53:157:01:ENST00000269305	5	LUAD	1	TP53	157 vs 273	ENST00000269305	5	5	0.6667	0.6325	0.6511	0.3589	0.154
TP53:159:01:ENST00000269305	4	LUAD	1	TP53	159 vs 249	ENST00000269305	4	8	0.6667	1.4414	0.6652	0.2333	0.0326
TP53:135:01:ENST00000269305	4	LUSC	1	TP53	135 vs 154	ENST00000269305	4	7	0.6667	1.6073	0.7014	0.4373	0.2246
TP53:172:01:ENST00000269305	4	LUSC	1	TP53	172 vs 282	ENST00000269305	4	6	0.6667	0	0.9995	0.5598	0.2908
TP53:192:01:ENST00000269305	5	OV	1	TP53	192 vs 261	ENST00000269305	5	4	0.6667	0.4935	0.5483	0.6893	0.375
PIK3R1:564:01:ENST00000521381	6	UCEC	1	PIK3R1	564 vs 567	ENST00000521381	6	4	0.6667	NA	0.9995	0.1729	0.0739
PPP2R1A:183:01:ENST00000322088	8	UCEC	1	PPP2R1A	183 vs 257	ENST00000322088	8	4	0.6667	0.4472	0.5699	0.9176	0.6836
PTEN:16:01:ENST00000371953	4	UCEC	1	PTEN	16 vs 70	ENST00000371953	4	6	0.6667	0	0.9996	0.401	0.1715
TP53:193:01:ENST00000269305	4	UCEC	1	TP53	193 vs 220	ENST00000269305	4	7	0.6667	NA	0.9996	0.9985	0.9562
TP53:105:01:ENST00000269305	5	LUSC	1	TP53	105 vs 158	ENST00000269305	5	16	0.667	1.3459	0.677	0.6662	0.3444
PIK3CA:1043:01:ENST00000263967	7	UCEC	1	PIK3CA	1043 vs 1047	ENST00000263967	7	41	0.6672	1.5593	0.6915	0.6682	0.3477
TP53:241:01:ENST00000269305	5	BLCA	1	TP53	241 vs 285	ENST00000269305	5	10	0.668	0.7317	0.6875	0.2664	0.0834
APC:216:01:ENST00000257430	10	COAD	1	APC	216 vs 302	ENST00000257430	10	5	0.668	0.541	0.5416	0.9989	0.9627
TP53:157:01:ENST00000269305	5	OV	1	TP53	157 vs 175	ENST00000269305	5	15	0.6682	1.4941	0.6321	0.8914	0.6415
TP53:176:01:ENST00000269305	8	OV	1	TP53	176 vs 195	ENST00000269305	8	12	0.6686	0.7514	0.6756	0.9233	0.6882
[truncated: 1,163 more rows]
